# Supplementary material for: Microarray Meta-Analysis of RNA-Binding Protein Functions in Alternative Polyadenylation
Source: PLoS One. 2014 Mar 12;9(3):e90774. doi: 10.1371/journal.pone.0090774 (PMC3951239; doi:10.1371/journal.pone.0090774)
Supplement: Table S1 — Summarized poly(A) sites database from three Poly(A) data sources for mouse Mm9 genome. (XLSX) [file pone.0090774.s001.xlsx]

## Sheet: table_s1
chr	start	end	polyA.sources	score	strand
chr1	3503632	3503633	pA:pas:B+0;pas:M+2	0	+
chr1	4678011	4678012	pA:pas:L+0;pas:M+8;pas:T+0	0	+
chr1	4762623	4762624	pA:Mm.347572.1.1	0	+
chr1	4831380	4831381	pA:pas:K+1;pas:M+11	0	+
chr1	4832907	4832908	pA:uc007afg.1.tx_end	0	+
chr1	4836818	4836819	pA:Mm.299955.1.19;pas:B+2;pas:K+2;pas:L+3;pas:M+13;pas:T+2;uc007afh.1.tx_end	0	+
chr1	4841607	4841608	pA:pas:K+4;pas:L+4;pas:M+15	0	+
chr1	4887048	4887049	pA:Mm.207263.1.23	0	+
chr1	4887552	4887553	pA:Mm.207263.1.26	0	+
chr1	4887894	4887895	pA:pas:K+5;pas:M+16	0	+
chr1	4887990	4887991	pA:Mm.207263.1.27;pas:L+5;pas:M+17;uc007afi.2.tx_end;uc011wht.1.tx_end;uc011whu.1.tx_end	0	+
chr1	4890011	4890012	pA:pas:K+6;pas:M+18	0	+
chr1	5089857	5089858	pA:uc007afm.1.tx_end	0	+
chr1	5152528	5152529	pA:Mm.27082.1.32;pas:B+3;pas:K+9;pas:L+7;pas:M+23;pas:T+4	0	+
chr1	5152629	5152630	pA:Mm.27082.1.33;uc007afn.1.tx_end	0	+
chr1	5592946	5592947	pA:uc007afo.1.tx_end;uc007afp.1.tx_end;uc007afq.1.tx_end	0	+
chr1	6239084	6239085	pA:Mm.293811.1.37	0	+
chr1	6239464	6239465	pA:Mm.293811.1.38	0	+
chr1	6240002	6240003	pA:Mm.293811.1.39	0	+
chr1	6240247	6240248	pA:uc007afs.1.tx_end	0	+
chr1	6241961	6241962	pA:pas:L+9;pas:M+30	0	+
chr1	6264427	6264428	pA:pas:K+10;pas:L+10;pas:M+31;pas:T+5	0	+
chr1	6264580	6264581	pA:Mm.293811.1.60;pas:K+11;pas:L+11;pas:M+32	0	+
chr1	6264717	6264718	pA:Mm.293811.1.62	0	+
chr1	6265248	6265249	pA:Mm.293811.1.65;pas:B+7;pas:K+12;pas:L+12;pas:M+33	0	+
chr1	6265364	6265365	pA:pas:L+13;pas:M+34	0	+
chr1	6265669	6265670	pA:pas:B+8;pas:K+13;pas:L+14;pas:M+35	0	+
chr1	6266184	6266185	pA:uc007afr.2.tx_end;uc007aft.2.tx_end;uc007afu.2.tx_end;uc011whx.1.tx_end	0	+
chr1	6266455	6266456	pA:pas:B+9;pas:K+14;pas:M+36	0	+
chr1	6272847	6272848	pA:pas:K+15;pas:M+37	0	+
chr1	6372479	6372480	pA:pas:K+16;pas:M+38	0	+
chr1	6384811	6384812	pA:uc007afv.2.tx_end	0	+
chr1	6834969	6834970	pA:Mm.234612.1.16	0	+
chr1	6848896	6848897	pA:Mm.234612.1.19	0	+
chr1	6848985	6848986	pA:Mm.234612.1.20	0	+
chr1	6849858	6849859	pA:Mm.234612.1.22	0	+
chr1	6851020	6851021	pA:Mm.234612.1.23;uc007afw.1.tx_end;uc007afx.1.tx_end;uc007afy.1.tx_end;uc007afz.1.tx_end;uc007aga.1.tx_end	0	+
chr1	7110762	7110763	pA:pas:B+11;pas:M+43	0	+
chr1	7162201	7162202	pA:Mm.21539.1.16	0	+
chr1	7162824	7162825	pA:Mm.21539.1.17;pas:K+17;pas:L+15;pas:M+46	0	+
chr1	7163710	7163711	pA:pas:B+12;pas:K+18;pas:L+16;pas:M+47;uc007agb.1.tx_end;uc007agc.1.tx_end;uc007agd.1.tx_end;uc011why.1.tx_end	0	+
chr1	7186948	7186949	pA:pas:B+13;pas:K+19;pas:L+17;pas:M+48;pas:T+6	0	+
chr1	8343804	8343805	pA:pas:B+14;pas:L+19;pas:M+52;pas:T+7	0	+
chr1	8644125	8644126	pA:uc011wia.1.tx_end	0	+
chr1	9535980	9535981	pA:Mm.29061.1.1	0	+
chr1	9537535	9537536	pA:Mm.29061.1.2;pas:B+16;pas:K+20;pas:L+20;pas:M+54;pas:T+8;uc007agk.2.tx_end	0	+
chr1	9553705	9553706	pA:pas:K+21;pas:M+55	0	+
chr1	9566603	9566604	pA:Mm.28514.1.21;pas:K+22;pas:L+21	0	+
chr1	9566818	9566819	pA:Mm.28514.1.24;pas:K+23;pas:L+22;pas:M+58	0	+
chr1	9566999	9567000	pA:pas:K+24;pas:K+25;pas:L+23;pas:M+59;pas:M+60	0	+
chr1	9568050	9568051	pA:Mm.28514.1.26;uc007agl.2.tx_end;uc007agm.2.tx_end	0	+
chr1	9570757	9570758	pA:pas:K+26;pas:M+61;uc011wic.1.tx_end	0	+
chr1	9572301	9572302	pA:pas:K+27;pas:L+24;pas:M+62	0	+
chr1	9617222	9617223	pA:Mm.279818.1.10;uc007agp.1.tx_end	0	+
chr1	9630662	9630663	pA:Mm.336406.1.1	0	+
chr1	9782002	9782003	pA:uc007agt.1.tx_end	0	+
chr1	9889935	9889936	pA:Mm.336410.1.34;pas:B+21;pas:K+28;pas:L+26;pas:M+66	0	+
chr1	9890089	9890090	pA:Mm.336410.1.35	0	+
chr1	9890929	9890930	pA:Mm.336410.1.37;pas:L+27;pas:T+9	0	+
chr1	9892648	9892649	pA:uc007agu.1.tx_end;uc007agv.1.tx_end;uc007agw.1.tx_end;uc007agx.1.tx_end;uc007agy.1.tx_end;uc011wid.1.tx_end	0	+
chr1	9912605	9912606	pA:uc007agz.1.tx_end	0	+
chr1	9931034	9931035	pA:uc011wie.1.tx_end	0	+
chr1	10028400	10028401	pA:pas:B+23;pas:K+31;pas:M+69;pas:T+11	0	+
chr1	10050539	10050540	pA:uc007ahg.1.tx_end	0	+
chr1	10058056	10058057	pA:uc007ahh.1.tx_end;uc007ahj.1.tx_end;uc007ahk.1.tx_end;uc007ahl.1.tx_end	0	+
chr1	10059294	10059295	pA:pas:L+29;pas:M+70	0	+
chr1	10078264	10078265	pA:uc011wig.1.tx_end	0	+
chr1	10085990	10085991	pA:Mm.379331.1.6	0	+
chr1	10126853	10126854	pA:Mm.379331.1.27;pas:B+24;pas:K+33;pas:L+32;pas:M+71;pas:T+12;uc007ahi.1.tx_end;uc011wih.1.tx_end	0	+
chr1	11140151	11140152	pA:uc007aht.1.tx_end	0	+
chr1	11150676	11150677	pA:uc007ahu.1.tx_end	0	+
chr1	11293762	11293763	pA:pas:K+37;pas:L+33;pas:M+78;uc007ahs.2.tx_end;uc007ahv.2.tx_end	0	+
chr1	11586397	11586398	pA:uc011wii.1.tx_end	0	+
chr1	11588667	11588668	pA:Mm.52021.1.8	0	+
chr1	11591901	11591902	pA:uc007ahw.2.tx_end;uc007ahy.2.tx_end	0	+
chr1	11923820	11923821	pA:uc007ahz.1.tx_end	0	+
chr1	11965982	11965983	pA:Mm.52021.1.12;uc007ahx.2.tx_end;uc011wij.1.tx_end;uc011wik.1.tx_end	0	+
chr1	12063310	12063311	pA:pas:B+29;pas:K+38	0	+
chr1	12789340	12789341	pA:pas:K+39;pas:M+85	0	+
chr1	12812996	12812997	pA:uc007aic.1.tx_end	0	+
chr1	12850457	12850458	pA:Mm.45563.1.59;pas:B+31;pas:K+40;pas:M+86;uc007aia.2.tx_end;uc007aib.2.tx_end;uc007aid.1.tx_end;uc007aie.1.tx_end	0	+
chr1	12850987	12850988	pA:Mm.45563.1.60	0	+
chr1	12851271	12851272	pA:Mm.45563.1.61;pas:K+41;pas:M+88;pas:T+16	0	+
chr1	13651030	13651031	pA:pas:K+42;pas:M+92	0	+
chr1	13691803	13691804	pA:Mm.311142.1.4;uc007aiv.1.tx_end	0	+
chr1	13988934	13988935	pA:pas:K+43;pas:L+39;pas:M+94	0	+
chr1	14172928	14172929	pA:pas:M+96;pas:T+20	0	+
chr1	14748453	14748454	pA:pas:B+33;pas:M+101	0	+
chr1	14767011	14767012	pA:uc007ajb.1.tx_end	0	+
chr1	14942787	14942788	pA:pas:L+40;pas:M+103	0	+
chr1	15704294	15704295	pA:uc007aje.1.tx_end	0	+
chr1	15705247	15705248	pA:Mm.156081.1.1	0	+
chr1	15713830	15713831	pA:Mm.85879.1.1	0	+
chr1	15812093	15812094	pA:uc007ajf.1.tx_end	0	+
chr1	15812183	15812184	pA:uc007ajg.1.tx_end	0	+
chr1	15833222	15833223	pA:pas:M+106;pas:T+25	0	+
chr1	15833509	15833510	pA:Mm.4306.1.15;pas:B+37;pas:K+45;pas:M+107;uc007ajh.1.tx_end;uc007aji.1.tx_end	0	+
chr1	16122437	16122438	pA:Mm.274376.1.18	0	+
chr1	16122496	16122497	pA:pas:B+38;pas:K+47;pas:L+41;pas:T+27	0	+
chr1	16122630	16122631	pA:Mm.274376.1.19;pas:K+48;pas:L+42;pas:M+111;pas:T+28;uc007ajm.1.tx_end	0	+
chr1	16123813	16123814	pA:pas:K+49;pas:T+29	0	+
chr1	16139604	16139605	pA:pas:K+50;pas:M+112;pas:T+30	0	+
chr1	16667910	16667911	pA:Mm.194225.1.8;Mm.363019.1.1;pas:B+39;pas:K+52;pas:L+43;pas:M+118	0	+
chr1	16668275	16668276	pA:Mm.194225.1.9;pas:B+40;pas:K+53;pas:L+44;pas:M+119;pas:T+33	0	+
chr1	16668355	16668356	pA:uc007ajx.1.tx_end;uc007ajy.1.tx_end	0	+
chr1	16699685	16699686	pA:uc007ajz.2.tx_end;uc011wim.1.tx_end	0	+
chr1	16704517	16704518	pA:pas:K+54;pas:T+34	0	+
chr1	16706552	16706553	pA:pas:K+55;pas:K+56;pas:M+122	0	+
chr1	16839307	16839308	pA:pas:L+45;pas:M+123	0	+
chr1	17113482	17113483	pA:pas:B+42;pas:M+124	0	+
chr1	17148824	17148825	pA:uc007akb.2.tx_end	0	+
chr1	17154351	17154352	pA:Mm.18218.1.17;pas:B+43;pas:M+125;uc007akc.2.tx_end	0	+
chr1	17163183	17163184	pA:uc007akd.1.tx_end	0	+
chr1	17615527	17615528	pA:Mm.379277.1.4	0	+
chr1	17621019	17621020	pA:Mm.220826.1.1;pas:K+60;pas:M+128;uc007ake.2.tx_end	0	+
chr1	17754775	17754776	pA:Mm.289625.1.15	0	+
chr1	17755255	17755256	pA:Mm.289625.1.17	0	+
chr1	17756287	17756288	pA:uc007akg.1.tx_end;uc007akh.1.tx_end	0	+
chr1	18544144	18544145	pA:pas:B+44;pas:K+61;pas:L+46;pas:T+35	0	+
chr1	19156412	19156413	pA:uc007akp.1.tx_end	0	+
chr1	19204523	19204524	pA:Mm.137021.1.6;uc007aks.1.tx_end	0	+
chr1	19228163	19228164	pA:uc007akq.1.tx_end	0	+
chr1	19228655	19228656	pA:Mm.137021.1.17;pas:K+64;pas:M+137	0	+
chr1	19228814	19228815	pA:uc007akr.1.tx_end;uc007akt.1.tx_end;uc007aku.1.tx_end	0	+
chr1	19228926	19228927	pA:pas:K+66;pas:M+138	0	+
chr1	20429700	20429701	pA:pas:K+69;pas:L+48;pas:T+36	0	+
chr1	20672967	20672968	pA:uc011win.1.tx_end	0	+
chr1	20724576	20724577	pA:uc007aky.1.tx_end	0	+
chr1	20793461	20793462	pA:uc007alb.1.tx_end	0	+
chr1	20925836	20925837	pA:Mm.40780.1.12	0	+
chr1	20927426	20927427	pA:Mm.40780.1.13	0	+
chr1	20927497	20927498	pA:pas:B+46;pas:T+39	0	+
chr1	20928338	20928339	pA:Mm.40780.1.16	0	+
chr1	20928836	20928837	pA:Mm.40780.1.17;uc007ald.1.tx_end;uc007ale.1.tx_end	0	+
chr1	20929137	20929138	pA:pas:B+49;pas:M+141	0	+
chr1	20929729	20929730	pA:pas:B+51;pas:M+142	0	+
chr1	20980921	20980922	pA:pas:B+54;pas:M+143;uc007alf.2.tx_end	0	+
chr1	21177707	21177708	pA:Mm.304763.1.1;pas:K+73;pas:M+146;uc007alh.1.tx_end	0	+
chr1	21177944	21177945	pA:Mm.304763.1.2	0	+
chr1	21209041	21209042	pA:pas:B+57;pas:M+148	0	+
chr1	21220247	21220248	pA:Mm.227104.1.11;pas:B+59;pas:K+75;pas:L+50;pas:M+150;pas:T+41;uc007ali.1.tx_end;uc007alj.1.tx_end	0	+
chr1	21255292	21255293	pA:Mm.14719.1.13;pas:B+60;pas:K+76;pas:L+56;pas:M+151;pas:T+42	0	+
chr1	21255443	21255444	pA:pas:K+77;pas:L+57;pas:M+152	0	+
chr1	21255655	21255656	pA:Mm.14719.1.14;pas:K+78;pas:L+58;uc007alk.1.tx_end;uc007all.1.tx_end	0	+
chr1	21255741	21255742	pA:Mm.14719.1.15;pas:K+79;pas:L+59;pas:M+153	0	+
chr1	21342280	21342281	pA:Mm.26006.1.4;uc007aln.1.tx_end	0	+
chr1	21359823	21359824	pA:uc007alo.1.tx_end	0	+
chr1	21376464	21376465	pA:uc007alp.2.tx_end	0	+
chr1	23279177	23279178	pA:uc011wip.1.tx_end	0	+
chr1	23279296	23279297	pA:pas:K+80;pas:M+164	0	+
chr1	23298622	23298623	pA:uc007ama.2.tx_end	0	+
chr1	23300913	23300914	pA:pas:B+64;pas:K+81;pas:K+82;pas:L+63;pas:M+167;pas:M+168;pas:T+44	0	+
chr1	23822578	23822579	pA:Mm.262803.1.2;uc007amd.1.tx_end	0	+
chr1	23852462	23852463	pA:pas:B+67;pas:K+91	0	+
chr1	23854696	23854697	pA:uc007ame.1.tx_end	0	+
chr1	23855985	23855986	pA:pas:B+68;pas:K+92	0	+
chr1	24001940	24001941	pA:Mm.36295.1.1	0	+
chr1	24143142	24143143	pA:Mm.329093.1.1	0	+
chr1	24199448	24199449	pA:pas:B+71;pas:K+93;pas:L+64;pas:T+45	0	+
chr1	24259421	24259422	pA:Mm.154662.1.53	0	+
chr1	24259507	24259508	pA:Mm.154662.1.54	0	+
chr1	24259576	24259577	pA:uc007amo.2.tx_end;uc007amp.2.tx_end	0	+
chr1	24570690	24570691	pA:pas:L+65;pas:M+171	0	+
chr1	24595639	24595640	pA:pas:M+173;pas:T+46	0	+
chr1	24619630	24619631	pA:pas:B+74;pas:L+66	0	+
chr1	24761763	24761764	pA:pas:B+76;pas:K+95;pas:L+67;pas:M+176	0	+
chr1	24763896	24763897	pA:Mm.336563.1.7	0	+
chr1	24819877	24819878	pA:Mm.336563.1.32;pas:K+96;pas:M+178	0	+
chr1	24820360	24820361	pA:pas:K+97;pas:M+179	0	+
chr1	24820415	24820416	pA:Mm.336563.1.35;pas:B+78;pas:K+98;pas:L+69;pas:M+180;pas:T+49	0	+
chr1	24820859	24820860	pA:pas:B+79;pas:K+99;pas:L+70;pas:M+181	0	+
chr1	24821882	24821883	pA:Mm.336563.1.37	0	+
chr1	24822178	24822179	pA:pas:B+80;pas:M+182	0	+
chr1	24822304	24822305	pA:Mm.336563.1.39;pas:B+81;pas:K+100;pas:L+71;pas:M+183	0	+
chr1	24823145	24823146	pA:pas:B+82;pas:K+101;pas:L+72;pas:M+184;uc007amt.1.tx_end;uc007amu.1.tx_end	0	+
chr1	25991179	25991180	pA:uc011wit.1.tx_end	0	+
chr1	27097402	27097403	pA:pas:K+103;pas:L+74	0	+
chr1	27959031	27959032	pA:uc007ana.1.tx_end	0	+
chr1	27959680	27959681	pA:pas:K+105;pas:K+106;pas:L+79	0	+
chr1	28685286	28685287	pA:pas:M+202;pas:T+53	0	+
chr1	29080862	29080863	pA:pas:L+82;pas:T+55	0	+
chr1	30827639	30827640	pA:uc007and.1.tx_end	0	+
chr1	31222244	31222245	pA:pas:B+87;pas:M+213	0	+
chr1	31261569	31261570	pA:Mm.161414.1.8;uc007ank.1.tx_end	0	+
chr1	31281131	31281132	pA:uc007anm.1.tx_end	0	+
chr1	31324905	31324906	pA:uc011wiu.1.tx_end	0	+
chr1	32303722	32303723	pA:pas:B+88;pas:K+111;uc007ann.1.tx_end	0	+
chr1	32367934	32367935	pA:Mm.336594.1.3	0	+
chr1	32395185	32395186	pA:uc007ano.1.tx_end	0	+
chr1	32714582	32714583	pA:uc007anp.1.tx_end	0	+
chr1	32791004	32791005	pA:pas:B+90;pas:K+112	0	+
chr1	33539227	33539228	pA:uc007ans.1.tx_end	0	+
chr1	33727556	33727557	pA:uc007ant.2.tx_end	0	+
chr1	33783735	33783736	pA:uc007anu.1.tx_end	0	+
chr1	33792198	33792199	pA:uc007anv.1.tx_end	0	+
chr1	33797555	33797556	pA:Mm.86744.1.27;pas:K+113;pas:M+227	0	+
chr1	33797616	33797617	pA:Mm.86744.1.28	0	+
chr1	33799408	33799409	pA:pas:B+93;pas:K+114;pas:L+87;pas:M+228;pas:T+59;uc007anw.2.tx_end;uc007anx.2.tx_end;uc011wix.1.tx_end	0	+
chr1	34193979	34193980	pA:uc007aog.1.tx_end;uc007aoh.1.tx_end	0	+
chr1	34209363	34209364	pA:uc007aok.1.tx_end	0	+
chr1	34209597	34209598	pA:pas:K+115;pas:T+62	0	+
chr1	34220315	34220316	pA:uc007aof.1.tx_end	0	+
chr1	34240120	34240121	pA:uc007aol.1.tx_end	0	+
chr1	34240444	34240445	pA:pas:K+116;pas:M+235;pas:T+63	0	+
chr1	34240745	34240746	pA:pas:K+117;pas:M+236;pas:T+64	0	+
chr1	34286090	34286091	pA:uc007aom.1.tx_end	0	+
chr1	34319095	34319096	pA:uc007aon.1.tx_end	0	+
chr1	34364559	34364560	pA:Mm.336625.1.66;pas:B+95;pas:K+119;pas:L+89;pas:M+238;pas:T+65	0	+
chr1	34365249	34365250	pA:Mm.336625.1.68;pas:K+120;pas:M+239	0	+
chr1	34365503	34365504	pA:Mm.336625.1.69;pas:B+96;pas:K+121;pas:L+90;pas:M+240;pas:T+66;uc007aoi.1.tx_end;uc007aoj.1.tx_end;uc007aoo.1.tx_end;uc007aop.1.tx_end	0	+
chr1	34501832	34501833	pA:Mm.291745.1.15;pas:B+97;pas:K+122;pas:L+91;pas:M+242;pas:T+67	0	+
chr1	34502591	34502592	pA:pas:B+98;pas:K+123;pas:L+92;pas:M+243;pas:T+68;uc007aor.2.tx_end	0	+
chr1	34506154	34506155	pA:pas:B+99;pas:K+124;pas:L+93;pas:M+244;pas:T+70	0	+
chr1	34506204	34506205	pA:pas:B+100;pas:K+125;pas:L+94;pas:T+71	0	+
chr1	34530629	34530630	pA:pas:M+247;pas:T+72;uc007aos.1.tx_end	0	+
chr1	34532577	34532578	pA:pas:K+126;pas:M+248;pas:T+73;uc007aot.1.tx_end	0	+
chr1	34559906	34559907	pA:uc007aov.1.tx_end	0	+
chr1	34601155	34601156	pA:uc007aow.1.tx_end	0	+
chr1	34647788	34647789	pA:Mm.330696.1.4;Mm.371015.1.1;uc011wjc.1.tx_end	0	+
chr1	34657692	34657693	pA:uc007aoz.1.tx_end	0	+
chr1	34657969	34657970	pA:uc007apa.1.tx_end	0	+
chr1	34658342	34658343	pA:uc007apb.1.tx_end	0	+
chr1	34659315	34659316	pA:uc007apc.1.tx_end	0	+
chr1	34663251	34663252	pA:uc007apd.1.tx_end	0	+
chr1	34781145	34781146	pA:uc007ape.1.tx_end	0	+
chr1	34865755	34865756	pA:uc007apg.1.tx_end	0	+
chr1	34866062	34866063	pA:uc007aph.1.tx_end	0	+
chr1	34869598	34869599	pA:Mm.41604.1.19;pas:B+103;pas:K+127;pas:M+250;uc007apf.1.tx_end;uc007api.1.tx_end	0	+
chr1	34930800	34930801	pA:uc007apk.1.tx_end	0	+
chr1	34934005	34934006	pA:Mm.292751.1.14;pas:T+77;pas:T+78	0	+
chr1	34934073	34934074	pA:pas:K+128;pas:M+252;pas:T+79	0	+
chr1	34936429	34936430	pA:Mm.292751.1.22;pas:B+107;pas:K+130;pas:L+95;pas:M+253;pas:T+81;uc007apl.1.tx_end	0	+
chr1	35574551	35574552	pA:pas:K+131;pas:L+96	0	+
chr1	35937967	35937968	pA:pas:M+260;pas:T+82;uc007apm.1.tx_end	0	+
chr1	36068738	36068739	pA:Mm.243856.1.1	0	+
chr1	36161827	36161828	pA:pas:K+133;pas:L+97;pas:T+85	0	+
chr1	36161894	36161895	pA:pas:K+134;pas:L+98;pas:T+86	0	+
chr1	36162083	36162084	pA:pas:K+135;pas:L+99	0	+
chr1	36163215	36163216	pA:pas:K+136;pas:L+100;pas:T+87;pas:T+88	0	+
chr1	36163290	36163291	pA:Mm.213566.1.1;pas:B+108;pas:K+137;pas:L+101;pas:M+262;pas:T+89;uc007apn.2.tx_end	0	+
chr1	36377371	36377372	pA:Mm.34316.1.20;pas:B+109;pas:M+264;pas:T+92	0	+
chr1	36379820	36379821	pA:Mm.34316.1.21;pas:B+110;pas:M+266;pas:T+94	0	+
chr1	36380873	36380874	pA:uc007apu.2.tx_end;uc007apv.2.tx_end;uc007apw.2.tx_end;uc007apx.2.tx_end;uc007apy.2.tx_end;uc011wjg.1.tx_end;uc011wjh.1.tx_end	0	+
chr1	36390264	36390265	pA:Mm.261185.1.1	0	+
chr1	36478954	36478955	pA:uc007aqb.1.tx_end	0	+
chr1	36519383	36519384	pA:pas:M+268;pas:T+95	0	+
chr1	36565620	36565621	pA:Mm.45651.1.3;pas:K+141;pas:L+103;pas:M+269;pas:T+96;uc007aqg.2.tx_end	0	+
chr1	36576329	36576330	pA:pas:K+142;pas:L+104;pas:M+270	0	+
chr1	36582531	36582532	pA:Mm.256323.1.14;pas:K+143;pas:M+271	0	+
chr1	36582629	36582630	pA:pas:M+272;pas:T+97	0	+
chr1	36583251	36583252	pA:pas:M+273;pas:T+98	0	+
chr1	36584059	36584060	pA:Mm.256323.1.17;pas:B+113;pas:K+144;pas:L+105;pas:M+274;pas:T+99	0	+
chr1	36585101	36585102	pA:Mm.256323.1.20;pas:B+115;pas:K+145;pas:K+146;pas:L+106;pas:M+275;pas:T+100;uc007aqi.1.tx_end;uc007aqj.1.tx_end;uc007aqk.1.tx_end;uc011wjk.1.tx_end	0	+
chr1	36659162	36659163	pA:pas:B+117;pas:K+149;pas:L+107;pas:M+277;pas:T+103	0	+
chr1	36750232	36750233	pA:Mm.180182.1.3;pas:B+120;pas:K+150;pas:L+108;pas:M+279;pas:T+104;uc007aqw.1.tx_end	0	+
chr1	36750380	36750381	pA:Mm.180182.1.4	0	+
chr1	36750524	36750525	pA:pas:B+121;pas:K+151;pas:L+109;pas:M+280;pas:T+105	0	+
chr1	36752258	36752259	pA:pas:B+122;pas:K+153;pas:L+110	0	+
chr1	36752814	36752815	pA:pas:K+154;pas:M+281	0	+
chr1	36753406	36753407	pA:pas:B+123;pas:K+155	0	+
chr1	36814797	36814798	pA:uc007aqy.1.tx_end	0	+
chr1	36839662	36839663	pA:Mm.8038.1.15;pas:B+124;pas:K+157;pas:L+111;pas:M+283;pas:T+108;uc007aqz.1.tx_end;uc007ara.1.tx_end;uc007arb.1.tx_end	0	+
chr1	36997331	36997332	pA:pas:B+126;pas:K+158	0	+
chr1	37120493	37120494	pA:uc007are.1.tx_end	0	+
chr1	37133839	37133840	pA:uc007arf.1.tx_end;uc011wjo.1.tx_end	0	+
chr1	37244449	37244450	pA:Mm.148848.1.8;uc007arh.2.tx_end;uc011wjp.1.tx_end	0	+
chr1	37319412	37319413	pA:Mm.214224.1.2	0	+
chr1	37320228	37320229	pA:Mm.214224.1.3;uc007ari.1.tx_end	0	+
chr1	37359646	37359647	pA:uc007arj.1.tx_end	0	+
chr1	37456401	37456402	pA:uc007ark.1.tx_end	0	+
chr1	37461283	37461284	pA:pas:B+130;pas:M+293;uc007arn.1.tx_end;uc011wjq.1.tx_end;uc011wjr.1.tx_end	0	+
chr1	37465234	37465235	pA:Mm.150420.1.19	0	+
chr1	37467594	37467595	pA:Mm.5294.1.1;pas:B+131;pas:K+159;pas:L+112;uc007arl.2.tx_end	0	+
chr1	37495831	37495832	pA:Mm.27404.1.15;pas:B+132;pas:K+160;pas:L+113;pas:M+296;pas:T+113	0	+
chr1	37495968	37495969	pA:uc007arp.1.tx_end;uc007arq.1.tx_end	0	+
chr1	37923273	37923274	pA:pas:K+162;pas:M+298	0	+
chr1	37928232	37928233	pA:uc007asg.1.tx_end	0	+
chr1	37933072	37933073	pA:Mm.63984.1.8	0	+
chr1	37933142	37933143	pA:uc007ash.2.tx_end	0	+
chr1	37935814	37935815	pA:pas:K+163;pas:L+114;pas:M+300	0	+
chr1	37955181	37955182	pA:Mm.26614.1.8;pas:B+133;pas:K+165;pas:L+115;pas:M+301;pas:T+115;uc007asj.1.tx_end	0	+
chr1	37955291	37955292	pA:Mm.26614.1.9;pas:K+166;pas:M+302	0	+
chr1	38093113	38093114	pA:pas:B+135;pas:K+171;pas:M+310;pas:T+118	0	+
chr1	38108867	38108868	pA:pas:B+136;pas:K+172;pas:L+116;pas:M+312;pas:T+120	0	+
chr1	38109112	38109113	pA:pas:B+137;pas:K+173;pas:M+313;pas:T+121	0	+
chr1	38109704	38109705	pA:pas:B+138;pas:K+174;pas:T+122	0	+
chr1	38110013	38110014	pA:pas:K+175;pas:M+314	0	+
chr1	38112423	38112424	pA:uc007aso.1.tx_end	0	+
chr1	38450818	38450819	pA:uc007asw.1.tx_end	0	+
chr1	39007120	39007121	pA:Mm.333709.1.2;uc007atb.1.tx_end	0	+
chr1	39053509	39053510	pA:pas:K+179;pas:M+318	0	+
chr1	39054082	39054083	pA:pas:B+140;pas:K+181;pas:M+319;uc007atc.1.tx_end	0	+
chr1	39054183	39054184	pA:pas:K+182;pas:L+117	0	+
chr1	39420084	39420085	pA:Mm.2380.1.10;pas:B+144;pas:M+321;pas:T+127;uc007atd.2.tx_end	0	+
chr1	39428213	39428214	pA:Mm.379302.1.5;pas:B+146;pas:K+183;pas:L+118;pas:M+322;pas:T+129;uc007ate.2.tx_end	0	+
chr1	39428338	39428339	pA:Mm.379302.1.7;pas:B+147;pas:K+184;pas:L+119;pas:M+323;pas:T+130	0	+
chr1	39428507	39428508	pA:pas:B+148;pas:K+185;pas:M+324;pas:T+131	0	+
chr1	39428755	39428756	pA:Mm.379302.1.14;uc007atf.2.tx_end	0	+
chr1	39429984	39429985	pA:pas:M+325;pas:T+132	0	+
chr1	39602245	39602246	pA:Mm.259421.1.8;pas:B+152;pas:K+186;pas:L+120;pas:M+326;pas:T+135	0	+
chr1	39603721	39603722	pA:uc007ati.1.tx_end;uc007atj.1.tx_end	0	+
chr1	39606624	39606625	pA:pas:B+154;pas:M+327	0	+
chr1	39634651	39634652	pA:pas:B+155;pas:L+121	0	+
chr1	40074099	40074100	pA:pas:B+158;pas:M+331	0	+
chr1	40081812	40081813	pA:Mm.19073.1.45;pas:B+159;pas:K+189;pas:L+122;pas:M+332;pas:T+140	0	+
chr1	40082071	40082072	pA:Mm.19073.1.48	0	+
chr1	40082167	40082168	pA:pas:M+333;pas:T+141	0	+
chr1	40082591	40082592	pA:Mm.19073.1.50	0	+
chr1	40083154	40083155	pA:Mm.19073.1.51;pas:B+160;pas:K+190;pas:L+123;pas:M+334;pas:T+142;uc007atr.1.tx_end;uc007ats.1.tx_end;uc011wjv.1.tx_end;uc011wjw.1.tx_end;uc011wjx.1.tx_end	0	+
chr1	40084893	40084894	pA:pas:B+161;pas:M+335	0	+
chr1	40182070	40182071	pA:Mm.1349.1.9;pas:M+336;pas:T+143;uc007atu.1.tx_end;uc011wjy.1.tx_end	0	+
chr1	40373027	40373028	pA:Mm.896.1.10;pas:K+192;pas:L+126;pas:M+338;uc007atv.1.tx_end;uc007atw.1.tx_end	0	+
chr1	40422315	40422316	pA:uc007atx.1.tx_end;uc007aty.1.tx_end	0	+
chr1	40424422	40424423	pA:Mm.155583.1.12;pas:L+127;pas:M+339;pas:T+144	0	+
chr1	40466156	40466157	pA:pas:K+193;pas:M+340	0	+
chr1	40503567	40503568	pA:Mm.289824.1.10	0	+
chr1	40505206	40505207	pA:uc007atz.2.tx_end;uc007aua.2.tx_end	0	+
chr1	40522258	40522259	pA:uc007aub.2.tx_end;uc007auc.2.tx_end	0	+
chr1	40541187	40541188	pA:uc007aue.1.tx_end	0	+
chr1	40548424	40548425	pA:Mm.253664.1.8;uc007aud.1.tx_end;uc007auf.1.tx_end;uc007aug.1.tx_end	0	+
chr1	40549331	40549332	pA:pas:K+194;pas:T+145	0	+
chr1	40557698	40557699	pA:Mm.253664.1.11;pas:K+195;pas:L+128;pas:M+344;pas:T+146;uc007auh.1.tx_end;uc011wjz.1.tx_end	0	+
chr1	40583761	40583762	pA:uc007aui.1.tx_end	0	+
chr1	40596329	40596330	pA:uc007auj.1.tx_end	0	+
chr1	40606141	40606142	pA:uc007auk.1.tx_end	0	+
chr1	40687265	40687266	pA:Mm.108602.1.7	0	+
chr1	40687575	40687576	pA:pas:B+163;pas:K+196;pas:M+346;uc007aul.1.tx_end	0	+
chr1	40784004	40784005	pA:uc007aum.1.tx_end	0	+
chr1	40784525	40784526	pA:pas:K+197;pas:M+347;pas:T+147	0	+
chr1	40825157	40825158	pA:pas:K+198;pas:M+348	0	+
chr1	40825729	40825730	pA:uc007aun.1.tx_end	0	+
chr1	40826117	40826118	pA:Mm.256414.1.6;pas:B+164;pas:K+201;pas:L+129;pas:M+350;pas:T+148	0	+
chr1	40912111	40912112	pA:uc007auq.1.tx_end	0	+
chr1	40913731	40913732	pA:Mm.334678.1.2;pas:M+355;pas:T+149	0	+
chr1	41087582	41087583	pA:pas:B+165;pas:M+359	0	+
chr1	42757054	42757055	pA:Mm.40572.1.3;pas:B+170;pas:K+205;uc007auw.1.tx_end	0	+
chr1	42759374	42759375	pA:Mm.336710.1.1	0	+
chr1	42760020	42760021	pA:uc007aux.2.tx_end	0	+
chr1	42761648	42761649	pA:pas:B+172;pas:K+207	0	+
chr1	42801635	42801636	pA:Mm.263247.1.1	0	+
chr1	42908794	42908795	pA:pas:L+130;pas:M+365	0	+
chr1	42938775	42938776	pA:uc007auz.2.tx_end	0	+
chr1	42955972	42955973	pA:Mm.252982.1.13;uc007avb.1.tx_end	0	+
chr1	42962527	42962528	pA:Mm.252982.1.22;pas:B+177;pas:K+211;pas:L+131;pas:M+368;pas:T+150;uc007ava.2.tx_end	0	+
chr1	43011998	43011999	pA:pas:B+178;pas:T+151;uc007avc.2.tx_end	0	+
chr1	43092300	43092301	pA:Mm.44892.1.8;uc007avd.2.tx_end	0	+
chr1	43172443	43172444	pA:Mm.28817.1.14	0	+
chr1	43172790	43172791	pA:Mm.28817.1.15;pas:B+183;pas:K+214;pas:L+133;pas:M+371;pas:T+152;uc007avj.1.tx_end	0	+
chr1	43246602	43246603	pA:uc007avm.2.tx_end	0	+
chr1	43519066	43519067	pA:uc007avn.1.tx_end	0	+
chr1	43627362	43627363	pA:Mm.233951.1.23;pas:B+184;pas:K+215;pas:M+375;pas:T+154;uc007avo.2.tx_end	0	+
chr1	43799408	43799409	pA:Mm.50109.1.7;uc007avp.2.tx_end	0	+
chr1	43800370	43800371	pA:Mm.378507.1.1	0	+
chr1	43945638	43945639	pA:Mm.6836.1.1	0	+
chr1	43946575	43946576	pA:pas:K+217;pas:L+135;pas:M+377;pas:T+155	0	+
chr1	44013847	44013848	pA:uc007avr.1.tx_end	0	+
chr1	44047419	44047420	pA:Mm.234139.1.46	0	+
chr1	44047506	44047507	pA:uc011wkb.1.tx_end	0	+
chr1	44058343	44058344	pA:uc007avu.1.tx_end	0	+
chr1	44059184	44059185	pA:Mm.234139.1.60;pas:B+185;pas:K+219;pas:L+136;pas:M+381;pas:T+156	0	+
chr1	44059844	44059845	pA:Mm.234139.1.65;pas:K+220;pas:M+382;pas:K+221;pas:L+137;pas:M+383;uc007avs.1.tx_end;uc007avt.1.tx_end	0	+
chr1	44201365	44201366	pA:Mm.370332.1.14;pas:K+223;pas:L+138;pas:M+385	0	+
chr1	44201615	44201616	pA:uc007awd.2.tx_end;uc007awe.2.tx_end;uc007awf.2.tx_end	0	+
chr1	44206366	44206367	pA:uc007awg.1.tx_end	0	+
chr1	44235218	44235219	pA:uc007awh.2.tx_end;uc007awj.1.tx_end	0	+
chr1	44237906	44237907	pA:Mm.2213.1.39	0	+
chr1	44238014	44238015	pA:Mm.2213.1.40;pas:B+187;pas:K+224;pas:L+139;pas:M+389;pas:T+157	0	+
chr1	44238104	44238105	pA:Mm.2213.1.41;uc007awi.2.tx_end	0	+
chr1	44241779	44241780	pA:pas:K+225;pas:L+140	0	+
chr1	44605839	44605840	pA:pas:K+226;pas:L+141;pas:T+158	0	+
chr1	44766911	44766912	pA:pas:B+188;pas:K+227;pas:L+142;pas:M+400	0	+
chr1	44845718	44845719	pA:uc007awl.2.tx_end	0	+
chr1	44853053	44853054	pA:Mm.133132.1.14	0	+
chr1	44853680	44853681	pA:Mm.133132.1.15;pas:K+228;pas:M+402;uc007awm.2.tx_end;uc007awn.2.tx_end	0	+
chr1	45381862	45381863	pA:uc007awp.2.tx_end	0	+
chr1	45405765	45405766	pA:pas:K+230;pas:L+143;pas:M+408;pas:T+159	0	+
chr1	45405862	45405863	pA:Mm.249555.1.79;pas:K+231;pas:L+144;pas:M+409;pas:T+160	0	+
chr1	45406426	45406427	pA:pas:K+232;pas:M+410	0	+
chr1	45406550	45406551	pA:Mm.249555.1.85;Mm.362985.1.1;pas:K+233;pas:M+411;uc007awq.2.tx_end	0	+
chr1	45413519	45413520	pA:Mm.249555.1.87	0	+
chr1	45668541	45668542	pA:uc011wkd.1.tx_end	0	+
chr1	45827046	45827047	pA:uc011wkf.1.tx_end	0	+
chr1	45880493	45880494	pA:Mm.270376.1.37;pas:L+146;pas:M+413;uc007awt.1.tx_end;uc011wkg.1.tx_end	0	+
chr1	46328186	46328187	pA:uc007awy.1.tx_end	0	+
chr1	46430394	46430395	pA:Mm.296880.1.6;Mm.303498.1.1;uc007awx.2.tx_end;uc007awz.2.tx_end	0	+
chr1	46472214	46472215	pA:pas:K+234;pas:M+417	0	+
chr1	46473055	46473056	pA:uc007axa.1.tx_end	0	+
chr1	46864307	46864308	pA:Mm.380314.1.2;uc007axb.1.tx_end	0	+
chr1	47715751	47715752	pA:uc007axe.1.tx_end	0	+
chr1	49397274	49397275	pA:uc007axf.1.tx_end	0	+
chr1	50874544	50874545	pA:uc007axg.2.tx_end	0	+
chr1	50884037	50884038	pA:pas:M+435;pas:T+166	0	+
chr1	50970768	50970769	pA:uc007axh.1.tx_end	0	+
chr1	51036763	51036764	pA:uc007axi.1.tx_end	0	+
chr1	51242553	51242554	pA:Mm.245154.1.11;pas:B+194;pas:L+152;pas:M+438	0	+
chr1	51244113	51244114	pA:uc007axj.1.tx_end	0	+
chr1	51245011	51245012	pA:pas:B+197;pas:M+439	0	+
chr1	51253666	51253667	pA:pas:K+237;pas:L+153;pas:M+440;pas:T+167	0	+
chr1	51359803	51359804	pA:Mm.255909.1.9;pas:K+238;pas:L+154;pas:M+443;uc007axk.1.tx_end	0	+
chr1	51400104	51400105	pA:pas:B+199;pas:M+447	0	+
chr1	52129287	52129288	pA:uc007axw.1.tx_end	0	+
chr1	52164031	52164032	pA:Mm.1550.1.22;pas:M+450;pas:T+168;uc007axx.1.tx_end;uc011wkn.1.tx_end	0	+
chr1	52194695	52194696	pA:uc007axy.1.tx_end	0	+
chr1	52212116	52212117	pA:uc007axz.1.tx_end	0	+
chr1	52212180	52212181	pA:pas:L+155;pas:T+169	0	+
chr1	52212259	52212260	pA:Mm.277406.1.52;pas:K+239;pas:L+156;pas:M+452;pas:T+170	0	+
chr1	52216395	52216396	pA:pas:K+240;pas:L+157;pas:M+453;pas:T+172	0	+
chr1	52216880	52216881	pA:Mm.277406.1.63;pas:B+201;pas:K+241;pas:L+158;pas:M+454;pas:T+173	0	+
chr1	52217253	52217254	pA:pas:K+242;pas:T+174	0	+
chr1	52217765	52217766	pA:Mm.277406.1.64;pas:K+243;pas:L+159;pas:M+455;pas:T+175	0	+
chr1	52218706	52218707	pA:Mm.277406.1.67;uc007aya.1.tx_end;uc007ayb.1.tx_end;uc007ayc.1.tx_end;uc007ayd.1.tx_end	0	+
chr1	52220372	52220373	pA:pas:K+244;pas:T+176	0	+
chr1	52584470	52584471	pA:pas:K+247;pas:M+458	0	+
chr1	52708762	52708763	pA:Mm.83541.1.15;uc007ayk.3.tx_end;uc011wkp.1.tx_end;uc011wkq.1.tx_end	0	+
chr1	52904612	52904613	pA:pas:L+161;pas:M+465;pas:T+181	0	+
chr1	52917008	52917009	pA:uc011wkr.1.tx_end	0	+
chr1	52977704	52977705	pA:Mm.222063.1.21;pas:K+249;pas:L+162;pas:M+466;pas:T+182;uc007ayp.1.tx_end	0	+
chr1	52979033	52979034	pA:pas:K+250;pas:L+163	0	+
chr1	53124922	53124923	pA:uc007ayt.1.tx_end	0	+
chr1	53254534	53254535	pA:uc007ayw.1.tx_end	0	+
chr1	53358796	53358797	pA:uc007ayy.2.tx_end	0	+
chr1	53367088	53367089	pA:Mm.212846.1.10;pas:B+202;pas:K+252;pas:L+164;pas:M+473;pas:T+183;uc011wks.1.tx_end	0	+
chr1	53374313	53374314	pA:pas:B+203;pas:K+253;pas:M+474	0	+
chr1	53375021	53375022	pA:Mm.185144.1.6	0	+
chr1	53380907	53380908	pA:uc007aza.1.tx_end	0	+
chr1	53383018	53383019	pA:Mm.185144.1.15;pas:K+254;pas:L+165;pas:M+475;uc007azb.1.tx_end;uc007azc.1.tx_end;uc007azd.1.tx_end;uc011wkt.1.tx_end	0	+
chr1	53383186	53383187	pA:Mm.185144.1.17;pas:B+204;pas:K+255;pas:L+166;pas:M+476	0	+
chr1	53753410	53753411	pA:uc011wkv.1.tx_end	0	+
chr1	53908626	53908627	pA:pas:M+478;pas:M+479	0	+
chr1	54320791	54320792	pA:pas:M+481;pas:T+185	0	+
chr1	54335804	54335805	pA:uc007azn.1.tx_end	0	+
chr1	54425570	54425571	pA:uc007azo.1.tx_end;uc011wkx.1.tx_end	0	+
chr1	54793659	54793660	pA:uc007azt.1.tx_end	0	+
chr1	55129131	55129132	pA:Mm.281019.1.12;pas:B+206;pas:K+260;pas:L+167;pas:M+487	0	+
chr1	55129545	55129546	pA:Mm.281019.1.13;pas:K+261;pas:L+168;pas:M+488;uc007azz.1.tx_end;uc007baa.1.tx_end	0	+
chr1	55130151	55130152	pA:pas:K+262;pas:M+489	0	+
chr1	55133324	55133325	pA:pas:B+207;pas:K+263;pas:L+169;pas:M+490	0	+
chr1	55148079	55148080	pA:pas:B+208;pas:K+265;pas:L+171;pas:M+491;pas:T+189	0	+
chr1	55148160	55148161	pA:Mm.215667.1.6;pas:B+209;pas:K+266;pas:L+172;pas:M+492;pas:T+190;uc007bac.2.tx_end	0	+
chr1	55152235	55152236	pA:pas:B+210;pas:L+174	0	+
chr1	55205360	55205361	pA:uc007baf.1.tx_end	0	+
chr1	55209828	55209829	pA:pas:K+268;pas:M+494	0	+
chr1	55209919	55209920	pA:Mm.291037.1.11;pas:B+211;pas:K+269;pas:L+175;pas:M+495;pas:T+191	0	+
chr1	55211474	55211475	pA:pas:K+270;pas:L+176;pas:M+498	0	+
chr1	55211695	55211696	pA:pas:B+213;pas:K+271;pas:L+177;pas:M+499	0	+
chr1	55211742	55211743	pA:pas:B+214;pas:K+272;pas:L+178;pas:M+500;uc007bad.1.tx_end;uc007bae.1.tx_end	0	+
chr1	55292466	55292467	pA:pas:B+215;pas:K+273;pas:M+502;uc007bai.1.tx_end	0	+
chr1	55295967	55295968	pA:Mm.19223.1.1;Mm.19223.1.2;pas:B+216;pas:L+179;pas:M+503;pas:T+195	0	+
chr1	55296902	55296903	pA:pas:K+274;pas:M+504;uc007baj.1.tx_end	0	+
chr1	55300882	55300883	pA:pas:B+217;pas:L+180;pas:M+506	0	+
chr1	55305313	55305314	pA:pas:B+218;pas:K+275;pas:M+508	0	+
chr1	55809796	55809797	pA:pas:B+220;pas:K+280;pas:M+511	0	+
chr1	55810938	55810939	pA:pas:K+281;pas:M+512	0	+
chr1	55811128	55811129	pA:uc007ban.2.tx_end	0	+
chr1	56029171	56029172	pA:uc007bao.1.tx_end;uc007bap.1.tx_end	0	+
chr1	56077046	56077047	pA:uc007baq.1.tx_end	0	+
chr1	56286815	56286816	pA:pas:B+222;pas:L+181;pas:M+521;pas:T+198	0	+
chr1	56525948	56525949	pA:pas:B+223;pas:M+523	0	+
chr1	57030598	57030599	pA:pas:B+225;pas:K+283	0	+
chr1	57032039	57032040	pA:uc011wld.1.tx_end	0	+
chr1	57099356	57099357	pA:uc007bat.2.tx_end	0	+
chr1	57186243	57186244	pA:Mm.159035.1.1	0	+
chr1	57440461	57440462	pA:pas:B+228;pas:L+182	0	+
chr1	57442266	57442267	pA:Mm.152736.1.1;pas:B+229;pas:K+284;pas:L+183;pas:M+525;uc007bay.2.tx_end	0	+
chr1	57472747	57472748	pA:Mm.275428.1.10;pas:B+230;pas:K+286;pas:L+184;pas:M+526	0	+
chr1	57472801	57472802	pA:pas:K+287;pas:L+185;pas:M+527;uc007bbc.2.tx_end	0	+
chr1	57474796	57474797	pA:Mm.275428.1.12;pas:B+231;pas:K+288;pas:M+529	0	+
chr1	57939591	57939592	pA:Mm.159989.1.10	0	+
chr1	58003808	58003809	pA:Mm.159989.1.34;pas:B+232;pas:K+289;pas:L+186;pas:M+534;pas:T+203	0	+
chr1	58005240	58005241	pA:Mm.159989.1.35;uc007bbd.2.tx_end;uc007bbe.2.tx_end	0	+
chr1	58011199	58011200	pA:pas:B+233;pas:T+204	0	+
chr1	58072634	58072635	pA:Mm.32800.1.15	0	+
chr1	58074430	58074431	pA:Mm.32800.1.20	0	+
chr1	58082740	58082741	pA:Mm.32800.1.32	0	+
chr1	58083120	58083121	pA:uc007bbk.2.tx_end;uc011wlj.1.tx_end	0	+
chr1	58103058	58103059	pA:pas:L+187;pas:M+537	0	+
chr1	58163259	58163260	pA:Mm.26787.1.17;pas:L+190;pas:M+542;pas:T+207;uc007bbl.1.tx_end	0	+
chr1	58172533	58172534	pA:pas:L+191;pas:M+543	0	+
chr1	58195965	58195966	pA:Mm.20108.1.13	0	+
chr1	58257295	58257296	pA:Mm.20108.1.28;uc007bbm.1.tx_end;uc007bbn.1.tx_end	0	+
chr1	58324770	58324771	pA:Mm.244525.1.15	0	+
chr1	58325442	58325443	pA:Mm.244525.1.16;pas:B+234;pas:M+544;uc007bbo.1.tx_end	0	+
chr1	58436107	58436108	pA:uc007bbp.1.tx_end	0	+
chr1	58462333	58462334	pA:Mm.261831.1.23;pas:L+201;pas:M+545;pas:T+208	0	+
chr1	58463391	58463392	pA:Mm.261831.1.30;pas:B+236;pas:K+292;pas:L+202;pas:M+546;pas:T+209;uc007bbq.1.tx_end;uc007bbr.1.tx_end	0	+
chr1	58464196	58464197	pA:pas:B+237;pas:K+294;pas:L+203;pas:M+547;pas:T+210	0	+
chr1	58481888	58481889	pA:pas:B+238;pas:T+212	0	+
chr1	58518368	58518369	pA:Mm.340248.1.23;pas:B+239;pas:K+297;pas:L+205;pas:M+548;pas:T+213	0	+
chr1	58519119	58519120	pA:pas:B+240;pas:K+298;pas:L+206;pas:M+549;uc007bbz.1.tx_end;uc007bcb.1.tx_end	0	+
chr1	58522508	58522509	pA:pas:B+241;pas:K+299;pas:L+207;pas:M+550;pas:T+214	0	+
chr1	58538659	58538660	pA:uc007bca.1.tx_end	0	+
chr1	58574373	58574374	pA:uc007bcf.1.tx_end	0	+
chr1	58580073	58580074	pA:uc007bcg.1.tx_end	0	+
chr1	58652571	58652572	pA:pas:B+242;pas:M+553	0	+
chr1	58652701	58652702	pA:pas:K+300;pas:M+554;pas:T+215	0	+
chr1	58652805	58652806	pA:Mm.2033.1.4;pas:B+243;pas:B+244;pas:K+301;pas:K+302;pas:L+208;pas:L+209;pas:M+555;pas:T+216;pas:T+217;uc007bck.1.tx_end	0	+
chr1	58654220	58654221	pA:pas:B+245;pas:K+304;pas:L+210;pas:M+556	0	+
chr1	58712674	58712675	pA:Mm.340489.1.5;pas:K+305;pas:M+560;pas:T+218;uc007bcl.1.tx_end	0	+
chr1	58770732	58770733	pA:Mm.336848.1.2;pas:B+246;pas:K+306;pas:L+211;pas:M+561;pas:T+219	0	+
chr1	58771146	58771147	pA:Mm.336848.1.3	0	+
chr1	58774415	58774416	pA:Mm.336848.1.5;pas:K+307;pas:M+562;pas:T+220	0	+
chr1	58774811	58774812	pA:pas:B+247;pas:K+308;pas:M+563;pas:T+221	0	+
chr1	58779915	58779916	pA:pas:K+309;pas:L+212;pas:M+564;pas:T+222;uc007bcr.1.tx_end	0	+
chr1	58790070	58790071	pA:Mm.336848.1.19;uc007bcp.1.tx_end	0	+
chr1	58814191	58814192	pA:pas:K+311;pas:M+565	0	+
chr1	58815727	58815728	pA:Mm.11778.1.1;pas:B+248;pas:K+312;pas:L+215;pas:M+566;pas:T+223;uc007bcn.1.tx_end;uc007bco.1.tx_end;uc007bcq.1.tx_end	0	+
chr1	58903851	58903852	pA:Mm.336851.1.15;pas:K+313;pas:L+216;pas:M+569;pas:T+224	0	+
chr1	58904346	58904347	pA:uc007bcs.1.tx_end;uc007bct.1.tx_end	0	+
chr1	59044690	59044691	pA:uc007bcw.1.tx_end	0	+
chr1	59048365	59048366	pA:Mm.286006.1.15;pas:B+249;pas:K+316;pas:L+217;pas:M+573;uc007bcx.1.tx_end	0	+
chr1	59050180	59050181	pA:uc007bda.1.tx_end	0	+
chr1	59051964	59051965	pA:Mm.286006.1.32;pas:B+250;pas:K+317;pas:L+219;pas:M+574;pas:T+226;uc007bcy.1.tx_end;uc007bcz.1.tx_end	0	+
chr1	59177791	59177792	pA:pas:K+318;pas:M+576;pas:T+227	0	+
chr1	59409212	59409213	pA:uc007bdq.2.tx_end;uc007bdr.2.tx_end;uc007bds.2.tx_end	0	+
chr1	59409835	59409836	pA:Mm.378051.1.1	0	+
chr1	59543798	59543799	pA:uc011wlq.1.tx_end	0	+
chr1	59546447	59546448	pA:pas:B+252;pas:M+582	0	+
chr1	59691352	59691353	pA:Mm.25750.1.17;uc007bdv.1.tx_end	0	+
chr1	59693260	59693261	pA:Mm.25750.1.20;pas:B+253;pas:M+587;pas:T+229	0	+
chr1	59733964	59733965	pA:pas:K+319;pas:L+220;pas:M+588	0	+
chr1	59748853	59748854	pA:uc011wlr.1.tx_end	0	+
chr1	59761721	59761722	pA:pas:K+320;pas:L+221;pas:M+589;pas:T+230;uc011wls.1.tx_end	0	+
chr1	59767434	59767435	pA:Mm.220367.1.25;Mm.220367.1.26	0	+
chr1	59768353	59768354	pA:Mm.220367.1.29;pas:B+256;pas:K+321;pas:L+222;pas:M+590;pas:T+231;uc007bdy.1.tx_end	0	+
chr1	59769036	59769037	pA:Mm.220367.1.31	0	+
chr1	59775894	59775895	pA:pas:B+257;pas:L+223;pas:M+591	0	+
chr1	59925524	59925525	pA:pas:M+593;pas:T+232	0	+
chr1	59927702	59927703	pA:Mm.7106.1.15;uc007bdz.1.tx_end	0	+
chr1	59933775	59933776	pA:Mm.13806.1.1	0	+
chr1	59934233	59934234	pA:pas:B+259;pas:K+324;pas:M+597	0	+
chr1	59934357	59934358	pA:pas:B+260;pas:K+325	0	+
chr1	59934458	59934459	pA:Mm.13806.1.2;pas:B+261;pas:K+326;pas:L+224;pas:M+598	0	+
chr1	59934927	59934928	pA:pas:L+225;pas:M+599	0	+
chr1	59935745	59935746	pA:pas:L+226;pas:M+601	0	+
chr1	59935858	59935859	pA:pas:B+262;pas:M+602	0	+
chr1	60039020	60039021	pA:pas:B+264;pas:L+227;pas:M+603;pas:T+233	0	+
chr1	60039207	60039208	pA:Mm.258250.1.21;pas:K+327;pas:M+604;pas:T+234	0	+
chr1	60041887	60041888	pA:pas:B+265;pas:K+328	0	+
chr1	60042190	60042191	pA:Mm.258250.1.22;pas:B+266;pas:K+329;pas:L+228;pas:M+606;pas:T+235;uc011wlt.1.tx_end	0	+
chr1	60174583	60174584	pA:pas:M+607;pas:T+236	0	+
chr1	60207877	60207878	pA:uc007beh.1.tx_end;uc007bei.1.tx_end;uc011wlu.1.tx_end;uc011wlv.1.tx_end;uc011wlw.1.tx_end	0	+
chr1	60210792	60210793	pA:Mm.276441.1.1	0	+
chr1	60338881	60338882	pA:uc007bek.1.tx_end	0	+
chr1	60388305	60388306	pA:Mm.205224.1.27;uc007bel.1.tx_end	0	+
chr1	60391548	60391549	pA:uc007bej.1.tx_end;uc011wlx.1.tx_end;uc011wly.1.tx_end	0	+
chr1	60395168	60395169	pA:Mm.376247.1.1;pas:K+333;pas:L+229;pas:M+615	0	+
chr1	60429550	60429551	pA:uc007bem.1.tx_end	0	+
chr1	60444230	60444231	pA:uc007ben.1.tx_end;uc007beo.1.tx_end	0	+
chr1	60444903	60444904	pA:Mm.197640.1.21;pas:B+267;pas:K+334;pas:L+230;pas:M+616;pas:T+238	0	+
chr1	60536550	60536551	pA:pas:B+268;pas:M+618;pas:T+239	0	+
chr1	60538006	60538007	pA:Mm.212066.1.37;pas:B+270;pas:K+335;pas:L+231;pas:M+619;pas:T+240;uc007bep.2.tx_end;uc007beq.2.tx_end;uc007ber.2.tx_end	0	+
chr1	60538785	60538786	pA:pas:B+271;pas:M+620	0	+
chr1	60761256	60761257	pA:uc007beu.1.tx_end	0	+
chr1	60762193	60762194	pA:Mm.279821.1.2;pas:B+273;pas:K+336;pas:T+241	0	+
chr1	60821469	60821470	pA:uc007bev.2.tx_end	0	+
chr1	60830202	60830203	pA:pas:K+337;pas:M+621;pas:T+246;uc007bew.2.tx_end	0	+
chr1	60860631	60860632	pA:uc007bey.1.tx_end	0	+
chr1	60958337	60958338	pA:pas:M+623;pas:T+249	0	+
chr1	60972673	60972674	pA:Mm.390.1.12;uc007bez.1.tx_end;uc007bfa.1.tx_end	0	+
chr1	61054687	61054688	pA:Mm.42044.1.13	0	+
chr1	61057164	61057165	pA:pas:M+624;pas:T+250;uc011wlz.1.tx_end	0	+
chr1	61816432	61816433	pA:uc007bfc.2.tx_end	0	+
chr1	62215872	62215873	pA:uc007bfd.2.tx_end	0	+
chr1	62688857	62688858	pA:Mm.380534.1.1;pas:K+340;pas:L+232;pas:M+629;uc007bfe.2.tx_end;uc011wma.1.tx_end	0	+
chr1	62786505	62786506	pA:uc007bfi.1.tx_end	0	+
chr1	62791968	62791969	pA:Mm.266341.1.8	0	+
chr1	62842618	62842619	pA:pas:K+341;pas:L+233	0	+
chr1	62843664	62843665	pA:uc007bfj.1.tx_end;uc007bfk.1.tx_end;uc007bfp.1.tx_end	0	+
chr1	62845884	62845885	pA:pas:B+276;pas:K+342;pas:M+630;pas:T+254	0	+
chr1	62863918	62863919	pA:pas:K+343;pas:M+633	0	+
chr1	62865265	62865266	pA:Mm.266341.1.26;Mm.372142.1.1;pas:B+277;pas:K+344;pas:L+234;pas:M+634;pas:T+255;uc007bfl.1.tx_end;uc007bfm.1.tx_end;uc007bfn.1.tx_end;uc007bfo.1.tx_end	0	+
chr1	63159980	63159981	pA:pas:K+345;pas:M+635	0	+
chr1	63163902	63163903	pA:pas:K+346;pas:M+638	0	+
chr1	63168630	63168631	pA:pas:K+347;pas:L+236;pas:M+639	0	+
chr1	63176185	63176186	pA:pas:K+348;pas:M+640	0	+
chr1	63190241	63190242	pA:pas:K+350;pas:L+237	0	+
chr1	63204863	63204864	pA:uc007bft.1.tx_end	0	+
chr1	63224443	63224444	pA:Mm.2718.1.1	0	+
chr1	63225467	63225468	pA:pas:K+352;pas:M+644;pas:T+257	0	+
chr1	63225710	63225711	pA:pas:M+645;pas:T+258;uc011wme.1.tx_end	0	+
chr1	63226227	63226228	pA:Mm.2718.1.12;pas:B+280;pas:K+353;pas:L+238;pas:M+647;pas:T+259	0	+
chr1	63226470	63226471	pA:pas:K+354;pas:L+239;pas:M+648;pas:M+649	0	+
chr1	63226551	63226552	pA:pas:L+240;pas:M+650	0	+
chr1	63227060	63227061	pA:pas:B+281;pas:M+651;uc007bfz.2.tx_end	0	+
chr1	63361150	63361151	pA:pas:B+282;pas:K+356;pas:M+654;uc007bgb.2.tx_end;uc007bgc.2.tx_end	0	+
chr1	63579422	63579423	pA:uc007bgd.1.tx_end	0	+
chr1	63615667	63615668	pA:uc007bge.1.tx_end	0	+
chr1	63619792	63619793	pA:uc007bgf.2.tx_end	0	+
chr1	63639489	63639490	pA:Mm.302274.1.18;pas:B+283;pas:L+241;pas:M+656;pas:T+260	0	+
chr1	63639564	63639565	pA:pas:B+284;pas:K+357	0	+
chr1	63640081	63640082	pA:pas:B+285;pas:B+286;pas:L+242;pas:M+658	0	+
chr1	63642676	63642677	pA:Mm.124892.1.1;pas:B+288;pas:L+243	0	+
chr1	63643088	63643089	pA:uc007bgg.1.tx_end;uc007bgh.1.tx_end;uc011wmf.1.tx_end	0	+
chr1	63782391	63782392	pA:Mm.30965.1.12	0	+
chr1	63782880	63782881	pA:uc007bgk.2.tx_end	0	+
chr1	63799046	63799047	pA:Mm.30965.1.31;pas:B+292;pas:K+358;pas:L+244;pas:M+659	0	+
chr1	63799960	63799961	pA:pas:B+293;pas:K+359;uc007bgl.2.tx_end	0	+
chr1	64015572	64015573	pA:uc007bgm.1.tx_end	0	+
chr1	64580252	64580253	pA:pas:B+295;pas:K+361;pas:L+245;pas:M+665;pas:T+263	0	+
chr1	64644507	64644508	pA:Mm.370176.1.19;pas:M+668;pas:T+265	0	+
chr1	64644852	64644853	pA:Mm.370176.1.20;pas:K+363;pas:M+669;pas:T+266	0	+
chr1	64647769	64647770	pA:Mm.1376.1.1	0	+
chr1	64648921	64648922	pA:pas:B+296;pas:K+364;pas:M+670	0	+
chr1	64649430	64649431	pA:pas:B+297;pas:K+365;pas:L+247;pas:M+672;pas:T+267	0	+
chr1	64649543	64649544	pA:pas:B+298;pas:K+366;pas:L+248;pas:M+673;pas:T+268	0	+
chr1	64651121	64651122	pA:Mm.351093.1.1;uc007bgr.1.tx_end;uc007bgs.1.tx_end;uc007bgt.1.tx_end;uc011wmg.1.tx_end	0	+
chr1	64664452	64664453	pA:pas:M+674;pas:T+269	0	+
chr1	64770782	64770783	pA:Mm.39706.1.5	0	+
chr1	64771881	64771882	pA:pas:B+300;pas:K+369;pas:M+677	0	+
chr1	64772218	64772219	pA:pas:K+370;pas:M+678;uc007bgx.1.tx_end	0	+
chr1	64981387	64981388	pA:pas:M+679;pas:T+271	0	+
chr1	65155989	65155990	pA:pas:B+301;pas:M+681	0	+
chr1	65239000	65239001	pA:pas:M+682;pas:T+274	0	+
chr1	65239052	65239053	pA:pas:L+249;pas:M+683	0	+
chr1	65252279	65252280	pA:uc007bho.1.tx_end	0	+
chr1	65252747	65252748	pA:uc007bhp.1.tx_end	0	+
chr1	65255993	65255994	pA:pas:K+371;pas:M+685;pas:T+275	0	+
chr1	65272690	65272691	pA:uc007bhq.1.tx_end	0	+
chr1	65279054	65279055	pA:uc007bhr.1.tx_end	0	+
chr1	65320588	65320589	pA:Mm.38370.1.24	0	+
chr1	65323373	65323374	pA:pas:B+302;pas:K+373;pas:L+250;pas:M+687	0	+
chr1	65325269	65325270	pA:pas:K+374;pas:M+689;uc007bhs.1.tx_end;uc007bht.1.tx_end	0	+
chr1	65435817	65435818	pA:uc007bhu.1.tx_end	0	+
chr1	65974879	65974880	pA:Mm.275362.1.6;uc007bhv.1.tx_end	0	+
chr1	66450704	66450705	pA:uc007bhy.1.tx_end	0	+
chr1	66452202	66452203	pA:pas:L+251;pas:M+695	0	+
chr1	66461120	66461121	pA:Mm.256966.1.14	0	+
chr1	66462720	66462721	pA:uc007bic.1.tx_end;uc007bie.1.tx_end	0	+
chr1	66489156	66489157	pA:Mm.256966.1.41;pas:B+309;pas:K+375;pas:T+276;uc007bhw.1.tx_end;uc007bhx.1.tx_end;uc007bhz.1.tx_end;uc007bia.1.tx_end;uc007bib.1.tx_end;uc007bid.1.tx_end	0	+
chr1	66532763	66532764	pA:uc007bif.2.tx_end	0	+
chr1	66551630	66551631	pA:uc011wmk.1.tx_end	0	+
chr1	66745721	66745722	pA:Mm.40059.1.1;pas:B+313;pas:K+376;pas:M+697;uc007bih.2.tx_end;uc007bii.2.tx_end	0	+
chr1	66748474	66748475	pA:pas:M+698;pas:T+277	0	+
chr1	66761820	66761821	pA:uc007bij.1.tx_end	0	+
chr1	66764824	66764825	pA:pas:K+377;pas:M+701	0	+
chr1	66764994	66764995	pA:pas:M+702;pas:T+278	0	+
chr1	66765250	66765251	pA:Mm.240912.1.14;pas:K+378;pas:M+703	0	+
chr1	66766085	66766086	pA:Mm.240912.1.15;pas:K+379;pas:L+252;pas:M+705	0	+
chr1	66766378	66766379	pA:uc007bik.1.tx_end;uc007bil.1.tx_end	0	+
chr1	66829531	66829532	pA:pas:B+314;pas:K+382;pas:M+711	0	+
chr1	67277021	67277022	pA:uc007biy.1.tx_end	0	+
chr1	67277358	67277359	pA:Mm.343942.1.32;pas:K+383;pas:L+258	0	+
chr1	67277836	67277837	pA:Mm.343942.1.35;uc007biz.1.tx_end	0	+
chr1	67370949	67370950	pA:uc007bja.1.tx_end	0	+
chr1	68744489	68744490	pA:pas:B+315;pas:M+725	0	+
chr1	69971508	69971509	pA:Mm.240189.1.5	0	+
chr1	69972815	69972816	pA:Mm.240189.1.6	0	+
chr1	70313850	70313851	pA:uc007bjg.1.tx_end	0	+
chr1	70428095	70428096	pA:Mm.240189.1.10	0	+
chr1	70771705	70771706	pA:Mm.240189.1.14;Mm.360614.1.1;uc007bjh.1.tx_end;uc007bji.1.tx_end	0	+
chr1	70778775	70778776	pA:uc007bjj.1.tx_end	0	+
chr1	70931970	70931971	pA:Mm.360649.1.8;uc007bjk.1.tx_end;uc011wmn.1.tx_end;uc011wmo.1.tx_end;uc011wmp.1.tx_end	0	+
chr1	71609771	71609772	pA:uc007bjr.2.tx_end	0	+
chr1	71619936	71619937	pA:uc007bjs.2.tx_end	0	+
chr1	71625977	71625978	pA:Mm.38010.1.32;pas:B+321;pas:K+385;pas:L+262;pas:M+730;pas:T+287;uc007bjt.2.tx_end	0	+
chr1	71626206	71626207	pA:Mm.38010.1.33;pas:B+322;pas:K+386;pas:L+263;pas:M+731	0	+
chr1	71704030	71704031	pA:uc007bke.1.tx_end	0	+
chr1	71709416	71709417	pA:uc007bkf.1.tx_end	0	+
chr1	71937777	71937778	pA:uc011wmr.1.tx_end;uc011wms.1.tx_end	0	+
chr1	72272910	72272911	pA:pas:M+735;pas:T+291	0	+
chr1	72272960	72272961	pA:pas:M+736;pas:T+292	0	+
chr1	72273016	72273017	pA:pas:K+388;pas:M+737;pas:T+293	0	+
chr1	72290985	72290986	pA:pas:M+738;pas:T+295	0	+
chr1	72301732	72301733	pA:pas:K+389;pas:M+742;pas:T+297	0	+
chr1	72301783	72301784	pA:pas:M+743;pas:T+298	0	+
chr1	72312709	72312710	pA:uc011wmt.1.tx_end	0	+
chr1	72318901	72318902	pA:Mm.255657.1.4	0	+
chr1	72321442	72321443	pA:uc007bkh.1.tx_end	0	+
chr1	72349568	72349569	pA:uc007bkk.1.tx_end	0	+
chr1	72349676	72349677	pA:pas:B+324;pas:K+390	0	+
chr1	72411034	72411035	pA:pas:B+325;pas:K+391;pas:L+271;pas:T+299	0	+
chr1	72441526	72441527	pA:Mm.246952.1.40;pas:K+392;pas:L+272;pas:M+747;pas:T+300;uc007bkl.2.tx_end	0	+
chr1	72638459	72638460	pA:pas:B+326;pas:K+393;pas:M+748;pas:T+301;uc007bko.2.tx_end	0	+
chr1	72642844	72642845	pA:uc007bkp.2.tx_end	0	+
chr1	72645972	72645973	pA:uc007bkq.2.tx_end	0	+
chr1	72673489	72673490	pA:uc007bkr.2.tx_end	0	+
chr1	72679744	72679745	pA:Mm.274232.1.41;pas:B+327;pas:K+394;pas:L+273;pas:M+749;pas:M+750;pas:T+303	0	+
chr1	72681871	72681872	pA:Mm.30971.1.1	0	+
chr1	72682257	72682258	pA:Mm.30971.1.2;pas:B+329;pas:B+330;pas:K+395	0	+
chr1	72682610	72682611	pA:Mm.30971.1.3	0	+
chr1	72683363	72683364	pA:uc007bks.2.tx_end	0	+
chr1	72760197	72760198	pA:Mm.379003.1.6;pas:B+332;pas:K+396;pas:L+274;pas:T+304	0	+
chr1	72760279	72760280	pA:pas:B+333;pas:K+397;pas:K+398;pas:L+275;pas:M+751;pas:T+305	0	+
chr1	72760388	72760389	pA:Mm.379003.1.8;pas:B+334;pas:K+399;pas:L+276;pas:M+752;pas:T+306;uc007bkv.2.tx_end	0	+
chr1	72899047	72899048	pA:Mm.141936.1.9;pas:B+335;pas:L+277;pas:T+307;uc007bkw.1.tx_end	0	+
chr1	72999315	72999316	pA:pas:K+400;pas:M+756	0	+
chr1	73007477	73007478	pA:uc007bky.1.tx_end	0	+
chr1	73072074	73072075	pA:uc007bla.1.tx_end	0	+
chr1	73078160	73078161	pA:pas:B+336;pas:M+757	0	+
chr1	73255829	73255830	pA:pas:K+401;pas:T+309	0	+
chr1	73411795	73411796	pA:pas:K+403;pas:M+763	0	+
chr1	73477357	73477358	pA:Mm.244075.1.1	0	+
chr1	73903411	73903412	pA:pas:K+405;pas:L+278	0	+
chr1	74194803	74194804	pA:uc007blk.2.tx_end;uc011wmy.1.tx_end	0	+
chr1	74207819	74207820	pA:uc007bll.1.tx_end	0	+
chr1	74314581	74314582	pA:pas:K+416;pas:M+769;pas:T+312	0	+
chr1	74314786	74314787	pA:Mm.337038.1.21;pas:B+338;pas:K+417;pas:L+282;pas:M+770;pas:T+313;uc007bln.1.tx_end;uc007blo.1.tx_end;uc007blp.1.tx_end	0	+
chr1	74326162	74326163	pA:uc007blq.1.tx_end	0	+
chr1	74332569	74332570	pA:pas:K+419;pas:T+315	0	+
chr1	74334026	74334027	pA:Mm.196604.1.6;pas:B+339;pas:K+421;pas:L+283;pas:M+772;pas:T+317;uc007bls.1.tx_end	0	+
chr1	74399449	74399450	pA:pas:B+340;pas:K+422	0	+
chr1	74400265	74400266	pA:Mm.196604.1.27;pas:B+341;pas:K+423;pas:L+284;pas:M+776;pas:T+318;uc007blt.1.tx_end;uc007blu.1.tx_end;uc007blw.1.tx_end	0	+
chr1	74415894	74415895	pA:uc007blx.1.tx_end;uc011wna.1.tx_end	0	+
chr1	74432624	74432625	pA:uc007bly.2.tx_end	0	+
chr1	74437392	74437393	pA:pas:B+342;pas:L+285;pas:M+779;pas:T+320	0	+
chr1	74440967	74440968	pA:uc007bma.2.tx_end	0	+
chr1	74442077	74442078	pA:Mm.165042.1.11;pas:M+781;pas:T+322	0	+
chr1	74442331	74442332	pA:pas:K+425;pas:M+782	0	+
chr1	74442436	74442437	pA:pas:K+426;pas:L+286;pas:M+783	0	+
chr1	74442562	74442563	pA:pas:K+427;pas:L+287;pas:M+784	0	+
chr1	74442723	74442724	pA:pas:M+785;pas:T+323	0	+
chr1	74443566	74443567	pA:Mm.165042.1.23;pas:B+343;pas:K+428;pas:L+288;pas:M+787;pas:T+325	0	+
chr1	74443858	74443859	pA:Mm.165042.1.24;pas:B+344;pas:K+429;pas:L+289;pas:L+290;pas:M+789;pas:T+327;uc007blz.2.tx_end	0	+
chr1	74481675	74481676	pA:pas:K+430;pas:M+791	0	+
chr1	74482091	74482092	pA:Mm.374802.1.28	0	+
chr1	74482133	74482134	pA:uc007bmb.2.tx_end	0	+
chr1	74576030	74576031	pA:Mm.291708.1.18;pas:B+347;pas:T+329	0	+
chr1	74576335	74576336	pA:Mm.291708.1.19	0	+
chr1	74577350	74577351	pA:Mm.291708.1.20	0	+
chr1	74577415	74577416	pA:Mm.291708.1.21;pas:B+348;pas:K+437;pas:L+292;pas:M+792;pas:T+330;uc007bmf.2.tx_end	0	+
chr1	74606925	74606926	pA:Mm.290731.1.8	0	+
chr1	74607179	74607180	pA:uc007bmi.1.tx_end	0	+
chr1	74612550	74612551	pA:Mm.290731.1.16;pas:B+349;pas:K+438;pas:M+794;pas:T+331;uc007bmg.1.tx_end;uc007bmh.1.tx_end;uc007bmj.1.tx_end;uc007bmk.1.tx_end;uc011wnb.1.tx_end	0	+
chr1	74638695	74638696	pA:Mm.358700.1.15;pas:B+351;pas:K+439;pas:L+293;pas:M+795;pas:T+332	0	+
chr1	74638773	74638774	pA:Mm.358700.1.16;pas:B+352;pas:K+440;pas:L+294;pas:M+796;pas:T+333	0	+
chr1	74639016	74639017	pA:pas:K+441;pas:L+295;pas:M+797;uc007bmq.1.tx_end;uc007bmr.1.tx_end	0	+
chr1	74652098	74652099	pA:Mm.310974.1.5	0	+
chr1	74681329	74681330	pA:uc007bmu.1.tx_end	0	+
chr1	74682620	74682621	pA:Mm.310974.1.30;Mm.380313.1.3;pas:B+353;pas:T+335	0	+
chr1	74683467	74683468	pA:Mm.310974.1.33;pas:B+354;pas:K+442;uc007bmv.1.tx_end;uc007bmw.1.tx_end;uc007bmx.1.tx_end;uc011wnc.1.tx_end	0	+
chr1	74733926	74733927	pA:Mm.260714.1.15	0	+
chr1	74744547	74744548	pA:Mm.260714.1.36;pas:K+443;pas:L+296;pas:M+803;pas:T+336;uc007bmy.1.tx_end;uc007bmz.1.tx_end	0	+
chr1	74746451	74746452	pA:Mm.260714.1.38	0	+
chr1	74748398	74748399	pA:pas:B+355;pas:K+444;pas:L+297;pas:M+804;pas:T+338	0	+
chr1	74784499	74784500	pA:Mm.85083.1.20;pas:K+445;pas:L+298;pas:M+805;pas:M+806;pas:T+340;uc007bna.1.tx_end	0	+
chr1	74784900	74784901	pA:pas:L+299;pas:M+807	0	+
chr1	74831519	74831520	pA:Mm.268282.1.8;pas:B+357;pas:K+446;pas:M+809;pas:T+341	0	+
chr1	74831892	74831893	pA:pas:B+358;pas:K+447;pas:M+810;uc007bne.1.tx_end	0	+
chr1	74850749	74850750	pA:Mm.5130.1.4;uc007bnf.2.tx_end	0	+
chr1	74851110	74851111	pA:pas:B+359;pas:K+449	0	+
chr1	74864691	74864692	pA:pas:B+360;pas:K+450;pas:M+811;pas:T+343	0	+
chr1	74872488	74872489	pA:pas:B+361;pas:K+451;pas:M+812;pas:T+344	0	+
chr1	74903715	74903716	pA:Mm.153833.1.1	0	+
chr1	74904003	74904004	pA:pas:B+364;pas:M+813	0	+
chr1	74904305	74904306	pA:uc007bng.2.tx_end	0	+
chr1	75144482	75144483	pA:Mm.273062.1.35;pas:B+367;pas:K+455;pas:L+300;pas:M+815;pas:T+346;uc007bnt.1.tx_end;uc007bnu.1.tx_end;uc007bnv.1.tx_end	0	+
chr1	75168199	75168200	pA:Mm.32646.1.19;pas:B+369;pas:K+456;pas:L+301;pas:M+816;pas:T+347;uc007bnw.2.tx_end;uc011wnf.1.tx_end;uc011wng.1.tx_end	0	+
chr1	75192112	75192113	pA:Mm.259326.1.7;pas:B+370;pas:K+457;pas:M+817;pas:T+348	0	+
chr1	75195961	75195962	pA:Mm.259326.1.26;pas:B+371;pas:K+459;pas:L+302;pas:M+818;pas:T+349;uc007bod.1.tx_end;uc007boe.1.tx_end;uc011wni.1.tx_end;uc011wnj.1.tx_end	0	+
chr1	75203965	75203966	pA:pas:K+460;pas:M+819	0	+
chr1	75208810	75208811	pA:Mm.17461.1.7;pas:B+372;pas:K+461;pas:L+304;pas:M+820;pas:T+350	0	+
chr1	75210816	75210817	pA:Mm.17461.1.23;pas:B+374;pas:K+462;pas:L+305;pas:M+821;pas:T+351	0	+
chr1	75212215	75212216	pA:pas:B+375;pas:K+463;pas:L+306;pas:M+822;pas:T+352;pas:T+353;uc007boh.2.tx_end;uc007boi.2.tx_end;uc007boj.1.tx_end	0	+
chr1	75213445	75213446	pA:pas:M+823;pas:T+355	0	+
chr1	75218803	75218804	pA:pas:B+376;pas:K+464;pas:L+307	0	+
chr1	75242266	75242267	pA:Mm.248776.1.23;pas:B+379;pas:K+466;pas:L+308;pas:M+824;pas:T+356;uc007bom.2.tx_end;uc007bon.2.tx_end;uc007boo.2.tx_end;uc007bop.2.tx_end;uc011wnm.1.tx_end	0	+
chr1	75245152	75245153	pA:pas:K+467;pas:L+309;pas:M+825	0	+
chr1	75282222	75282223	pA:Mm.362933.1.1	0	+
chr1	75364294	75364295	pA:Mm.6712.1.26;pas:B+383;pas:K+468;pas:L+311;pas:M+838;pas:T+357;uc007box.1.tx_end	0	+
chr1	75385678	75385679	pA:uc007bpb.1.tx_end	0	+
chr1	75401139	75401140	pA:Mm.275397.1.18;pas:B+384;pas:K+469;pas:L+312;pas:M+843;pas:T+358;uc007bpa.1.tx_end;uc011wnq.1.tx_end	0	+
chr1	75428894	75428895	pA:Mm.275397.1.29;pas:B+385;pas:K+470;pas:M+846;pas:T+359;uc007boz.1.tx_end;uc007bpc.1.tx_end	0	+
chr1	75439750	75439751	pA:pas:B+386;pas:K+471;pas:L+313;pas:M+847;pas:T+360;uc007bpd.1.tx_end;uc007bpe.1.tx_end;uc007bpf.1.tx_end	0	+
chr1	75470914	75470915	pA:Mm.110790.1.7;pas:B+388;pas:K+472;pas:M+848;uc007bpg.1.tx_end	0	+
chr1	75482267	75482268	pA:Mm.44401.1.6;pas:B+390;pas:K+473;pas:L+314;pas:M+849;pas:T+361;uc007bpl.2.tx_end;uc007bpm.2.tx_end	0	+
chr1	75506934	75506935	pA:Mm.1100.1.10;pas:B+391;pas:K+475;pas:M+851;uc007bps.1.tx_end	0	+
chr1	75533070	75533071	pA:Mm.312650.1.38;pas:B+392;pas:L+315;pas:M+852;pas:T+362	0	+
chr1	75533509	75533510	pA:Mm.312650.1.40;pas:B+393;pas:K+476;pas:L+316;pas:M+853;pas:T+363	0	+
chr1	75533911	75533912	pA:Mm.312650.1.41;pas:B+394;pas:T+364;uc007bpt.2.tx_end;uc007bpu.1.tx_end;uc011wnr.1.tx_end	0	+
chr1	75555657	75555658	pA:Mm.5053.1.40;pas:B+396;pas:K+478;pas:M+854;pas:T+365	0	+
chr1	75555809	75555810	pA:pas:B+397;pas:K+479	0	+
chr1	75556005	75556006	pA:uc007bpv.2.tx_end;uc007bpw.2.tx_end;uc007bpx.2.tx_end	0	+
chr1	75557936	75557937	pA:Mm.156715.1.1	0	+
chr1	76498602	76498603	pA:uc007bpy.1.tx_end;uc011wns.1.tx_end	0	+
chr1	78416863	78416864	pA:Mm.276248.1.5;pas:B+399;pas:K+482;uc007bqe.1.tx_end	0	+
chr1	78534747	78534748	pA:Mm.41325.1.10;pas:K+483;pas:M+864;uc007bql.2.tx_end;uc007bqm.2.tx_end	0	+
chr1	78603538	78603539	pA:uc007bqk.1.tx_end	0	+
chr1	78664175	78664176	pA:Mm.276016.1.2;pas:K+485;pas:M+866;pas:T+370;uc007bqn.2.tx_end;uc011wnv.1.tx_end	0	+
chr1	78668084	78668085	pA:pas:B+400;pas:K+486;pas:L+318;pas:M+867;pas:T+371	0	+
chr1	78703156	78703157	pA:pas:B+401;pas:L+319	0	+
chr1	78703370	78703371	pA:Mm.276016.1.47	0	+
chr1	78703559	78703560	pA:Mm.276016.1.49;pas:B+402;pas:K+487;pas:L+320;pas:M+868;pas:T+372	0	+
chr1	78704318	78704319	pA:pas:B+403;pas:L+321;pas:M+869;uc007bqo.2.tx_end;uc007bqp.2.tx_end;uc011wnu.1.tx_end	0	+
chr1	78816605	78816606	pA:Mm.24386.1.8;pas:B+404;pas:K+489;pas:M+870;uc007bqq.1.tx_end	0	+
chr1	79775120	79775121	pA:uc007bqx.1.tx_end	0	+
chr1	79778020	79778021	pA:Mm.238455.1.16;Mm.381371.1.1;pas:B+406;pas:K+493;pas:L+322;pas:M+871;pas:T+373;uc007bqy.1.tx_end	0	+
chr1	80476406	80476407	pA:pas:L+323;pas:M+878	0	+
chr1	80495743	80495744	pA:Mm.362926.1.1	0	+
chr1	81268225	81268226	pA:uc007brl.1.tx_end	0	+
chr1	81296670	81296671	pA:uc007brj.1.tx_end;uc007brk.1.tx_end;uc007brm.1.tx_end	0	+
chr1	81338338	81338339	pA:uc007brn.1.tx_end	0	+
chr1	82288870	82288871	pA:pas:B+409;pas:K+497;pas:M+886	0	+
chr1	82441940	82441941	pA:Mm.226994.1.17;pas:B+410;pas:K+498;pas:L+324;pas:M+890;pas:T+379;uc007brq.2.tx_end;uc007brr.1.tx_end	0	+
chr1	82444991	82444992	pA:pas:K+499;pas:L+325;pas:M+891	0	+
chr1	82497417	82497418	pA:pas:B+411;pas:M+893	0	+
chr1	82557204	82557205	pA:pas:K+500;pas:L+326;pas:M+896;pas:T+381	0	+
chr1	82639427	82639428	pA:uc007bru.1.tx_end	0	+
chr1	82718633	82718634	pA:uc007brv.1.tx_end	0	+
chr1	82738550	82738551	pA:uc007bsa.1.tx_end	0	+
chr1	82743716	82743717	pA:uc011woa.1.tx_end	0	+
chr1	82747178	82747179	pA:uc007bsb.1.tx_end	0	+
chr1	82748222	82748223	pA:pas:B+412;pas:M+900	0	+
chr1	82748354	82748355	pA:Mm.139176.1.17;pas:B+413;pas:K+508;pas:L+327;pas:M+901;pas:T+382	0	+
chr1	82748568	82748569	pA:Mm.139176.1.20	0	+
chr1	82748966	82748967	pA:Mm.139176.1.26;pas:B+414;pas:K+509;pas:L+328;pas:M+902;pas:T+383;uc007brx.1.tx_end;uc007bry.1.tx_end;uc007brz.1.tx_end;uc007bsc.1.tx_end	0	+
chr1	82794590	82794591	pA:pas:L+329;pas:M+903	0	+
chr1	82891698	82891699	pA:Mm.6461.1.22	0	+
chr1	82892082	82892083	pA:Mm.6461.1.28	0	+
chr1	82892246	82892247	pA:Mm.6461.1.31;pas:B+415;pas:K+510;pas:M+905;pas:M+906	0	+
chr1	82892849	82892850	pA:uc007bse.1.tx_end;uc007bsf.1.tx_end;uc007bsg.1.tx_end;uc007bsh.1.tx_end	0	+
chr1	82892955	82892956	pA:Mm.6461.1.34;pas:B+416;pas:K+511;pas:L+330;pas:M+907;pas:T+384	0	+
chr1	82897575	82897576	pA:Mm.360613.1.1;pas:B+417;pas:K+512;pas:M+908	0	+
chr1	83115741	83115742	pA:Mm.116739.1.7;uc007bsk.2.tx_end;uc007bsl.2.tx_end;uc007bsm.2.tx_end	0	+
chr1	83207148	83207149	pA:Mm.256482.1.10;uc007bsn.2.tx_end;uc007bso.2.tx_end;uc011wob.1.tx_end	0	+
chr1	83381646	83381647	pA:pas:B+418;pas:T+386	0	+
chr1	84844366	84844367	pA:pas:B+420;pas:K+515;pas:M+915;pas:T+391	0	+
chr1	84897061	84897062	pA:Mm.27888.1.9;Mm.381192.1.7;pas:B+421;pas:K+517;pas:L+331;pas:M+916;pas:T+392;uc007btc.2.tx_end	0	+
chr1	84936004	84936005	pA:pas:B+422;pas:T+393	0	+
chr1	84942051	84942052	pA:pas:B+423;pas:K+518;pas:M+917	0	+
chr1	84962738	84962739	pA:uc007bte.1.tx_end	0	+
chr1	85110609	85110610	pA:uc007btk.1.tx_end;uc007btl.1.tx_end;uc007btm.1.tx_end	0	+
chr1	85191189	85191190	pA:Mm.362126.1.1	0	+
chr1	85210336	85210337	pA:uc007btq.1.tx_end;uc007btr.1.tx_end	0	+
chr1	85211969	85211970	pA:uc007bts.1.tx_end	0	+
chr1	85257588	85257589	pA:uc007btp.1.tx_end	0	+
chr1	85272631	85272632	pA:uc007bto.1.tx_end	0	+
chr1	85339150	85339151	pA:uc007btv.1.tx_end	0	+
chr1	87447338	87447339	pA:uc007btw.1.tx_end	0	+
chr1	87448759	87448760	pA:uc007btx.1.tx_end;uc007bty.1.tx_end	0	+
chr1	87541610	87541611	pA:pas:K+522;pas:M+920;pas:T+395;uc007buc.1.tx_end	0	+
chr1	87579692	87579693	pA:pas:K+523;pas:M+921;pas:T+396;uc007bud.1.tx_end	0	+
chr1	87590883	87590884	pA:uc007bue.1.tx_end	0	+
chr1	87597723	87597724	pA:uc011woc.1.tx_end	0	+
chr1	87598146	87598147	pA:Mm.290906.1.24;pas:B+424;pas:K+524;pas:M+922;pas:T+397;uc007buf.1.tx_end;uc007bug.1.tx_end	0	+
chr1	87606022	87606023	pA:uc007buh.1.tx_end	0	+
chr1	87606486	87606487	pA:pas:K+525;pas:L+332;pas:M+925;pas:T+398	0	+
chr1	87606572	87606573	pA:Mm.290906.1.32;pas:K+526;pas:L+333;pas:M+926;pas:T+399;pas:T+400	0	+
chr1	87692047	87692048	pA:uc007bul.2.tx_end	0	+
chr1	87732065	87732066	pA:pas:K+527;pas:L+334;pas:M+928;pas:T+402	0	+
chr1	87746298	87746299	pA:pas:K+528;pas:M+929;pas:T+403	0	+
chr1	87746726	87746727	pA:Mm.26135.1.27;pas:B+425;pas:K+529;pas:L+335;pas:M+930	0	+
chr1	87748152	87748153	pA:Mm.26135.1.29;pas:B+426;pas:K+531;pas:L+336;pas:M+932;pas:T+404;uc007bum.2.tx_end;uc011woe.1.tx_end	0	+
chr1	87805272	87805273	pA:Mm.29870.1.18;pas:B+427;pas:K+532;pas:L+337;pas:M+936;pas:T+405;uc011wof.1.tx_end	0	+
chr1	87828330	87828331	pA:Mm.314965.1.3;pas:B+428;pas:M+938;uc007bup.2.tx_end	0	+
chr1	87901100	87901101	pA:pas:B+430;pas:K+534;pas:L+338;pas:M+940;pas:T+406	0	+
chr1	87915827	87915828	pA:pas:M+941;pas:T+407	0	+
chr1	87921243	87921244	pA:Mm.196313.1.4;uc007bur.2.tx_end;uc007bus.2.tx_end	0	+
chr1	87923752	87923753	pA:uc007buu.2.tx_end	0	+
chr1	87926532	87926533	pA:uc007but.2.tx_end;uc007buv.2.tx_end;uc007buw.2.tx_end	0	+
chr1	87951260	87951261	pA:Mm.54981.1.5	0	+
chr1	87952031	87952032	pA:Mm.54981.1.6;pas:B+431;pas:L+344;pas:M+942;uc007bux.2.tx_end;uc011wog.1.tx_end	0	+
chr1	88035869	88035870	pA:Mm.379264.1.5;pas:B+432;pas:K+535;pas:L+348;pas:M+943;pas:T+410;uc007buy.1.tx_end	0	+
chr1	88066905	88066906	pA:uc007bva.1.tx_end	0	+
chr1	88074275	88074276	pA:uc007bvb.1.tx_end	0	+
chr1	88109766	88109767	pA:uc007bvc.1.tx_end	0	+
chr1	88142900	88142901	pA:uc007bvd.1.tx_end	0	+
chr1	88145115	88145116	pA:pas:K+540;pas:L+349;pas:T+412	0	+
chr1	88149067	88149068	pA:Mm.379264.1.33;pas:B+435;pas:L+350;uc007bve.1.tx_end;uc007bvj.1.tx_end	0	+
chr1	88154263	88154264	pA:Mm.379264.1.38;Mm.379264.1.39;pas:B+436;pas:K+541;pas:B+437;pas:K+542;pas:L+351	0	+
chr1	88156401	88156402	pA:uc007bvf.1.tx_end	0	+
chr1	88174858	88174859	pA:Mm.379264.1.49;uc007bvg.1.tx_end;uc007bvh.1.tx_end;uc007bvi.1.tx_end	0	+
chr1	88203879	88203880	pA:Mm.86467.1.14;uc007bvk.2.tx_end	0	+
chr1	88247447	88247448	pA:pas:M+950;pas:T+414	0	+
chr1	88256536	88256537	pA:pas:B+438;pas:K+545;pas:L+352;pas:M+951;pas:T+416	0	+
chr1	88264538	88264539	pA:uc011woj.1.tx_end	0	+
chr1	88270366	88270367	pA:pas:B+439;pas:M+954;pas:T+417	0	+
chr1	88313355	88313356	pA:pas:B+440;pas:B+441;pas:T+419	0	+
chr1	88324623	88324624	pA:uc007bvo.2.tx_end	0	+
chr1	88384767	88384768	pA:pas:B+443;pas:K+546;pas:M+958	0	+
chr1	88384905	88384906	pA:pas:K+547;pas:L+353;pas:M+959;pas:T+425	0	+
chr1	88425754	88425755	pA:Mm.19187.1.1	0	+
chr1	88426065	88426066	pA:Mm.19187.1.4	0	+
chr1	88427283	88427284	pA:Mm.19187.1.13;pas:B+444;pas:K+548;pas:L+354;pas:M+962;pas:T+432;uc007bvp.1.tx_end	0	+
chr1	88496359	88496360	pA:pas:B+445;pas:M+963	0	+
chr1	88502838	88502839	pA:Mm.12973.1.22;pas:B+446;pas:M+964	0	+
chr1	88503074	88503075	pA:uc007bvr.1.tx_end;uc007bvs.1.tx_end	0	+
chr1	88503239	88503240	pA:pas:K+550;pas:M+966;pas:T+434	0	+
chr1	88503402	88503403	pA:pas:B+447;pas:K+551;pas:L+355;pas:M+967;pas:T+435	0	+
chr1	88641986	88641987	pA:Mm.337184.1.2	0	+
chr1	88776610	88776611	pA:uc011wol.1.tx_end	0	+
chr1	88945769	88945770	pA:uc007bvu.2.tx_end	0	+
chr1	88946671	88946672	pA:Mm.337184.1.39;pas:B+449;pas:K+553;pas:L+357;pas:M+971;pas:T+436;uc007bvv.2.tx_end;uc007bvw.2.tx_end	0	+
chr1	88992992	88992993	pA:uc007bvx.1.tx_end	0	+
chr1	89023721	89023722	pA:uc011wom.1.tx_end	0	+
chr1	89024486	89024487	pA:uc007bwb.1.tx_end	0	+
chr1	89043787	89043788	pA:pas:B+450;pas:K+554;pas:L+359;pas:M+973;pas:T+437	0	+
chr1	89084977	89084978	pA:uc007bwe.1.tx_end	0	+
chr1	89088498	89088499	pA:pas:M+974;pas:T+438	0	+
chr1	89096644	89096645	pA:Mm.2811.1.9;uc007bwf.1.tx_end;uc007bwg.1.tx_end	0	+
chr1	89105169	89105170	pA:uc007bwi.1.tx_end	0	+
chr1	89108209	89108210	pA:Mm.2810.1.16	0	+
chr1	89108409	89108410	pA:uc007bwh.1.tx_end	0	+
chr1	89123181	89123182	pA:pas:K+555;pas:L+360;pas:M+977;pas:T+440;uc007bwj.1.tx_end;uc007bwm.1.tx_end	0	+
chr1	89124636	89124637	pA:Mm.227183.1.21;pas:B+452;pas:K+556;pas:L+361;pas:M+978;pas:T+441	0	+
chr1	89125432	89125433	pA:pas:K+557;pas:T+442;uc007bwk.1.tx_end;uc007bwn.1.tx_end	0	+
chr1	89131285	89131286	pA:Mm.227183.1.23	0	+
chr1	89134465	89134466	pA:pas:B+453;pas:K+558;pas:L+362;pas:M+979	0	+
chr1	89134986	89134987	pA:pas:B+454;pas:K+559;pas:L+363;pas:M+980;pas:T+443	0	+
chr1	89135317	89135318	pA:Mm.227183.1.34;pas:B+455;pas:K+560;pas:L+364;pas:M+981;pas:T+444	0	+
chr1	89136825	89136826	pA:pas:B+456;pas:K+561;pas:L+365;pas:M+982;pas:T+445	0	+
chr1	89137062	89137063	pA:uc007bwl.1.tx_end	0	+
chr1	89207365	89207366	pA:pas:B+457;pas:K+562;pas:M+984;pas:T+446;uc007bwo.1.tx_end	0	+
chr1	89207413	89207414	pA:Mm.247951.1.13;pas:B+458;pas:K+563;pas:M+985;pas:T+447	0	+
chr1	89225581	89225582	pA:Mm.23065.1.1	0	+
chr1	89252296	89252297	pA:pas:K+564;pas:M+986;uc007bwp.2.tx_end	0	+
chr1	89252790	89252791	pA:pas:K+565;pas:M+987	0	+
chr1	89254270	89254271	pA:Mm.23065.1.14;pas:K+566;pas:M+988	0	+
chr1	89254358	89254359	pA:uc007bwq.2.tx_end	0	+
chr1	89315753	89315754	pA:uc007bwv.1.tx_end	0	+
chr1	89321800	89321801	pA:uc011won.1.tx_end	0	+
chr1	89330364	89330365	pA:Mm.23065.1.50	0	+
chr1	89330490	89330491	pA:uc007bws.2.tx_end	0	+
chr1	89345833	89345834	pA:pas:M+991;pas:T+448	0	+
chr1	89346646	89346647	pA:Mm.23065.1.71	0	+
chr1	89347245	89347246	pA:pas:B+461;pas:K+567	0	+
chr1	89347384	89347385	pA:Mm.23065.1.72;pas:B+462;pas:K+568;pas:L+367;pas:M+992;pas:T+449;uc007bwr.2.tx_end;uc007bwt.2.tx_end	0	+
chr1	89352508	89352509	pA:pas:K+569;pas:L+368;pas:M+993	0	+
chr1	89372055	89372056	pA:Mm.7310.1.6;uc007bww.2.tx_end;uc011woo.1.tx_end	0	+
chr1	89494414	89494415	pA:Mm.45670.1.6;pas:B+463;pas:K+572;pas:L+369;pas:M+996;pas:T+450;uc007bwz.2.tx_end;uc007bxa.2.tx_end;uc007bxb.2.tx_end;uc011wop.1.tx_end;uc011woq.1.tx_end	0	+
chr1	89616286	89616287	pA:Mm.15105.1.26;pas:K+573;pas:M+1000;pas:T+452	0	+
chr1	89617082	89617083	pA:Mm.15105.1.27;pas:B+464;pas:K+574;pas:L+370;pas:M+1001;pas:T+453;uc007bxc.2.tx_end;uc007bxd.2.tx_end;uc007bxe.2.tx_end;uc007bxf.2.tx_end;uc007bxg.2.tx_end;uc007bxh.2.tx_end	0	+
chr1	89664557	89664558	pA:uc007bxi.1.tx_end	0	+
chr1	89665974	89665975	pA:uc007bxj.1.tx_end	0	+
chr1	89673707	89673708	pA:pas:B+465;pas:L+372	0	+
chr1	89673768	89673769	pA:pas:L+373;pas:M+1002	0	+
chr1	89681392	89681393	pA:uc011wor.1.tx_end	0	+
chr1	89682920	89682921	pA:uc007bxk.1.tx_end	0	+
chr1	89685123	89685124	pA:Mm.272972.1.20;uc007bxo.1.tx_end	0	+
chr1	89688996	89688997	pA:Mm.272972.1.30;pas:B+467;pas:K+575;pas:L+374;pas:M+1003;pas:T+454;uc007bxl.1.tx_end;uc007bxm.1.tx_end;uc007bxn.1.tx_end	0	+
chr1	89711414	89711415	pA:Mm.1276.1.7	0	+
chr1	89721273	89721274	pA:Mm.1276.1.15	0	+
chr1	89721329	89721330	pA:Mm.1276.1.16	0	+
chr1	89721874	89721875	pA:uc007bxp.1.tx_end	0	+
chr1	89731974	89731975	pA:uc007bxq.1.tx_end;uc007bxr.1.tx_end	0	+
chr1	89741731	89741732	pA:Mm.1276.1.30;uc007bxs.1.tx_end	0	+
chr1	89818545	89818546	pA:pas:K+577;pas:M+1005	0	+
chr1	89841063	89841064	pA:Mm.277217.1.60;pas:B+468;pas:K+578;pas:L+376;pas:M+1007;pas:T+456;uc007bxu.2.tx_end;uc007bxv.2.tx_end;uc011wos.1.tx_end	0	+
chr1	89841755	89841756	pA:pas:B+469;pas:K+579;pas:M+1008;pas:T+457	0	+
chr1	89841965	89841966	pA:Mm.277217.1.63	0	+
chr1	90113977	90113978	pA:uc007bye.1.tx_end	0	+
chr1	90115577	90115578	pA:Mm.300095.1.38;pas:B+471;pas:K+582;pas:L+381;pas:M+1011;pas:T+458	0	+
chr1	90116576	90116577	pA:uc007bya.1.tx_end;uc007byb.1.tx_end;uc007byc.1.tx_end;uc007byd.2.tx_end;uc007byf.1.tx_end;uc007byg.1.tx_end;uc007byh.1.tx_end;uc007byi.1.tx_end;uc007byk.1.tx_end	0	+
chr1	90156746	90156747	pA:pas:L+382;pas:M+1012;pas:M+1013;pas:T+459	0	+
chr1	90158863	90158864	pA:uc011wov.1.tx_end	0	+
chr1	90257300	90257301	pA:uc011wox.1.tx_end	0	+
chr1	90285425	90285426	pA:Mm.218753.1.3;uc011woy.1.tx_end	0	+
chr1	90323012	90323013	pA:Mm.173058.1.10;pas:K+584;pas:L+384;uc007byq.1.tx_end	0	+
chr1	90458741	90458742	pA:uc007bys.1.tx_end	0	+
chr1	90652307	90652308	pA:uc007byu.1.tx_end	0	+
chr1	91050367	91050368	pA:Mm.170983.1.25;pas:K+588;pas:M+1018;pas:T+464;uc007byv.1.tx_end	0	+
chr1	91051528	91051529	pA:Mm.170983.1.26	0	+
chr1	91051642	91051643	pA:Mm.170983.1.27	0	+
chr1	91051791	91051792	pA:pas:B+472;pas:M+1019	0	+
chr1	91731162	91731163	pA:uc011wpa.1.tx_end	0	+
chr1	91786333	91786334	pA:Mm.291135.1.25;pas:K+592;pas:M+1021;pas:T+467	0	+
chr1	91786575	91786576	pA:Mm.291135.1.27;Mm.291135.1.28;pas:B+473;pas:K+593;pas:M+1022	0	+
chr1	91787532	91787533	pA:pas:B+474;pas:K+594;pas:M+1023	0	+
chr1	91791859	91791860	pA:pas:B+475;pas:K+595;pas:L+387;pas:M+1024;pas:T+468;uc007byw.1.tx_end;uc007byx.1.tx_end;uc007byy.1.tx_end	0	+
chr1	91828436	91828437	pA:uc007bzc.1.tx_end	0	+
chr1	92112083	92112084	pA:pas:K+597;pas:M+1026	0	+
chr1	92112302	92112303	pA:Mm.6522.1.10;pas:K+598;pas:M+1027	0	+
chr1	92112862	92112863	pA:uc007bzh.1.tx_end	0	+
chr1	92187482	92187483	pA:pas:K+599;pas:M+1028	0	+
chr1	92509698	92509699	pA:Mm.119177.1.20;pas:B+479;pas:K+603;pas:L+388;pas:M+1032;pas:T+469	0	+
chr1	92509915	92509916	pA:Mm.119177.1.22;pas:B+480;pas:K+604;pas:L+389;pas:M+1033;pas:T+470;uc007bzi.1.tx_end	0	+
chr1	92839216	92839217	pA:pas:K+605;pas:M+1039	0	+
chr1	92845482	92845483	pA:pas:K+606;pas:T+471	0	+
chr1	92846201	92846202	pA:Mm.105208.1.22;pas:K+607;pas:M+1040	0	+
chr1	92847718	92847719	pA:Mm.105208.1.23;pas:K+608;pas:L+390;pas:M+1041;pas:T+472;uc007bzm.2.tx_end	0	+
chr1	92850588	92850589	pA:uc011wpd.1.tx_end	0	+
chr1	93005248	93005249	pA:uc007bzp.2.tx_end	0	+
chr1	93013733	93013734	pA:pas:K+611;pas:M+1046	0	+
chr1	93013898	93013899	pA:pas:K+612;pas:L+391;pas:M+1047;uc007bzr.2.tx_end;uc007bzu.2.tx_end	0	+
chr1	93025520	93025521	pA:Mm.45039.1.29;pas:B+481;pas:K+613;pas:L+392;pas:M+1049;pas:T+474;uc007bzq.2.tx_end;uc007bzs.2.tx_end;uc007bzt.2.tx_end;uc011wpe.1.tx_end	0	+
chr1	93067371	93067372	pA:uc007bzv.1.tx_end	0	+
chr1	93103366	93103367	pA:Mm.3272.1.3;uc007bzw.2.tx_end;uc011wpf.1.tx_end	0	+
chr1	93103686	93103687	pA:pas:B+482;pas:T+475	0	+
chr1	93120254	93120255	pA:Mm.3272.1.9;pas:B+483;pas:K+615;pas:M+1050;pas:T+476	0	+
chr1	93120298	93120299	pA:Mm.3272.1.10	0	+
chr1	93121777	93121778	pA:pas:M+1051;pas:T+477;uc007bzx.2.tx_end	0	+
chr1	93159006	93159007	pA:pas:K+616;pas:M+1052	0	+
chr1	93182184	93182185	pA:pas:K+617;pas:L+394;pas:L+395;pas:M+1053;pas:M+1054;pas:T+478;pas:T+479	0	+
chr1	93182239	93182240	pA:pas:K+618;pas:M+1055	0	+
chr1	93182358	93182359	pA:pas:B+484;pas:K+619;pas:L+396;pas:M+1056;pas:T+480	0	+
chr1	93182534	93182535	pA:Mm.337238.1.21;Mm.337238.1.22;pas:B+485;pas:K+620;pas:L+397;pas:M+1058;pas:T+481	0	+
chr1	93182601	93182602	pA:uc007bzy.1.tx_end;uc007bzz.1.tx_end;uc007caa.1.tx_end;uc007cab.1.tx_end;uc007cac.1.tx_end	0	+
chr1	93183097	93183098	pA:pas:B+486;pas:K+622;pas:L+398;pas:M+1059;pas:T+482	0	+
chr1	93185453	93185454	pA:pas:B+487;pas:K+623;pas:L+399;pas:M+1062	0	+
chr1	93186914	93186915	pA:pas:K+624;pas:L+400	0	+
chr1	93202030	93202031	pA:uc007cad.1.tx_end;uc007cag.1.tx_end	0	+
chr1	93207906	93207907	pA:uc007cae.1.tx_end	0	+
chr1	93217656	93217657	pA:Mm.25724.1.27;pas:B+488;pas:K+625;pas:L+402;pas:M+1065;pas:T+484;uc007caf.1.tx_end	0	+
chr1	93244879	93244880	pA:uc007cah.1.tx_end	0	+
chr1	93245982	93245983	pA:pas:B+489;pas:T+486	0	+
chr1	93258982	93258983	pA:Mm.68617.1.11;pas:M+1068;pas:T+487;uc007cai.1.tx_end	0	+
chr1	93270793	93270794	pA:Mm.256795.1.4;pas:K+627;pas:M+1069;pas:T+488;uc007caj.1.tx_end	0	+
chr1	93397858	93397859	pA:Mm.318430.1.3	0	+
chr1	93423297	93423298	pA:pas:B+491;pas:M+1072	0	+
chr1	93424547	93424548	pA:pas:B+492;pas:K+632;pas:L+403;pas:M+1073	0	+
chr1	93425883	93425884	pA:Mm.318430.1.14;pas:K+633;pas:L+404;pas:M+1074;pas:T+489;uc007cax.2.tx_end;uc007cay.2.tx_end	0	+
chr1	93441277	93441278	pA:pas:B+494;pas:M+1075;pas:T+490	0	+
chr1	93449355	93449356	pA:Mm.234152.1.12;uc007cbb.2.tx_end	0	+
chr1	93451693	93451694	pA:Mm.234152.1.16;pas:B+495;pas:L+407;pas:M+1076;pas:T+491	0	+
chr1	93455547	93455548	pA:Mm.234152.1.17;pas:B+496;pas:T+492	0	+
chr1	93456166	93456167	pA:Mm.234152.1.18;pas:B+497;pas:K+634;pas:L+408;pas:M+1078;pas:T+493;uc007caz.1.tx_end;uc007cba.1.tx_end;uc007cbc.1.tx_end	0	+
chr1	93744603	93744604	pA:pas:K+635;pas:M+1080;pas:T+494;uc007cbd.1.tx_end	0	+
chr1	94470782	94470783	pA:uc007cbl.2.tx_end	0	+
chr1	94485873	94485874	pA:uc007cbm.1.tx_end	0	+
chr1	94494068	94494069	pA:uc007cbn.1.tx_end	0	+
chr1	94505383	94505384	pA:uc007cbo.1.tx_end	0	+
chr1	94517577	94517578	pA:uc007cbp.2.tx_end	0	+
chr1	94732363	94732364	pA:pas:M+1087;pas:T+499	0	+
chr1	94747019	94747020	pA:uc011wpk.1.tx_end	0	+
chr1	94756786	94756787	pA:Mm.297976.1.35;pas:B+499;pas:K+636;pas:M+1088;pas:T+500;uc007cbs.1.tx_end	0	+
chr1	94805015	94805016	pA:Mm.46179.1.7;pas:B+500;pas:K+637;pas:L+409;pas:M+1090;pas:T+501	0	+
chr1	94805196	94805197	pA:uc007cbu.1.tx_end	0	+
chr1	94816805	94816806	pA:pas:L+410;pas:T+502	0	+
chr1	94817161	94817162	pA:Mm.200971.1.33;pas:B+501;pas:K+638;pas:L+411;pas:M+1091;pas:T+504;uc007cbw.2.tx_end	0	+
chr1	94817417	94817418	pA:Mm.200971.1.34;pas:K+639;pas:L+412;pas:M+1092;pas:T+505	0	+
chr1	94820969	94820970	pA:Mm.102425.1.1;pas:B+502;pas:K+640;pas:L+413;pas:M+1093;pas:T+507;uc011wpm.1.tx_end	0	+
chr1	94822952	94822953	pA:pas:M+1094;pas:T+508	0	+
chr1	94823518	94823519	pA:pas:B+503;pas:K+641;pas:L+414;pas:M+1095;pas:T+509	0	+
chr1	94837450	94837451	pA:pas:K+642;pas:M+1099;pas:T+510	0	+
chr1	94837548	94837549	pA:pas:B+504;pas:K+643;pas:L+415;pas:M+1100;pas:T+511;uc007cbx.1.tx_end	0	+
chr1	94844524	94844525	pA:Mm.294315.1.27;pas:K+644;pas:L+416;pas:M+1101;pas:T+512;uc007cby.1.tx_end	0	+
chr1	94851950	94851951	pA:pas:K+645;pas:L+418	0	+
chr1	94881620	94881621	pA:Mm.152780.1.10;pas:K+646;pas:L+419;pas:M+1102;pas:T+514	0	+
chr1	94882967	94882968	pA:uc007cbz.2.tx_end;uc007cca.2.tx_end;uc007ccb.2.tx_end	0	+
chr1	94908846	94908847	pA:Mm.235537.1.3;pas:K+647;pas:L+420;pas:T+515;uc007cdc.2.tx_end;uc007cdd.2.tx_end	0	+
chr1	95041997	95041998	pA:Mm.7457.1.20;pas:B+506;pas:K+649;pas:L+421;pas:M+1103;pas:T+516;uc007cdi.1.tx_end	0	+
chr1	95127648	95127649	pA:uc007cdl.1.tx_end	0	+
chr1	95174046	95174047	pA:uc007cdn.1.tx_end	0	+
chr1	95193024	95193025	pA:uc007cdm.1.tx_end	0	+
chr1	95197641	95197642	pA:Mm.271897.1.17;pas:B+507;pas:K+653;pas:L+423;pas:M+1105	0	+
chr1	95261841	95261842	pA:Mm.88704.1.17;pas:B+508;pas:B+509;pas:K+654;pas:M+1108;pas:T+517	0	+
chr1	95261883	95261884	pA:Mm.88704.1.18	0	+
chr1	95262118	95262119	pA:Mm.88704.1.20;pas:B+510;pas:M+1109	0	+
chr1	95263849	95263850	pA:Mm.88704.1.23	0	+
chr1	95264196	95264197	pA:Mm.88704.1.25;pas:K+655;pas:L+424;pas:M+1110;pas:T+518;uc007cdv.1.tx_end	0	+
chr1	95265648	95265649	pA:pas:L+425;pas:M+1111	0	+
chr1	95268761	95268762	pA:pas:B+511;pas:K+657;pas:M+1112;pas:T+519	0	+
chr1	95270068	95270069	pA:Mm.23078.1.1;pas:B+512;pas:M+1113	0	+
chr1	95300078	95300079	pA:uc007cdw.1.tx_end	0	+
chr1	95300879	95300880	pA:Mm.127010.1.1;pas:B+513;pas:M+1114;pas:T+520	0	+
chr1	95392868	95392869	pA:pas:B+514;pas:M+1115	0	+
chr1	95406310	95406311	pA:Mm.242324.1.22;Mm.370899.1.1;pas:K+658;pas:L+426;pas:M+1117;pas:T+521;uc007cea.2.tx_end;uc011wpo.1.tx_end;uc011wpp.1.tx_end;uc011wpq.1.tx_end	0	+
chr1	95406833	95406834	pA:pas:K+659;pas:L+427;pas:M+1118	0	+
chr1	95477872	95477873	pA:Mm.243091.1.14;uc007ceb.2.tx_end	0	+
chr1	95489871	95489872	pA:pas:B+515;pas:K+660;pas:L+428;pas:M+1119	0	+
chr1	95518361	95518362	pA:pas:B+516;pas:K+661;pas:L+430;pas:M+1120;pas:T+522	0	+
chr1	95518552	95518553	pA:pas:K+662;pas:L+431;pas:M+1121;uc007cec.2.tx_end	0	+
chr1	95518601	95518602	pA:Mm.243091.1.28	0	+
chr1	95520677	95520678	pA:pas:K+663;pas:M+1122	0	+
chr1	95592340	95592341	pA:Mm.3295.1.15;pas:B+518;pas:K+664;pas:L+432;pas:M+1123;pas:T+523;uc007cee.1.tx_end	0	+
chr1	95647648	95647649	pA:uc007cei.1.tx_end	0	+
chr1	95684767	95684768	pA:Mm.29087.1.27;pas:M+1125;pas:T+525	0	+
chr1	95686010	95686011	pA:Mm.29087.1.28;pas:B+519;pas:K+666;pas:L+433;pas:M+1126;pas:T+526	0	+
chr1	95686105	95686106	pA:uc007cej.1.tx_end	0	+
chr1	95687179	95687180	pA:Mm.376259.1.1	0	+
chr1	95715014	95715015	pA:Mm.64065.1.8	0	+
chr1	95718677	95718678	pA:Mm.64065.1.14;uc007cen.1.tx_end;uc011wpr.1.tx_end	0	+
chr1	95734659	95734660	pA:uc011wps.1.tx_end	0	+
chr1	95747942	95747943	pA:pas:K+668;pas:T+528	0	+
chr1	95748615	95748616	pA:pas:B+520;pas:K+670;pas:L+434;pas:M+1130;pas:T+529	0	+
chr1	95748750	95748751	pA:uc007ceo.2.tx_end;uc007cep.2.tx_end	0	+
chr1	95748937	95748938	pA:pas:K+671;pas:L+436;pas:M+1131	0	+
chr1	95773073	95773074	pA:pas:B+521;pas:K+672;pas:L+438;pas:M+1132;pas:T+530;uc007ces.1.tx_end	0	+
chr1	95814695	95814696	pA:uc007ceq.2.tx_end;uc007cer.2.tx_end	0	+
chr1	95814882	95814883	pA:pas:M+1141;pas:T+532	0	+
chr1	95816380	95816381	pA:pas:B+522;pas:K+673;pas:L+439;pas:M+1142;pas:T+533	0	+
chr1	95821526	95821527	pA:pas:M+1143;pas:T+535	0	+
chr1	95839223	95839224	pA:pas:M+1144;pas:T+536	0	+
chr1	95908115	95908116	pA:uc007cet.1.tx_end	0	+
chr1	95922187	95922188	pA:Mm.214565.1.9	0	+
chr1	95922702	95922703	pA:pas:B+524;pas:M+1146	0	+
chr1	95924906	95924907	pA:uc007ceu.1.tx_end;uc011wpt.1.tx_end	0	+
chr1	96699048	96699049	pA:uc007cew.1.tx_end	0	+
chr1	97210831	97210832	pA:Mm.272705.1.1	0	+
chr1	97224521	97224522	pA:uc007cex.2.tx_end	0	+
chr1	97230969	97230970	pA:Mm.272705.1.10;Mm.272705.1.9;pas:B+527;pas:K+675;pas:L+442;pas:M+1153;pas:T+538	0	+
chr1	97231050	97231051	pA:Mm.272705.1.12;pas:B+528;pas:K+676;pas:M+1154;pas:T+539	0	+
chr1	97231106	97231107	pA:pas:K+677;pas:M+1155;pas:T+540	0	+
chr1	97231644	97231645	pA:pas:B+529;pas:M+1156	0	+
chr1	97231860	97231861	pA:uc007cey.2.tx_end	0	+
chr1	97236150	97236151	pA:pas:L+443;pas:M+1158	0	+
chr1	98135574	98135575	pA:pas:K+678;pas:T+542	0	+
chr1	98279438	98279439	pA:pas:K+679;pas:T+543	0	+
chr1	98777810	98777811	pA:Mm.108566.1.4;uc007cfd.1.tx_end	0	+
chr1	99667401	99667402	pA:pas:B+532;pas:K+680;pas:M+1175;pas:T+546	0	+
chr1	99674467	99674468	pA:Mm.86090.1.9;pas:K+682;pas:M+1177	0	+
chr1	99674715	99674716	pA:uc007cfm.1.tx_end	0	+
chr1	99681644	99681645	pA:Mm.86090.1.17	0	+
chr1	99689344	99689345	pA:Mm.86090.1.21;pas:K+684;pas:M+1178	0	+
chr1	99689433	99689434	pA:Mm.86090.1.22	0	+
chr1	99689550	99689551	pA:pas:K+685;pas:L+446;uc007cfn.1.tx_end;uc011wpx.1.tx_end	0	+
chr1	100041231	100041232	pA:uc007cft.1.tx_end	0	+
chr1	100087274	100087275	pA:Mm.320863.1.2	0	+
chr1	100405956	100405957	pA:uc007cfu.2.tx_end;uc007cfv.2.tx_end	0	+
chr1	100413564	100413565	pA:uc007cfw.2.tx_end	0	+
chr1	100662389	100662390	pA:uc007cfx.1.tx_end	0	+
chr1	100979458	100979459	pA:Mm.363046.1.1	0	+
chr1	101086947	101086948	pA:Mm.337310.1.1	0	+
chr1	101211657	101211658	pA:pas:M+1192;pas:T+551	0	+
chr1	101631920	101631921	pA:pas:K+688;pas:L+448;pas:T+553	0	+
chr1	102382518	102382519	pA:uc007cfy.1.tx_end;uc007cfz.1.tx_end	0	+
chr1	103071722	103071723	pA:uc007cgb.1.tx_end	0	+
chr1	106826690	106826691	pA:pas:K+691;pas:L+454;pas:M+1214	0	+
chr1	106891255	106891256	pA:Mm.103640.1.7	0	+
chr1	106892057	106892058	pA:uc007cgc.1.tx_end	0	+
chr1	107042637	107042638	pA:pas:K+694;pas:L+455	0	+
chr1	107258206	107258207	pA:uc007cge.1.tx_end	0	+
chr1	107561726	107561727	pA:uc007cgi.2.tx_end	0	+
chr1	107577985	107577986	pA:Mm.337339.1.5	0	+
chr1	107633820	107633821	pA:uc007cgj.2.tx_end	0	+
chr1	107651707	107651708	pA:Mm.337339.1.48;pas:B+543;pas:K+696;pas:L+456;pas:M+1217;pas:T+559;uc007cgk.2.tx_end;uc007cgl.2.tx_end;uc007cgm.2.tx_end;uc007cgn.2.tx_end	0	+
chr1	107651767	107651768	pA:Mm.337339.1.49	0	+
chr1	107710979	107710980	pA:Mm.6251.1.3;uc007cgo.1.tx_end	0	+
chr1	107744158	107744159	pA:pas:B+544;pas:K+697;pas:M+1219	0	+
chr1	107744557	107744558	pA:uc007cgp.1.tx_end	0	+
chr1	107747829	107747830	pA:pas:K+699;pas:M+1220	0	+
chr1	107889615	107889616	pA:pas:K+701;pas:T+561	0	+
chr1	107929024	107929025	pA:Mm.210188.1.14;Mm.210188.1.15	0	+
chr1	107929090	107929091	pA:Mm.210188.1.16	0	+
chr1	107930653	107930654	pA:Mm.210188.1.18;pas:B+545;pas:K+702;pas:L+458;pas:M+1222;uc007cgq.2.tx_end;uc007cgr.2.tx_end;uc007cgs.2.tx_end;uc007cgt.2.tx_end	0	+
chr1	108049563	108049564	pA:pas:B+546;pas:L+459;pas:M+1224;pas:T+562	0	+
chr1	108183982	108183983	pA:uc007cgu.2.tx_end	0	+
chr1	108283055	108283056	pA:Mm.24115.1.19	0	+
chr1	108290229	108290230	pA:Mm.24115.1.30	0	+
chr1	108290823	108290824	pA:Mm.24115.1.31;pas:B+547;pas:K+706;pas:L+460;pas:M+1227;pas:T+563;uc007cgv.2.tx_end	0	+
chr1	108471622	108471623	pA:pas:K+707;pas:T+564;uc007cgx.1.tx_end	0	+
chr1	108778683	108778684	pA:Mm.268618.1.16;pas:M+1233;pas:T+566	0	+
chr1	108779924	108779925	pA:Mm.268618.1.17;uc007cha.1.tx_end;uc007chb.1.tx_end;uc011wqc.1.tx_end	0	+
chr1	108847034	108847035	pA:uc007chd.2.tx_end	0	+
chr1	108853656	108853657	pA:Mm.321740.1.11;uc007chc.2.tx_end;uc007che.2.tx_end	0	+
chr1	108897771	108897772	pA:uc007chf.1.tx_end;uc011wqd.1.tx_end	0	+
chr1	109277051	109277052	pA:Mm.12638.1.11;uc007chl.1.tx_end	0	+
chr1	109349265	109349266	pA:Mm.66015.1.6;uc007chm.2.tx_end	0	+
chr1	109422176	109422177	pA:Mm.271870.1.9;uc007chn.2.tx_end;uc007chp.2.tx_end;uc011wqe.1.tx_end	0	+
chr1	109443804	109443805	pA:Mm.123919.1.5;pas:K+711;pas:M+1235	0	+
chr1	109445847	109445848	pA:uc011wqf.1.tx_end;uc011wqg.1.tx_end	0	+
chr1	109501323	109501324	pA:Mm.83909.1.8	0	+
chr1	109502726	109502727	pA:uc007chr.2.tx_end	0	+
chr1	109504186	109504187	pA:Mm.83909.1.13;pas:B+550;pas:K+712;pas:L+462;pas:M+1236	0	+
chr1	109504236	109504237	pA:Mm.83909.1.14	0	+
chr1	109505157	109505158	pA:pas:K+713;pas:L+463	0	+
chr1	109505554	109505555	pA:uc007chs.2.tx_end;uc007cht.2.tx_end	0	+
chr1	109507051	109507052	pA:pas:K+714;pas:M+1237	0	+
chr1	109845901	109845902	pA:pas:K+716;pas:M+1240	0	+
chr1	109847523	109847524	pA:uc007chu.1.tx_end;uc011wqh.1.tx_end	0	+
chr1	109923763	109923764	pA:Mm.136054.1.4	0	+
chr1	111962373	111962374	pA:uc007chv.1.tx_end	0	+
chr1	112035577	112035578	pA:uc007chw.1.tx_end;uc011wqi.1.tx_end;uc011wqj.1.tx_end;uc011wqk.1.tx_end	0	+
chr1	112035769	112035770	pA:Mm.213407.1.13	0	+
chr1	112036733	112036734	pA:Mm.213407.1.16	0	+
chr1	112734791	112734792	pA:pas:B+554;pas:M+1259	0	+
chr1	113911151	113911152	pA:pas:L+466;pas:T+573	0	+
chr1	114035650	114035651	pA:pas:B+555;pas:K+719;pas:L+467;pas:M+1263;pas:T+574	0	+
chr1	114888266	114888267	pA:pas:B+556;pas:K+720;pas:L+468;pas:M+1270;pas:T+575	0	+
chr1	115672553	115672554	pA:pas:K+721;pas:T+576	0	+
chr1	116378096	116378097	pA:pas:B+557;pas:K+722;pas:L+469;pas:M+1273;pas:T+577	0	+
chr1	116540877	116540878	pA:pas:L+470;pas:T+578	0	+
chr1	117093886	117093887	pA:pas:M+1279;pas:T+579	0	+
chr1	118477250	118477251	pA:uc007cia.1.tx_end	0	+
chr1	118479110	118479111	pA:Mm.271040.1.1	0	+
chr1	118483899	118483900	pA:Mm.101576.1.1	0	+
chr1	119157542	119157543	pA:pas:B+561;pas:K+726;pas:L+472;pas:M+1286;pas:T+580	0	+
chr1	120226140	120226141	pA:uc011wql.1.tx_end	0	+
chr1	120230165	120230166	pA:Mm.280311.1.20;pas:B+562;pas:K+727;pas:L+474;pas:M+1289;pas:T+581	0	+
chr1	120230408	120230409	pA:Mm.280311.1.21;pas:B+563;pas:K+728;pas:L+475;pas:M+1290;pas:T+582;uc007cic.2.tx_end	0	+
chr1	120399789	120399790	pA:uc007cid.1.tx_end	0	+
chr1	120404152	120404153	pA:uc007cie.1.tx_end	0	+
chr1	120442035	120442036	pA:uc011wqm.1.tx_end;uc011wqn.1.tx_end	0	+
chr1	120504319	120504320	pA:Mm.138740.1.76;pas:L+476;pas:M+1294	0	+
chr1	120506038	120506039	pA:Mm.138740.1.78;pas:B+565;pas:K+730;pas:L+477;pas:M+1295;pas:T+584;uc007cif.1.tx_end;uc007cii.2.tx_end;uc007cij.2.tx_end	0	+
chr1	120534342	120534343	pA:uc007cik.1.tx_end	0	+
chr1	120575562	120575563	pA:pas:K+731;pas:M+1296	0	+
chr1	120581157	120581158	pA:Mm.24621.1.8	0	+
chr1	120581744	120581745	pA:Mm.24621.1.9;pas:B+566;pas:K+732;pas:L+478;pas:M+1298;uc007cil.1.tx_end	0	+
chr1	121282157	121282158	pA:uc007ciq.1.tx_end	0	+
chr1	121424185	121424186	pA:pas:K+734;pas:M+1304	0	+
chr1	121424727	121424728	pA:pas:M+1305;pas:T+586	0	+
chr1	121424802	121424803	pA:Mm.322656.1.7;pas:K+735;pas:T+587;uc007ciu.1.tx_end	0	+
chr1	121424873	121424874	pA:Mm.322656.1.8	0	+
chr1	121960110	121960111	pA:Mm.189223.1.5;uc007cjb.1.tx_end;uc007cjc.1.tx_end	0	+
chr1	122062034	122062035	pA:pas:K+737;pas:L+480;pas:M+1313;pas:T+590	0	+
chr1	122062885	122062886	pA:pas:B+567;pas:L+481;pas:M+1314	0	+
chr1	122083582	122083583	pA:pas:L+482;pas:T+592	0	+
chr1	122084766	122084767	pA:Mm.271602.1.6;pas:B+568;pas:K+738;pas:L+483;pas:M+1315;pas:T+593;uc007cjg.1.tx_end;uc007cjh.2.tx_end	0	+
chr1	122239755	122239756	pA:Mm.337409.1.4;pas:B+569;pas:M+1317;pas:T+594;uc007cjk.1.tx_end	0	+
chr1	122504567	122504568	pA:pas:B+571;pas:M+1318;uc007cjm.2.tx_end	0	+
chr1	122754582	122754583	pA:Mm.363068.1.1	0	+
chr1	123017008	123017009	pA:Mm.131017.1.6	0	+
chr1	123017532	123017533	pA:uc007cjn.1.tx_end	0	+
chr1	123340598	123340599	pA:uc007cjr.1.tx_end	0	+
chr1	123345634	123345635	pA:uc007cjs.1.tx_end	0	+
chr1	123398167	123398168	pA:Mm.25788.1.27;pas:B+574;pas:K+739;pas:L+484;pas:M+1324;pas:T+596	0	+
chr1	123403036	123403037	pA:pas:K+740;pas:L+485;pas:M+1325;pas:T+597;uc007cju.2.tx_end;uc011wqw.1.tx_end	0	+
chr1	125215531	125215532	pA:pas:K+742;pas:M+1333;pas:T+598	0	+
chr1	127071690	127071691	pA:uc007cjz.1.tx_end	0	+
chr1	127071755	127071756	pA:uc007cka.1.tx_end	0	+
chr1	127071977	127071978	pA:uc007ckb.1.tx_end	0	+
chr1	127072234	127072235	pA:uc007ckc.1.tx_end	0	+
chr1	127072839	127072840	pA:uc007ckd.1.tx_end	0	+
chr1	127492306	127492307	pA:Mm.28654.1.25;Mm.28654.1.26;pas:B+580;pas:K+744;pas:K+745;pas:L+488;pas:L+489;pas:M+1341;uc007ckg.1.tx_end	0	+
chr1	127492412	127492413	pA:Mm.28654.1.27;pas:L+490;pas:M+1342	0	+
chr1	127770437	127770438	pA:uc007ckh.2.tx_end	0	+
chr1	128605096	128605097	pA:pas:K+746;pas:L+492;pas:T+605	0	+
chr1	129172289	129172290	pA:pas:K+747;pas:L+493	0	+
chr1	129284788	129284789	pA:uc007ckp.1.tx_end	0	+
chr1	129295368	129295369	pA:uc007ckq.1.tx_end	0	+
chr1	129379548	129379549	pA:uc007ckr.1.tx_end;uc007cks.1.tx_end	0	+
chr1	129380286	129380287	pA:Mm.214682.1.16;pas:B+583;pas:K+748;pas:T+607	0	+
chr1	129381822	129381823	pA:pas:B+584;pas:K+749;pas:T+608	0	+
chr1	129383525	129383526	pA:pas:L+494;pas:T+609	0	+
chr1	129383813	129383814	pA:pas:B+585;pas:K+750;pas:M+1353;pas:T+610;uc007ckt.2.tx_end	0	+
chr1	129384911	129384912	pA:pas:B+586;pas:K+751;pas:L+495;pas:M+1354;pas:T+611	0	+
chr1	129664140	129664141	pA:uc007ckv.1.tx_end	0	+
chr1	129664554	129664555	pA:pas:K+756;pas:L+496;pas:M+1355	0	+
chr1	129692376	129692377	pA:uc007ckx.1.tx_end;uc007cky.1.tx_end	0	+
chr1	129701259	129701260	pA:pas:B+589;pas:M+1358	0	+
chr1	129701316	129701317	pA:Mm.268672.1.31;pas:K+757;pas:L+497;pas:M+1359;pas:T+613	0	+
chr1	129701413	129701414	pA:uc007ckz.1.tx_end;uc007clb.1.tx_end	0	+
chr1	129702344	129702345	pA:Mm.268672.1.33;pas:B+590;pas:K+758;pas:M+1360;pas:T+614	0	+
chr1	129702513	129702514	pA:Mm.268672.1.34;pas:K+759;pas:M+1361;uc007cla.1.tx_end	0	+
chr1	129704635	129704636	pA:pas:K+760;pas:M+1363	0	+
chr1	129765965	129765966	pA:pas:B+591;pas:M+1365	0	+
chr1	129817183	129817184	pA:pas:K+761;pas:M+1366	0	+
chr1	129837775	129837776	pA:pas:K+762;pas:M+1367	0	+
chr1	129840127	129840128	pA:Mm.261037.1.43;pas:B+592;pas:K+763;pas:K+764;pas:M+1368;pas:M+1369;pas:T+615	0	+
chr1	129840452	129840453	pA:Mm.261037.1.45;pas:B+593;pas:K+765;pas:L+499;pas:M+1370;pas:T+616;uc007clc.2.tx_end	0	+
chr1	129841682	129841683	pA:pas:M+1371;pas:T+617	0	+
chr1	129864572	129864573	pA:pas:B+594;pas:M+1372	0	+
chr1	130069987	130069988	pA:uc007clk.1.tx_end	0	+
chr1	130079707	130079708	pA:pas:B+595;pas:K+766	0	+
chr1	130081230	130081231	pA:uc007clh.1.tx_end	0	+
chr1	130085432	130085433	pA:Mm.221041.1.27;uc007cli.1.tx_end	0	+
chr1	130099006	130099007	pA:uc011wrc.1.tx_end	0	+
chr1	130113114	130113115	pA:Mm.221041.1.35	0	+
chr1	130134313	130134314	pA:Mm.221041.1.56;pas:B+597;pas:K+767;pas:L+500;pas:M+1382;pas:T+620;uc007clj.1.tx_end;uc011wrb.1.tx_end	0	+
chr1	130156116	130156117	pA:pas:L+501;pas:M+1383;pas:T+621	0	+
chr1	130159456	130159457	pA:Mm.293321.1.10	0	+
chr1	130171516	130171517	pA:Mm.293321.1.20	0	+
chr1	130174170	130174171	pA:pas:B+598;pas:K+768;pas:L+502;pas:M+1384;pas:T+622	0	+
chr1	130175953	130175954	pA:pas:K+770;pas:L+503;pas:M+1385;uc007cll.1.tx_end	0	+
chr1	130371200	130371201	pA:pas:B+601;pas:M+1387	0	+
chr1	131327629	131327630	pA:uc007clu.2.tx_end	0	+
chr1	132061974	132061975	pA:Mm.337483.1.17	0	+
chr1	132079757	132079758	pA:uc007clw.1.tx_end	0	+
chr1	132094097	132094098	pA:pas:B+603;pas:L+504	0	+
chr1	132115854	132115855	pA:Mm.337483.1.22;pas:B+604;pas:M+1396;uc007clv.2.tx_end	0	+
chr1	132618633	132618634	pA:uc007cmh.2.tx_end	0	+
chr1	132620933	132620934	pA:Mm.39287.1.1;pas:B+606;pas:K+775;pas:L+507;pas:M+1402	0	+
chr1	132641198	132641199	pA:Mm.268547.1.10;pas:B+607;pas:K+776;pas:L+508;pas:M+1403;pas:T+623;uc007cmi.2.tx_end;uc007cmj.2.tx_end	0	+
chr1	132711316	132711317	pA:uc007cmk.1.tx_end;uc007cml.1.tx_end	0	+
chr1	132715892	132715893	pA:Mm.358141.1.1	0	+
chr1	132748150	132748151	pA:Mm.276414.1.49	0	+
chr1	132748825	132748826	pA:Mm.276414.1.53;pas:B+608;pas:K+777;pas:L+511;pas:M+1406;pas:T+624;uc011wrk.1.tx_end	0	+
chr1	132777366	132777367	pA:pas:B+609;pas:K+778;pas:L+512;pas:M+1407;pas:T+625;uc007cmn.1.tx_end	0	+
chr1	132921546	132921547	pA:uc007cmu.2.tx_end	0	+
chr1	133055478	133055479	pA:uc007cmx.2.tx_end	0	+
chr1	133068084	133068085	pA:Mm.276294.1.27;pas:B+612;pas:K+779;pas:M+1409	0	+
chr1	133068812	133068813	pA:Mm.276294.1.28;pas:B+613;pas:L+514;pas:M+1410;uc007cmy.2.tx_end	0	+
chr1	133070051	133070052	pA:Mm.276294.1.32;pas:B+614;pas:K+780;pas:L+515;pas:M+1411;pas:T+629;uc007cmz.2.tx_end	0	+
chr1	133071423	133071424	pA:uc011wrn.1.tx_end	0	+
chr1	133075873	133075874	pA:uc007cna.2.tx_end	0	+
chr1	133076648	133076649	pA:pas:M+1414;pas:T+630	0	+
chr1	133076978	133076979	pA:uc007cnb.2.tx_end	0	+
chr1	133149846	133149847	pA:pas:B+616;pas:K+784;pas:L+516;pas:M+1416	0	+
chr1	133174674	133174675	pA:pas:K+785;pas:L+518	0	+
chr1	133435610	133435611	pA:Mm.31278.1.2;pas:K+787;pas:L+520;pas:M+1417;pas:T+632	0	+
chr1	133436448	133436449	pA:uc007cnk.1.tx_end	0	+
chr1	133508576	133508577	pA:uc007cnl.1.tx_end	0	+
chr1	133548121	133548122	pA:uc007cnm.1.tx_end	0	+
chr1	133551358	133551359	pA:pas:L+522;pas:M+1418	0	+
chr1	133562022	133562023	pA:uc007cno.1.tx_end	0	+
chr1	133572083	133572084	pA:Mm.230249.1.19;pas:K+788;pas:L+523;pas:T+634;uc007cnn.2.tx_end	0	+
chr1	133573249	133573250	pA:pas:L+525;pas:M+1419	0	+
chr1	133610040	133610041	pA:Mm.44508.1.16;pas:K+789;pas:L+526;pas:M+1421;pas:T+636;uc007cnp.1.tx_end;uc007cnq.1.tx_end	0	+
chr1	133612015	133612016	pA:uc007cnr.1.tx_end	0	+
chr1	133666981	133666982	pA:uc007cns.1.tx_end	0	+
chr1	133668080	133668081	pA:Mm.375242.1.1	0	+
chr1	133708979	133708980	pA:pas:K+790;pas:L+527	0	+
chr1	133712783	133712784	pA:pas:K+791;pas:L+528	0	+
chr1	133713020	133713021	pA:pas:K+792;pas:L+529	0	+
chr1	133714731	133714732	pA:Mm.23844.1.19;pas:B+618;pas:K+793;pas:K+794;pas:L+530;pas:M+1424;uc007cnt.2.tx_end	0	+
chr1	133715534	133715535	pA:pas:K+795;pas:L+531	0	+
chr1	133718057	133718058	pA:pas:K+796;pas:L+532	0	+
chr1	133727151	133727152	pA:Mm.266156.1.6	0	+
chr1	133743434	133743435	pA:pas:K+797;pas:M+1427;pas:T+638	0	+
chr1	133743550	133743551	pA:Mm.266156.1.17	0	+
chr1	133745439	133745440	pA:Mm.266156.1.18;pas:B+619;pas:K+798;pas:M+1428;pas:T+639;uc007cnu.2.tx_end	0	+
chr1	133769463	133769464	pA:Mm.34027.1.14;pas:B+620;pas:K+799;pas:L+533;pas:M+1429;pas:T+642;uc007cnv.2.tx_end;uc007cnw.1.tx_end	0	+
chr1	133769840	133769841	pA:pas:K+800;pas:L+534	0	+
chr1	133827865	133827866	pA:pas:K+801;pas:L+535;pas:M+1431;pas:M+1432;pas:T+644	0	+
chr1	133828185	133828186	pA:Mm.246869.1.14;pas:K+803;pas:L+536;pas:L+537;pas:M+1433;pas:T+645	0	+
chr1	133828438	133828439	pA:Mm.246869.1.15	0	+
chr1	133828829	133828830	pA:Mm.246869.1.16	0	+
chr1	133828918	133828919	pA:Mm.246869.1.17;pas:L+538;pas:M+1436	0	+
chr1	133829555	133829556	pA:Mm.246869.1.18;pas:K+804;pas:M+1437;pas:T+646	0	+
chr1	133832897	133832898	pA:pas:B+622;pas:K+806;pas:L+539;pas:M+1438;pas:T+647;uc007cnx.2.tx_end;uc007cny.2.tx_end	0	+
chr1	133879544	133879545	pA:Mm.200307.1.29;pas:K+808;pas:L+540;pas:M+1439;pas:T+648;uc007cnz.1.tx_end;uc007coa.1.tx_end	0	+
chr1	133920414	133920415	pA:uc007cob.1.tx_end	0	+
chr1	133922260	133922261	pA:uc007coc.1.tx_end	0	+
chr1	133928221	133928222	pA:pas:K+810;pas:L+542;pas:M+1442	0	+
chr1	133929186	133929187	pA:Mm.254233.1.10;pas:K+811;pas:L+543;pas:M+1444;pas:T+649;uc007cod.1.tx_end	0	+
chr1	134039549	134039550	pA:pas:L+544;pas:M+1445	0	+
chr1	134094760	134094761	pA:uc011wrv.1.tx_end	0	+
chr1	134102362	134102363	pA:Mm.380308.1.4	0	+
chr1	134106122	134106123	pA:Mm.380308.1.5;uc007coi.2.tx_end	0	+
chr1	134126194	134126195	pA:Mm.75052.1.3;uc007col.1.tx_end	0	+
chr1	134153958	134153959	pA:Mm.75052.1.11;uc007coj.2.tx_end;uc007cok.2.tx_end;uc007com.2.tx_end	0	+
chr1	134201754	134201755	pA:pas:B+625;pas:K+813;pas:L+545;pas:M+1447;pas:T+653	0	+
chr1	134202093	134202094	pA:pas:B+626;pas:B+627;pas:K+814;pas:K+815;pas:M+1449;pas:T+654;pas:T+655	0	+
chr1	134202146	134202147	pA:Mm.39723.1.11;pas:B+628;pas:K+816;pas:L+546;pas:M+1450;pas:T+656	0	+
chr1	134203933	134203934	pA:uc007con.1.tx_end	0	+
chr1	134205059	134205060	pA:pas:B+631;pas:K+819	0	+
chr1	134229869	134229870	pA:Mm.100666.1.17	0	+
chr1	134230064	134230065	pA:uc007coo.2.tx_end;uc007cop.2.tx_end	0	+
chr1	134245838	134245839	pA:uc007coq.1.tx_end	0	+
chr1	134346551	134346552	pA:uc011wrw.1.tx_end	0	+
chr1	134354215	134354216	pA:uc007cov.1.tx_end	0	+
chr1	134361805	134361806	pA:Mm.257120.1.28	0	+
chr1	134361853	134361854	pA:Mm.257120.1.29	0	+
chr1	134363305	134363306	pA:Mm.257120.1.31;pas:B+632;pas:K+822;pas:L+547;pas:M+1453;pas:T+657	0	+
chr1	134363535	134363536	pA:Mm.257120.1.33;pas:B+633;pas:K+823;pas:L+548;pas:M+1454;pas:T+658;uc007cou.1.tx_end	0	+
chr1	134401066	134401067	pA:uc007cow.2.tx_end	0	+
chr1	134401234	134401235	pA:Mm.132868.1.26	0	+
chr1	134401466	134401467	pA:pas:K+825;pas:L+549;pas:M+1456;pas:T+659	0	+
chr1	134402241	134402242	pA:Mm.132868.1.28;pas:M+1457;pas:T+660;uc007cox.2.tx_end;uc007coy.2.tx_end	0	+
chr1	134402440	134402441	pA:Mm.132868.1.29;pas:K+826;pas:M+1458	0	+
chr1	134405215	134405216	pA:Mm.34611.1.3;pas:K+827;pas:L+550;uc007coz.2.tx_end	0	+
chr1	134591171	134591172	pA:Mm.380307.1.3;uc007cph.1.tx_end	0	+
chr1	134836581	134836582	pA:Mm.39640.1.14;pas:B+635;pas:K+829;pas:M+1459;pas:T+661;uc007cpi.2.tx_end	0	+
chr1	134964609	134964610	pA:uc007cpq.1.tx_end	0	+
chr1	134977913	134977914	pA:uc007cpr.1.tx_end	0	+
chr1	135004246	135004247	pA:pas:B+638;pas:M+1461;pas:T+663	0	+
chr1	135005264	135005265	pA:uc011wry.1.tx_end	0	+
chr1	135033572	135033573	pA:Mm.293628.1.5;pas:K+830;pas:M+1462;pas:T+664	0	+
chr1	135035025	135035026	pA:Mm.293628.1.10;pas:B+639;pas:L+552;pas:M+1463;pas:T+665	0	+
chr1	135036376	135036377	pA:Mm.293628.1.11;pas:B+640;pas:K+831;pas:L+553;pas:M+1464;pas:T+666;uc007cps.2.tx_end;uc007cpt.2.tx_end	0	+
chr1	135175362	135175363	pA:pas:K+833;pas:L+554	0	+
chr1	135189517	135189518	pA:uc007cpy.1.tx_end	0	+
chr1	135197795	135197796	pA:Mm.253559.1.24;pas:K+834;pas:L+555	0	+
chr1	135198129	135198130	pA:Mm.253559.1.25;pas:K+835;pas:M+1466	0	+
chr1	135198193	135198194	pA:Mm.253559.1.26	0	+
chr1	135198279	135198280	pA:Mm.253559.1.27	0	+
chr1	135199713	135199714	pA:Mm.253559.1.29;pas:B+641;pas:K+836;pas:L+557;pas:M+1467	0	+
chr1	135200011	135200012	pA:Mm.253559.1.30;pas:B+642;pas:K+837;pas:L+558;pas:M+1468;uc007cpu.2.tx_end;uc007cpv.2.tx_end;uc007cpx.2.tx_end	0	+
chr1	135218518	135218519	pA:Mm.247935.1.8;pas:K+839;pas:L+559	0	+
chr1	135219603	135219604	pA:pas:K+840;pas:L+560;uc007cqa.1.tx_end	0	+
chr1	135221118	135221119	pA:pas:K+841;pas:L+561	0	+
chr1	135226298	135226299	pA:uc007cqb.1.tx_end;uc007cqc.1.tx_end;uc007cqd.1.tx_end;uc007cqe.1.tx_end;uc011wrz.1.tx_end	0	+
chr1	135256899	135256900	pA:Mm.220955.1.16;pas:K+842;pas:L+562;pas:T+667;uc007cqf.1.tx_end	0	+
chr1	135271298	135271299	pA:uc011wsa.1.tx_end	0	+
chr1	135271626	135271627	pA:uc007cqg.2.tx_end	0	+
chr1	135276894	135276895	pA:Mm.52111.1.16;pas:B+643;pas:K+843;pas:L+563;pas:M+1469;pas:T+668;uc007cqh.2.tx_end;uc007cqi.2.tx_end	0	+
chr1	135512569	135512570	pA:pas:K+844;pas:M+1471	0	+
chr1	135880740	135880741	pA:pas:B+645;pas:M+1472;pas:T+672	0	+
chr1	135915808	135915809	pA:pas:K+845;pas:M+1476	0	+
chr1	135944735	135944736	pA:pas:B+646;pas:K+846;pas:L+565;pas:M+1477;pas:T+673	0	+
chr1	135944856	135944857	pA:pas:B+647;pas:M+1478;uc007crd.1.tx_end	0	+
chr1	135981186	135981187	pA:Mm.351211.1.1	0	+
chr1	136048012	136048013	pA:uc007crf.1.tx_end;uc011wsd.1.tx_end	0	+
chr1	136048116	136048117	pA:Mm.328268.1.6;pas:B+648;pas:M+1481;pas:T+674	0	+
chr1	136086607	136086608	pA:Mm.38274.1.21;pas:B+649;pas:M+1482;pas:T+675;uc007crg.2.tx_end	0	+
chr1	136097636	136097637	pA:uc007crh.1.tx_end	0	+
chr1	136097812	136097813	pA:Mm.379067.1.14;pas:B+650;pas:L+566;pas:M+1483;pas:T+676;uc007cri.1.tx_end	0	+
chr1	136189125	136189126	pA:Mm.16528.1.5;pas:M+1485;pas:T+677;uc007crl.2.tx_end	0	+
chr1	136287559	136287560	pA:uc007crt.2.tx_end	0	+
chr1	136302048	136302049	pA:pas:B+651;pas:K+847;pas:L+568;pas:M+1486;pas:T+678	0	+
chr1	136306575	136306576	pA:uc007crw.1.tx_end	0	+
chr1	136308314	136308315	pA:Mm.280230.1.21;pas:B+652;pas:K+848;pas:L+569;pas:M+1488;pas:T+679;uc007cru.1.tx_end;uc007crv.1.tx_end	0	+
chr1	136328308	136328309	pA:Mm.259976.1.26;pas:B+653;pas:K+849;pas:L+570;pas:M+1489;pas:T+680	0	+
chr1	136328917	136328918	pA:Mm.259976.1.37;pas:B+654;pas:K+850;pas:L+571;pas:M+1490;pas:T+681;uc007crx.1.tx_end;uc007cry.1.tx_end	0	+
chr1	136329924	136329925	pA:pas:B+655;pas:K+851;pas:L+572;pas:M+1491	0	+
chr1	136363146	136363147	pA:uc007crz.1.tx_end	0	+
chr1	136387449	136387450	pA:pas:B+656;pas:K+852;pas:L+573;pas:M+1495;pas:T+682;uc007csa.1.tx_end;uc007csb.1.tx_end	0	+
chr1	136387594	136387595	pA:pas:B+657;pas:K+853;pas:L+574;pas:M+1496;pas:T+683	0	+
chr1	136403040	136403041	pA:pas:B+658;pas:K+854	0	+
chr1	136403195	136403196	pA:pas:K+855;pas:M+1497;pas:T+684	0	+
chr1	136404466	136404467	pA:Mm.198119.1.9;pas:K+856;pas:L+575;pas:M+1498;pas:T+686;uc007csc.1.tx_end	0	+
chr1	136503367	136503368	pA:uc007csf.2.tx_end	0	+
chr1	136528131	136528132	pA:pas:K+857;pas:L+576;pas:M+1504;uc007csg.2.tx_end	0	+
chr1	136528523	136528524	pA:Mm.28995.1.77;pas:B+659;pas:K+858;pas:L+577;pas:M+1505;pas:T+689	0	+
chr1	136528769	136528770	pA:Mm.28995.1.78	0	+
chr1	136529385	136529386	pA:pas:B+660;pas:M+1506;pas:T+690	0	+
chr1	136529462	136529463	pA:Mm.28995.1.79;pas:B+661;pas:K+859;pas:L+578;pas:M+1507;pas:T+691;uc011wsg.1.tx_end	0	+
chr1	136529811	136529812	pA:pas:B+662;pas:K+860;pas:M+1508	0	+
chr1	136531868	136531869	pA:pas:L+579;pas:M+1509	0	+
chr1	136638552	136638553	pA:uc007csi.1.tx_end	0	+
chr1	136645295	136645296	pA:Mm.5102.1.5	0	+
chr1	136645665	136645666	pA:Mm.5102.1.6	0	+
chr1	136645993	136645994	pA:uc007csj.1.tx_end;uc007csk.1.tx_end	0	+
chr1	136649725	136649726	pA:Mm.5102.1.8;pas:B+668;pas:M+1510	0	+
chr1	136870738	136870739	pA:Mm.284587.1.14;uc007csp.1.tx_end	0	+
chr1	137041898	137041899	pA:pas:K+861;pas:M+1514;pas:T+696;uc007css.1.tx_end;uc007cst.1.tx_end;uc011wsh.1.tx_end	0	+
chr1	137052846	137052847	pA:Mm.174998.1.20;pas:B+671;pas:K+862;pas:L+581;pas:M+1515;pas:T+699;uc007csu.1.tx_end	0	+
chr1	137182665	137182666	pA:pas:K+863;pas:M+1517	0	+
chr1	137263405	137263406	pA:Mm.180124.1.10;pas:K+866;pas:L+582;pas:M+1518	0	+
chr1	137264641	137264642	pA:uc007cta.1.tx_end	0	+
chr1	137496526	137496527	pA:Mm.185947.1.2;uc007ctm.1.tx_end	0	+
chr1	137648806	137648807	pA:Mm.196484.1.7;pas:B+673;pas:K+868;pas:L+584;pas:M+1527;pas:T+702;uc007cto.1.tx_end	0	+
chr1	137665585	137665586	pA:pas:B+674;pas:M+1528	0	+
chr1	137665710	137665711	pA:Mm.34346.1.7;pas:B+675;pas:K+869;pas:L+585;pas:M+1529;pas:T+703;uc007ctq.2.tx_end	0	+
chr1	137681677	137681678	pA:Mm.359299.1.1;uc007ctr.1.tx_end	0	+
chr1	137706487	137706488	pA:pas:M+1532;pas:T+704	0	+
chr1	137707565	137707566	pA:pas:B+676;pas:L+586;pas:M+1533;pas:T+705;uc011wsm.1.tx_end;uc011wsn.1.tx_end	0	+
chr1	137729538	137729539	pA:Mm.36726.1.28;pas:K+870;pas:L+587;pas:T+706	0	+
chr1	137729917	137729918	pA:pas:K+872;pas:T+707;uc007ctt.1.tx_end	0	+
chr1	137748837	137748838	pA:Mm.247470.1.24;pas:K+873;pas:T+708;uc007ctu.2.tx_end;uc007ctv.2.tx_end;uc007ctw.2.tx_end;uc007ctx.2.tx_end;uc007cty.2.tx_end;uc007cua.2.tx_end;uc011wso.1.tx_end;uc011wsp.1.tx_end;uc011wsq.1.tx_end;uc011wsr.1.tx_end	0	+
chr1	137930938	137930939	pA:pas:K+874;pas:L+588;pas:M+1536;pas:T+709	0	+
chr1	137931606	137931607	pA:Mm.41773.1.11;pas:B+677;pas:K+875;pas:L+590;pas:M+1537;pas:T+710;uc007cue.2.tx_end;uc011wsv.1.tx_end;uc011wsw.1.tx_end;uc011wsx.1.tx_end	0	+
chr1	138016111	138016112	pA:Mm.337571.1.8	0	+
chr1	138016398	138016399	pA:uc007cuf.1.tx_end;uc007cug.1.tx_end	0	+
chr1	138051004	138051005	pA:pas:B+679;pas:T+714	0	+
chr1	138071312	138071313	pA:Mm.276135.1.57	0	+
chr1	138074590	138074591	pA:Mm.276135.1.58;pas:B+680;pas:K+876;pas:L+591;pas:M+1542;pas:T+716;uc007cul.1.tx_end;uc007cum.1.tx_end	0	+
chr1	138075990	138075991	pA:Mm.29695.1.1	0	+
chr1	138147057	138147058	pA:Mm.124169.1.1	0	+
chr1	138261540	138261541	pA:pas:M+1544;pas:T+720	0	+
chr1	138297774	138297775	pA:pas:B+681;pas:M+1546	0	+
chr1	138314368	138314369	pA:uc007cut.1.tx_end	0	+
chr1	138314928	138314929	pA:pas:B+682;pas:M+1547	0	+
chr1	138329114	138329115	pA:Mm.208000.1.15	0	+
chr1	138336683	138336684	pA:Mm.208000.1.20	0	+
chr1	138336732	138336733	pA:Mm.208000.1.21;pas:B+683;pas:K+878;pas:L+592;pas:M+1549;pas:T+721	0	+
chr1	138336796	138336797	pA:uc007cuu.2.tx_end	0	+
chr1	138426153	138426154	pA:Mm.246505.1.10;pas:B+684;pas:K+879;pas:M+1550;pas:T+722	0	+
chr1	138428087	138428088	pA:uc007cuv.1.tx_end	0	+
chr1	138526186	138526187	pA:pas:B+685;pas:K+880	0	+
chr1	138526633	138526634	pA:pas:B+686;pas:K+881;pas:M+1551	0	+
chr1	138526967	138526968	pA:uc007cuw.2.tx_end;uc007cux.2.tx_end	0	+
chr1	138529678	138529679	pA:pas:B+687;pas:K+882;pas:L+595;pas:M+1553	0	+
chr1	138587381	138587382	pA:Mm.30630.1.1;pas:K+885;pas:M+1556;pas:T+723	0	+
chr1	138622304	138622305	pA:uc007cuy.1.tx_end	0	+
chr1	138686095	138686096	pA:uc007cuz.1.tx_end	0	+
chr1	138690353	138690354	pA:Mm.304782.1.1	0	+
chr1	139464651	139464652	pA:Mm.371464.1.1	0	+
chr1	139848214	139848215	pA:Mm.247140.1.1	0	+
chr1	139863294	139863295	pA:uc007cve.2.tx_end	0	+
chr1	139865591	139865592	pA:pas:K+890;pas:L+599;pas:M+1559;pas:T+730	0	+
chr1	140184612	140184613	pA:Mm.114424.1.2;pas:K+892;pas:T+732	0	+
chr1	140186038	140186039	pA:uc007cvm.1.tx_end	0	+
chr1	140875822	140875823	pA:uc007cwa.1.tx_end	0	+
chr1	140960294	140960295	pA:Mm.370351.1.2;uc007cvy.2.tx_end	0	+
chr1	141071873	141071874	pA:pas:B+689;pas:K+901;pas:M+1571	0	+
chr1	141072559	141072560	pA:Mm.288471.1.1	0	+
chr1	141072619	141072620	pA:Mm.288471.1.2;pas:B+690;pas:K+902;pas:L+600;pas:M+1573;uc007cvz.2.tx_end;uc007cwb.2.tx_end;uc011wtc.1.tx_end	0	+
chr1	141310444	141310445	pA:Mm.115721.1.1	0	+
chr1	141345766	141345767	pA:Mm.119711.1.15	0	+
chr1	141345915	141345916	pA:pas:L+601;pas:M+1576	0	+
chr1	141348007	141348008	pA:pas:K+904;pas:L+602	0	+
chr1	141349137	141349138	pA:pas:K+905;pas:M+1577	0	+
chr1	141349583	141349584	pA:pas:K+906;pas:L+603;pas:M+1578;uc007cwg.2.tx_end;uc011wtd.1.tx_end	0	+
chr1	141349773	141349774	pA:pas:B+691;pas:K+907;pas:L+604	0	+
chr1	141355020	141355021	pA:uc007cwj.1.tx_end	0	+
chr1	141390465	141390466	pA:Mm.168523.1.25	0	+
chr1	141390666	141390667	pA:pas:K+909;pas:T+735;uc007cwh.1.tx_end;uc007cwi.1.tx_end	0	+
chr1	141404842	141404843	pA:pas:K+910;pas:L+607	0	+
chr1	141420332	141420333	pA:Mm.30105.1.17;pas:K+911;pas:L+610;uc007cwk.2.tx_end	0	+
chr1	142419836	142419837	pA:uc007cww.1.tx_end	0	+
chr1	142506837	142506838	pA:uc011wth.1.tx_end	0	+
chr1	142510531	142510532	pA:pas:B+692;pas:K+914	0	+
chr1	143223130	143223131	pA:pas:K+915;pas:L+612;pas:T+736	0	+
chr1	145488223	145488224	pA:Mm.285580.1.1	0	+
chr1	145495227	145495228	pA:Mm.285580.1.7;pas:B+697;pas:M+1601	0	+
chr1	145495852	145495853	pA:pas:B+698;pas:M+1602	0	+
chr1	145496039	145496040	pA:Mm.285580.1.8	0	+
chr1	145497066	145497067	pA:uc007cwy.2.tx_end	0	+
chr1	145500255	145500256	pA:pas:B+699;pas:K+919;pas:M+1606	0	+
chr1	145501745	145501746	pA:pas:B+700;pas:M+1607	0	+
chr1	145593816	145593817	pA:pas:L+614;pas:M+1611	0	+
chr1	145593904	145593905	pA:Mm.272727.1.9;pas:B+702;pas:K+921;pas:L+615;pas:M+1612;pas:T+738	0	+
chr1	145596425	145596426	pA:pas:K+922;pas:M+1613	0	+
chr1	145596807	145596808	pA:pas:B+703;pas:K+923;pas:T+739;uc007cwz.1.tx_end;uc007cxa.1.tx_end;uc007cxb.1.tx_end;uc007cxc.1.tx_end;uc011wtj.1.tx_end	0	+
chr1	145625458	145625459	pA:pas:M+1614;pas:T+740	0	+
chr1	145625907	145625908	pA:pas:B+704;pas:K+926;pas:M+1615	0	+
chr1	145649364	145649365	pA:Mm.261004.1.15;pas:B+705;pas:K+927;pas:L+617;pas:M+1617;pas:T+741	0	+
chr1	145650208	145650209	pA:pas:B+706;pas:K+928;pas:L+618;pas:M+1618;pas:T+742	0	+
chr1	145653935	145653936	pA:pas:B+707;pas:K+929;pas:L+619;pas:M+1619;pas:T+743	0	+
chr1	145654065	145654066	pA:Mm.261004.1.17;pas:B+708;pas:K+930;pas:L+620;pas:M+1620;pas:T+744	0	+
chr1	145654431	145654432	pA:Mm.261004.1.18;pas:B+709;pas:M+1621	0	+
chr1	145654595	145654596	pA:uc007cxe.2.tx_end;uc007cxf.2.tx_end	0	+
chr1	148364683	148364684	pA:uc007cxr.1.tx_end	0	+
chr1	148679086	148679087	pA:uc011wtk.1.tx_end	0	+
chr1	148749507	148749508	pA:Mm.337647.1.8	0	+
chr1	148749601	148749602	pA:Mm.337647.1.9;pas:B+712;pas:M+1639;uc007cxo.2.tx_end;uc007cxp.2.tx_end;uc007cxq.2.tx_end	0	+
chr1	149365291	149365292	pA:pas:M+1642;pas:T+748	0	+
chr1	149524865	149524866	pA:pas:B+713;pas:K+934;pas:L+621;pas:M+1643;pas:T+749	0	+
chr1	151812421	151812422	pA:pas:K+937;pas:M+1653	0	+
chr1	151953254	151953255	pA:Mm.292547.1.12	0	+
chr1	151955141	151955142	pA:uc007cxv.1.tx_end	0	+
chr1	151955285	151955286	pA:pas:B+715;pas:K+938	0	+
chr1	151955356	151955357	pA:Mm.292547.1.16	0	+
chr1	151981225	151981226	pA:pas:K+939;pas:L+623	0	+
chr1	152179336	152179337	pA:Mm.47709.1.4	0	+
chr1	152181035	152181036	pA:Mm.47709.1.10;uc007cxw.1.tx_end;uc007cxx.2.tx_end;uc011wtl.1.tx_end	0	+
chr1	152257156	152257157	pA:Mm.174256.1.19	0	+
chr1	152263370	152263371	pA:uc007cyc.1.tx_end	0	+
chr1	152271939	152271940	pA:uc007cyd.1.tx_end	0	+
chr1	152277793	152277794	pA:Mm.174256.1.75	0	+
chr1	152287444	152287445	pA:Mm.174256.1.102;pas:K+940;pas:L+624;pas:M+1658;pas:T+753;uc007cye.1.tx_end;uc007cyf.1.tx_end	0	+
chr1	152297064	152297065	pA:Mm.174256.1.126;pas:B+717;pas:K+941;pas:L+625;pas:M+1659;pas:T+754;uc007cyb.2.tx_end	0	+
chr1	152545197	152545198	pA:pas:L+626;pas:M+1661	0	+
chr1	152630628	152630629	pA:uc007cyk.1.tx_end	0	+
chr1	153203928	153203929	pA:Mm.33764.1.18;pas:B+720;pas:K+946;pas:L+628;pas:M+1666;pas:T+756;uc007cym.1.tx_end	0	+
chr1	153210681	153210682	pA:pas:K+947;pas:L+629;pas:L+630;pas:M+1668	0	+
chr1	153210772	153210773	pA:Mm.33764.1.38;pas:B+722;pas:K+948;pas:L+631;pas:M+1669	0	+
chr1	153210999	153211000	pA:Mm.33764.1.42;pas:K+949;pas:L+632;pas:M+1670	0	+
chr1	153211387	153211388	pA:Mm.33764.1.43;pas:B+723;pas:K+950;pas:L+633;pas:M+1671;pas:T+757	0	+
chr1	153211574	153211575	pA:Mm.33764.1.44;pas:B+724;pas:K+951;pas:L+634;pas:M+1672;pas:T+758;uc007cyn.1.tx_end;uc007cyo.1.tx_end;uc007cyp.1.tx_end	0	+
chr1	153211912	153211913	pA:pas:K+952;pas:L+635;pas:M+1673	0	+
chr1	153276502	153276503	pA:pas:B+725;pas:M+1676	0	+
chr1	153283836	153283837	pA:uc007cyr.1.tx_end;uc007cys.1.tx_end	0	+
chr1	153290837	153290838	pA:uc007cyt.1.tx_end	0	+
chr1	153298053	153298054	pA:uc007cyu.1.tx_end	0	+
chr1	153301180	153301181	pA:pas:B+726;pas:K+953;pas:L+636	0	+
chr1	153305312	153305313	pA:Mm.289373.1.25;pas:B+728;pas:K+954;pas:L+637;pas:M+1677;pas:T+759;uc007cyv.2.tx_end;uc007cyw.2.tx_end	0	+
chr1	153525841	153525842	pA:pas:B+729;pas:M+1679	0	+
chr1	153537311	153537312	pA:Mm.157700.1.11;uc011wtn.1.tx_end	0	+
chr1	153564899	153564900	pA:Mm.157700.1.24	0	+
chr1	153566333	153566334	pA:Mm.157700.1.26	0	+
chr1	153566480	153566481	pA:Mm.157700.1.27;pas:K+955;pas:L+638;pas:M+1681;pas:T+760;uc007cyz.2.tx_end;uc007cza.2.tx_end;uc011wto.1.tx_end	0	+
chr1	153568166	153568167	pA:pas:K+956;pas:M+1682	0	+
chr1	153569067	153569068	pA:pas:K+957;pas:L+639;pas:M+1683;pas:T+761	0	+
chr1	153635222	153635223	pA:uc007czb.1.tx_end	0	+
chr1	153669198	153669199	pA:Mm.337691.1.29;pas:B+730;pas:K+958;pas:L+640;pas:M+1684;pas:T+763	0	+
chr1	153669457	153669458	pA:uc007czc.2.tx_end;uc011wtp.1.tx_end;uc011wtq.1.tx_end	0	+
chr1	153939054	153939055	pA:pas:B+731;pas:L+642;pas:M+1694	0	+
chr1	154356117	154356118	pA:pas:K+960;pas:M+1697	0	+
chr1	154357828	154357829	pA:Mm.23782.1.9;pas:K+961;pas:M+1698;pas:T+765;uc007czg.2.tx_end;uc011wtr.1.tx_end	0	+
chr1	154358317	154358318	pA:pas:K+962;pas:M+1699	0	+
chr1	154364077	154364078	pA:pas:B+733;pas:K+963;pas:M+1700	0	+
chr1	154604673	154604674	pA:uc007czi.1.tx_end	0	+
chr1	154621642	154621643	pA:pas:K+966;pas:M+1701	0	+
chr1	154621742	154621743	pA:Mm.288974.1.4;pas:L+643;pas:T+768	0	+
chr1	154622392	154622393	pA:Mm.288974.1.7	0	+
chr1	154622709	154622710	pA:Mm.288974.1.8;pas:B+734;pas:K+967;pas:L+644;pas:M+1703;pas:T+769;uc007czj.2.tx_end;uc007czk.2.tx_end	0	+
chr1	154683384	154683385	pA:Mm.270307.1.18	0	+
chr1	154684119	154684120	pA:uc007czm.1.tx_end	0	+
chr1	154962861	154962862	pA:Mm.40548.1.18	0	+
chr1	154963199	154963200	pA:Mm.40548.1.22	0	+
chr1	154966283	154966284	pA:Mm.40548.1.27;pas:B+738;pas:K+968;pas:M+1705	0	+
chr1	154966390	154966391	pA:Mm.40548.1.28;pas:B+739;pas:M+1706;pas:T+772;uc007czq.1.tx_end;uc011wts.1.tx_end	0	+
chr1	155046190	155046191	pA:pas:K+970;pas:M+1707	0	+
chr1	155299703	155299704	pA:pas:B+743;pas:M+1709;uc007czx.1.tx_end	0	+
chr1	155540198	155540199	pA:pas:B+746;pas:M+1711	0	+
chr1	155541082	155541083	pA:Mm.379143.1.7	0	+
chr1	155542023	155542024	pA:Mm.379143.1.8	0	+
chr1	155544560	155544561	pA:Mm.379143.1.9	0	+
chr1	155544794	155544795	pA:Mm.379143.1.10;pas:B+748;pas:M+1712;uc007dad.1.tx_end	0	+
chr1	155592597	155592598	pA:Mm.181709.1.13;pas:B+751;pas:K+973;pas:L+647;pas:M+1713;pas:T+774;uc007dae.2.tx_end	0	+
chr1	155607943	155607944	pA:uc007dah.1.tx_end	0	+
chr1	155608040	155608041	pA:uc007daf.1.tx_end;uc011wtu.1.tx_end	0	+
chr1	155611350	155611351	pA:uc007dag.2.tx_end;uc007daj.2.tx_end	0	+
chr1	155699334	155699335	pA:pas:B+752;pas:L+648;pas:M+1714;pas:T+775	0	+
chr1	155724000	155724001	pA:uc007dao.1.tx_end	0	+
chr1	155740189	155740190	pA:uc007dap.2.tx_end	0	+
chr1	155744243	155744244	pA:Mm.337723.1.1	0	+
chr1	155751799	155751800	pA:Mm.210745.1.5	0	+
chr1	155755417	155755418	pA:Mm.210745.1.17;pas:B+753;pas:K+975;pas:L+649;pas:M+1715;pas:T+776	0	+
chr1	155755879	155755880	pA:pas:B+754;pas:K+977;pas:M+1716	0	+
chr1	155755962	155755963	pA:Mm.210745.1.19;pas:K+978;pas:L+650	0	+
chr1	155756352	155756353	pA:pas:B+755;pas:K+979;pas:L+651;pas:T+777	0	+
chr1	155756407	155756408	pA:pas:B+756;pas:K+980;pas:L+652;pas:T+778	0	+
chr1	155756619	155756620	pA:Mm.210745.1.20;pas:B+757;pas:K+982;pas:L+653;pas:M+1717;pas:T+779	0	+
chr1	155756793	155756794	pA:Mm.210745.1.21;pas:B+758;pas:K+983;pas:L+655;pas:M+1718;pas:T+780	0	+
chr1	155756850	155756851	pA:pas:B+759;pas:K+984;pas:L+656;pas:M+1719;uc007daq.1.tx_end	0	+
chr1	155756983	155756984	pA:pas:B+760;pas:L+657	0	+
chr1	155758354	155758355	pA:pas:B+761;pas:K+985;pas:L+658;pas:M+1722	0	+
chr1	156117545	156117546	pA:uc007dau.1.tx_end	0	+
chr1	157025316	157025317	pA:pas:M+1734;pas:T+783	0	+
chr1	157045384	157045385	pA:pas:K+994;pas:M+1735;pas:T+784;uc007dbc.1.tx_end	0	+
chr1	157049830	157049831	pA:Mm.66264.1.29;pas:B+764;pas:K+995;pas:L+660;pas:M+1737;pas:T+785	0	+
chr1	157050654	157050655	pA:Mm.66264.1.31;pas:K+996;pas:L+661;pas:M+1738;pas:T+786;uc007dbb.1.tx_end	0	+
chr1	157050957	157050958	pA:Mm.66264.1.32;pas:B+765;pas:M+1739;pas:T+787	0	+
chr1	157052773	157052774	pA:pas:K+997;pas:M+1740;pas:T+789	0	+
chr1	157055385	157055386	pA:uc007dbd.1.tx_end	0	+
chr1	157385442	157385443	pA:pas:K+1002;pas:M+1743	0	+
chr1	157414436	157414437	pA:Mm.288249.1.2	0	+
chr1	157419417	157419418	pA:Mm.288249.1.5;pas:B+767;pas:K+1003;pas:L+663;pas:M+1744;pas:T+792;uc007dbk.2.tx_end	0	+
chr1	157434929	157434930	pA:pas:B+768;pas:K+1004;pas:L+664;pas:M+1745;pas:T+793;uc007dbl.2.tx_end	0	+
chr1	157442293	157442294	pA:pas:B+769;pas:M+1746	0	+
chr1	157534362	157534363	pA:Mm.288249.1.17;pas:B+771;pas:K+1005;pas:L+665;pas:M+1748;pas:T+795;pas:T+796;uc011wtw.1.tx_end	0	+
chr1	157534466	157534467	pA:pas:B+772;pas:K+1006;pas:T+797	0	+
chr1	157538454	157538455	pA:pas:B+775;pas:K+1008;pas:L+666;pas:M+1749	0	+
chr1	157629445	157629446	pA:pas:M+1750;pas:T+798	0	+
chr1	157833437	157833438	pA:pas:K+1010;pas:M+1751;pas:T+799	0	+
chr1	157884008	157884009	pA:pas:K+1011;pas:M+1754	0	+
chr1	157899865	157899866	pA:pas:K+1013;pas:T+800	0	+
chr1	157899927	157899928	pA:Mm.351270.1.5;pas:B+776;pas:K+1014;pas:L+667;pas:M+1757;pas:T+801	0	+
chr1	157900658	157900659	pA:Mm.351270.1.7;pas:B+777;pas:K+1015;pas:L+668;pas:M+1758	0	+
chr1	157900865	157900866	pA:pas:K+1016;pas:M+1759;uc007dby.2.tx_end;uc007dca.2.tx_end;uc007dcb.2.tx_end;uc011wub.1.tx_end;uc011wuc.1.tx_end	0	+
chr1	157912768	157912769	pA:Mm.253335.1.10;pas:K+1017;pas:L+669;pas:M+1760	0	+
chr1	157915990	157915991	pA:Mm.253335.1.13;Mm.253335.1.14;pas:B+778;pas:K+1018;pas:K+1019;pas:L+672;pas:L+673;pas:M+1761;pas:T+802;uc007dbx.2.tx_end;uc007dcc.2.tx_end	0	+
chr1	158257400	158257401	pA:pas:K+1022;pas:T+805	0	+
chr1	158258165	158258166	pA:Mm.289099.1.13;uc007dch.1.tx_end	0	+
chr1	158455703	158455704	pA:Mm.23692.1.1	0	+
chr1	158572943	158572944	pA:pas:B+780;pas:M+1764;pas:T+809	0	+
chr1	158579694	158579695	pA:pas:B+781;pas:K+1025;pas:L+676;pas:M+1765;pas:T+810	0	+
chr1	158579749	158579750	pA:pas:B+782;pas:K+1026;pas:L+677;pas:M+1766;pas:T+811;uc007dcl.2.tx_end;uc011wuf.1.tx_end;uc011wug.1.tx_end	0	+
chr1	158724166	158724167	pA:Mm.351273.1.1	0	+
chr1	158775745	158775746	pA:uc007ddc.1.tx_end	0	+
chr1	158791208	158791209	pA:Mm.279007.1.11;uc007ddd.1.tx_end	0	+
chr1	158870325	158870326	pA:Mm.375227.1.1	0	+
chr1	159350370	159350371	pA:Mm.286863.1.7;pas:B+783;pas:K+1027;pas:L+678;pas:M+1777;pas:T+813;uc007ddi.1.tx_end	0	+
chr1	159418863	159418864	pA:uc007ddj.1.tx_end;uc007ddk.1.tx_end	0	+
chr1	159419190	159419191	pA:pas:B+784;pas:K+1029;pas:L+679;pas:T+814	0	+
chr1	159492319	159492320	pA:uc007ddo.1.tx_end	0	+
chr1	159498555	159498556	pA:Mm.87114.1.9;pas:K+1032;pas:L+680;pas:M+1779;pas:T+815;uc007ddl.2.tx_end;uc007ddm.2.tx_end;uc007ddn.2.tx_end	0	+
chr1	160435863	160435864	pA:uc011wuk.1.tx_end	0	+
chr1	160540301	160540302	pA:uc007ddr.2.tx_end	0	+
chr1	160552757	160552758	pA:pas:B+788;pas:K+1033;pas:L+681;pas:M+1784	0	+
chr1	160609620	160609621	pA:uc007dds.2.tx_end	0	+
chr1	160621916	160621917	pA:Mm.329586.1.44;pas:B+791;pas:K+1034;pas:M+1785;uc007ddt.2.tx_end;uc007ddu.2.tx_end	0	+
chr1	161096517	161096518	pA:uc007ddy.1.tx_end	0	+
chr1	161270554	161270555	pA:uc011wul.1.tx_end	0	+
chr1	161275576	161275577	pA:Mm.328135.1.28	0	+
chr1	161277710	161277711	pA:Mm.328135.1.29;uc007ddz.1.tx_end	0	+
chr1	161854385	161854386	pA:Mm.337795.1.12	0	+
chr1	161855052	161855053	pA:uc007dea.2.tx_end	0	+
chr1	161855440	161855441	pA:Mm.337795.1.14	0	+
chr1	161861859	161861860	pA:Mm.44701.1.1	0	+
chr1	162002912	162002913	pA:uc007deb.2.tx_end	0	+
chr1	162005990	162005991	pA:pas:K+1036;pas:L+683;pas:M+1796;pas:T+819	0	+
chr1	162006150	162006151	pA:Mm.171518.1.16;pas:K+1037;pas:T+820	0	+
chr1	162008717	162008718	pA:Mm.171518.1.19;pas:K+1038;pas:M+1799;pas:T+821;uc007dec.2.tx_end	0	+
chr1	162129950	162129951	pA:Mm.29599.1.4;pas:B+804;pas:K+1039;pas:L+684;pas:M+1805;pas:T+822	0	+
chr1	162130202	162130203	pA:Mm.29599.1.6;pas:B+805;pas:K+1040;pas:L+685;pas:M+1806;pas:T+823	0	+
chr1	162131316	162131317	pA:uc007def.1.tx_end	0	+
chr1	162132295	162132296	pA:pas:K+1041;pas:L+686;pas:M+1808	0	+
chr1	162905106	162905107	pA:pas:B+807;pas:K+1048;pas:L+687;pas:M+1814;pas:T+826;uc007del.2.tx_end	0	+
chr1	162932611	162932612	pA:Mm.260770.1.19;pas:L+691;pas:M+1815	0	+
chr1	162932669	162932670	pA:pas:B+808;pas:K+1049;pas:L+692;pas:M+1816;pas:T+827	0	+
chr1	162933083	162933084	pA:Mm.260770.1.20;pas:L+693;pas:M+1817	0	+
chr1	162933145	162933146	pA:Mm.260770.1.21;uc007dem.2.tx_end	0	+
chr1	162935517	162935518	pA:pas:K+1050;pas:L+698	0	+
chr1	162966337	162966338	pA:pas:L+702;pas:T+833	0	+
chr1	162966874	162966875	pA:pas:L+703;pas:T+834	0	+
chr1	162967177	162967178	pA:pas:M+1819;pas:T+835	0	+
chr1	162968167	162968168	pA:uc007det.1.tx_end	0	+
chr1	162968286	162968287	pA:uc011wuo.1.tx_end	0	+
chr1	162968515	162968516	pA:pas:L+704;pas:T+837	0	+
chr1	162968668	162968669	pA:Mm.270065.1.26;pas:B+811;pas:K+1052;pas:L+705;pas:M+1820;pas:T+838;uc007deu.1.tx_end;uc007dev.1.tx_end;uc007dew.1.tx_end;uc007dex.1.tx_end;uc011wun.1.tx_end	0	+
chr1	163013600	163013601	pA:Mm.248212.1.14	0	+
chr1	163016473	163016474	pA:Mm.248212.1.18;pas:B+812;pas:K+1053;pas:L+706;pas:M+1821;pas:T+839;uc007dfa.2.tx_end;uc007dfb.2.tx_end;uc007dfc.2.tx_end;uc007dfd.2.tx_end;uc007dfe.2.tx_end	0	+
chr1	163016854	163016855	pA:Mm.248212.1.19	0	+
chr1	163061818	163061819	pA:pas:B+813;pas:M+1823	0	+
chr1	163081436	163081437	pA:pas:B+814;pas:K+1054	0	+
chr1	163081592	163081593	pA:pas:B+815;pas:K+1055	0	+
chr1	163100637	163100638	pA:pas:B+816;pas:K+1056;uc007dfj.2.tx_end	0	+
chr1	163105209	163105210	pA:pas:B+817;pas:M+1825;pas:T+840	0	+
chr1	163167437	163167438	pA:Mm.380572.1.1	0	+
chr1	163348336	163348337	pA:uc007dfn.2.tx_end	0	+
chr1	163435420	163435421	pA:uc007dfo.2.tx_end	0	+
chr1	163540553	163540554	pA:Mm.362896.1.1	0	+
chr1	163697073	163697074	pA:pas:B+818;pas:K+1057	0	+
chr1	163699995	163699996	pA:pas:K+1058;pas:M+1828	0	+
chr1	163831074	163831075	pA:Mm.329730.1.2;uc007dfv.1.tx_end	0	+
chr1	163901791	163901792	pA:Mm.45106.1.7;pas:B+819;pas:K+1059;pas:L+708;pas:M+1830;pas:M+1831;pas:T+842	0	+
chr1	163903052	163903053	pA:pas:B+820;pas:L+709	0	+
chr1	163903565	163903566	pA:uc007dfx.1.tx_end;uc007dfy.1.tx_end	0	+
chr1	163946615	163946616	pA:uc007dgc.1.tx_end	0	+
chr1	164153340	164153341	pA:Mm.29567.1.2	0	+
chr1	164153834	164153835	pA:Mm.29567.1.3;pas:K+1062;pas:M+1838	0	+
chr1	164155680	164155681	pA:Mm.29567.1.5;uc007dgf.1.tx_end	0	+
chr1	164525056	164525057	pA:pas:B+821;pas:M+1840	0	+
chr1	164525282	164525283	pA:Mm.10699.1.14	0	+
chr1	164525400	164525401	pA:Mm.10699.1.16;pas:B+822;pas:K+1064;pas:L+711;pas:M+1841;uc007dgk.1.tx_end	0	+
chr1	164525500	164525501	pA:Mm.10699.1.17	0	+
chr1	164529214	164529215	pA:Mm.10699.1.20;pas:B+823;pas:K+1065;pas:M+1843;uc007dgl.1.tx_end	0	+
chr1	164579824	164579825	pA:Mm.10694.1.3;pas:B+824;pas:M+1846;uc007dgm.2.tx_end	0	+
chr1	164710703	164710704	pA:pas:K+1066;pas:T+843	0	+
chr1	164803054	164803055	pA:pas:B+827;pas:K+1067;pas:M+1848	0	+
chr1	165724232	165724233	pA:Mm.4651.1.5	0	+
chr1	165846057	165846058	pA:pas:B+829;pas:K+1070;pas:L+715;pas:M+1855	0	+
chr1	165846296	165846297	pA:pas:B+830;pas:K+1071	0	+
chr1	165846463	165846464	pA:pas:B+831;pas:K+1072;pas:M+1856	0	+
chr1	165847233	165847234	pA:Mm.4651.1.50;pas:B+832;pas:K+1073;pas:L+716;pas:M+1857;pas:T+844;uc007dho.1.tx_end;uc007dhp.1.tx_end	0	+
chr1	165851376	165851377	pA:pas:K+1074;pas:M+1858	0	+
chr1	165870442	165870443	pA:Mm.28152.1.9	0	+
chr1	165883880	165883881	pA:Mm.28152.1.27;pas:B+833;pas:L+717	0	+
chr1	165884152	165884153	pA:Mm.28152.1.30;pas:L+718;pas:M+1859;pas:T+845	0	+
chr1	165885256	165885257	pA:Mm.28152.1.31;pas:B+834;pas:K+1076;pas:M+1860;pas:T+846;uc007dhq.1.tx_end;uc007dhr.1.tx_end;uc007dht.1.tx_end;uc011wuu.1.tx_end	0	+
chr1	165927373	165927374	pA:Mm.27284.1.8;pas:B+835;pas:K+1077;pas:L+719;pas:M+1861;pas:T+848;uc007dhv.1.tx_end;uc007dhw.1.tx_end	0	+
chr1	165987807	165987808	pA:uc007dhx.1.tx_end	0	+
chr1	166010134	166010135	pA:Mm.1461.1.14;pas:L+720;pas:M+1862;pas:T+849	0	+
chr1	166010802	166010803	pA:Mm.1461.1.16;pas:K+1078;pas:M+1863;pas:T+850	0	+
chr1	166010915	166010916	pA:Mm.1461.1.17;uc007dhy.2.tx_end;uc011wuv.1.tx_end;uc011wuw.1.tx_end	0	+
chr1	166013054	166013055	pA:pas:K+1079;pas:M+1865	0	+
chr1	166079268	166079269	pA:Mm.3337.1.3	0	+
chr1	166079875	166079876	pA:Mm.3337.1.5;uc007dhz.1.tx_end;uc007dia.1.tx_end	0	+
chr1	166150406	166150407	pA:pas:B+836;pas:K+1080;pas:L+724;pas:M+1868;pas:T+852;uc007dic.1.tx_end	0	+
chr1	166195498	166195499	pA:Mm.35444.1.11;pas:B+837;pas:K+1081;pas:L+727;pas:M+1870;pas:T+853;uc007did.1.tx_end;uc007die.1.tx_end	0	+
chr1	166196893	166196894	pA:pas:K+1082;pas:L+728	0	+
chr1	166217977	166217978	pA:Mm.167258.1.21;pas:B+838;pas:K+1083;pas:L+729;pas:M+1871;pas:T+855;uc007dif.2.tx_end	0	+
chr1	166279565	166279566	pA:uc007dik.1.tx_end	0	+
chr1	166310988	166310989	pA:uc007dil.1.tx_end	0	+
chr1	166367428	166367429	pA:Mm.219428.1.26;pas:K+1085;pas:M+1872;uc007dim.2.tx_end;uc007din.2.tx_end;uc007dio.2.tx_end	0	+
chr1	166367484	166367485	pA:Mm.219428.1.27	0	+
chr1	166394613	166394614	pA:pas:B+839;pas:K+1091;pas:L+731;pas:M+1873;pas:T+856	0	+
chr1	166753561	166753562	pA:pas:K+1095;pas:L+733;pas:M+1875;pas:T+857	0	+
chr1	166754396	166754397	pA:Mm.28935.1.11;pas:K+1096;pas:L+734;pas:M+1876;pas:T+858;uc007diq.1.tx_end	0	+
chr1	166801568	166801569	pA:uc007dir.1.tx_end	0	+
chr1	166891529	166891530	pA:uc007dit.1.tx_end	0	+
chr1	166892954	166892955	pA:uc007diu.1.tx_end	0	+
chr1	166897255	166897256	pA:pas:B+840;pas:T+859	0	+
chr1	166970706	166970707	pA:pas:K+1098;pas:M+1882	0	+
chr1	167099870	167099871	pA:pas:K+1100;pas:T+860	0	+
chr1	167167891	167167892	pA:pas:L+735;pas:T+861	0	+
chr1	167251981	167251982	pA:uc007dja.1.tx_end;uc011wux.1.tx_end;uc011wuy.1.tx_end	0	+
chr1	167256875	167256876	pA:Mm.380503.1.1	0	+
chr1	167393779	167393780	pA:pas:M+1886;pas:T+862	0	+
chr1	167394781	167394782	pA:pas:B+842;pas:M+1887;uc007djc.1.tx_end	0	+
chr1	167411249	167411250	pA:Mm.195625.1.6;pas:B+843;pas:K+1101;pas:L+737;pas:M+1888;pas:T+863	0	+
chr1	167411345	167411346	pA:pas:B+844;pas:K+1102;pas:L+738;pas:M+1889;uc007djd.1.tx_end	0	+
chr1	167473457	167473458	pA:uc011wva.1.tx_end	0	+
chr1	167505928	167505929	pA:Mm.66952.1.6	0	+
chr1	167506534	167506535	pA:uc007dje.1.tx_end	0	+
chr1	167506903	167506904	pA:uc007djf.1.tx_end;uc011wuz.1.tx_end	0	+
chr1	167700888	167700889	pA:pas:B+845;pas:L+739;pas:M+1894	0	+
chr1	167703064	167703065	pA:pas:B+846;pas:K+1104;pas:M+1895	0	+
chr1	167704137	167704138	pA:pas:K+1105;pas:L+740;pas:M+1896	0	+
chr1	167704241	167704242	pA:Mm.294885.1.5;pas:B+847;pas:K+1106;pas:K+1107;pas:L+741;pas:M+1897;pas:M+1898;pas:T+864;pas:T+865	0	+
chr1	167704651	167704652	pA:pas:L+742;pas:M+1899	0	+
chr1	167705439	167705440	pA:Mm.294885.1.10;pas:B+848;pas:K+1108;pas:L+743;pas:M+1900;pas:T+866;uc007djm.1.tx_end;uc011wvb.1.tx_end	0	+
chr1	167792198	167792199	pA:Mm.217308.1.9;pas:M+1903;pas:T+869	0	+
chr1	167792242	167792243	pA:uc007djn.2.tx_end	0	+
chr1	167797566	167797567	pA:uc007djo.2.tx_end	0	+
chr1	167801283	167801284	pA:uc007djp.2.tx_end;uc007djq.2.tx_end;uc007djr.2.tx_end	0	+
chr1	167807406	167807407	pA:pas:K+1109;pas:M+1905;uc007djs.1.tx_end	0	+
chr1	167909102	167909103	pA:Mm.380574.1.1	0	+
chr1	167977110	167977111	pA:Mm.223748.1.1	0	+
chr1	168096640	168096641	pA:Mm.46357.1.19;pas:K+1110;pas:T+871;uc007dkj.1.tx_end	0	+
chr1	168202683	168202684	pA:pas:K+1111;pas:L+744	0	+
chr1	168242429	168242430	pA:pas:K+1112;pas:L+745	0	+
chr1	168246962	168246963	pA:pas:B+849;pas:K+1113;pas:L+746;pas:M+1911;uc011wvd.1.tx_end;uc011wve.1.tx_end;uc011wvf.1.tx_end;uc011wvg.1.tx_end;uc011wvh.1.tx_end;uc011wvi.1.tx_end;uc011wvj.1.tx_end	0	+
chr1	168250682	168250683	pA:pas:B+850;pas:K+1114	0	+
chr1	168314238	168314239	pA:uc007dkl.2.tx_end	0	+
chr1	168323170	168323171	pA:pas:B+852;pas:K+1115	0	+
chr1	168323751	168323752	pA:Mm.100665.1.25;pas:B+853;pas:K+1116;pas:L+747;pas:M+1913;pas:T+872;uc007dkm.2.tx_end	0	+
chr1	168888462	168888463	pA:Mm.362771.1.1	0	+
chr1	169009412	169009413	pA:pas:B+854;pas:K+1117;pas:M+1918	0	+
chr1	169009950	169009951	pA:Mm.216842.1.8	0	+
chr1	169021136	169021137	pA:Mm.216842.1.12	0	+
chr1	169021432	169021433	pA:uc007dks.2.tx_end;uc007dkt.2.tx_end;uc011wvo.1.tx_end	0	+
chr1	169197002	169197003	pA:pas:B+857;pas:T+873	0	+
chr1	169260915	169260916	pA:Mm.330045.1.12;pas:B+858;pas:K+1119;pas:L+749;pas:M+1925;pas:T+874	0	+
chr1	169264108	169264109	pA:uc007dkv.1.tx_end	0	+
chr1	169298236	169298237	pA:pas:K+1120;pas:L+751;pas:M+1927	0	+
chr1	169298416	169298417	pA:Mm.330055.1.27;pas:B+860;pas:K+1121;pas:L+752;pas:M+1928;pas:T+875	0	+
chr1	169298662	169298663	pA:pas:B+861;pas:K+1122;pas:L+753;pas:M+1929;uc007dkx.1.tx_end	0	+
chr1	169569556	169569557	pA:pas:B+862;pas:K+1123;pas:L+754;pas:M+1931;pas:T+877	0	+
chr1	169569753	169569754	pA:Mm.3475.1.16;pas:B+863;pas:K+1124;pas:L+755;pas:M+1932;uc007dla.2.tx_end;uc007dlb.2.tx_end	0	+
chr1	169778871	169778872	pA:Mm.330081.1.8;uc007dlc.1.tx_end	0	+
chr1	170937118	170937119	pA:pas:M+1938;pas:M+1939	0	+
chr1	171614076	171614077	pA:Mm.20954.1.3	0	+
chr1	171622746	171622747	pA:Mm.20954.1.11	0	+
chr1	171623656	171623657	pA:uc007dlm.1.tx_end	0	+
chr1	171625833	171625834	pA:pas:B+866;pas:K+1127;pas:L+756;pas:M+1944	0	+
chr1	171625928	171625929	pA:Mm.20954.1.17;Mm.375744.1.1;pas:B+867;pas:K+1128;pas:L+757;pas:M+1945	0	+
chr1	171679992	171679993	pA:Mm.362238.1.1	0	+
chr1	171864783	171864784	pA:uc007dlo.1.tx_end;uc011wvq.1.tx_end	0	+
chr1	171902525	171902526	pA:pas:K+1130;pas:L+758;pas:M+1948;uc007dlr.1.tx_end;uc007dls.1.tx_end	0	+
chr1	172181717	172181718	pA:uc007dmb.1.tx_end	0	+
chr1	172215792	172215793	pA:uc007dmc.1.tx_end	0	+
chr1	172242258	172242259	pA:pas:M+1951;pas:T+882;uc007dmd.1.tx_end	0	+
chr1	172244901	172244902	pA:pas:K+1132;pas:L+759	0	+
chr1	172612919	172612920	pA:Mm.287131.1.18;uc007dmi.2.tx_end	0	+
chr1	172809550	172809551	pA:pas:B+875;pas:K+1137	0	+
chr1	172855384	172855385	pA:pas:B+876;pas:K+1139;pas:L+761;pas:M+1958;pas:T+884	0	+
chr1	172916596	172916597	pA:pas:K+1140;pas:M+1960	0	+
chr1	172959577	172959578	pA:pas:L+762;pas:M+1961	0	+
chr1	172959891	172959892	pA:Mm.251254.1.7;pas:K+1141;pas:L+763;pas:M+1962;uc007dmw.2.tx_end	0	+
chr1	173057097	173057098	pA:Mm.32760.1.9;pas:K+1142;pas:M+1963;pas:T+886;uc007dna.1.tx_end	0	+
chr1	173091255	173091256	pA:Mm.9986.1.18;pas:B+879;pas:T+889;uc007dnc.1.tx_end;uc007dnd.1.tx_end	0	+
chr1	173148976	173148977	pA:Mm.3077.1.9;pas:L+765;pas:M+1965;uc007dnf.1.tx_end;uc007dng.1.tx_end;uc011wvx.1.tx_end;uc011wvy.1.tx_end	0	+
chr1	173149323	173149324	pA:uc007dnh.1.tx_end	0	+
chr1	173156509	173156510	pA:Mm.43677.1.5;pas:B+880;pas:K+1143;pas:L+770;pas:M+1967;pas:T+890;uc007dnk.2.tx_end	0	+
chr1	173190071	173190072	pA:Mm.23156.1.8;pas:B+881;pas:M+1968;pas:T+893;uc007dnn.1.tx_end;uc007dno.1.tx_end	0	+
chr1	173192386	173192387	pA:pas:B+882;pas:K+1145;pas:L+772;pas:M+1969	0	+
chr1	173207026	173207027	pA:Mm.274011.1.28;pas:B+883;pas:K+1146;pas:L+773;pas:M+1970;pas:T+894;uc007dnp.2.tx_end;uc007dnq.2.tx_end;uc007dnr.2.tx_end	0	+
chr1	173254954	173254955	pA:pas:B+884;pas:K+1147;pas:L+775;pas:M+1972;pas:T+896	0	+
chr1	173268754	173268755	pA:Mm.270139.1.3	0	+
chr1	173271427	173271428	pA:pas:K+1150;pas:M+1975;pas:T+897	0	+
chr1	173271746	173271747	pA:Mm.270139.1.18;Mm.270139.1.19;pas:B+885;pas:K+1151;pas:L+776;pas:M+1976;pas:T+898	0	+
chr1	173271821	173271822	pA:Mm.270139.1.20;pas:B+886;pas:K+1152;pas:L+777;pas:M+1977;pas:T+899	0	+
chr1	173272465	173272466	pA:pas:B+887;pas:K+1153;pas:L+778;pas:M+1978	0	+
chr1	173272631	173272632	pA:uc007dnx.2.tx_end;uc007dny.2.tx_end;uc007dnz.2.tx_end	0	+
chr1	173273407	173273408	pA:pas:B+888;pas:K+1154;pas:L+779;pas:M+1979;pas:T+900	0	+
chr1	173274561	173274562	pA:pas:B+889;pas:K+1155;pas:M+1980	0	+
chr1	173288300	173288301	pA:Mm.10756.1.7;pas:B+890;pas:K+1156;pas:L+780;pas:M+1981;pas:T+901;uc007doc.1.tx_end	0	+
chr1	173289038	173289039	pA:pas:K+1157;pas:L+781;pas:M+1983	0	+
chr1	173289384	173289385	pA:pas:B+892;pas:K+1158;pas:L+782;pas:M+1984;pas:T+902	0	+
chr1	173317668	173317669	pA:Mm.263414.1.13	0	+
chr1	173318418	173318419	pA:Mm.263414.1.14;pas:B+893;pas:T+903;uc007doe.2.tx_end;uc007dof.2.tx_end;uc011wwc.1.tx_end	0	+
chr1	173340370	173340371	pA:Mm.251048.1.9;uc007doh.2.tx_end	0	+
chr1	173340428	173340429	pA:uc007doi.2.tx_end	0	+
chr1	173348887	173348888	pA:Mm.8.1.19;pas:B+894;pas:K+1159;pas:L+783;pas:T+904;uc007doj.1.tx_end;uc007dok.1.tx_end;uc007dol.1.tx_end;uc007dom.1.tx_end	0	+
chr1	173350482	173350483	pA:Mm.46366.1.5;pas:B+895;pas:K+1160;pas:L+784;pas:M+1986;pas:T+905;uc011wwd.1.tx_end	0	+
chr1	173393379	173393380	pA:pas:K+1162;pas:L+785;pas:T+907	0	+
chr1	173394141	173394142	pA:Mm.294882.1.28;pas:B+896;pas:K+1165;pas:L+787;pas:M+1987;pas:T+908	0	+
chr1	173394733	173394734	pA:Mm.294882.1.29;uc007doo.1.tx_end	0	+
chr1	173434880	173434881	pA:uc007dop.1.tx_end	0	+
chr1	173447047	173447048	pA:uc011wwe.1.tx_end	0	+
chr1	173508380	173508381	pA:uc007dor.1.tx_end	0	+
chr1	173513688	173513689	pA:Mm.2299.1.11;uc011wwf.1.tx_end	0	+
chr1	173515446	173515447	pA:uc007dos.1.tx_end	0	+
chr1	173635330	173635331	pA:pas:M+1990;pas:T+910	0	+
chr1	173635387	173635388	pA:pas:K+1168;pas:M+1991;pas:T+911;uc007doz.1.tx_end;uc007dpa.1.tx_end	0	+
chr1	173723207	173723208	pA:uc007dpb.1.tx_end	0	+
chr1	173723259	173723260	pA:pas:K+1169;pas:L+788;pas:T+912	0	+
chr1	173730716	173730717	pA:Mm.103648.1.15	0	+
chr1	173731314	173731315	pA:Mm.103648.1.16;uc007dpc.1.tx_end	0	+
chr1	173735182	173735183	pA:pas:M+1993;pas:T+915	0	+
chr1	173783249	173783250	pA:uc007dpd.2.tx_end	0	+
chr1	173819208	173819209	pA:pas:L+789;pas:M+1994;pas:T+916	0	+
chr1	173820848	173820849	pA:uc007dpe.2.tx_end;uc007dpf.2.tx_end	0	+
chr1	173874040	173874041	pA:Mm.245727.1.8;pas:K+1170;pas:M+1996;pas:M+1997;pas:T+918;pas:T+919;uc007dpg.1.tx_end	0	+
chr1	173878205	173878206	pA:uc011wwh.1.tx_end	0	+
chr1	173879088	173879089	pA:Mm.245727.1.10;pas:M+1998;pas:T+920	0	+
chr1	173883300	173883301	pA:Mm.245727.1.12;uc007dph.1.tx_end	0	+
chr1	174023690	174023691	pA:uc007dpl.2.tx_end	0	+
chr1	174041806	174041807	pA:pas:K+1171;pas:M+2001	0	+
chr1	174045698	174045699	pA:uc007dpo.1.tx_end	0	+
chr1	174052246	174052247	pA:Mm.30041.1.66;pas:B+897;pas:K+1172;pas:L+790;pas:M+2002;pas:T+923	0	+
chr1	174052462	174052463	pA:Mm.30041.1.67;pas:B+898;pas:K+1173;pas:L+791;pas:M+2003;pas:T+924;uc007dpn.2.tx_end;uc007dpp.2.tx_end	0	+
chr1	174061026	174061027	pA:Mm.247764.1.10	0	+
chr1	174061144	174061145	pA:pas:K+1174;pas:M+2004	0	+
chr1	174065413	174065414	pA:Mm.247764.1.23;pas:B+899;pas:K+1175;pas:L+792;pas:M+2006;pas:T+926	0	+
chr1	174065669	174065670	pA:Mm.247764.1.24;Mm.247764.1.25;pas:B+900;pas:K+1176;pas:M+2007	0	+
chr1	174065796	174065797	pA:pas:K+1177;pas:M+2008	0	+
chr1	174065906	174065907	pA:Mm.247764.1.26;pas:B+901;pas:K+1178;pas:L+793;pas:M+2009;pas:T+927	0	+
chr1	174066627	174066628	pA:uc007dpq.2.tx_end;uc011wwj.1.tx_end	0	+
chr1	174069098	174069099	pA:pas:B+902;pas:K+1179	0	+
chr1	174103560	174103561	pA:uc007dpr.2.tx_end	0	+
chr1	174118711	174118712	pA:uc007dps.2.tx_end	0	+
chr1	174119938	174119939	pA:uc007dpt.2.tx_end	0	+
chr1	174124924	174124925	pA:Mm.159915.1.29	0	+
chr1	174125597	174125598	pA:Mm.159915.1.38;pas:B+904;pas:K+1181;pas:L+795;pas:M+2015;pas:T+929	0	+
chr1	174125685	174125686	pA:pas:K+1182;pas:L+796;pas:M+2016	0	+
chr1	174126523	174126524	pA:Mm.159915.1.39;pas:B+905;pas:K+1183;pas:L+797;pas:M+2018;pas:T+930;uc007dpu.2.tx_end;uc007dpv.2.tx_end;uc007dpw.2.tx_end;uc007dpx.2.tx_end	0	+
chr1	174143810	174143811	pA:pas:B+907;pas:M+2019	0	+
chr1	174249970	174249971	pA:Mm.271717.1.35;pas:B+910;pas:K+1185;pas:L+799;pas:M+2020;pas:T+934;uc007dqb.1.tx_end;uc007dqe.1.tx_end	0	+
chr1	174304215	174304216	pA:Mm.254563.1.11;pas:B+912;pas:K+1188;uc007dqj.1.tx_end	0	+
chr1	174308631	174308632	pA:Mm.26612.1.1	0	+
chr1	174308711	174308712	pA:Mm.26612.1.2;pas:K+1189;pas:L+800;pas:M+2021;pas:T+936	0	+
chr1	174309181	174309182	pA:Mm.26612.1.3;Mm.26612.1.4;pas:K+1190;pas:M+2023;pas:T+937	0	+
chr1	174309283	174309284	pA:Mm.26612.1.5	0	+
chr1	174314082	174314083	pA:pas:K+1193;pas:L+801;pas:M+2024	0	+
chr1	174314229	174314230	pA:pas:B+913;pas:K+1194;pas:L+802;pas:M+2025;uc007dqk.2.tx_end	0	+
chr1	174380062	174380063	pA:pas:B+915;pas:K+1196;pas:L+803;pas:M+2026;pas:T+938	0	+
chr1	174408539	174408540	pA:Mm.150050.1.9;pas:K+1197;pas:L+804;pas:M+2027;pas:T+939;uc007dql.2.tx_end	0	+
chr1	174421175	174421176	pA:uc007dqm.2.tx_end	0	+
chr1	174429007	174429008	pA:Mm.214530.1.57;pas:K+1198;pas:T+941;uc007dqn.2.tx_end;uc011wwm.1.tx_end;uc011wwn.1.tx_end	0	+
chr1	174437509	174437510	pA:pas:B+916;pas:K+1199;pas:L+805;pas:M+2029;pas:T+943;uc007dqp.1.tx_end	0	+
chr1	174476000	174476001	pA:uc007dqq.2.tx_end	0	+
chr1	174493847	174493848	pA:Mm.71940.1.9;pas:B+917;pas:K+1202;pas:M+2030;pas:T+944;uc007dqs.2.tx_end;uc007dqt.2.tx_end	0	+
chr1	174630096	174630097	pA:Mm.28767.1.10;pas:K+1203;pas:L+810;pas:M+2032;pas:T+945;uc011wwq.1.tx_end	0	+
chr1	174887947	174887948	pA:uc007dqz.2.tx_end	0	+
chr1	175134429	175134430	pA:uc007drc.1.tx_end	0	+
chr1	175146770	175146771	pA:uc007drd.2.tx_end	0	+
chr1	175201267	175201268	pA:uc007drf.2.tx_end	0	+
chr1	175377113	175377114	pA:pas:M+2033;pas:T+946	0	+
chr1	175395834	175395835	pA:pas:K+1205;pas:L+815;pas:M+2034;pas:T+947	0	+
chr1	175396166	175396167	pA:uc011wws.1.tx_end	0	+
chr1	175578058	175578059	pA:uc007drr.2.tx_end;uc011wwu.1.tx_end	0	+
chr1	175610462	175610463	pA:uc007drs.1.tx_end	0	+
chr1	175628522	175628523	pA:pas:M+2037;pas:T+949;uc007drt.1.tx_end	0	+
chr1	175973066	175973067	pA:uc007dsn.2.tx_end	0	+
chr1	175981443	175981444	pA:uc007dso.1.tx_end	0	+
chr1	176000383	176000384	pA:uc007dsp.1.tx_end	0	+
chr1	176020110	176020111	pA:uc007dsq.2.tx_end	0	+
chr1	176030537	176030538	pA:uc007dsr.1.tx_end	0	+
chr1	176067823	176067824	pA:uc007dst.1.tx_end	0	+
chr1	176082660	176082661	pA:uc011wwy.1.tx_end	0	+
chr1	176089897	176089898	pA:uc007dsv.2.tx_end	0	+
chr1	176121710	176121711	pA:pas:B+918;pas:K+1206	0	+
chr1	176178084	176178085	pA:Mm.200611.1.16	0	+
chr1	176178197	176178198	pA:pas:K+1207;pas:M+2042	0	+
chr1	176178579	176178580	pA:uc007dsw.2.tx_end	0	+
chr1	176263007	176263008	pA:Mm.7150.1.5;uc007dsy.2.tx_end	0	+
chr1	176299978	176299979	pA:uc007dsz.1.tx_end	0	+
chr1	176322185	176322186	pA:uc007dta.2.tx_end	0	+
chr1	176361514	176361515	pA:uc007dtb.2.tx_end	0	+
chr1	176379732	176379733	pA:uc011wwz.1.tx_end	0	+
chr1	176596843	176596844	pA:uc011wxa.1.tx_end	0	+
chr1	176630538	176630539	pA:uc007dte.1.tx_end	0	+
chr1	176751778	176751779	pA:Mm.330620.1.15	0	+
chr1	176752859	176752860	pA:uc007dtd.2.tx_end;uc011wxb.1.tx_end	0	+
chr1	177508545	177508546	pA:uc007dtm.1.tx_end	0	+
chr1	177584228	177584229	pA:uc007dto.1.tx_end	0	+
chr1	177588749	177588750	pA:pas:K+1208;pas:L+819	0	+
chr1	177590278	177590279	pA:pas:K+1209;pas:L+821	0	+
chr1	177590804	177590805	pA:pas:K+1210;pas:L+822	0	+
chr1	177590983	177590984	pA:Mm.27217.1.22;pas:K+1211;pas:L+823;uc007dtp.1.tx_end;uc011wxc.1.tx_end;uc011wxd.1.tx_end	0	+
chr1	177592247	177592248	pA:pas:K+1212;pas:L+824;pas:M+2045	0	+
chr1	177736172	177736173	pA:uc011wxf.1.tx_end	0	+
chr1	177745864	177745865	pA:Mm.50361.1.6;uc007dtt.2.tx_end;uc011wxe.1.tx_end	0	+
chr1	177838867	177838868	pA:Mm.283046.1.24;pas:K+1214;pas:T+954	0	+
chr1	177841526	177841527	pA:uc007dtu.2.tx_end	0	+
chr1	178545571	178545572	pA:Mm.374316.1.1	0	+
chr1	178665615	178665616	pA:Mm.369385.1.1	0	+
chr1	178775627	178775628	pA:uc007duh.1.tx_end	0	+
chr1	178792244	178792245	pA:uc007dui.1.tx_end	0	+
chr1	178878460	178878461	pA:Mm.171399.1.19	0	+
chr1	178878519	178878520	pA:uc011wxh.1.tx_end	0	+
chr1	178886492	178886493	pA:pas:B+923;pas:M+2047	0	+
chr1	178934494	178934495	pA:pas:K+1217;pas:M+2048	0	+
chr1	178950321	178950322	pA:pas:B+924;pas:K+1218;pas:L+826;pas:M+2049	0	+
chr1	178950566	178950567	pA:Mm.171399.1.25;pas:B+925;pas:K+1219;pas:L+827;pas:M+2050;pas:T+956;uc007duj.1.tx_end	0	+
chr1	179380896	179380897	pA:Mm.330700.1.17;pas:B+928;pas:K+1221;pas:L+828;pas:M+2054;pas:T+959;uc007dul.1.tx_end;uc007dum.1.tx_end;uc007dun.1.tx_end;uc011wxi.1.tx_end	0	+
chr1	179391333	179391334	pA:uc007duo.1.tx_end	0	+
chr1	179406397	179406398	pA:uc007dup.1.tx_end	0	+
chr1	179683447	179683448	pA:Mm.84467.1.3;pas:K+1223;pas:M+2056;uc007dur.1.tx_end	0	+
chr1	179916362	179916363	pA:pas:B+930;pas:M+2058	0	+
chr1	179920582	179920583	pA:pas:K+1225;pas:M+2059	0	+
chr1	179978421	179978422	pA:uc007duv.2.tx_end	0	+
chr1	180080092	180080093	pA:uc011wxj.1.tx_end	0	+
chr1	180102834	180102835	pA:uc007duw.2.tx_end	0	+
chr1	180180721	180180722	pA:pas:L+830;pas:M+2063;pas:M+2064	0	+
chr1	180180772	180180773	pA:Mm.26611.1.16	0	+
chr1	180181031	180181032	pA:pas:K+1227;pas:M+2065	0	+
chr1	180181124	180181125	pA:Mm.26611.1.18	0	+
chr1	180182215	180182216	pA:Mm.26611.1.19	0	+
chr1	180182727	180182728	pA:Mm.26611.1.20;pas:B+932;pas:K+1229;pas:M+2067;pas:T+960;uc007dux.1.tx_end;uc011wxk.1.tx_end	0	+
chr1	180187414	180187415	pA:pas:B+933;pas:K+1230;pas:L+831;pas:M+2068	0	+
chr1	180229992	180229993	pA:Mm.18516.1.1	0	+
chr1	180230296	180230297	pA:Mm.18516.1.2	0	+
chr1	180252273	180252274	pA:pas:K+1234;pas:L+832;pas:M+2069	0	+
chr1	180252713	180252714	pA:Mm.86589.1.5	0	+
chr1	180252823	180252824	pA:Mm.86589.1.6;pas:B+934;pas:K+1235;pas:L+833;pas:L+834;pas:M+2071;pas:M+2072;pas:T+962;uc007duz.1.tx_end	0	+
chr1	180252911	180252912	pA:pas:B+935;pas:K+1237;pas:L+835;pas:M+2073;pas:T+963	0	+
chr1	180258822	180258823	pA:pas:K+1238;pas:T+964	0	+
chr1	180263816	180263817	pA:pas:K+1241;pas:M+2075	0	+
chr1	180271600	180271601	pA:pas:B+936;pas:M+2076	0	+
chr1	180275173	180275174	pA:pas:B+937;pas:M+2077	0	+
chr1	180336145	180336146	pA:Mm.252132.1.1	0	+
chr1	180337065	180337066	pA:pas:K+1243;pas:M+2078;pas:T+967	0	+
chr1	180411573	180411574	pA:Mm.252132.1.8;pas:K+1244;pas:M+2080	0	+
chr1	180411644	180411645	pA:pas:B+938;pas:K+1245;pas:L+837;pas:M+2081	0	+
chr1	180412127	180412128	pA:pas:B+939;pas:K+1246;pas:L+838;pas:M+2083	0	+
chr1	180413379	180413380	pA:uc007dve.1.tx_end	0	+
chr1	180414648	180414649	pA:Mm.252132.1.13;pas:B+940;pas:L+839;pas:M+2085	0	+
chr1	180414784	180414785	pA:pas:B+941;pas:K+1247;pas:L+840;pas:M+2086	0	+
chr1	180646630	180646631	pA:uc007dvf.1.tx_end	0	+
chr1	180862987	180862988	pA:Mm.138659.1.4;pas:B+944;pas:M+2092;pas:T+970;uc007dvh.2.tx_end	0	+
chr1	180869330	180869331	pA:Mm.129727.1.1;pas:B+945;pas:K+1248;pas:M+2093;uc007dvi.1.tx_end	0	+
chr1	181509968	181509969	pA:pas:B+949;pas:M+2095	0	+
chr1	181513066	181513067	pA:uc007dvm.1.tx_end	0	+
chr1	181532460	181532461	pA:uc007dvn.1.tx_end	0	+
chr1	181556483	181556484	pA:Mm.87662.1.29	0	+
chr1	181557604	181557605	pA:Mm.87662.1.31;pas:B+950;pas:K+1249;pas:L+841;pas:M+2097;pas:T+972;uc007dvo.1.tx_end	0	+
chr1	181611682	181611683	pA:Mm.136458.1.14	0	+
chr1	181616963	181616964	pA:Mm.136458.1.22;pas:B+951;pas:K+1250;pas:M+2099;pas:T+973	0	+
chr1	181617316	181617317	pA:Mm.136458.1.26;pas:B+952;pas:K+1251;pas:M+2100;pas:T+974;uc007dvp.1.tx_end	0	+
chr1	182031402	182031403	pA:uc007dvs.2.tx_end	0	+
chr1	182046437	182046438	pA:uc007dvv.1.tx_end	0	+
chr1	182092715	182092716	pA:Mm.259655.1.40;pas:B+953;pas:K+1253	0	+
chr1	182095733	182095734	pA:Mm.259655.1.41;pas:B+954;pas:K+1254;pas:K+1255;pas:M+2106;uc007dvu.2.tx_end;uc007dvw.2.tx_end	0	+
chr1	182195679	182195680	pA:pas:B+955;pas:K+1257;pas:L+843;pas:M+2109	0	+
chr1	182212427	182212428	pA:pas:K+1258;pas:M+2110	0	+
chr1	182353575	182353576	pA:pas:B+956;pas:T+980	0	+
chr1	182353789	182353790	pA:uc007dwg.1.tx_end	0	+
chr1	182354928	182354929	pA:pas:B+957;pas:K+1261;pas:L+844;pas:M+2112;pas:T+981	0	+
chr1	182357331	182357332	pA:pas:B+958;pas:K+1262;pas:L+845;pas:M+2113	0	+
chr1	182476871	182476872	pA:pas:K+1263;pas:T+982	0	+
chr1	182509498	182509499	pA:Mm.277779.1.5;pas:B+960;pas:K+1264;pas:L+846;pas:M+2115;pas:T+983	0	+
chr1	182510710	182510711	pA:Mm.277779.1.7	0	+
chr1	182531130	182531131	pA:Mm.277779.1.58;pas:B+961;pas:K+1265;pas:L+847;pas:M+2116;pas:T+984	0	+
chr1	182531384	182531385	pA:Mm.277779.1.61;pas:B+962;pas:K+1266;pas:L+848;pas:M+2117;pas:T+985;uc007dwi.1.tx_end	0	+
chr1	182604274	182604275	pA:uc007dwj.2.tx_end	0	+
chr1	182605158	182605159	pA:uc007dwk.2.tx_end	0	+
chr1	182611756	182611757	pA:uc007dwl.2.tx_end	0	+
chr1	182618997	182618998	pA:uc007dwn.1.tx_end	0	+
chr1	182620817	182620818	pA:Mm.275044.1.24;pas:K+1268;pas:M+2123;uc007dwm.2.tx_end;uc007dwo.1.tx_end;uc011wxp.1.tx_end	0	+
chr1	182621582	182621583	pA:Mm.288804.1.1	0	+
chr1	182664636	182664637	pA:Mm.272981.1.6	0	+
chr1	182682562	182682563	pA:Mm.272981.1.17	0	+
chr1	182684046	182684047	pA:Mm.272981.1.23	0	+
chr1	182684334	182684335	pA:Mm.272981.1.24;Mm.272981.1.25;pas:B+964;pas:K+1269;pas:L+850;pas:M+2125;pas:M+2126;uc007dwq.2.tx_end	0	+
chr1	182686212	182686213	pA:Mm.182664.1.1	0	+
chr1	182722767	182722768	pA:pas:K+1270;pas:M+2129	0	+
chr1	182775270	182775271	pA:pas:K+1272;pas:M+2134;pas:T+989	0	+
chr1	182786046	182786047	pA:Mm.272625.1.1	0	+
chr1	182798244	182798245	pA:Mm.272625.1.20;pas:B+965;pas:K+1273;pas:L+852;pas:M+2137;pas:T+992;uc007dwt.1.tx_end	0	+
chr1	182829233	182829234	pA:Mm.87078.1.5;uc007dwu.1.tx_end	0	+
chr1	182838086	182838087	pA:Mm.274180.1.19;pas:B+967;pas:K+1274;pas:M+2138;pas:T+993	0	+
chr1	182838218	182838219	pA:Mm.274180.1.20;pas:B+968;pas:K+1275;pas:M+2139;pas:T+994;uc007dwv.2.tx_end	0	+
chr1	182868531	182868532	pA:Mm.378911.1.11;uc007dww.1.tx_end	0	+
chr1	182904754	182904755	pA:Mm.185518.1.30	0	+
chr1	182905242	182905243	pA:Mm.185518.1.34;pas:B+969;pas:K+1276;pas:L+853;pas:M+2142;pas:T+998;uc007dwx.1.tx_end;uc007dwy.1.tx_end	0	+
chr1	182990797	182990798	pA:uc007dxa.1.tx_end	0	+
chr1	182990874	182990875	pA:pas:K+1277;pas:L+854	0	+
chr1	183096544	183096545	pA:Mm.38229.1.4;pas:B+971;pas:K+1278;pas:L+858;pas:M+2144;pas:T+1001	0	+
chr1	183097542	183097543	pA:Mm.38229.1.9	0	+
chr1	183097679	183097680	pA:Mm.38229.1.10	0	+
chr1	183099124	183099125	pA:Mm.38229.1.11;pas:B+972;pas:K+1279;pas:M+2145;pas:T+1002;uc007dxe.2.tx_end;uc011wxr.1.tx_end	0	+
chr1	183158628	183158629	pA:Mm.258319.1.1;pas:L+859;pas:M+2147	0	+
[truncated: 71,936 more rows]
