# Supplementary material for: Microarray Meta-Analysis of RNA-Binding Protein Functions in Alternative Polyadenylation
Source: PLoS One. 2014 Mar 12;9(3):e90774. doi: 10.1371/journal.pone.0090774 (PMC3951239; doi:10.1371/journal.pone.0090774)
Supplement: Table S2 — Sub-UTR database for mouse Mm9 genome. (XLSX) [file pone.0090774.s002.xlsx]

## Sheet: table_s2
chr	start	end	subUTR.id	score	strand
chr1	3195985	3196975	u:1	0	-
chr1	3196976	3197398	u:2	0	-
chr1	3203519	3204562	u:3	0	-
chr1	3204563	3206102	u:4	0	-
chr1	3638392	3640590	u:5	0	-
chr1	3648927	3648985	u:6	0	-
chr1	4280927	4283061	u:7	0	-
chr1	4333588	4334230	u:8	0	-
chr1	4334231	4334680	u:9	0	-
chr1	4481009	4481461	u:10	0	-
chr1	4481462	4481796	u:11	0	-
chr1	4763279	4764013	u:12	0	-
chr1	4764014	4764375	u:13	0	-
chr1	4764376	4764509	u:14	0	-
chr1	4764510	4766458	u:15	0	-
chr1	4766459	4766544	u:16	0	-
chr1	4767605	4767729	u:17	0	-
chr1	4769881	4771472	u:18	0	-
chr1	4771473	4772814	u:19	0	-
chr1	4775653	4775807	u:20	0	-
chr1	4899656	4900136	u:21	0	-
chr1	4900137	4900554	u:22	0	-
chr1	5159377	5159402	u:23	0	-
chr1	5903788	5906384	u:24	0	-
chr1	7339487	7340471	u:25	0	-
chr1	7341851	7341975	u:26	0	-
chr1	7365969	7366088	u:27	0	-
chr1	7370466	7370572	u:28	0	-
chr1	7372107	7372163	u:29	0	-
chr1	7373724	7373921	u:30	0	-
chr1	7387798	7387950	u:31	0	-
chr1	8349816	8352741	u:32	0	-
chr1	8352742	8352956	u:33	0	-
chr1	8352957	8353714	u:34	0	-
chr1	8404283	8404394	u:35	0	-
chr1	8435107	8435200	u:36	0	-
chr1	8438060	8438213	u:37	0	-
chr1	8453474	8453546	u:38	0	-
chr1	8455517	8455634	u:39	0	-
chr1	8544805	8544844	u:40	0	-
chr1	8573285	8573415	u:41	0	-
chr1	8614859	8614962	u:42	0	-
chr1	8667887	8667929	u:43	0	-
chr1	8668017	8668061	u:44	0	-
chr1	8669153	8669211	u:45	0	-
chr1	8672053	8672110	u:46	0	-
chr1	8772843	8772978	u:47	0	-
chr1	8793997	8794051	u:48	0	-
chr1	8940645	8940971	u:49	0	-
chr1	8989266	8989330	u:50	0	-
chr1	9193259	9193341	u:51	0	-
chr1	9239399	9239491	u:52	0	-
chr1	9288213	9289811	u:53	0	-
chr1	9550914	9551859	u:54	0	-
chr1	9553903	9553952	u:55	0	-
chr1	9591104	9591362	u:56	0	-
chr1	9609630	9609720	u:57	0	-
chr1	9611035	9611163	u:58	0	-
chr1	9621141	9621173	u:59	0	-
chr1	9658916	9659964	u:60	0	-
chr1	9709567	9710486	u:61	0	-
chr1	9710487	9710619	u:62	0	-
chr1	9710620	9713250	u:63	0	-
chr1	9713251	9713370	u:64	0	-
chr1	9713371	9713517	u:65	0	-
chr1	9713518	9714450	u:66	0	-
chr1	9714451	9714562	u:67	0	-
chr1	9932040	9932103	u:68	0	-
chr1	9932104	9932236	u:69	0	-
chr1	9932403	9932472	u:70	0	-
chr1	9932549	9932624	u:71	0	-
chr1	9932690	9932798	u:72	0	-
chr1	9934100	9934199	u:73	0	-
chr1	9958705	9959012	u:74	0	-
chr1	9975672	9975790	u:75	0	-
chr1	9985144	9985358	u:76	0	-
chr1	9989481	9989620	u:77	0	-
chr1	9990051	9990218	u:78	0	-
chr1	9993315	9993534	u:79	0	-
chr1	9999152	9999211	u:80	0	-
chr1	10014681	10014910	u:81	0	-
chr1	10014911	10015059	u:82	0	-
chr1	10021001	10022415	u:83	0	-
chr1	10032922	10033201	u:84	0	-
chr1	10038973	10039091	u:85	0	-
chr1	10127588	10127651	u:86	0	-
chr1	10127652	10128346	u:87	0	-
chr1	10128347	10128912	u:88	0	-
chr1	10146480	10149517	u:89	0	-
chr1	10163156	10163238	u:90	0	-
chr1	10314808	10315204	u:91	0	-
chr1	12856631	12861948	u:92	0	-
chr1	12868676	12871533	u:93	0	-
chr1	12884507	12884549	u:94	0	-
chr1	13103509	13104340	u:95	0	-
chr1	13129200	13131349	u:96	0	-
chr1	13131350	13132841	u:97	0	-
chr1	13154582	13154899	u:98	0	-
chr1	13156006	13156959	u:99	0	-
chr1	13172365	13174136	u:100	0	-
chr1	13174687	13176652	u:101	0	-
chr1	13333669	13337135	u:102	0	-
chr1	13554775	13554861	u:103	0	-
chr1	13554862	13556298	u:104	0	-
chr1	13556299	13556403	u:105	0	-
chr1	13615980	13616101	u:106	0	-
chr1	13616102	13616832	u:107	0	-
chr1	13616833	13616941	u:108	0	-
chr1	13775766	13777010	u:109	0	-
chr1	14159035	14160996	u:110	0	-
chr1	14743429	14744319	u:111	0	-
chr1	14862729	14863586	u:112	0	-
chr1	15258711	15258997	u:113	0	-
chr1	15843943	15845430	u:114	0	-
chr1	15845431	15845825	u:115	0	-
chr1	16056060	16056355	u:116	0	-
chr1	16058880	16058936	u:117	0	-
chr1	16068648	16068781	u:118	0	-
chr1	16070910	16071074	u:119	0	-
chr1	16071748	16072591	u:120	0	-
chr1	16083054	16083406	u:121	0	-
chr1	16091376	16091440	u:122	0	-
chr1	16091807	16091808	u:123	0	-
chr1	16218755	16218884	u:124	0	-
chr1	16218885	16219213	u:125	0	-
chr1	16219214	16219853	u:126	0	-
chr1	16334279	16334371	u:127	0	-
chr1	16334372	16335733	u:128	0	-
chr1	16335734	16335778	u:129	0	-
chr1	16449796	16450396	u:130	0	-
chr1	16530871	16531852	u:131	0	-
chr1	16558756	16559486	u:132	0	-
chr1	16559487	16559712	u:133	0	-
chr1	16559713	16559864	u:134	0	-
chr1	16559865	16560160	u:135	0	-
chr1	16560161	16560213	u:136	0	-
chr1	16560214	16560631	u:137	0	-
chr1	16560632	16561136	u:138	0	-
chr1	16561137	16561349	u:139	0	-
chr1	16574239	16575278	u:140	0	-
chr1	16631807	16632845	u:141	0	-
chr1	16632846	16633140	u:142	0	-
chr1	16633141	16633329	u:143	0	-
chr1	16633330	16633368	u:144	0	-
chr1	16985008	16987544	u:145	0	-
chr1	16987545	16987559	u:146	0	-
chr1	17666108	17667185	u:147	0	-
chr1	17687076	17687234	u:148	0	-
chr1	17697750	17697807	u:149	0	-
chr1	17699766	17699976	u:150	0	-
chr1	17702530	17702675	u:151	0	-
chr1	17714602	17714670	u:152	0	-
chr1	17717179	17717727	u:153	0	-
chr1	18105272	18105709	u:154	0	-
chr1	18200134	18200311	u:155	0	-
chr1	18213601	18213645	u:156	0	-
chr1	18241059	18241280	u:157	0	-
chr1	20047860	20048378	u:158	0	-
chr1	20583034	20583962	u:159	0	-
chr1	20596411	20596522	u:160	0	-
chr1	20767230	20767847	u:161	0	-
chr1	20793043	20793536	u:162	0	-
chr1	20990036	20991435	u:163	0	-
chr1	20991436	20991642	u:164	0	-
chr1	21275327	21275688	u:165	0	-
chr1	21388484	21391766	u:166	0	-
chr1	21391767	21392243	u:167	0	-
chr1	21414130	21414131	u:168	0	-
chr1	22475030	22475031	u:169	0	-
chr1	22600115	22600805	u:170	0	-
chr1	23107313	23107468	u:171	0	-
chr1	23107469	23108608	u:172	0	-
chr1	23373263	23376381	u:173	0	-
chr1	23376382	23376587	u:174	0	-
chr1	23398588	23399850	u:175	0	-
chr1	23404352	23404611	u:176	0	-
chr1	23850016	23851684	u:177	0	-
chr1	23851685	23852196	u:178	0	-
chr1	23852466	23852682	u:179	0	-
chr1	23852683	23852827	u:180	0	-
chr1	23852828	23853084	u:181	0	-
chr1	23853085	23853402	u:182	0	-
chr1	23855102	23855410	u:183	0	-
chr1	23855634	23856307	u:184	0	-
chr1	23860261	23860389	u:185	0	-
chr1	23865861	23865952	u:186	0	-
chr1	23873055	23873132	u:187	0	-
chr1	23883213	23883288	u:188	0	-
chr1	23884547	23884633	u:189	0	-
chr1	23898698	23898832	u:190	0	-
chr1	23916501	23916575	u:191	0	-
chr1	24001943	24002777	u:192	0	-
chr1	24002778	24003089	u:193	0	-
chr1	24017597	24017931	u:194	0	-
chr1	24017932	24018445	u:195	0	-
chr1	24018446	24018514	u:196	0	-
chr1	24018515	24018722	u:197	0	-
chr1	24018723	24019336	u:198	0	-
chr1	24021617	24021731	u:199	0	-
chr1	24027513	24027624	u:200	0	-
chr1	24028692	24028844	u:201	0	-
chr1	24031051	24031149	u:202	0	-
chr1	24031620	24031712	u:203	0	-
chr1	24033446	24033662	u:204	0	-
chr1	24035038	24037367	u:205	0	-
chr1	24058603	24059968	u:206	0	-
chr1	24264522	24269223	u:207	0	-
chr1	24269224	24271528	u:208	0	-
chr1	24286609	24286636	u:209	0	-
chr1	24619539	24619584	u:210	0	-
chr1	24619585	24619915	u:211	0	-
chr1	24619916	24620809	u:212	0	-
chr1	24620810	24621651	u:213	0	-
chr1	25124321	25124399	u:214	0	-
chr1	25124400	25124517	u:215	0	-
chr1	25124518	25125012	u:216	0	-
chr1	25148299	25150555	u:217	0	-
chr1	26738646	26738796	u:218	0	-
chr1	28832967	28833103	u:219	0	-
chr1	30775399	30776049	u:220	0	-
chr1	30776291	30776806	u:221	0	-
chr1	30859187	30859902	u:222	0	-
chr1	30859903	30859947	u:223	0	-
chr1	30859948	30860390	u:224	0	-
chr1	30860391	30860643	u:225	0	-
chr1	30870416	30870729	u:226	0	-
chr1	30872160	30873126	u:227	0	-
chr1	30997148	31000050	u:228	0	-
chr1	31197923	31198595	u:229	0	-
chr1	31259787	31260197	u:230	0	-
chr1	32600391	32602235	u:231	0	-
chr1	33510654	33510930	u:232	0	-
chr1	33535787	33537176	u:233	0	-
chr1	33802329	33803451	u:234	0	-
chr1	33818390	33818595	u:235	0	-
chr1	33818596	33819007	u:236	0	-
chr1	33856533	33858804	u:237	0	-
chr1	33858805	33858964	u:238	0	-
chr1	33892744	33892966	u:239	0	-
chr1	33908897	33909686	u:240	0	-
chr1	33909687	33910212	u:241	0	-
chr1	33920016	33920542	u:242	0	-
chr1	33940285	33940493	u:243	0	-
chr1	33964410	33964466	u:244	0	-
chr1	34493515	34494342	u:245	0	-
chr1	34534220	34534441	u:246	0	-
chr1	34537000	34537101	u:247	0	-
chr1	34537442	34537604	u:248	0	-
chr1	34541632	34541758	u:249	0	-
chr1	34542349	34542456	u:250	0	-
chr1	34600820	34601590	u:251	0	-
chr1	34609177	34609339	u:252	0	-
chr1	34612813	34612983	u:253	0	-
chr1	34614697	34614972	u:254	0	-
chr1	34616587	34616779	u:255	0	-
chr1	34617574	34617788	u:256	0	-
chr1	34690380	34692384	u:257	0	-
chr1	34870063	34871563	u:258	0	-
chr1	34871564	34873354	u:259	0	-
chr1	34873355	34873935	u:260	0	-
chr1	34873936	34874249	u:261	0	-
chr1	34874841	34874858	u:262	0	-
chr1	36196872	36198375	u:263	0	-
chr1	36198376	36199235	u:264	0	-
chr1	36199236	36200296	u:265	0	-
chr1	36200297	36201070	u:266	0	-
chr1	36236099	36236290	u:267	0	-
chr1	36321447	36321502	u:268	0	-
chr1	36321503	36323204	u:269	0	-
chr1	36325802	36325986	u:270	0	-
chr1	36392575	36393513	u:271	0	-
chr1	36393514	36394475	u:272	0	-
chr1	36478907	36479232	u:273	0	-
chr1	36479233	36480030	u:274	0	-
chr1	36480031	36480154	u:275	0	-
chr1	36480155	36481205	u:276	0	-
chr1	36586763	36587033	u:277	0	-
chr1	36587034	36587378	u:278	0	-
chr1	36587379	36588317	u:279	0	-
chr1	36588318	36588390	u:280	0	-
chr1	36595016	36595874	u:281	0	-
chr1	36595875	36595983	u:282	0	-
chr1	36595984	36596379	u:283	0	-
chr1	36597282	36598907	u:284	0	-
chr1	36599606	36599710	u:285	0	-
chr1	36603754	36604064	u:286	0	-
chr1	36605487	36606383	u:287	0	-
chr1	36612777	36612922	u:288	0	-
chr1	36613647	36613774	u:289	0	-
chr1	36614860	36615226	u:290	0	-
chr1	36619541	36619832	u:291	0	-
chr1	36656819	36656921	u:292	0	-
chr1	36754959	36756046	u:293	0	-
chr1	36756047	36756920	u:294	0	-
chr1	36849034	36849112	u:295	0	-
chr1	36849113	36849765	u:296	0	-
chr1	37390384	37390679	u:297	0	-
chr1	37390908	37391017	u:298	0	-
chr1	37473930	37477090	u:299	0	-
chr1	37477091	37477163	u:300	0	-
chr1	37477164	37477430	u:301	0	-
chr1	37496185	37501503	u:302	0	-
chr1	37542696	37545450	u:303	0	-
chr1	37668514	37669101	u:304	0	-
chr1	37694706	37694874	u:305	0	-
chr1	37701405	37701485	u:306	0	-
chr1	37733186	37733624	u:307	0	-
chr1	37776414	37776656	u:308	0	-
chr1	37811621	37812341	u:309	0	-
chr1	37817669	37817789	u:310	0	-
chr1	37889251	37889508	u:311	0	-
chr1	37889509	37891922	u:312	0	-
chr1	37935735	37936112	u:313	0	-
chr1	37962768	37964401	u:314	0	-
chr1	38003583	38003729	u:315	0	-
chr1	38040712	38042033	u:316	0	-
chr1	38042034	38043756	u:317	0	-
chr1	38043757	38043946	u:318	0	-
chr1	38043947	38044237	u:319	0	-
chr1	38044238	38044287	u:320	0	-
chr1	38044288	38044379	u:321	0	-
chr1	38044380	38044506	u:322	0	-
chr1	38109441	38109630	u:323	0	-
chr1	38109631	38109931	u:324	0	-
chr1	38234171	38236087	u:325	0	-
chr1	38236088	38236293	u:326	0	-
chr1	38264751	38264752	u:327	0	-
chr1	38850516	38851353	u:328	0	-
chr1	38851354	38854873	u:329	0	-
chr1	38920718	38921020	u:330	0	-
chr1	38921021	38924821	u:331	0	-
chr1	38926988	38928305	u:332	0	-
chr1	39428340	39428707	u:333	0	-
chr1	39428708	39429193	u:334	0	-
chr1	39430157	39430517	u:335	0	-
chr1	39604433	39604506	u:336	0	-
chr1	39605586	39605685	u:337	0	-
chr1	39605770	39605961	u:338	0	-
chr1	39607298	39608140	u:339	0	-
chr1	39608141	39608390	u:340	0	-
chr1	39608391	39609316	u:341	0	-
chr1	39675251	39679599	u:342	0	-
chr1	39679600	39679940	u:343	0	-
chr1	39722146	39722307	u:344	0	-
chr1	39860986	39861027	u:345	0	-
chr1	39899273	39899401	u:346	0	-
chr1	39900862	39900948	u:347	0	-
chr1	39902072	39902184	u:348	0	-
chr1	39902509	39902691	u:349	0	-
chr1	39904153	39904175	u:350	0	-
chr1	40133073	40133483	u:351	0	-
chr1	40141811	40141859	u:352	0	-
chr1	40141988	40142132	u:353	0	-
chr1	40142457	40142696	u:354	0	-
chr1	40828086	40828882	u:355	0	-
chr1	40828883	40830597	u:356	0	-
chr1	42705043	42705301	u:357	0	-
chr1	42720400	42720447	u:358	0	-
chr1	42723685	42723848	u:359	0	-
chr1	42724430	42724517	u:360	0	-
chr1	42749785	42749876	u:361	0	-
chr1	42749877	42751335	u:362	0	-
chr1	42751591	42751670	u:363	0	-
chr1	42763917	42764897	u:364	0	-
chr1	43104045	43104108	u:365	0	-
chr1	43104109	43105557	u:366	0	-
chr1	43105558	43106503	u:367	0	-
chr1	43111553	43113330	u:368	0	-
chr1	43131086	43132039	u:369	0	-
chr1	43179917	43180358	u:370	0	-
chr1	44066253	44066483	u:371	0	-
chr1	44067355	44070346	u:372	0	-
chr1	44143460	44143686	u:373	0	-
chr1	44143687	44143734	u:374	0	-
chr1	44160741	44163390	u:375	0	-
chr1	44163391	44163729	u:376	0	-
chr1	44163730	44163931	u:377	0	-
chr1	44168928	44169843	u:378	0	-
chr1	44260915	44262286	u:379	0	-
chr1	44262287	44263194	u:380	0	-
chr1	45431176	45431469	u:381	0	-
chr1	45431470	45431729	u:382	0	-
chr1	45431730	45432631	u:383	0	-
chr1	45432632	45432928	u:384	0	-
chr1	45471044	45471553	u:385	0	-
chr1	45786492	45786515	u:386	0	-
chr1	45964915	45965005	u:387	0	-
chr1	45965006	45966146	u:388	0	-
chr1	45966147	45966250	u:389	0	-
chr1	45972086	45975127	u:390	0	-
chr1	46068392	46068601	u:391	0	-
chr1	46077260	46078792	u:392	0	-
chr1	46081748	46081938	u:393	0	-
chr1	46083343	46083463	u:394	0	-
chr1	46084760	46085569	u:395	0	-
chr1	46085642	46087282	u:396	0	-
chr1	46863553	46863670	u:397	0	-
chr1	46863671	46864388	u:398	0	-
chr1	46864389	46866399	u:399	0	-
chr1	46866400	46866797	u:400	0	-
chr1	46874447	46874866	u:401	0	-
chr1	51514776	51515168	u:402	0	-
chr1	51515620	51515775	u:403	0	-
chr1	51522851	51524280	u:404	0	-
chr1	51524281	51525349	u:405	0	-
chr1	51525350	51525930	u:406	0	-
chr1	51526332	51526449	u:407	0	-
chr1	51526450	51526663	u:408	0	-
chr1	51526664	51526754	u:409	0	-
chr1	51526755	51526799	u:410	0	-
chr1	51526800	51527139	u:411	0	-
chr1	51527140	51528255	u:412	0	-
chr1	51529172	51529224	u:413	0	-
chr1	51529849	51529925	u:414	0	-
chr1	51531377	51531449	u:415	0	-
chr1	51534321	51534460	u:416	0	-
chr1	51534565	51535243	u:417	0	-
chr1	51563930	51566888	u:418	0	-
chr1	51639203	51639622	u:419	0	-
chr1	51647227	51647320	u:420	0	-
chr1	51653144	51653562	u:421	0	-
chr1	51806602	51806833	u:422	0	-
chr1	51806834	51806934	u:423	0	-
chr1	51806935	51807833	u:424	0	-
chr1	51807834	51808016	u:425	0	-
chr1	51867525	51869781	u:426	0	-
chr1	51919489	51920158	u:427	0	-
chr1	52220294	52221883	u:428	0	-
chr1	52221884	52222738	u:429	0	-
chr1	52222739	52223001	u:430	0	-
chr1	52242124	52242433	u:431	0	-
chr1	52242434	52244667	u:432	0	-
chr1	52512693	52514137	u:433	0	-
chr1	52514138	52514251	u:434	0	-
chr1	52514252	52515329	u:435	0	-
chr1	52515330	52515690	u:436	0	-
chr1	52515691	52516061	u:437	0	-
chr1	52713144	52713397	u:438	0	-
chr1	52713398	52715185	u:439	0	-
chr1	52716830	52717503	u:440	0	-
chr1	52732467	52733271	u:441	0	-
chr1	52846264	52846511	u:442	0	-
chr1	52981747	52981970	u:443	0	-
chr1	52981971	52982028	u:444	0	-
chr1	52982029	52982161	u:445	0	-
chr1	53215421	53215590	u:446	0	-
chr1	53246032	53246177	u:447	0	-
chr1	53253667	53253668	u:448	0	-
chr1	53382351	53383301	u:449	0	-
chr1	53387055	53387252	u:450	0	-
chr1	53401482	53401773	u:451	0	-
chr1	53403423	53403605	u:452	0	-
chr1	53403859	53405402	u:453	0	-
chr1	53406830	53406848	u:454	0	-
chr1	53406849	53406906	u:455	0	-
chr1	53407723	53407777	u:456	0	-
chr1	53409373	53409543	u:457	0	-
chr1	53754874	53755372	u:458	0	-
chr1	53755475	53755538	u:459	0	-
chr1	53758861	53758924	u:460	0	-
chr1	53763521	53763628	u:461	0	-
chr1	53810516	53812351	u:462	0	-
chr1	53812352	53812949	u:463	0	-
chr1	53812950	53814331	u:464	0	-
chr1	53863718	53868018	u:465	0	-
chr1	53868019	53870065	u:466	0	-
chr1	53987659	53987924	u:467	0	-
chr1	53998340	53999213	u:468	0	-
chr1	54452848	54454420	u:469	0	-
chr1	54454421	54454723	u:470	0	-
chr1	54581128	54581129	u:471	0	-
chr1	54702184	54705120	u:472	0	-
chr1	54792146	54793065	u:473	0	-
chr1	54817731	54819098	u:474	0	-
chr1	55042000	55042135	u:475	0	-
chr1	55042136	55042534	u:476	0	-
chr1	55042535	55043868	u:477	0	-
chr1	55043869	55044145	u:478	0	-
chr1	55044146	55044177	u:479	0	-
chr1	55134677	55134895	u:480	0	-
chr1	55134896	55135131	u:481	0	-
chr1	55227003	55228590	u:482	0	-
chr1	55228591	55228653	u:483	0	-
chr1	55263180	55263459	u:484	0	-
chr1	55282964	55283626	u:485	0	-
chr1	55403101	55403209	u:486	0	-
chr1	56692893	56693041	u:487	0	-
chr1	56850825	56851087	u:488	0	-
chr1	56851088	56853626	u:489	0	-
chr1	57257489	57259691	u:490	0	-
chr1	57261372	57261452	u:491	0	-
chr1	57263557	57263743	u:492	0	-
chr1	57265643	57265883	u:493	0	-
chr1	57269249	57269483	u:494	0	-
chr1	57270556	57270740	u:495	0	-
chr1	57271663	57271837	u:496	0	-
chr1	57410225	57410258	u:497	0	-
chr1	57410342	57410411	u:498	0	-
chr1	57416066	57417507	u:499	0	-
chr1	57419409	57419607	u:500	0	-
chr1	57432091	57432363	u:501	0	-
chr1	57434248	57434388	u:502	0	-
chr1	57445087	57445339	u:503	0	-
chr1	57450165	57450294	u:504	0	-
chr1	58011945	58012096	u:505	0	-
chr1	58012097	58012899	u:506	0	-
chr1	58012900	58013171	u:507	0	-
chr1	58016898	58018733	u:508	0	-
chr1	58020410	58024230	u:509	0	-
chr1	58467033	58468831	u:510	0	-
chr1	58468832	58468899	u:511	0	-
chr1	58468900	58469040	u:512	0	-
chr1	58486481	58487021	u:513	0	-
chr1	58487022	58487836	u:514	0	-
chr1	58487837	58488047	u:515	0	-
chr1	58490628	58491170	u:516	0	-
chr1	58519615	58520036	u:517	0	-
chr1	58520037	58520310	u:518	0	-
chr1	58520311	58520819	u:519	0	-
chr1	58520820	58521047	u:520	0	-
chr1	58576794	58579649	u:521	0	-
chr1	58579650	58579764	u:522	0	-
chr1	58579765	58586501	u:523	0	-
chr1	58714964	58715208	u:524	0	-
chr1	58715209	58715267	u:525	0	-
chr1	58956030	58957293	u:526	0	-
chr1	58957294	58958034	u:527	0	-
chr1	58958035	58959320	u:528	0	-
chr1	58959321	58960347	u:529	0	-
chr1	59053967	59054106	u:530	0	-
chr1	59107350	59107577	u:531	0	-
chr1	59107578	59107766	u:532	0	-
chr1	59157437	59157980	u:533	0	-
chr1	59177779	59178288	u:534	0	-
chr1	59180286	59180421	u:535	0	-
chr1	59181474	59182044	u:536	0	-
chr1	59182366	59182460	u:537	0	-
chr1	59185775	59185856	u:538	0	-
chr1	59186768	59186939	u:539	0	-
chr1	59188765	59188807	u:540	0	-
chr1	59190658	59190673	u:541	0	-
chr1	59193682	59193703	u:542	0	-
chr1	59196002	59196644	u:543	0	-
chr1	59197787	59197805	u:544	0	-
chr1	59200599	59200664	u:545	0	-
chr1	59201497	59201694	u:546	0	-
chr1	59202009	59202646	u:547	0	-
chr1	59204970	59205843	u:548	0	-
chr1	59219600	59219774	u:549	0	-
chr1	59219775	59221020	u:550	0	-
chr1	59248467	59248507	u:551	0	-
chr1	59589835	59590086	u:552	0	-
chr1	59599282	59599393	u:553	0	-
chr1	59605531	59605632	u:554	0	-
chr1	59696278	59696383	u:555	0	-
chr1	59696384	59697043	u:556	0	-
chr1	60045912	60047358	u:557	0	-
chr1	60047359	60047967	u:558	0	-
chr1	60077635	60078130	u:559	0	-
chr1	60133712	60134538	u:560	0	-
chr1	60134539	60134912	u:561	0	-
chr1	60134913	60134986	u:562	0	-
chr1	60134987	60135007	u:563	0	-
chr1	60540029	60540079	u:564	0	-
chr1	60540347	60542727	u:565	0	-
chr1	60833509	60834068	u:566	0	-
chr1	60838393	60838537	u:567	0	-
chr1	61813989	61815104	u:568	0	-
chr1	61818522	61818657	u:569	0	-
chr1	61833318	61833528	u:570	0	-
chr1	61894994	61895109	u:571	0	-
chr1	61897707	61898114	u:572	0	-
chr1	63004993	63005206	u:573	0	-
chr1	63009163	63009308	u:574	0	-
chr1	63027008	63027085	u:575	0	-
chr1	63027771	63027954	u:576	0	-
chr1	63094375	63105471	u:577	0	-
chr1	63105472	63105719	u:578	0	-
chr1	63107613	63107771	u:579	0	-
chr1	63108609	63108827	u:580	0	-
chr1	63112277	63112411	u:581	0	-
chr1	63114757	63114867	u:582	0	-
chr1	63120895	63121120	u:583	0	-
chr1	63125526	63125635	u:584	0	-
chr1	63132241	63132972	u:585	0	-
chr1	63138364	63138503	u:586	0	-
chr1	63190166	63190404	u:587	0	-
chr1	63203257	63203701	u:588	0	-
chr1	63205476	63206311	u:589	0	-
chr1	63228675	63229144	u:590	0	-
chr1	63229145	63229264	u:591	0	-
chr1	63229265	63229586	u:592	0	-
chr1	63669425	63669588	u:593	0	-
chr1	63745401	63745582	u:594	0	-
chr1	64079442	64081359	u:595	0	-
chr1	64081360	64082160	u:596	0	-
chr1	64082247	64082286	u:597	0	-
chr1	64088500	64088883	u:598	0	-
chr1	64653051	64653657	u:599	0	-
chr1	64653658	64653929	u:600	0	-
chr1	64653930	64654313	u:601	0	-
chr1	64726440	64726959	u:602	0	-
chr1	64737037	64737233	u:603	0	-
chr1	64777132	64777267	u:604	0	-
chr1	64777268	64780987	u:605	0	-
chr1	64780988	64781416	u:606	0	-
chr1	64832557	64833161	u:607	0	-
chr1	64835695	64841788	u:608	0	-
chr1	64866509	64866667	u:609	0	-
chr1	64906872	64907824	u:610	0	-
chr1	64929702	64929896	u:611	0	-
chr1	64939325	64939471	u:612	0	-
chr1	64968123	64969056	u:613	0	-
chr1	64984270	64985113	u:614	0	-
chr1	65003268	65003398	u:615	0	-
chr1	65059654	65059840	u:616	0	-
chr1	65074288	65075147	u:617	0	-
chr1	65077141	65077262	u:618	0	-
chr1	65079159	65079322	u:619	0	-
chr1	65095131	65095197	u:620	0	-
chr1	65108412	65108483	u:621	0	-
chr1	65117861	65118105	u:622	0	-
chr1	65118106	65118172	u:623	0	-
chr1	65126801	65126865	u:624	0	-
chr1	65146963	65147026	u:625	0	-
chr1	65151857	65152302	u:626	0	-
chr1	65153887	65155270	u:627	0	-
chr1	65205190	65205246	u:628	0	-
chr1	65205247	65205430	u:629	0	-
chr1	65205431	65205539	u:630	0	-
chr1	65205540	65206038	u:631	0	-
chr1	66765817	66765932	u:632	0	-
chr1	66765933	66767349	u:633	0	-
chr1	66782116	66782136	u:634	0	-
chr1	66823572	66824519	u:635	0	-
chr1	66847316	66847477	u:636	0	-
chr1	66847478	66847618	u:637	0	-
chr1	66877427	66877743	u:638	0	-
chr1	66877744	66877849	u:639	0	-
chr1	66877850	66878007	u:640	0	-
chr1	66970869	66971131	u:641	0	-
chr1	66971596	66971610	u:642	0	-
chr1	66972627	66972719	u:643	0	-
chr1	67047091	67047826	u:644	0	-
chr1	67047827	67049950	u:645	0	-
chr1	67049951	67050131	u:646	0	-
chr1	67050912	67050985	u:647	0	-
chr1	67051363	67051501	u:648	0	-
chr1	67053490	67053624	u:649	0	-
chr1	67055801	67055948	u:650	0	-
chr1	67056484	67056620	u:651	0	-
chr1	67067431	67067639	u:652	0	-
chr1	68086540	68086614	u:653	0	-
chr1	69577784	69578681	u:654	0	-
chr1	69578682	69585341	u:655	0	-
chr1	71074109	71076940	u:656	0	-
chr1	71076941	71077093	u:657	0	-
chr1	71289664	71289870	u:658	0	-
chr1	71336587	71337862	u:659	0	-
chr1	71357548	71359077	u:660	0	-
chr1	71408317	71409170	u:661	0	-
chr1	71632097	71632785	u:662	0	-
chr1	71650682	71651535	u:663	0	-
chr1	71689399	71689417	u:664	0	-
chr1	71691051	71692073	u:665	0	-
chr1	72205807	72206018	u:666	0	-
chr1	72206019	72207458	u:667	0	-
chr1	72305747	72305921	u:668	0	-
chr1	72313570	72313675	u:669	0	-
chr1	72473683	72475215	u:670	0	-
chr1	72689554	72689580	u:671	0	-
chr1	72904508	72904629	u:672	0	-
chr1	72904630	72906544	u:673	0	-
chr1	72906545	72908313	u:674	0	-
chr1	72908314	72908950	u:675	0	-
chr1	73061649	73061870	u:676	0	-
chr1	73437959	73438974	u:677	0	-
chr1	73441908	73442136	u:678	0	-
chr1	73443580	73443788	u:679	0	-
chr1	73446777	73446850	u:680	0	-
chr1	73447408	73447572	u:681	0	-
chr1	73451569	73451627	u:682	0	-
chr1	73453914	73454143	u:683	0	-
chr1	73662682	73664661	u:684	0	-
chr1	73664662	73665240	u:685	0	-
chr1	73666769	73666998	u:686	0	-
chr1	73719569	73719640	u:687	0	-
chr1	73904638	73904671	u:688	0	-
chr1	73905137	73905434	u:689	0	-
chr1	73906190	73906441	u:690	0	-
chr1	73907542	73907626	u:691	0	-
chr1	73909232	73909690	u:692	0	-
chr1	73910948	73911040	u:693	0	-
chr1	73956759	73958460	u:694	0	-
chr1	73958461	73959474	u:695	0	-
chr1	73959475	73960484	u:696	0	-
chr1	73960485	73961103	u:697	0	-
chr1	73963440	73963441	u:698	0	-
chr1	74036296	74036769	u:699	0	-
chr1	74238359	74238379	u:700	0	-
chr1	74326414	74326807	u:701	0	-
chr1	74334821	74335018	u:702	0	-
chr1	74335019	74335521	u:703	0	-
chr1	74335522	74335945	u:704	0	-
chr1	74482084	74484304	u:705	0	-
chr1	74484305	74485964	u:706	0	-
chr1	74611702	74612999	u:707	0	-
chr1	74613000	74613075	u:708	0	-
chr1	74613076	74613251	u:709	0	-
chr1	74613252	74613451	u:710	0	-
chr1	74628799	74631823	u:711	0	-
chr1	74640326	74640397	u:712	0	-
chr1	74785496	74785733	u:713	0	-
chr1	74785734	74786634	u:714	0	-
chr1	74787161	74787278	u:715	0	-
chr1	74928083	74928649	u:716	0	-
chr1	74936508	74936562	u:717	0	-
chr1	74947232	74947295	u:718	0	-
chr1	74948647	74948708	u:719	0	-
chr1	74969966	74971859	u:720	0	-
chr1	74991883	74992662	u:721	0	-
chr1	74994298	74994665	u:722	0	-
chr1	75013713	75013919	u:723	0	-
chr1	75013920	75014267	u:724	0	-
chr1	75122115	75122302	u:725	0	-
chr1	75131122	75131788	u:726	0	-
chr1	75131789	75132338	u:727	0	-
chr1	75132339	75132972	u:728	0	-
chr1	75168197	75168289	u:729	0	-
chr1	75168290	75168421	u:730	0	-
chr1	75168422	75168453	u:731	0	-
chr1	75174484	75175477	u:732	0	-
chr1	75177439	75179114	u:733	0	-
chr1	75179165	75179311	u:734	0	-
chr1	75179467	75179690	u:735	0	-
chr1	75181029	75181147	u:736	0	-
chr1	75181262	75181441	u:737	0	-
chr1	75181626	75181875	u:738	0	-
chr1	75182239	75182419	u:739	0	-
chr1	75182583	75182678	u:740	0	-
chr1	75182763	75183512	u:741	0	-
chr1	75184131	75184400	u:742	0	-
chr1	75184518	75184680	u:743	0	-
chr1	75186136	75186201	u:744	0	-
chr1	75194110	75194809	u:745	0	-
chr1	75194810	75194901	u:746	0	-
chr1	75194902	75194999	u:747	0	-
chr1	75195000	75195607	u:748	0	-
chr1	75195608	75195908	u:749	0	-
chr1	75195909	75196068	u:750	0	-
chr1	75196404	75196440	u:751	0	-
chr1	75210302	75211458	u:752	0	-
chr1	75211459	75211548	u:753	0	-
chr1	75211549	75211822	u:754	0	-
chr1	75211823	75212129	u:755	0	-
chr1	75212130	75212196	u:756	0	-
chr1	75216670	75217148	u:757	0	-
chr1	75219868	75220005	u:758	0	-
chr1	75220197	75220229	u:759	0	-
chr1	75243616	75244123	u:760	0	-
chr1	75252109	75252197	u:761	0	-
chr1	75268777	75268936	u:762	0	-
chr1	75270531	75270621	u:763	0	-
chr1	75270971	75271104	u:764	0	-
chr1	75272187	75272292	u:765	0	-
chr1	75274776	75274955	u:766	0	-
chr1	75304515	75305139	u:767	0	-
chr1	75305140	75305831	u:768	0	-
chr1	75362717	75364786	u:769	0	-
chr1	75364787	75365006	u:770	0	-
chr1	75366314	75366523	u:771	0	-
chr1	75369955	75370071	u:772	0	-
chr1	75371461	75371587	u:773	0	-
chr1	75471144	75471544	u:774	0	-
chr1	75482400	75482526	u:775	0	-
chr1	75487109	75487751	u:776	0	-
chr1	75492909	75493520	u:777	0	-
chr1	75498247	75498525	u:778	0	-
chr1	77363760	77366246	u:779	0	-
chr1	77369484	77370307	u:780	0	-
chr1	77393372	77395064	u:781	0	-
chr1	78097842	78099882	u:782	0	-
chr1	78180033	78182274	u:783	0	-
chr1	78414529	78414797	u:784	0	-
chr1	78421375	78421659	u:785	0	-
chr1	78421660	78421768	u:786	0	-
chr1	78493607	78494380	u:787	0	-
chr1	79431244	79431298	u:788	0	-
chr1	79431299	79431406	u:789	0	-
chr1	79431407	79431725	u:790	0	-
chr1	79603445	79605741	u:791	0	-
chr1	79698837	79699620	u:792	0	-
chr1	79699621	79701324	u:793	0	-
chr1	79701325	79701908	u:794	0	-
chr1	79701909	79702085	u:795	0	-
chr1	79711449	79711450	u:796	0	-
chr1	79722978	79723061	u:797	0	-
chr1	79789846	79790895	u:798	0	-
chr1	79790896	79791579	u:799	0	-
chr1	79811683	79813261	u:800	0	-
chr1	80195274	80196484	u:801	0	-
chr1	80261500	80262143	u:802	0	-
chr1	80262144	80263389	u:803	0	-
chr1	80263390	80263730	u:804	0	-
chr1	80497648	80497745	u:805	0	-
chr1	80497746	80498215	u:806	0	-
chr1	80498216	80500161	u:807	0	-
chr1	80501700	80501722	u:808	0	-
chr1	80642281	80644709	u:809	0	-
chr1	82229677	82233451	u:810	0	-
chr1	82233452	82234179	u:811	0	-
chr1	82281971	82283372	u:812	0	-
chr1	82445002	82445164	u:813	0	-
chr1	82445165	82445303	u:814	0	-
chr1	82445304	82447297	u:815	0	-
chr1	82447298	82448494	u:816	0	-
chr1	82448495	82449335	u:817	0	-
chr1	82449336	82449423	u:818	0	-
chr1	82449424	82449705	u:819	0	-
chr1	82688503	82688993	u:820	0	-
chr1	82692208	82692334	u:821	0	-
chr1	82694864	82694917	u:822	0	-
chr1	82721361	82721692	u:823	0	-
chr1	82753224	82754006	u:824	0	-
chr1	83009098	83010393	u:825	0	-
chr1	83252017	83252355	u:826	0	-
chr1	83252356	83252993	u:827	0	-
chr1	83252994	83253701	u:828	0	-
chr1	83261702	83262539	u:829	0	-
chr1	83840177	83840349	u:830	0	-
chr1	83847128	83847418	u:831	0	-
chr1	83850989	83851035	u:832	0	-
chr1	83877367	83877431	u:833	0	-
chr1	83877955	83878093	u:834	0	-
chr1	83878733	83878799	u:835	0	-
chr1	83907289	83908146	u:836	0	-
chr1	84032518	84032867	u:837	0	-
chr1	84032868	84032955	u:838	0	-
chr1	84032956	84033794	u:839	0	-
chr1	84033795	84033961	u:840	0	-
chr1	84033962	84034605	u:841	0	-
chr1	84111907	84112605	u:842	0	-
chr1	84153704	84155953	u:843	0	-
chr1	84187914	84187998	u:844	0	-
chr1	84336308	84336442	u:845	0	-
chr1	84337630	84337685	u:846	0	-
chr1	84366414	84367338	u:847	0	-
chr1	84530519	84531384	u:848	0	-
chr1	84717739	84719332	u:849	0	-
chr1	84719333	84720038	u:850	0	-
chr1	84720039	84720626	u:851	0	-
chr1	84720627	84720778	u:852	0	-
chr1	84720779	84720854	u:853	0	-
chr1	84720855	84720982	u:854	0	-
chr1	84720983	84721192	u:855	0	-
chr1	84778936	84780873	u:856	0	-
chr1	84903280	84903852	u:857	0	-
chr1	84987070	84987266	u:858	0	-
chr1	84988964	84989107	u:859	0	-
chr1	84989549	84989651	u:860	0	-
chr1	85022921	85024528	u:861	0	-
chr1	85079650	85079688	u:862	0	-
chr1	85081653	85081668	u:863	0	-
chr1	85084714	85084978	u:864	0	-
chr1	85084979	85085352	u:865	0	-
chr1	85108993	85109019	u:866	0	-
chr1	85242214	85242284	u:867	0	-
chr1	85242919	85243511	u:868	0	-
chr1	87473475	87473866	u:869	0	-
chr1	87613658	87614263	u:870	0	-
chr1	87614264	87614943	u:871	0	-
chr1	87615599	87615704	u:872	0	-
chr1	87619672	87619756	u:873	0	-
chr1	87621695	87621864	u:874	0	-
chr1	87623033	87623077	u:875	0	-
chr1	87633046	87633181	u:876	0	-
chr1	87836112	87837448	u:877	0	-
chr1	87995612	87995917	u:878	0	-
chr1	88241156	88241293	u:879	0	-
chr1	88241294	88241340	u:880	0	-
chr1	88241341	88241473	u:881	0	-
chr1	88241474	88241705	u:882	0	-
chr1	88241706	88242681	u:883	0	-
chr1	88242682	88243457	u:884	0	-
chr1	88243458	88244173	u:885	0	-
chr1	88244174	88246201	u:886	0	-
chr1	88246202	88246348	u:887	0	-
chr1	88246349	88246517	u:888	0	-
chr1	88246518	88246816	u:889	0	-
chr1	88246817	88246892	u:890	0	-
chr1	88246893	88247007	u:891	0	-
chr1	88247008	88247069	u:892	0	-
chr1	88247070	88247194	u:893	0	-
chr1	88247745	88247860	u:894	0	-
chr1	88252835	88252902	u:895	0	-
chr1	88439590	88440158	u:896	0	-
chr1	88442276	88442382	u:897	0	-
chr1	88443231	88443357	u:898	0	-
chr1	88444010	88444192	u:899	0	-
chr1	88478874	88479076	u:900	0	-
chr1	88562866	88563373	u:901	0	-
chr1	88566218	88566238	u:902	0	-
chr1	88983266	88983622	u:903	0	-
chr1	88994577	88995177	u:904	0	-
chr1	89044230	89044561	u:905	0	-
chr1	89281205	89281306	u:906	0	-
chr1	89281307	89282858	u:907	0	-
chr1	89282859	89282919	u:908	0	-
chr1	89282920	89282990	u:909	0	-
chr1	89373404	89374128	u:910	0	-
chr1	89841696	89842021	u:911	0	-
chr1	89842022	89843170	u:912	0	-
chr1	89882330	89882438	u:913	0	-
chr1	89902470	89903746	u:914	0	-
chr1	90101307	90101505	u:915	0	-
chr1	90101506	90101524	u:916	0	-
chr1	90155431	90159685	u:917	0	-
chr1	90159686	90160294	u:918	0	-
chr1	90160295	90161755	u:919	0	-
chr1	90171696	90172760	u:920	0	-
chr1	90396446	90397697	u:921	0	-
chr1	90569700	90571043	u:922	0	-
chr1	90571140	90571291	u:923	0	-
chr1	90594801	90596771	u:924	0	-
chr1	90596772	90598451	u:925	0	-
chr1	91573082	91576243	u:926	0	-
chr1	91576546	91576679	u:927	0	-
chr1	91577660	91577840	u:928	0	-
chr1	91580261	91580467	u:929	0	-
chr1	91824537	91825194	u:930	0	-
chr1	91849253	91849438	u:931	0	-
chr1	91850963	91851077	u:932	0	-
chr1	91889532	91889800	u:933	0	-
chr1	91910947	91911152	u:934	0	-
chr1	91938707	91939200	u:935	0	-
chr1	92688044	92688458	u:936	0	-
chr1	92854710	92855460	u:937	0	-
chr1	93270438	93270480	u:938	0	-
chr1	93270481	93271983	u:939	0	-
chr1	93272405	93272518	u:940	0	-
chr1	93277616	93277746	u:941	0	-
chr1	93299618	93300924	u:942	0	-
chr1	93300925	93300969	u:943	0	-
chr1	93301253	93301294	u:944	0	-
chr1	93301308	93301344	u:945	0	-
chr1	93301385	93301443	u:946	0	-
chr1	93301457	93301759	u:947	0	-
chr1	93302072	93302191	u:948	0	-
chr1	93302482	93302606	u:949	0	-
chr1	93308060	93308154	u:950	0	-
chr1	93308155	93309037	u:951	0	-
chr1	93312559	93314597	u:952	0	-
chr1	93315951	93316102	u:953	0	-
chr1	93316982	93317175	u:954	0	-
chr1	93317944	93318131	u:955	0	-
chr1	93320266	93321063	u:956	0	-
chr1	93324328	93324555	u:957	0	-
chr1	93325960	93326125	u:958	0	-
chr1	93327350	93327457	u:959	0	-
chr1	93327554	93327717	u:960	0	-
chr1	93329384	93329469	u:961	0	-
chr1	93329805	93330098	u:962	0	-
chr1	93331198	93331307	u:963	0	-
chr1	93331593	93331747	u:964	0	-
chr1	93332226	93332333	u:965	0	-
chr1	93334910	93334989	u:966	0	-
chr1	93336463	93336606	u:967	0	-
chr1	93337408	93337460	u:968	0	-
chr1	93341161	93341363	u:969	0	-
chr1	93342077	93342199	u:970	0	-
chr1	93345284	93345439	u:971	0	-
chr1	93346389	93346455	u:972	0	-
chr1	93347181	93347420	u:973	0	-
chr1	93355749	93355905	u:974	0	-
chr1	93695105	93699209	u:975	0	-
chr1	93829332	93829923	u:976	0	-
chr1	94335588	94336062	u:977	0	-
chr1	94336063	94336295	u:978	0	-
chr1	94336296	94336415	u:979	0	-
chr1	94407625	94407664	u:980	0	-
chr1	94533722	94533980	u:981	0	-
chr1	94536263	94536336	u:982	0	-
chr1	94538183	94538525	u:983	0	-
chr1	94540794	94540909	u:984	0	-
chr1	94766706	94766848	u:985	0	-
chr1	94803117	94804956	u:986	0	-
chr1	94804957	94805652	u:987	0	-
chr1	94805653	94806555	u:988	0	-
chr1	94806950	94807266	u:989	0	-
chr1	94830120	94831680	u:990	0	-
chr1	94847056	94847167	u:991	0	-
chr1	94888987	94889017	u:992	0	-
chr1	94889244	94889273	u:993	0	-
chr1	94889378	94889410	u:994	0	-
chr1	94889416	94889446	u:995	0	-
chr1	94890109	94890143	u:996	0	-
chr1	94890144	94890183	u:997	0	-
chr1	94890264	94890342	u:998	0	-
chr1	94890374	94890430	u:999	0	-
chr1	94890491	94890520	u:1000	0	-
chr1	94890730	94890758	u:1001	0	-
chr1	94890982	94891031	u:1002	0	-
chr1	94891048	94891091	u:1003	0	-
chr1	94891315	94891350	u:1004	0	-
chr1	94891380	94891410	u:1005	0	-
chr1	94891520	94891575	u:1006	0	-
chr1	94891680	94891726	u:1007	0	-
chr1	94892065	94892097	u:1008	0	-
chr1	94892493	94892526	u:1009	0	-
chr1	94892576	94892606	u:1010	0	-
chr1	94892744	94892773	u:1011	0	-
chr1	94892813	94892859	u:1012	0	-
chr1	94893021	94893080	u:1013	0	-
chr1	94893165	94893224	u:1014	0	-
chr1	94893329	94893384	u:1015	0	-
chr1	94893436	94893465	u:1016	0	-
chr1	94893503	94893531	u:1017	0	-
chr1	94912033	94914677	u:1018	0	-
chr1	94914678	94914856	u:1019	0	-
chr1	94914857	94915033	u:1020	0	-
chr1	95047932	95048159	u:1021	0	-
chr1	95048160	95048584	u:1022	0	-
chr1	95195788	95197799	u:1023	0	-
chr1	95197800	95197868	u:1024	0	-
chr1	95197869	95198036	u:1025	0	-
chr1	95200075	95201140	u:1026	0	-
chr1	95206014	95206411	u:1027	0	-
chr1	95206412	95206668	u:1028	0	-
chr1	95214405	95216437	u:1029	0	-
chr1	95302517	95304342	u:1030	0	-
chr1	95304343	95304739	u:1031	0	-
chr1	95304740	95304749	u:1032	0	-
chr1	95325146	95325873	u:1033	0	-
chr1	95517328	95518478	u:1034	0	-
chr1	95518479	95519063	u:1035	0	-
chr1	95601968	95602232	u:1036	0	-
chr1	95611474	95611578	u:1037	0	-
chr1	95613208	95613318	u:1038	0	-
chr1	95621226	95621893	u:1039	0	-
chr1	95645796	95647562	u:1040	0	-
chr1	95651033	95651415	u:1041	0	-
chr1	95688339	95689152	u:1042	0	-
chr1	95689153	95689409	u:1043	0	-
chr1	95694957	95695047	u:1044	0	-
chr1	95695352	95695940	u:1045	0	-
chr1	95696642	95697071	u:1046	0	-
chr1	95697072	95697374	u:1047	0	-
chr1	95934882	95935881	u:1048	0	-
chr1	97484259	97488258	u:1049	0	-
chr1	97523820	97524079	u:1050	0	-
chr1	97554891	97557436	u:1051	0	-
chr1	98715361	98715523	u:1052	0	-
chr1	98802753	98802917	u:1053	0	-
chr1	98806787	98806837	u:1054	0	-
chr1	98808390	98808442	u:1055	0	-
chr1	98956026	98956185	u:1056	0	-
chr1	98958947	98958970	u:1057	0	-
chr1	99540479	99542291	u:1058	0	-
chr1	99602623	99602717	u:1059	0	-
chr1	99602718	99604294	u:1060	0	-
chr1	99609517	99609551	u:1061	0	-
chr1	99717669	99718386	u:1062	0	-
chr1	99830048	99831223	u:1063	0	-
chr1	99927693	99927763	u:1064	0	-
chr1	99927764	99928685	u:1065	0	-
chr1	99929692	99929792	u:1066	0	-
chr1	99944278	99944336	u:1067	0	-
chr1	102120451	102121138	u:1068	0	-
chr1	107173494	107179948	u:1069	0	-
chr1	107179949	107180795	u:1070	0	-
chr1	107414999	107415377	u:1071	0	-
chr1	107415378	107417668	u:1072	0	-
chr1	107417669	107418580	u:1073	0	-
chr1	107543206	107544680	u:1074	0	-
chr1	108434756	108439840	u:1075	0	-
chr1	108608350	108608741	u:1076	0	-
chr1	108608742	108608857	u:1077	0	-
chr1	108616987	108617035	u:1078	0	-
chr1	108617036	108617492	u:1079	0	-
chr1	108617493	108618078	u:1080	0	-
chr1	108618079	108618386	u:1081	0	-
chr1	108618387	108620388	u:1082	0	-
chr1	108620389	108620476	u:1083	0	-
chr1	108620477	108621401	u:1084	0	-
chr1	108621402	108621478	u:1085	0	-
chr1	108665925	108666007	u:1086	0	-
chr1	108666008	108667364	u:1087	0	-
chr1	108667365	108667733	u:1088	0	-
chr1	108667734	108668182	u:1089	0	-
chr1	108668183	108668250	u:1090	0	-
chr1	108668251	108668450	u:1091	0	-
chr1	108668451	108668584	u:1092	0	-
chr1	108668585	108668631	u:1093	0	-
chr1	108668632	108668887	u:1094	0	-
chr1	108668888	108669023	u:1095	0	-
chr1	108942164	108942592	u:1096	0	-
chr1	109050538	109050945	u:1097	0	-
chr1	109167778	109168205	u:1098	0	-
chr1	112784904	112785771	u:1099	0	-
chr1	112785772	112786274	u:1100	0	-
chr1	113755279	113755756	u:1101	0	-
chr1	117565565	117566420	u:1102	0	-
chr1	117567744	117567791	u:1103	0	-
chr1	117576195	117576409	u:1104	0	-
chr1	117579974	117580154	u:1105	0	-
chr1	117581151	117581196	u:1106	0	-
chr1	120195095	120196486	u:1107	0	-
chr1	120196487	120196916	u:1108	0	-
chr1	120196917	120196984	u:1109	0	-
chr1	120196985	120197180	u:1110	0	-
chr1	120197181	120197380	u:1111	0	-
chr1	120355246	120355703	u:1112	0	-
chr1	120355704	120355842	u:1113	0	-
chr1	120730638	120730708	u:1114	0	-
chr1	120730709	120732361	u:1115	0	-
chr1	120744960	120745094	u:1116	0	-
chr1	120749834	120749957	u:1117	0	-
chr1	120751017	120751185	u:1118	0	-
chr1	120752012	120752214	u:1119	0	-
chr1	120786872	120786978	u:1120	0	-
chr1	120898616	120898783	u:1121	0	-
chr1	120949053	120950196	u:1122	0	-
chr1	121312040	121312270	u:1123	0	-
chr1	121312271	121313898	u:1124	0	-
chr1	121366882	121368282	u:1125	0	-
chr1	121416670	121416834	u:1126	0	-
chr1	121416968	121417055	u:1127	0	-
chr1	121417321	121417446	u:1128	0	-
chr1	121422709	121422936	u:1129	0	-
chr1	121426057	121428173	u:1130	0	-
chr1	121431554	121431599	u:1131	0	-
chr1	121432338	121432487	u:1132	0	-
chr1	121432639	121432742	u:1133	0	-
chr1	121441610	121445705	u:1134	0	-
chr1	121489907	121491400	u:1135	0	-
chr1	121491401	121491650	u:1136	0	-
chr1	121491651	121492455	u:1137	0	-
chr1	121554670	121556387	u:1138	0	-
chr1	121556388	121556407	u:1139	0	-
chr1	121804478	121806235	u:1140	0	-
chr1	121806236	121806588	u:1141	0	-
chr1	121963954	121964087	u:1142	0	-
chr1	121964088	121964286	u:1143	0	-
chr1	122009857	122010036	u:1144	0	-
chr1	122120962	122122980	u:1145	0	-
chr1	122122981	122123229	u:1146	0	-
chr1	122123230	122124223	u:1147	0	-
chr1	122371115	122371235	u:1148	0	-
chr1	123200930	123202254	u:1149	0	-
chr1	123202255	123202482	u:1150	0	-
chr1	123406350	123406964	u:1151	0	-
chr1	123450412	123450491	u:1152	0	-
chr1	123450492	123450572	u:1153	0	-
chr1	125228715	125228794	u:1154	0	-
chr1	125228795	125230309	u:1155	0	-
chr1	125230310	125230825	u:1156	0	-
chr1	126402334	126403388	u:1157	0	-
chr1	126406807	126406874	u:1158	0	-
chr1	126742295	126742616	u:1159	0	-
chr1	127289483	127289816	u:1160	0	-
chr1	127289817	127290571	u:1161	0	-
chr1	127768616	127768857	u:1162	0	-
chr1	127768858	127769912	u:1163	0	-
chr1	127810213	127811581	u:1164	0	-
chr1	128768780	128768953	u:1165	0	-
chr1	128772953	128773166	u:1166	0	-
chr1	129383128	129383274	u:1167	0	-
chr1	129386919	129387469	u:1168	0	-
chr1	129387470	129388237	u:1169	0	-
chr1	129392294	129392436	u:1170	0	-
chr1	129396760	129396872	u:1171	0	-
chr1	129415921	129416018	u:1172	0	-
chr1	129447902	129447994	u:1173	0	-
chr1	129449337	129449381	u:1174	0	-
chr1	129565227	129565347	u:1175	0	-
chr1	129574007	129574598	u:1176	0	-
chr1	129650193	129650268	u:1177	0	-
chr1	129650269	129650530	u:1178	0	-
chr1	129670504	129670631	u:1179	0	-
chr1	129850762	129851543	u:1180	0	-
chr1	129883687	129883931	u:1181	0	-
chr1	130181333	130181695	u:1182	0	-
chr1	130228162	130230057	u:1183	0	-
chr1	130258352	130260283	u:1184	0	-
chr1	130260284	130260810	u:1185	0	-
chr1	130308695	130308873	u:1186	0	-
chr1	130308874	130308924	u:1187	0	-
chr1	130484776	130485078	u:1188	0	-
chr1	130485079	130485407	u:1189	0	-
chr1	130485408	130485419	u:1190	0	-
chr1	132285105	132285184	u:1191	0	-
chr1	132335605	132336657	u:1192	0	-
chr1	132336658	132336778	u:1193	0	-
chr1	132336779	132336888	u:1194	0	-
chr1	132343249	132343884	u:1195	0	-
chr1	132473283	132473495	u:1196	0	-
chr1	132532459	132532587	u:1197	0	-
chr1	132532588	132532782	u:1198	0	-
chr1	132566779	132566978	u:1199	0	-
chr1	132567523	132567650	u:1200	0	-
chr1	132569160	132569293	u:1201	0	-
chr1	132570801	132570885	u:1202	0	-
chr1	132574259	132574297	u:1203	0	-
chr1	132574415	132574487	u:1204	0	-
chr1	132577915	132578148	u:1205	0	-
chr1	132585620	132585768	u:1206	0	-
chr1	132585769	132586370	u:1207	0	-
chr1	132586371	132587725	u:1208	0	-
chr1	132588832	132593247	u:1209	0	-
chr1	132593248	132593593	u:1210	0	-
chr1	132593594	132594191	u:1211	0	-
chr1	132594192	132594273	u:1212	0	-
chr1	132594274	132595066	u:1213	0	-
chr1	132595255	132595320	u:1214	0	-
chr1	132595764	132595827	u:1215	0	-
chr1	132596557	132596687	u:1216	0	-
chr1	132597346	132597451	u:1217	0	-
chr1	132598281	132598428	u:1218	0	-
chr1	132598807	132599015	u:1219	0	-
chr1	132601953	132602078	u:1220	0	-
chr1	132603002	132603059	u:1221	0	-
chr1	132603419	132603494	u:1222	0	-
chr1	132603628	132603695	u:1223	0	-
chr1	132604085	132604182	u:1224	0	-
chr1	132604652	132604778	u:1225	0	-
chr1	132611042	132611153	u:1226	0	-
chr1	132612297	132612398	u:1227	0	-
chr1	132778651	132779115	u:1228	0	-
chr1	132779910	132779985	u:1229	0	-
chr1	132780410	132780540	u:1230	0	-
chr1	132781364	132781427	u:1231	0	-
chr1	132782153	132782347	u:1232	0	-
chr1	132783828	132783988	u:1233	0	-
chr1	132803769	132803991	u:1234	0	-
chr1	132829233	132829724	u:1235	0	-
chr1	132950280	132951586	u:1236	0	-
chr1	132951587	132951668	u:1237	0	-
chr1	133025018	133025250	u:1238	0	-
chr1	133072987	133075254	u:1239	0	-
chr1	133077129	133077155	u:1240	0	-
chr1	133151172	133151881	u:1241	0	-
chr1	133181828	133183066	u:1242	0	-
chr1	133183067	133184850	u:1243	0	-
chr1	133184851	133185933	u:1244	0	-
chr1	133191565	133191795	u:1245	0	-
chr1	133191796	133192046	u:1246	0	-
chr1	133258603	133260542	u:1247	0	-
chr1	133919388	133920213	u:1248	0	-
chr1	133923198	133923384	u:1249	0	-
chr1	133923385	133925062	u:1250	0	-
chr1	133933360	133935550	u:1251	0	-
chr1	133937116	133937139	u:1252	0	-
chr1	133938434	133938505	u:1253	0	-
chr1	134008816	134010123	u:1254	0	-
chr1	134010124	134010233	u:1255	0	-
chr1	134010234	134010908	u:1256	0	-
chr1	134010909	134010986	u:1257	0	-
chr1	134010987	134011366	u:1258	0	-
chr1	134011367	134011512	u:1259	0	-
chr1	134252892	134254082	u:1260	0	-
chr1	134406002	134408370	u:1261	0	-
chr1	134408371	134412214	u:1262	0	-
chr1	134412597	134412766	u:1263	0	-
chr1	134413100	134413213	u:1264	0	-
chr1	134413477	134413664	u:1265	0	-
chr1	134414873	134414986	u:1266	0	-
chr1	134415238	134415473	u:1267	0	-
chr1	134415745	134415816	u:1268	0	-
chr1	134417715	134417865	u:1269	0	-
chr1	134418297	134418456	u:1270	0	-
chr1	134418909	134419030	u:1271	0	-
chr1	134419511	134419687	u:1272	0	-
chr1	134419934	134420062	u:1273	0	-
chr1	134461267	134465832	u:1274	0	-
chr1	134465833	134466996	u:1275	0	-
chr1	134496413	134496543	u:1276	0	-
chr1	134882670	134882796	u:1277	0	-
chr1	134882797	134884979	u:1278	0	-
chr1	134884980	134885274	u:1279	0	-
chr1	134886422	134887872	u:1280	0	-
chr1	134887873	134887929	u:1281	0	-
chr1	134887930	134888802	u:1282	0	-
chr1	134891079	134891160	u:1283	0	-
chr1	134893139	134893286	u:1284	0	-
chr1	134897859	134898020	u:1285	0	-
chr1	134900367	134900467	u:1286	0	-
chr1	134905713	134905769	u:1287	0	-
chr1	134907641	134907775	u:1288	0	-
chr1	134909213	134909291	u:1289	0	-
chr1	134915353	134915461	u:1290	0	-
chr1	134921824	134921925	u:1291	0	-
chr1	135146713	135146974	u:1292	0	-
chr1	135146975	135147993	u:1293	0	-
chr1	135152684	135153736	u:1294	0	-
chr1	135155021	135155131	u:1295	0	-
chr1	135166000	135166132	u:1296	0	-
chr1	135278877	135280501	u:1297	0	-
chr1	135280989	135281029	u:1298	0	-
chr1	135500232	135500438	u:1299	0	-
chr1	135500439	135500597	u:1300	0	-
chr1	135516425	135517474	u:1301	0	-
chr1	135517475	135517902	u:1302	0	-
chr1	135517903	135518119	u:1303	0	-
chr1	135550814	135551839	u:1304	0	-
chr1	135551840	135551975	u:1305	0	-
chr1	135552456	135553231	u:1306	0	-
chr1	135557813	135557957	u:1307	0	-
chr1	135575606	135575665	u:1308	0	-
chr1	135575666	135576354	u:1309	0	-
chr1	135599252	135600841	u:1310	0	-
chr1	135600842	135600893	u:1311	0	-
chr1	135600894	135603573	u:1312	0	-
chr1	135608208	135608210	u:1313	0	-
chr1	135610559	135610560	u:1314	0	-
chr1	135793771	135794376	u:1315	0	-
chr1	135797395	135797510	u:1316	0	-
chr1	135806882	135807490	u:1317	0	-
chr1	135807491	135808899	u:1318	0	-
chr1	135808900	135808970	u:1319	0	-
chr1	135808971	135809030	u:1320	0	-
chr1	135809031	135809182	u:1321	0	-
chr1	135971442	135971905	u:1322	0	-
chr1	135971906	135973443	u:1323	0	-
chr1	135973444	135973834	u:1324	0	-
chr1	135973835	135973945	u:1325	0	-
chr1	136095799	136096878	u:1326	0	-
chr1	136096879	136097932	u:1327	0	-
chr1	136097933	136098129	u:1328	0	-
chr1	136098130	136098180	u:1329	0	-
chr1	136098181	136098778	u:1330	0	-
chr1	136098779	136099527	u:1331	0	-
chr1	136193360	136194325	u:1332	0	-
chr1	136194326	136194916	u:1333	0	-
chr1	136194917	136195405	u:1334	0	-
chr1	136195602	136195654	u:1335	0	-
chr1	136242674	136243565	u:1336	0	-
chr1	136243566	136244026	u:1337	0	-
chr1	136244027	136244095	u:1338	0	-
chr1	136244096	136244338	u:1339	0	-
chr1	136244339	136244585	u:1340	0	-
chr1	136251815	136251968	u:1341	0	-
chr1	136251969	136252018	u:1342	0	-
chr1	136252019	136252123	u:1343	0	-
chr1	136437522	136437561	u:1344	0	-
chr1	136655644	136657072	u:1345	0	-
chr1	136662474	136662519	u:1346	0	-
chr1	136676300	136678744	u:1347	0	-
chr1	136699678	136700175	u:1348	0	-
chr1	136882925	136883512	u:1349	0	-
chr1	137005074	137005200	u:1350	0	-
chr1	137056827	137057456	u:1351	0	-
chr1	137150151	137150842	u:1352	0	-
chr1	137159276	137159547	u:1353	0	-
chr1	137197272	137198085	u:1354	0	-
chr1	137198086	137198194	u:1355	0	-
chr1	137198195	137198309	u:1356	0	-
chr1	137198310	137198494	u:1357	0	-
chr1	137267416	137267631	u:1358	0	-
chr1	137267632	137267738	u:1359	0	-
chr1	137267739	137268030	u:1360	0	-
chr1	137268031	137268526	u:1361	0	-
chr1	137270465	137270878	u:1362	0	-
chr1	137277163	137278891	u:1363	0	-
chr1	137278892	137280259	u:1364	0	-
chr1	137280260	137280371	u:1365	0	-
chr1	137280372	137280959	u:1366	0	-
chr1	137280960	137281051	u:1367	0	-
chr1	137281052	137281618	u:1368	0	-
chr1	137281619	137281706	u:1369	0	-
chr1	137281707	137281943	u:1370	0	-
chr1	137303336	137303337	u:1371	0	-
chr1	137331157	137334570	u:1372	0	-
chr1	137334571	137334917	u:1373	0	-
chr1	137334918	137337414	u:1374	0	-
chr1	137337415	137338355	u:1375	0	-
chr1	137351711	137351712	u:1376	0	-
chr1	137503024	137503734	u:1377	0	-
chr1	137647798	137648147	u:1378	0	-
chr1	137767972	137769526	u:1379	0	-
chr1	137769527	137770226	u:1380	0	-
chr1	137772174	137772206	u:1381	0	-
chr1	137850155	137850614	u:1382	0	-
chr1	137851147	137851473	u:1383	0	-
chr1	137852134	137852434	u:1384	0	-
chr1	137853274	137853364	u:1385	0	-
chr1	137855515	137855604	u:1386	0	-
chr1	137856277	137856580	u:1387	0	-
chr1	137858563	137858692	u:1388	0	-
chr1	137859645	137859819	u:1389	0	-
chr1	138020144	138022754	u:1390	0	-
chr1	138022755	138024295	u:1391	0	-
chr1	138024296	138024363	u:1392	0	-
chr1	138025969	138026082	u:1393	0	-
chr1	138027597	138027748	u:1394	0	-
chr1	138078051	138078228	u:1395	0	-
chr1	138078229	138078517	u:1396	0	-
chr1	138079294	138079297	u:1397	0	-
chr1	138110108	138110671	u:1398	0	-
chr1	138110672	138110902	u:1399	0	-
chr1	138120140	138121829	u:1400	0	-
chr1	138155490	138156373	u:1401	0	-
chr1	138164689	138164831	u:1402	0	-
chr1	138164832	138165741	u:1403	0	-
chr1	138165742	138167034	u:1404	0	-
chr1	138167035	138167418	u:1405	0	-
chr1	138173768	138173772	u:1406	0	-
chr1	138308493	138309404	u:1407	0	-
chr1	138309740	138310254	u:1408	0	-
chr1	138311425	138312096	u:1409	0	-
chr1	138739157	138740160	u:1410	0	-
chr1	138740161	138741690	u:1411	0	-
chr1	138741691	138742039	u:1412	0	-
chr1	139824966	139825077	u:1413	0	-
chr1	139827276	139827418	u:1414	0	-
chr1	139865689	139865817	u:1415	0	-
chr1	139959438	139959991	u:1416	0	-
chr1	139959992	139961082	u:1417	0	-
chr1	140016050	140016579	u:1418	0	-
chr1	140086788	140086920	u:1419	0	-
chr1	140088181	140088670	u:1420	0	-
chr1	140380414	140380697	u:1421	0	-
chr1	140380698	140381290	u:1422	0	-
chr1	140381291	140381356	u:1423	0	-
chr1	140381357	140382563	u:1424	0	-
chr1	140382564	140383062	u:1425	0	-
chr1	140383063	140383670	u:1426	0	-
chr1	140410325	140412037	u:1427	0	-
chr1	140536672	140537157	u:1428	0	-
chr1	140550231	140550297	u:1429	0	-
chr1	140553388	140554548	u:1430	0	-
chr1	140568009	140568322	u:1431	0	-
chr1	140574392	140574507	u:1432	0	-
chr1	140578549	140578652	u:1433	0	-
chr1	140721763	140724574	u:1434	0	-
chr1	140724575	140725230	u:1435	0	-
chr1	140725735	140727520	u:1436	0	-
chr1	140727521	140727943	u:1437	0	-
chr1	140748409	140748555	u:1438	0	-
chr1	140748556	140748609	u:1439	0	-
chr1	140748610	140748750	u:1440	0	-
chr1	140750147	140750249	u:1441	0	-
chr1	140752650	140753096	u:1442	0	-
chr1	140772849	140773222	u:1443	0	-
chr1	140773491	140773527	u:1444	0	-
chr1	141094831	141095148	u:1445	0	-
chr1	141126115	141128114	u:1446	0	-
chr1	141142194	141144240	u:1447	0	-
chr1	141144241	141144534	u:1448	0	-
chr1	141443639	141444276	u:1449	0	-
chr1	141471149	141471417	u:1450	0	-
chr1	141471418	141471950	u:1451	0	-
chr1	141472053	141472122	u:1452	0	-
chr1	141490330	141490513	u:1453	0	-
chr1	141494132	141494309	u:1454	0	-
chr1	141518631	141518808	u:1455	0	-
chr1	141524712	141524886	u:1456	0	-
chr1	141528386	141528488	u:1457	0	-
chr1	141594496	141594671	u:1458	0	-
chr1	141705931	141706868	u:1459	0	-
chr1	141706869	141706934	u:1460	0	-
chr1	141706935	141707034	u:1461	0	-
chr1	141707035	141707596	u:1462	0	-
chr1	141710010	141710193	u:1463	0	-
chr1	141713969	141714129	u:1464	0	-
chr1	141786802	141786979	u:1465	0	-
chr1	141787726	141787878	u:1466	0	-
chr1	141788086	141788269	u:1467	0	-
chr1	141811113	141811290	u:1468	0	-
chr1	141811661	141811856	u:1469	0	-
chr1	141820584	141820758	u:1470	0	-
chr1	141915352	141915498	u:1471	0	-
chr1	141980206	141982431	u:1472	0	-
chr1	141982432	141983099	u:1473	0	-
chr1	141985234	141985465	u:1474	0	-
chr1	141995446	141995623	u:1475	0	-
chr1	141997384	141997561	u:1476	0	-
chr1	141998161	141998335	u:1477	0	-
chr1	141998913	141999123	u:1478	0	-
chr1	141999284	141999461	u:1479	0	-
chr1	142001971	142002148	u:1480	0	-
chr1	142005068	142005248	u:1481	0	-
chr1	142005334	142005517	u:1482	0	-
chr1	142009009	142009183	u:1483	0	-
chr1	142015163	142015340	u:1484	0	-
chr1	142016447	142016630	u:1485	0	-
chr1	142032723	142032900	u:1486	0	-
chr1	142033272	142033467	u:1487	0	-
chr1	142040507	142040681	u:1488	0	-
chr1	142041796	142044402	u:1489	0	-
chr1	142051045	142051237	u:1490	0	-
chr1	142053836	142053913	u:1491	0	-
chr1	142059122	142059228	u:1492	0	-
chr1	142059527	142059713	u:1493	0	-
chr1	142079741	142079988	u:1494	0	-
chr1	145450746	145451230	u:1495	0	-
chr1	145451231	145453738	u:1496	0	-
chr1	145454507	145454628	u:1497	0	-
chr1	145454629	145454894	u:1498	0	-
chr1	145454895	145455650	u:1499	0	-
chr1	145597921	145603765	u:1500	0	-
chr1	145603766	145604044	u:1501	0	-
chr1	145604045	145604871	u:1502	0	-
chr1	145846468	145847122	u:1503	0	-
chr1	145847123	145847832	u:1504	0	-
chr1	145847833	145848118	u:1505	0	-
chr1	145848119	145848809	u:1506	0	-
chr1	145985784	145986630	u:1507	0	-
chr1	146091799	146092431	u:1508	0	-
chr1	146599968	146600941	u:1509	0	-
chr1	148266566	148268033	u:1510	0	-
chr1	148270066	148270170	u:1511	0	-
chr1	148274028	148274220	u:1512	0	-
chr1	148274739	148274831	u:1513	0	-
chr1	148278392	148278557	u:1514	0	-
chr1	148288132	148288232	u:1515	0	-
chr1	148291787	148292020	u:1516	0	-
chr1	148342029	148342171	u:1517	0	-
chr1	151268112	151268984	u:1518	0	-
chr1	151271550	151271736	u:1519	0	-
chr1	151272479	151272576	u:1520	0	-
chr1	151294535	151294733	u:1521	0	-
chr1	151296943	151297080	u:1522	0	-
chr1	151676751	151677190	u:1523	0	-
chr1	151923791	151924175	u:1524	0	-
chr1	151931709	151931769	u:1525	0	-
chr1	151934249	151934475	u:1526	0	-
chr1	151938733	151938821	u:1527	0	-
chr1	151946557	151946896	u:1528	0	-
chr1	152208440	152209742	u:1529	0	-
chr1	152209743	152209950	u:1530	0	-
chr1	152296542	152296790	u:1531	0	-
chr1	152296791	152296994	u:1532	0	-
chr1	152296995	152297113	u:1533	0	-
chr1	152409630	152410656	u:1534	0	-
chr1	152720878	152723431	u:1535	0	-
chr1	153214829	153215471	u:1536	0	-
chr1	153215472	153215718	u:1537	0	-
chr1	153217708	153217773	u:1538	0	-
chr1	153219437	153219504	u:1539	0	-
chr1	153226512	153226644	u:1540	0	-
chr1	153231446	153231634	u:1541	0	-
chr1	153238565	153238704	u:1542	0	-
chr1	153241738	153241902	u:1543	0	-
chr1	153244335	153244481	u:1544	0	-
chr1	153248209	153248303	u:1545	0	-
chr1	153250084	153250273	u:1546	0	-
chr1	153250924	153251026	u:1547	0	-
chr1	153252545	153252675	u:1548	0	-
chr1	153254705	153254765	u:1549	0	-
chr1	153257900	153258588	u:1550	0	-
chr1	153259920	153259976	u:1551	0	-
chr1	153267229	153267313	u:1552	0	-
chr1	153269163	153269250	u:1553	0	-
chr1	153270636	153270735	u:1554	0	-
chr1	153275426	153275565	u:1555	0	-
chr1	153316528	153316635	u:1556	0	-
chr1	153316636	153317508	u:1557	0	-
chr1	153317509	153318361	u:1558	0	-
chr1	153318362	153318445	u:1559	0	-
chr1	153699533	153701474	u:1560	0	-
chr1	153731654	153737908	u:1561	0	-
chr1	153737909	153737978	u:1562	0	-
chr1	153737979	153739714	u:1563	0	-
chr1	153739715	153740366	u:1564	0	-
chr1	153740367	153740562	u:1565	0	-
chr1	153762611	153762672	u:1566	0	-
chr1	153768176	153768253	u:1567	0	-
chr1	153827555	153827650	u:1568	0	-
chr1	153853674	153853897	u:1569	0	-
chr1	153937061	153937450	u:1570	0	-
chr1	154217866	154218392	u:1571	0	-
chr1	154363894	154364047	u:1572	0	-
chr1	154364048	154364654	u:1573	0	-
chr1	154364655	154365670	u:1574	0	-
chr1	154365671	154365886	u:1575	0	-
chr1	154365887	154365948	u:1576	0	-
chr1	154365949	154366138	u:1577	0	-
chr1	154622079	154622693	u:1578	0	-
chr1	154684125	154684231	u:1579	0	-
chr1	154684232	154685999	u:1580	0	-
chr1	154686000	154686401	u:1581	0	-
chr1	154969886	154971159	u:1582	0	-
chr1	155004439	155006060	u:1583	0	-
chr1	155066052	155067207	u:1584	0	-
chr1	155067208	155067569	u:1585	0	-
chr1	155067570	155068132	u:1586	0	-
chr1	155068133	155068376	u:1587	0	-
chr1	155068377	155068602	u:1588	0	-
chr1	155251316	155253731	u:1589	0	-
chr1	155253795	155253820	u:1590	0	-
chr1	155254731	155254920	u:1591	0	-
chr1	155255466	155255700	u:1592	0	-
chr1	155260668	155261363	u:1593	0	-
chr1	155302888	155303198	u:1594	0	-
chr1	155309682	155309766	u:1595	0	-
chr1	155309767	155309834	u:1596	0	-
chr1	155311470	155311543	u:1597	0	-
chr1	155311747	155311842	u:1598	0	-
chr1	155311984	155312198	u:1599	0	-
chr1	155312806	155312843	u:1600	0	-
chr1	155312844	155312907	u:1601	0	-
chr1	155314161	155314318	u:1602	0	-
chr1	155316003	155316086	u:1603	0	-
chr1	155316729	155316866	u:1604	0	-
chr1	155318749	155318941	u:1605	0	-
chr1	155319355	155319433	u:1606	0	-
chr1	155319530	155319692	u:1607	0	-
chr1	155319801	155319891	u:1608	0	-
chr1	155320276	155320413	u:1609	0	-
chr1	155322792	155322839	u:1610	0	-
chr1	155323969	155325218	u:1611	0	-
chr1	155325219	155325977	u:1612	0	-
chr1	155325995	155326108	u:1613	0	-
chr1	155328261	155328379	u:1614	0	-
chr1	155329871	155330012	u:1615	0	-
chr1	155330869	155331002	u:1616	0	-
chr1	155334662	155334790	u:1617	0	-
chr1	155350145	155350502	u:1618	0	-
chr1	155626517	155626807	u:1619	0	-
chr1	155628718	155628910	u:1620	0	-
chr1	155632272	155632368	u:1621	0	-
chr1	155637358	155637468	u:1622	0	-
chr1	155639751	155641009	u:1623	0	-
chr1	155641217	155641356	u:1624	0	-
chr1	155646923	155647098	u:1625	0	-
chr1	155649365	155649495	u:1626	0	-
chr1	155651143	155651258	u:1627	0	-
chr1	155651739	155651857	u:1628	0	-
chr1	155654810	155655004	u:1629	0	-
chr1	155655233	155655294	u:1630	0	-
chr1	155696672	155697746	u:1631	0	-
chr1	155697747	155698176	u:1632	0	-
chr1	155717376	155717506	u:1633	0	-
chr1	155744245	155746440	u:1634	0	-
chr1	155746441	155747338	u:1635	0	-
chr1	155884727	155885007	u:1636	0	-
chr1	155895239	155898680	u:1637	0	-
chr1	155924144	155925282	u:1638	0	-
chr1	155959325	155959459	u:1639	0	-
chr1	155963153	155963283	u:1640	0	-
chr1	155964569	155965081	u:1641	0	-
chr1	156088651	156088830	u:1642	0	-
chr1	156101405	156101461	u:1643	0	-
chr1	156103169	156103242	u:1644	0	-
chr1	156103732	156104036	u:1645	0	-
chr1	156237859	156239648	u:1646	0	-
chr1	156239649	156245522	u:1647	0	-
chr1	156910582	156910652	u:1648	0	-
chr1	156910653	156910988	u:1649	0	-
chr1	156912009	156912150	u:1650	0	-
chr1	156912345	156912525	u:1651	0	-
chr1	156912851	156913039	u:1652	0	-
chr1	156926832	156926973	u:1653	0	-
chr1	156927769	156927913	u:1654	0	-
chr1	156928321	156930394	u:1655	0	-
chr1	156943492	156944651	u:1656	0	-
chr1	156944652	156945633	u:1657	0	-
chr1	156974407	156975006	u:1658	0	-
chr1	156975007	156976180	u:1659	0	-
chr1	156976181	156976396	u:1660	0	-
chr1	156982918	156984557	u:1661	0	-
chr1	157059601	157060649	u:1662	0	-
chr1	157122787	157125905	u:1663	0	-
chr1	157125906	157126111	u:1664	0	-
chr1	157126112	157126945	u:1665	0	-
chr1	157126946	157128139	u:1666	0	-
chr1	157129313	157130329	u:1667	0	-
chr1	157367303	157368967	u:1668	0	-
chr1	157374155	157374238	u:1669	0	-
chr1	157548824	157549351	u:1670	0	-
chr1	157625285	157626298	u:1671	0	-
chr1	157648577	157650736	u:1672	0	-
chr1	157692090	157692487	u:1673	0	-
chr1	157692488	157695659	u:1674	0	-
chr1	157695660	157695692	u:1675	0	-
chr1	157806850	157806961	u:1676	0	-
chr1	157809604	157809690	u:1677	0	-
chr1	157819978	157820385	u:1678	0	-
chr1	157851714	157851860	u:1679	0	-
chr1	157851861	157852819	u:1680	0	-
chr1	157852820	157853903	u:1681	0	-
chr1	157853904	157854839	u:1682	0	-
chr1	157860447	157860504	u:1683	0	-
chr1	157864640	157864709	u:1684	0	-
chr1	157865347	157865660	u:1685	0	-
chr1	157867097	157867153	u:1686	0	-
chr1	157869429	157869510	u:1687	0	-
chr1	157870278	157870317	u:1688	0	-
chr1	157877516	157877561	u:1689	0	-
chr1	157878543	157878603	u:1690	0	-
chr1	157880855	157880930	u:1691	0	-
chr1	157882887	157883610	u:1692	0	-
chr1	157923087	157926026	u:1693	0	-
chr1	158185426	158185703	u:1694	0	-
chr1	158295060	158295742	u:1695	0	-
chr1	158358239	158358600	u:1696	0	-
chr1	158358601	158359926	u:1697	0	-
chr1	158359927	158360388	u:1698	0	-
chr1	158360389	158360704	u:1699	0	-
chr1	158360705	158361189	u:1700	0	-
chr1	158370281	158371347	u:1701	0	-
chr1	158583748	158584707	u:1702	0	-
chr1	158584708	158584806	u:1703	0	-
chr1	158584807	158585150	u:1704	0	-
chr1	158585151	158585457	u:1705	0	-
chr1	158585458	158586074	u:1706	0	-
chr1	158586602	158586727	u:1707	0	-
chr1	158596729	158596908	u:1708	0	-
chr1	158599501	158599767	u:1709	0	-
chr1	158603660	158603777	u:1710	0	-
chr1	158604216	158604470	u:1711	0	-
chr1	158608676	158611153	u:1712	0	-
chr1	158611154	158611541	u:1713	0	-
chr1	158631773	158635794	u:1714	0	-
chr1	158734297	158736886	u:1715	0	-
chr1	158736887	158738264	u:1716	0	-
chr1	158738265	158738959	u:1717	0	-
chr1	158738960	158739324	u:1718	0	-
chr1	158741575	158741667	u:1719	0	-
chr1	158743212	158743699	u:1720	0	-
chr1	158746655	158747844	u:1721	0	-
chr1	158749008	158749925	u:1722	0	-
chr1	159029278	159029473	u:1723	0	-
chr1	159065314	159070841	u:1724	0	-
chr1	159215115	159216817	u:1725	0	-
chr1	160175400	160175847	u:1726	0	-
chr1	160175848	160176328	u:1727	0	-
chr1	160641862	160645076	u:1728	0	-
chr1	160758787	160758873	u:1729	0	-
chr1	160762839	160762986	u:1730	0	-
chr1	160764880	160765074	u:1731	0	-
chr1	160897832	160898996	u:1732	0	-
chr1	162004866	162005279	u:1733	0	-
chr1	162015160	162016161	u:1734	0	-
chr1	162133046	162133290	u:1735	0	-
chr1	162133291	162133697	u:1736	0	-
chr1	162149304	162153153	u:1737	0	-
chr1	162153154	162153998	u:1738	0	-
chr1	162153999	162154346	u:1739	0	-
chr1	162186703	162187108	u:1740	0	-
chr1	162187109	162187397	u:1741	0	-
chr1	162187573	162187666	u:1742	0	-
chr1	162237306	162238042	u:1743	0	-
chr1	162239108	162239246	u:1744	0	-
chr1	162602582	162602779	u:1745	0	-
chr1	162938925	162939622	u:1746	0	-
chr1	162943015	162943152	u:1747	0	-
chr1	162947887	162948836	u:1748	0	-
chr1	162948837	162950537	u:1749	0	-
chr1	162959772	162959872	u:1750	0	-
chr1	162961935	162962895	u:1751	0	-
chr1	162964218	162964415	u:1752	0	-
chr1	162964908	162964979	u:1753	0	-
chr1	162970744	162971223	u:1754	0	-
chr1	162971224	162971619	u:1755	0	-
chr1	162971620	162971846	u:1756	0	-
chr1	162975090	162975364	u:1757	0	-
chr1	163018509	163018783	u:1758	0	-
chr1	163018784	163020642	u:1759	0	-
chr1	163023811	163023918	u:1760	0	-
chr1	163025659	163025868	u:1761	0	-
chr1	163026576	163029268	u:1762	0	-
chr1	163029272	163029416	u:1763	0	-
chr1	163031581	163031765	u:1764	0	-
chr1	163033109	163033225	u:1765	0	-
chr1	163035531	163035626	u:1766	0	-
chr1	163036837	163036996	u:1767	0	-
chr1	163037802	163039926	u:1768	0	-
chr1	163060519	163060583	u:1769	0	-
chr1	163061493	163061610	u:1770	0	-
chr1	163086954	163087229	u:1771	0	-
chr1	163170243	163171139	u:1772	0	-
chr1	163171140	163171372	u:1773	0	-
chr1	163171373	163171678	u:1774	0	-
chr1	163171679	163171851	u:1775	0	-
chr1	163656084	163656437	u:1776	0	-
chr1	163656688	163656808	u:1777	0	-
chr1	163710820	163710959	u:1778	0	-
chr1	163710960	163712101	u:1779	0	-
chr1	163713078	163713081	u:1780	0	-
chr1	163746241	163746975	u:1781	0	-
chr1	163746976	163748496	u:1782	0	-
chr1	163872222	163872520	u:1783	0	-
chr1	163912584	163912730	u:1784	0	-
chr1	163917433	163922152	u:1785	0	-
chr1	163936268	163936539	u:1786	0	-
chr1	163946584	163949922	u:1787	0	-
chr1	164248302	164251064	u:1788	0	-
chr1	164462258	164463802	u:1789	0	-
chr1	164463803	164464681	u:1790	0	-
chr1	164465972	164466104	u:1791	0	-
chr1	164467249	164467462	u:1792	0	-
chr1	164468962	164469125	u:1793	0	-
chr1	164471580	164473766	u:1794	0	-
chr1	164473767	164475854	u:1795	0	-
chr1	164476376	164476658	u:1796	0	-
chr1	164478234	164478476	u:1797	0	-
chr1	164577374	164577578	u:1798	0	-
chr1	164600858	164601915	u:1799	0	-
chr1	164601916	164603737	u:1800	0	-
chr1	164634500	164634501	u:1801	0	-
chr1	164650023	164650513	u:1802	0	-
chr1	164723319	164724013	u:1803	0	-
chr1	164724014	164724088	u:1804	0	-
chr1	164732984	164733630	u:1805	0	-
chr1	164758028	164759691	u:1806	0	-
chr1	164759692	164760102	u:1807	0	-
chr1	164803629	164804452	u:1808	0	-
chr1	164804453	164805056	u:1809	0	-
chr1	164805057	164805106	u:1810	0	-
chr1	164805107	164805173	u:1811	0	-
chr1	164805174	164806858	u:1812	0	-
chr1	164818209	164818748	u:1813	0	-
chr1	164846679	164846853	u:1814	0	-
chr1	164883928	164884308	u:1815	0	-
chr1	164893645	164894006	u:1816	0	-
chr1	164954433	164954573	u:1817	0	-
chr1	165175249	165177711	u:1818	0	-
chr1	165177712	165178527	u:1819	0	-
chr1	165182997	165185357	u:1820	0	-
chr1	165185408	165187887	u:1821	0	-
chr1	165315038	165316104	u:1822	0	-
chr1	165316105	165316828	u:1823	0	-
chr1	165322540	165322681	u:1824	0	-
chr1	165323719	165323857	u:1825	0	-
chr1	165324721	165324823	u:1826	0	-
chr1	165326938	165326965	u:1827	0	-
chr1	165326966	165327300	u:1828	0	-
chr1	165333653	165333772	u:1829	0	-
chr1	165633124	165633419	u:1830	0	-
chr1	165634133	165634294	u:1831	0	-
chr1	165647213	165647389	u:1832	0	-
chr1	165652599	165652657	u:1833	0	-
chr1	165655032	165655363	u:1834	0	-
chr1	165876124	165876480	u:1835	0	-
chr1	165884137	165884275	u:1836	0	-
chr1	166078722	166079263	u:1837	0	-
chr1	166079450	166079775	u:1838	0	-
chr1	166081989	166082348	u:1839	0	-
chr1	166219930	166221301	u:1840	0	-
chr1	166221302	166221515	u:1841	0	-
chr1	166221516	166222248	u:1842	0	-
chr1	166222249	166222356	u:1843	0	-
chr1	166367240	166367375	u:1844	0	-
chr1	166367376	166367944	u:1845	0	-
chr1	166367945	166368179	u:1846	0	-
chr1	166368180	166368406	u:1847	0	-
chr1	166861776	166861915	u:1848	0	-
chr1	166994155	166997287	u:1849	0	-
chr1	166998160	166998223	u:1850	0	-
chr1	166998588	166998839	u:1851	0	-
chr1	166999516	166999615	u:1852	0	-
chr1	167022016	167022061	u:1853	0	-
chr1	167067984	167069093	u:1854	0	-
chr1	167104119	167104470	u:1855	0	-
chr1	167104471	167104604	u:1856	0	-
chr1	167104605	167105847	u:1857	0	-
chr1	167105848	167108692	u:1858	0	-
chr1	167108693	167108816	u:1859	0	-
chr1	167108817	167109426	u:1860	0	-
chr1	167112182	167112212	u:1861	0	-
chr1	167113957	167114013	u:1862	0	-
chr1	167114100	167114136	u:1863	0	-
chr1	167115138	167115220	u:1864	0	-
chr1	167118378	167118465	u:1865	0	-
chr1	167124370	167124564	u:1866	0	-
chr1	167142417	167145049	u:1867	0	-
chr1	167145050	167145106	u:1868	0	-
chr1	167145107	167145712	u:1869	0	-
chr1	167145713	167145870	u:1870	0	-
chr1	167258826	167259631	u:1871	0	-
chr1	167259632	167259687	u:1872	0	-
chr1	167259688	167260052	u:1873	0	-
chr1	167260053	167260069	u:1874	0	-
chr1	167522312	167522370	u:1875	0	-
chr1	167522371	167523368	u:1876	0	-
chr1	167523369	167523808	u:1877	0	-
chr1	167531880	167531995	u:1878	0	-
chr1	167579076	167580034	u:1879	0	-
chr1	167580035	167580308	u:1880	0	-
chr1	167634653	167639863	u:1881	0	-
chr1	167805605	167805646	u:1882	0	-
chr1	167805647	167805868	u:1883	0	-
chr1	167810058	167810606	u:1884	0	-
chr1	167821419	167821866	u:1885	0	-
chr1	167861793	167861858	u:1886	0	-
chr1	167876032	167876133	u:1887	0	-
chr1	167882911	167882987	u:1888	0	-
chr1	167932692	167932765	u:1889	0	-
chr1	168028279	168028755	u:1890	0	-
chr1	168131516	168131678	u:1891	0	-
chr1	168314753	168315273	u:1892	0	-
chr1	168323742	168324503	u:1893	0	-
chr1	168324504	168324997	u:1894	0	-
chr1	168324998	168325527	u:1895	0	-
chr1	168325528	168328633	u:1896	0	-
chr1	168328634	168328830	u:1897	0	-
chr1	168413744	168413802	u:1898	0	-
chr1	168559102	168560299	u:1899	0	-
chr1	168592186	168593418	u:1900	0	-
chr1	168904154	168904864	u:1901	0	-
chr1	168912540	168912587	u:1902	0	-
chr1	168928422	168929859	u:1903	0	-
chr1	169156202	169156367	u:1904	0	-
chr1	169156368	169156512	u:1905	0	-
chr1	169260508	169260917	u:1906	0	-
chr1	169302092	169302514	u:1907	0	-
chr1	169302515	169302633	u:1908	0	-
chr1	169375806	169375931	u:1909	0	-
chr1	170049495	170050122	u:1910	0	-
chr1	170050123	170051611	u:1911	0	-
chr1	170083664	170083984	u:1912	0	-
chr1	170083985	170088463	u:1913	0	-
chr1	170088464	170088955	u:1914	0	-
chr1	170113660	170113703	u:1915	0	-
chr1	170138474	170139400	u:1916	0	-
chr1	170266122	170267450	u:1917	0	-
chr1	170354573	170357955	u:1918	0	-
chr1	171428065	171428448	u:1919	0	-
chr1	171428449	171428919	u:1920	0	-
chr1	171440248	171440446	u:1921	0	-
chr1	171671608	171671804	u:1922	0	-
chr1	171671805	171672451	u:1923	0	-
chr1	171672452	171673575	u:1924	0	-
chr1	171673576	171673811	u:1925	0	-
chr1	171879668	171879867	u:1926	0	-
chr1	171879868	171883163	u:1927	0	-
chr1	171885629	171885879	u:1928	0	-
chr1	171902438	171907652	u:1929	0	-
chr1	171907653	171907985	u:1930	0	-
chr1	172018926	172019075	u:1931	0	-
chr1	172040752	172040861	u:1932	0	-
chr1	172071353	172072133	u:1933	0	-
chr1	172072134	172072610	u:1934	0	-
chr1	172079802	172080399	u:1935	0	-
chr1	172129387	172129629	u:1936	0	-
chr1	172129630	172129997	u:1937	0	-
chr1	172228324	172231276	u:1938	0	-
chr1	172244826	172245600	u:1939	0	-
chr1	172245601	172247626	u:1940	0	-
chr1	172247627	172249021	u:1941	0	-
chr1	172250552	172250718	u:1942	0	-
chr1	172254042	172257828	u:1943	0	-
chr1	172259271	172259438	u:1944	0	-
chr1	172302799	172305374	u:1945	0	-
chr1	172634588	172634807	u:1946	0	-
chr1	172634808	172634868	u:1947	0	-
chr1	172634869	172637525	u:1948	0	-
chr1	172637526	172638824	u:1949	0	-
chr1	172638825	172640009	u:1950	0	-
chr1	172804319	172804701	u:1951	0	-
chr1	172809790	172809977	u:1952	0	-
chr1	172810260	172810357	u:1953	0	-
chr1	172810984	172811245	u:1954	0	-
chr1	172815197	172815671	u:1955	0	-
chr1	172847725	172848280	u:1956	0	-
chr1	172888749	172890688	u:1957	0	-
chr1	172890689	172890791	u:1958	0	-
chr1	172890792	172891144	u:1959	0	-
chr1	172894464	172895794	u:1960	0	-
chr1	172981300	172981798	u:1961	0	-
chr1	173059288	173059344	u:1962	0	-
chr1	173059345	173059931	u:1963	0	-
chr1	173103395	173103875	u:1964	0	-
chr1	173103876	173104513	u:1965	0	-
chr1	173147934	173148953	u:1966	0	-
chr1	173148954	173149242	u:1967	0	-
chr1	173149243	173149346	u:1968	0	-
chr1	173149347	173149651	u:1969	0	-
chr1	173159703	173159995	u:1970	0	-
chr1	173164991	173165218	u:1971	0	-
chr1	173165403	173165461	u:1972	0	-
chr1	173166487	173166571	u:1973	0	-
chr1	173166736	173166832	u:1974	0	-
chr1	173167270	173167400	u:1975	0	-
chr1	173167610	173168248	u:1976	0	-
chr1	173168291	173168503	u:1977	0	-
chr1	173168645	173168723	u:1978	0	-
chr1	173168840	173169028	u:1979	0	-
chr1	173169404	173169525	u:1980	0	-
chr1	173171077	173171225	u:1981	0	-
chr1	173171226	173171268	u:1982	0	-
chr1	173176221	173176328	u:1983	0	-
chr1	173177124	173177243	u:1984	0	-
chr1	173206117	173207122	u:1985	0	-
chr1	173207123	173207187	u:1986	0	-
chr1	173212077	173212433	u:1987	0	-
chr1	173212627	173212742	u:1988	0	-
chr1	173213004	173213112	u:1989	0	-
chr1	173213485	173213572	u:1990	0	-
chr1	173213768	173213872	u:1991	0	-
chr1	173214092	173214157	u:1992	0	-
chr1	173214594	173216336	u:1993	0	-
chr1	173216337	173217101	u:1994	0	-
chr1	173217892	173218092	u:1995	0	-
chr1	173218695	173219021	u:1996	0	-
chr1	173270702	173272266	u:1997	0	-
chr1	173272267	173272367	u:1998	0	-
chr1	173272368	173272661	u:1999	0	-
[truncated: 83,011 more rows]
