# Supplementary material for: Microarray Meta-Analysis of RNA-Binding Protein Functions in Alternative Polyadenylation
Source: PLoS One. 2014 Mar 12;9(3):e90774. doi: 10.1371/journal.pone.0090774 (PMC3951239; doi:10.1371/journal.pone.0090774)
Supplement: Table S4 — APA events annotated for Affymetrix mouse4302 microarray platform. (XLSX) [file pone.0090774.s004.xlsx]

## Sheet: APA database for mouse4302
APA.id	UTR.leftmost.id	UTR.leftmost.position	UTR.rightmost.id	UTR.rightmost.position	APA.type
Plekhg3:m4302:a:0	u:18057	chr12:77666854:77669057:+	u:18058	chr12:77679395:77680026:+	tag:alter
Nsa2:m4302:a:0	u:20452	chr13:97903601:97905185:-	u:20450	chr13:97899362:97900951:-	tag:alter
Nampt:m4302:t:0	u:17596	chr12:33535398:33535849:+	u:17599	chr12:33536472:33538233:+	tag:tandem
4931406P16Rik:m4302:t:0	u:67722	chr7:35022210:35023947:-	u:67721	chr7:35021726:35022209:-	tag:tandem
2010011I20Rik:m4302:t:0	u:47386	chr2:172178450:172179106:+	u:47387	chr2:172179107:172179389:+	tag:tandem
2010011I20Rik:m4302:t:1	u:47386	chr2:172178450:172179106:+	u:47389	chr2:172179434:172181248:+	tag:tandem
2010011I20Rik:m4302:t:2	u:47387	chr2:172179107:172179389:+	u:47389	chr2:172179434:172181248:+	tag:tandem
Mier3:m4302:t:0	u:22193	chr13:112505349:112507762:+	u:22194	chr13:112507763:112508734:+	tag:tandem
Aqp11:m4302:t:0	u:68945	chr7:104874001:104874888:-	u:68944	chr7:104872524:104874000:-	tag:tandem
Aqp11:m4302:t:1	u:68946	chr7:104874889:104875129:-	u:68944	chr7:104872524:104874000:-	tag:tandem
Aqp11:m4302:t:2	u:68946	chr7:104874889:104875129:-	u:68945	chr7:104874001:104874888:-	tag:tandem
Dag1:m4302:t:0	u:79271	chr9:108108289:108109338:-	u:79270	chr9:108107199:108108288:-	tag:tandem
Myadm:m4302:t:0	u:70206	chr7:3297687:3299218:+	u:70207	chr7:3299219:3299353:+	tag:tandem
Rsl1;Zfp429:m4302:t:0	u:20121	chr13:67490546:67490801:-	u:20120	chr13:67490238:67490545:-	tag:tandem
Zfp715:m4302:t:0	u:67834	chr7:50551893:50553243:-	u:67833	chr7:50551567:50551892:-	tag:tandem
Mllt6:m4302:t:0	u:14168	chr11:97542867:97543644:+	u:14170	chr11:97543870:97545396:+	tag:tandem
Mllt6:m4302:t:1	u:14168	chr11:97542867:97543644:+	u:14172	chr11:97545958:97546777:+	tag:tandem
Mllt6:m4302:t:2	u:14170	chr11:97543870:97545396:+	u:14172	chr11:97545958:97546777:+	tag:tandem
Zfp719:m4302:t:0	u:71004	chr7:50846567:50847236:+	u:71006	chr7:50847421:50849079:+	tag:tandem
Mllt3:m4302:t:0	u:52658	chr4:87418549:87419789:-	u:52655	chr4:87416052:87417837:-	tag:tandem
Mllt3:m4302:t:1	u:52659	chr4:87419790:87420050:-	u:52655	chr4:87416052:87417837:-	tag:tandem
Mllt3:m4302:t:2	u:52659	chr4:87419790:87420050:-	u:52658	chr4:87418549:87419789:-	tag:tandem
Btg1:m4302:t:0	u:8620	chr10:96081277:96082262:+	u:8622	chr10:96084644:96085446:+	tag:tandem
Nupl1:m4302:t:0	u:23216	chr14:60837017:60838304:-	u:23215	chr14:60836909:60837016:-	tag:tandem
Nupl1:m4302:t:1	u:23217	chr14:60838305:60838552:-	u:23215	chr14:60836909:60837016:-	tag:tandem
Nupl1:m4302:t:2	u:23218	chr14:60838553:60840399:-	u:23215	chr14:60836909:60837016:-	tag:tandem
Nupl1:m4302:t:3	u:23217	chr14:60838305:60838552:-	u:23216	chr14:60837017:60838304:-	tag:tandem
Nupl1:m4302:t:4	u:23218	chr14:60838553:60840399:-	u:23216	chr14:60837017:60838304:-	tag:tandem
Nupl1:m4302:t:5	u:23218	chr14:60838553:60840399:-	u:23217	chr14:60838305:60838552:-	tag:tandem
Sorbs3:m4302:t:0	u:23433	chr14:70580739:70580976:-	u:23432	chr14:70580275:70580738:-	tag:tandem
Sdhaf2;0610038F07Rik:m4302:t:0	u:38442	chr19:10576926:10577351:-	u:38440	chr19:10576128:10576838:-	tag:tandem
Tshz2:m4302:a:0	u:47373	chr2:169712078:169714003:+	u:47374	chr2:169738107:169738592:+	tag:alter
Tshz2:m4302:a:1	u:47373	chr2:169712078:169714003:+	u:47375	chr2:169895767:169897315:+	tag:alter
Tshz2:m4302:a:2	u:47374	chr2:169738107:169738592:+	u:47375	chr2:169895767:169897315:+	tag:alter
Trnt1:m4302:t:0	u:65855	chr6:106731640:106732054:+	u:65856	chr6:106732055:106732467:+	tag:tandem
Fam133b;AK172704:m4302:t:0	u:59429	chr5:3569031:3569810:+	u:59430	chr5:3569811:3570223:+	tag:tandem
Zbtb45:m4302:t:0	u:67017	chr7:13591015:13591472:-	u:67016	chr7:13589245:13591014:-	tag:tandem
Nipbl;AK020398:m4302:t:0	u:25791	chr15:8240306:8240617:-	u:25790	chr15:8239816:8240305:-	tag:tandem
Nipbl;AK020398:m4302:t:1	u:25792	chr15:8240618:8240886:-	u:25790	chr15:8239816:8240305:-	tag:tandem
Nipbl;AK020398:m4302:t:2	u:25792	chr15:8240618:8240886:-	u:25791	chr15:8240306:8240617:-	tag:tandem
Mtap6:m4302:a:0	u:71945	chr7:106466182:106468861:+	u:71946	chr7:106484518:106485647:+	tag:alter
Trim34a:m4302:a:0	u:72094	chr7:111409964:111410752:+	u:72104	chr7:111488885:111489197:+	tag:alter
Prepl:m4302:t:0	u:33546	chr17:85462799:85463866:-	u:33545	chr17:85461748:85462798:-	tag:tandem
Prepl:m4302:a:0	u:33548	chr17:85477399:85477828:-	u:33545	chr17:85461748:85462798:-	tag:alter
Prepl:m4302:a:1	u:33548	chr17:85477399:85477828:-	u:33546	chr17:85462799:85463866:-	tag:alter
Cdhr1:m4302:t:0	u:22768	chr14:37891421:37892590:-	u:22767	chr14:37891035:37891420:-	tag:tandem
Tcof1:m4302:a:0	u:36198	chr18:60975655:60975896:-	u:36196	chr18:60973391:60973842:-	tag:alter
Tcof1:m4302:a:1	u:36199	chr18:60975897:60976182:-	u:36196	chr18:60973391:60973842:-	tag:alter
Tcof1:m4302:a:2	u:36200	chr18:60977684:60977864:-	u:36196	chr18:60973391:60973842:-	tag:alter
Tcof1:m4302:t:0	u:36199	chr18:60975897:60976182:-	u:36198	chr18:60975655:60975896:-	tag:tandem
Tcof1:m4302:a:3	u:36200	chr18:60977684:60977864:-	u:36198	chr18:60975655:60975896:-	tag:alter
Tcof1:m4302:a:4	u:36200	chr18:60977684:60977864:-	u:36199	chr18:60975897:60976182:-	tag:alter
Usp3:m4302:t:0	u:78460	chr9:66365665:66365972:-	u:78459	chr9:66364033:66365664:-	tag:tandem
Usp3:m4302:t:1	u:78461	chr9:66365973:66366143:-	u:78459	chr9:66364033:66365664:-	tag:tandem
Usp3:m4302:t:2	u:78461	chr9:66365973:66366143:-	u:78460	chr9:66365665:66365972:-	tag:tandem
Usp4:m4302:t:0	u:81453	chr9:108294009:108294387:+	u:81454	chr9:108294388:108294592:+	tag:tandem
Pcf11:m4302:t:0	u:68907	chr7:99792763:99793071:-	u:68906	chr7:99792222:99792762:-	tag:tandem
Anp32e:m4302:t:0	u:50725	chr3:95749173:95749491:+	u:50727	chr3:95750331:95750898:+	tag:tandem
Anp32e:m4302:t:1	u:50725	chr3:95749173:95749491:+	u:50728	chr3:95750899:95751311:+	tag:tandem
Anp32e:m4302:t:2	u:50727	chr3:95750331:95750898:+	u:50728	chr3:95750899:95751311:+	tag:tandem
Fam13c:m4302:a:0	u:7809	chr10:69997646:69997775:+	u:7813	chr10:70020111:70021479:+	tag:alter
Bcas2:m4302:t:0	u:50916	chr3:102982404:102982548:+	u:50917	chr3:102982549:102982749:+	tag:tandem
Bcas3:m4302:a:0	u:13848	chr11:85323292:85324492:+	u:13851	chr11:85638703:85639559:+	tag:alter
Ttbk2:m4302:t:0	u:42554	chr2:120564446:120565012:-	u:42553	chr2:120558552:120564445:-	tag:tandem
Ammecr1l:m4302:a:0	u:37075	chr18:31935784:31937177:+	u:37078	chr18:31940868:31941593:+	tag:alter
Ammecr1l:m4302:a:1	u:37075	chr18:31935784:31937177:+	u:37080	chr18:31941891:31942382:+	tag:alter
Ammecr1l:m4302:a:2	u:37075	chr18:31935784:31937177:+	u:37081	chr18:31942383:31943421:+	tag:alter
Ammecr1l:m4302:t:0	u:37078	chr18:31940868:31941593:+	u:37080	chr18:31941891:31942382:+	tag:tandem
Ammecr1l:m4302:t:1	u:37078	chr18:31940868:31941593:+	u:37081	chr18:31942383:31943421:+	tag:tandem
Ammecr1l:m4302:t:2	u:37080	chr18:31941891:31942382:+	u:37081	chr18:31942383:31943421:+	tag:tandem
Ttbk1:m4302:t:0	u:32904	chr17:46579397:46582124:-	u:32903	chr17:46576470:46579396:-	tag:tandem
Ncor1:m4302:a:0	u:10108	chr11:62214875:62216964:-	u:10103	chr11:62130505:62130948:-	tag:alter
Cep164:m4302:t:0	u:77861	chr9:45575218:45576340:-	u:77860	chr9:45575029:45575217:-	tag:tandem
Lrriq3:m4302:a:0	u:51652	chr3:154800358:154800711:+	u:51653	chr3:154856731:154857241:+	tag:alter
Tinf2:m4302:t:0	u:23077	chr14:56297918:56298174:-	u:23076	chr14:56295046:56297917:-	tag:tandem
Ptprz1:m4302:a:0	u:64578	chr6:22953864:22954677:+	u:64579	chr6:23002112:23002824:+	tag:alter
Pold3:m4302:t:0	u:69042	chr7:107231919:107232161:-	u:69041	chr7:107230621:107231918:-	tag:tandem
Hdac2:m4302:a:0	u:7279	chr10:36713764:36715916:+	u:7280	chr10:36721365:36721642:+	tag:alter
Itch:m4302:a:0	u:46990	chr2:154999941:155002882:+	u:46995	chr2:155051910:155052591:+	tag:alter
Rbm4b;Rbm4:m4302:t:0	u:38120	chr19:4785151:4785567:-	u:38119	chr19:4784290:4785150:-	tag:tandem
Pvr:m4302:a:0	u:67235	chr7:20501113:20502160:-	u:67234	chr7:20488927:20490475:-	tag:alter
Pear1;Megf12:m4302:t:0	u:48369	chr3:87553802:87554067:-	u:48368	chr3:87553019:87553801:-	tag:tandem
Ikzf5:m4302:t:0	u:69813	chr7:138533874:138535150:-	u:69812	chr7:138532603:138533873:-	tag:tandem
Ikzf4:m4302:t:0	u:6903	chr10:128069471:128070907:-	u:6902	chr10:128067895:128069470:-	tag:tandem
Ikzf3:m4302:t:0	u:11092	chr11:98326600:98327552:-	u:11091	chr11:98326007:98326599:-	tag:tandem
Ikzf3:m4302:t:1	u:11093	chr11:98327553:98328299:-	u:11091	chr11:98326007:98326599:-	tag:tandem
Ikzf3:m4302:t:2	u:11093	chr11:98327553:98328299:-	u:11092	chr11:98326600:98327552:-	tag:tandem
Gm9790;Higd1a:m4302:t:0	u:79590	chr9:121758652:121759237:-	u:79588	chr9:121757676:121758210:-	tag:tandem
Mbtd1:m4302:t:0	u:14011	chr11:93805001:93806614:+	u:14012	chr11:93806615:93808241:+	tag:tandem
H2afj:m4302:t:0	u:66601	chr6:136757250:136757314:+	u:66602	chr6:136757315:136758594:+	tag:tandem
Prss44:m4302:a:0	u:81583	chr9:110719829:110720502:+	u:81584	chr9:110726897:110727026:+	tag:alter
Prss41:m4302:a:0	u:31900	chr17:23978075:23979029:-	u:31897	chr17:23973752:23974115:-	tag:alter
Golt1b:m4302:t:0	u:66691	chr6:142350190:142350652:+	u:66694	chr6:142351679:142352377:+	tag:tandem
Chmp5:m4302:t:0	u:54491	chr4:40911678:40911991:+	u:54492	chr4:40911992:40912334:+	tag:tandem
Recql5:m4302:a:0	u:11683	chr11:115757579:115758350:-	u:11682	chr11:115753991:115754371:-	tag:alter
Gcnt1:m4302:t:0	u:38675	chr19:17403150:17403562:-	u:38674	chr19:17400631:17403149:-	tag:tandem
Gcnt3:m4302:t:0	u:78631	chr9:69881349:69881777:-	u:78630	chr9:69879303:69881348:-	tag:tandem
Paqr8:m4302:t:0	u:2559	chr1:20925837:20927426:+	u:2561	chr1:20927498:20928338:+	tag:tandem
Paqr8:m4302:t:1	u:2559	chr1:20925837:20927426:+	u:2562	chr1:20928339:20928836:+	tag:tandem
Paqr8:m4302:t:2	u:2559	chr1:20925837:20927426:+	u:2563	chr1:20928837:20929137:+	tag:tandem
Paqr8:m4302:t:3	u:2561	chr1:20927498:20928338:+	u:2562	chr1:20928339:20928836:+	tag:tandem
Paqr8:m4302:t:4	u:2561	chr1:20927498:20928338:+	u:2563	chr1:20928837:20929137:+	tag:tandem
Paqr8:m4302:t:5	u:2562	chr1:20928339:20928836:+	u:2563	chr1:20928837:20929137:+	tag:tandem
Mark4:m4302:t:0	u:67160	chr7:20011424:20011760:-	u:67157	chr7:20010454:20010721:-	tag:tandem
Mark1:m4302:t:0	u:2240	chr1:186722120:186722402:-	u:2238	chr1:186720669:186721950:-	tag:tandem
Mark2:m4302:t:0	u:38348	chr19:7351213:7351579:-	u:38347	chr19:7349886:7351212:-	tag:tandem
Extl2:m4302:t:0	u:51108	chr3:115730416:115731254:+	u:51111	chr3:115731477:115731806:+	tag:tandem
Extl3:m4302:t:0	u:23305	chr14:65671549:65673449:-	u:23304	chr14:65670896:65671548:-	tag:tandem
Tia1:m4302:t:0	u:65632	chr6:86370409:86372112:+	u:65633	chr6:86372113:86373782:+	tag:tandem
Tia1:m4302:a:0	u:65632	chr6:86370409:86372112:+	u:65634	chr6:86380361:86381173:+	tag:alter
Tia1:m4302:a:1	u:65632	chr6:86370409:86372112:+	u:65635	chr6:86381174:86382173:+	tag:alter
Tia1:m4302:a:2	u:65632	chr6:86370409:86372112:+	u:65636	chr6:86382174:86382789:+	tag:alter
Tia1:m4302:a:3	u:65632	chr6:86370409:86372112:+	u:65637	chr6:86382790:86383398:+	tag:alter
Tia1:m4302:a:4	u:65633	chr6:86372113:86373782:+	u:65634	chr6:86380361:86381173:+	tag:alter
Tia1:m4302:a:5	u:65633	chr6:86372113:86373782:+	u:65635	chr6:86381174:86382173:+	tag:alter
Tia1:m4302:a:6	u:65633	chr6:86372113:86373782:+	u:65636	chr6:86382174:86382789:+	tag:alter
Tia1:m4302:a:7	u:65633	chr6:86372113:86373782:+	u:65637	chr6:86382790:86383398:+	tag:alter
Tia1:m4302:t:1	u:65634	chr6:86380361:86381173:+	u:65635	chr6:86381174:86382173:+	tag:tandem
Tia1:m4302:t:2	u:65634	chr6:86380361:86381173:+	u:65636	chr6:86382174:86382789:+	tag:tandem
Tia1:m4302:t:3	u:65634	chr6:86380361:86381173:+	u:65637	chr6:86382790:86383398:+	tag:tandem
Tia1:m4302:t:4	u:65635	chr6:86381174:86382173:+	u:65636	chr6:86382174:86382789:+	tag:tandem
Tia1:m4302:t:5	u:65635	chr6:86381174:86382173:+	u:65637	chr6:86382790:86383398:+	tag:tandem
Tia1:m4302:t:6	u:65636	chr6:86382174:86382789:+	u:65637	chr6:86382790:86383398:+	tag:tandem
Tmem164:m4302:t:0	u:84497	chrX:139268727:139272787:+	u:84498	chrX:139272788:139272913:+	tag:tandem
Tmem167:m4302:t:0	u:21896	chr13:90244050:90244181:+	u:21901	chr13:90244530:90244777:+	tag:tandem
Tmem167:m4302:t:1	u:21896	chr13:90244050:90244181:+	u:21905	chr13:90245838:90246927:+	tag:tandem
Tmem167:m4302:t:2	u:21896	chr13:90244050:90244181:+	u:21906	chr13:90246928:90247286:+	tag:tandem
Tmem167:m4302:t:3	u:21896	chr13:90244050:90244181:+	u:21908	chr13:90247486:90248675:+	tag:tandem
Tmem167:m4302:t:4	u:21896	chr13:90244050:90244181:+	u:21909	chr13:90248676:90249942:+	tag:tandem
Tmem167:m4302:t:5	u:21896	chr13:90244050:90244181:+	u:21910	chr13:90249943:90251861:+	tag:tandem
Tmem167:m4302:t:6	u:21901	chr13:90244530:90244777:+	u:21905	chr13:90245838:90246927:+	tag:tandem
Tmem167:m4302:t:7	u:21901	chr13:90244530:90244777:+	u:21906	chr13:90246928:90247286:+	tag:tandem
Tmem167:m4302:t:8	u:21901	chr13:90244530:90244777:+	u:21908	chr13:90247486:90248675:+	tag:tandem
Tmem167:m4302:t:9	u:21901	chr13:90244530:90244777:+	u:21909	chr13:90248676:90249942:+	tag:tandem
Tmem167:m4302:t:10	u:21901	chr13:90244530:90244777:+	u:21910	chr13:90249943:90251861:+	tag:tandem
Tmem167:m4302:t:11	u:21905	chr13:90245838:90246927:+	u:21906	chr13:90246928:90247286:+	tag:tandem
Tmem167:m4302:t:12	u:21905	chr13:90245838:90246927:+	u:21908	chr13:90247486:90248675:+	tag:tandem
Tmem167:m4302:t:13	u:21905	chr13:90245838:90246927:+	u:21909	chr13:90248676:90249942:+	tag:tandem
Tmem167:m4302:t:14	u:21905	chr13:90245838:90246927:+	u:21910	chr13:90249943:90251861:+	tag:tandem
Tmem167:m4302:t:15	u:21906	chr13:90246928:90247286:+	u:21908	chr13:90247486:90248675:+	tag:tandem
Tmem167:m4302:t:16	u:21906	chr13:90246928:90247286:+	u:21909	chr13:90248676:90249942:+	tag:tandem
Tmem167:m4302:t:17	u:21906	chr13:90246928:90247286:+	u:21910	chr13:90249943:90251861:+	tag:tandem
Tmem167:m4302:t:18	u:21908	chr13:90247486:90248675:+	u:21909	chr13:90248676:90249942:+	tag:tandem
Tmem167:m4302:t:19	u:21908	chr13:90247486:90248675:+	u:21910	chr13:90249943:90251861:+	tag:tandem
Tmem167:m4302:t:20	u:21909	chr13:90248676:90249942:+	u:21910	chr13:90249943:90251861:+	tag:tandem
Tmem168:m4302:t:0	u:62210	chr6:13531964:13532521:-	u:62209	chr6:13531294:13531963:-	tag:tandem
Tbc1d9:m4302:t:0	u:76087	chr8:85795509:85796346:+	u:76088	chr8:85796347:85796838:+	tag:tandem
Tbc1d1:m4302:t:0	u:60256	chr5:64741169:64741446:+	u:60257	chr5:64741447:64742724:+	tag:tandem
Tbc1d5:m4302:t:0	u:33007	chr17:50873329:50875269:-	u:33005	chr17:50873152:50873262:-	tag:tandem
1110003E01Rik:m4302:t:0	u:57562	chr5:65841044:65841428:-	u:57560	chr5:65838084:65839993:-	tag:tandem
Ap3m1:m4302:t:0	u:22522	chr14:21852964:21854028:-	u:22521	chr14:21850667:21852963:-	tag:tandem
Ap3m1:m4302:t:1	u:22523	chr14:21854029:21854826:-	u:22521	chr14:21850667:21852963:-	tag:tandem
Ap3m1:m4302:t:2	u:22526	chr14:21855199:21855824:-	u:22521	chr14:21850667:21852963:-	tag:tandem
Ap3m1:m4302:t:3	u:22523	chr14:21854029:21854826:-	u:22522	chr14:21852964:21854028:-	tag:tandem
Ap3m1:m4302:t:4	u:22526	chr14:21855199:21855824:-	u:22522	chr14:21852964:21854028:-	tag:tandem
Ap3m1:m4302:t:5	u:22526	chr14:21855199:21855824:-	u:22523	chr14:21854029:21854826:-	tag:tandem
Ap3m2:m4302:a:0	u:73226	chr8:23906895:23907479:-	u:73223	chr8:23897825:23899730:-	tag:alter
Limd2:m4302:t:0	u:11421	chr11:106019355:106019987:-	u:11419	chr11:106017566:106019028:-	tag:tandem
9130011J15Rik:m4302:t:0	u:73860	chr8:75089787:75090837:-	u:73859	chr8:75089097:75089786:-	tag:tandem
9130011J15Rik:m4302:t:1	u:73861	chr8:75090838:75091229:-	u:73859	chr8:75089097:75089786:-	tag:tandem
9130011J15Rik:m4302:t:2	u:73861	chr8:75090838:75091229:-	u:73860	chr8:75089787:75090837:-	tag:tandem
Secisbp2:m4302:t:0	u:21398	chr13:51778750:51779014:+	u:21399	chr13:51779015:51779220:+	tag:tandem
Ctdspl2:m4302:a:0	u:46252	chr2:121819255:121819931:+	u:46255	chr2:121837000:121837799:+	tag:alter
Ctdspl2:m4302:a:1	u:46252	chr2:121819255:121819931:+	u:46259	chr2:121839376:121841056:+	tag:alter
Ctdspl2:m4302:t:0	u:46255	chr2:121837000:121837799:+	u:46259	chr2:121839376:121841056:+	tag:tandem
Cacna1e:m4302:t:0	u:1647	chr1:156239649:156245522:-	u:1646	chr1:156237859:156239648:-	tag:tandem
Impad1:m4302:t:0	u:51703	chr4:4691501:4693905:-	u:51700	chr4:4689628:4691177:-	tag:tandem
Xrn2:m4302:t:0	u:46655	chr2:146903395:146903737:+	u:46656	chr2:146903738:146904557:+	tag:tandem
mACS4;Acsl4:m4302:t:0	u:83242	chrX:138755076:138755377:-	u:83241	chrX:138752536:138755075:-	tag:tandem
Cnot2:m4302:t:0	u:6657	chr10:115922564:115922842:-	u:6656	chr10:115922217:115922563:-	tag:tandem
Cnot2:m4302:t:1	u:6659	chr10:115923056:115923255:-	u:6656	chr10:115922217:115922563:-	tag:tandem
Cnot2:m4302:t:2	u:6659	chr10:115923056:115923255:-	u:6657	chr10:115922564:115922842:-	tag:tandem
Cnot7:m4302:t:0	u:73444	chr8:41578390:41579286:-	u:73443	chr8:41577953:41578389:-	tag:tandem
Cnot4:m4302:a:0	u:62448	chr6:34995163:34995785:-	u:62445	chr6:34972065:34973130:-	tag:alter
Nfic:m4302:t:0	u:6160	chr10:80861708:80863816:-	u:6159	chr10:80859115:80861707:-	tag:tandem
Nfib:m4302:t:0	u:52571	chr4:81936969:81939839:-	u:52570	chr4:81936077:81936968:-	tag:tandem
Nfib:m4302:t:1	u:52572	chr4:81939840:81942697:-	u:52570	chr4:81936077:81936968:-	tag:tandem
Nfib:m4302:a:0	u:52576	chr4:82141888:82144106:-	u:52570	chr4:81936077:81936968:-	tag:alter
Nfib:m4302:t:2	u:52572	chr4:81939840:81942697:-	u:52571	chr4:81936969:81939839:-	tag:tandem
Nfib:m4302:a:1	u:52576	chr4:82141888:82144106:-	u:52571	chr4:81936969:81939839:-	tag:alter
Nfib:m4302:a:2	u:52576	chr4:82141888:82144106:-	u:52572	chr4:81939840:81942697:-	tag:alter
Nfia:m4302:t:0	u:55162	chr4:97777926:97780706:+	u:55164	chr4:97780806:97785566:+	tag:tandem
Cxcr7:m4302:t:0	u:3557	chr1:92111484:92112083:+	u:3558	chr1:92112084:92112302:+	tag:tandem
Ttyh1:m4302:t:0	u:70228	chr7:4085843:4086533:+	u:70230	chr7:4086941:4087847:+	tag:tandem
Ttyh1:m4302:t:1	u:70228	chr7:4085843:4086533:+	u:70231	chr7:4087848:4088323:+	tag:tandem
Ttyh1:m4302:t:2	u:70230	chr7:4086941:4087847:+	u:70231	chr7:4087848:4088323:+	tag:tandem
Fbxl20:m4302:t:0	u:11081	chr11:97950009:97950904:-	u:11079	chr11:97943868:97948731:-	tag:tandem
Fbxl20:m4302:a:0	u:11082	chr11:97968540:97970803:-	u:11079	chr11:97943868:97948731:-	tag:alter
Fbxl20:m4302:a:1	u:11082	chr11:97968540:97970803:-	u:11081	chr11:97950009:97950904:-	tag:alter
5930412G12Rik:m4302:a:0	u:58838	chr5:129100808:129101639:-	u:58832	chr5:129084965:129085160:-	tag:alter
Dlc1:m4302:t:0	u:73414	chr8:37631579:37633336:-	u:73411	chr8:37630793:37631380:-	tag:tandem
Pkig:m4302:t:0	u:47206	chr2:163551272:163551640:+	u:47207	chr2:163551641:163551893:+	tag:tandem
Pkia:m4302:t:0	u:49584	chr3:7443251:7444244:+	u:49585	chr3:7444245:7445365:+	tag:tandem
1810026J23Rik:m4302:t:0	u:79882	chr9:21398897:21399431:+	u:79884	chr9:21399511:21400098:+	tag:tandem
1810026J23Rik:m4302:t:1	u:79882	chr9:21398897:21399431:+	u:79885	chr9:21400099:21400332:+	tag:tandem
1810026J23Rik:m4302:t:2	u:79884	chr9:21399511:21400098:+	u:79885	chr9:21400099:21400332:+	tag:tandem
Lnpep:m4302:a:0	u:31808	chr17:17706728:17707792:-	u:31806	chr17:17664686:17666712:-	tag:alter
Gsr:m4302:t:0	u:75460	chr8:34807767:34808102:+	u:75461	chr8:34808103:34808633:+	tag:tandem
Gsn:m4302:t:0	u:44809	chr2:35163186:35163272:+	u:44810	chr2:35163273:35163419:+	tag:tandem
Wnt6:m4302:t:0	u:3301	chr1:74831174:74831519:+	u:3302	chr1:74831520:74831892:+	tag:tandem
Sod2:m4302:t:0	u:33828	chr17:13208037:13208218:+	u:33830	chr17:13208483:13210984:+	tag:tandem
Tmprss2:m4302:t:0	u:30110	chr16:97787595:97791962:-	u:30109	chr16:97786289:97787594:-	tag:tandem
Tmprss4:m4302:t:0	u:77849	chr9:44980983:44981479:-	u:77848	chr9:44980809:44980982:-	tag:tandem
Id4:m4302:t:0	u:21321	chr13:48358320:48358981:+	u:21322	chr13:48358982:48359222:+	tag:tandem
Id4:m4302:t:1	u:21321	chr13:48358320:48358981:+	u:21324	chr13:48359405:48359880:+	tag:tandem
Id4:m4302:t:2	u:21321	chr13:48358320:48358981:+	u:21326	chr13:48360180:48361393:+	tag:tandem
Id4:m4302:t:3	u:21322	chr13:48358982:48359222:+	u:21324	chr13:48359405:48359880:+	tag:tandem
Id4:m4302:t:4	u:21322	chr13:48358982:48359222:+	u:21326	chr13:48360180:48361393:+	tag:tandem
Id4:m4302:t:5	u:21324	chr13:48359405:48359880:+	u:21326	chr13:48360180:48361393:+	tag:tandem
Tpd52:m4302:t:0	u:47755	chr3:8929597:8930612:-	u:47753	chr3:8928628:8929435:-	tag:tandem
Tpd52:m4302:t:1	u:47756	chr3:8930613:8930899:-	u:47753	chr3:8928628:8929435:-	tag:tandem
Tpd52:m4302:t:2	u:47757	chr3:8930900:8931051:-	u:47753	chr3:8928628:8929435:-	tag:tandem
Tpd52:m4302:t:3	u:47756	chr3:8930613:8930899:-	u:47755	chr3:8929597:8930612:-	tag:tandem
Tpd52:m4302:t:4	u:47757	chr3:8930900:8931051:-	u:47755	chr3:8929597:8930612:-	tag:tandem
Tpd52:m4302:t:5	u:47757	chr3:8930900:8931051:-	u:47756	chr3:8930613:8930899:-	tag:tandem
Trub2:m4302:t:0	u:41327	chr2:29632463:29633150:-	u:41326	chr2:29631629:29632462:-	tag:tandem
Ids:m4302:t:0	u:82714	chrX:67598329:67599375:-	u:82713	chrX:67596325:67598328:-	tag:tandem
Ide:m4302:t:0	u:38955	chr19:37344165:37345071:-	u:38954	chr19:37343231:37344164:-	tag:tandem
Arpp21:m4302:t:0	u:79380	chr9:112084981:112085208:-	u:79379	chr9:112083487:112084980:-	tag:tandem
Barhl1:m4302:t:0	u:41316	chr2:28764493:28765147:-	u:41315	chr2:28763200:28764492:-	tag:tandem
Gsta3:m4302:t:0	u:2570	chr1:21255043:21255292:+	u:2571	chr1:21255293:21255443:+	tag:tandem
Gsta3:m4302:t:1	u:2570	chr1:21255043:21255292:+	u:2572	chr1:21255444:21255655:+	tag:tandem
Gsta3:m4302:t:2	u:2571	chr1:21255293:21255443:+	u:2572	chr1:21255444:21255655:+	tag:tandem
Ccnyl1:m4302:t:0	u:3170	chr1:64770783:64771881:+	u:3171	chr1:64771882:64772218:+	tag:tandem
Aacs:m4302:t:0	u:61453	chr5:125996723:125997775:+	u:61454	chr5:125997776:125999136:+	tag:tandem
Cmah;CMAH:m4302:t:0	u:21021	chr13:24530990:24531234:+	u:21022	chr13:24531235:24531542:+	tag:tandem
Cmah;CMAH:m4302:a:0	u:21021	chr13:24530990:24531234:+	u:21028	chr13:24561639:24562882:+	tag:alter
Cmah;CMAH:m4302:a:1	u:21021	chr13:24530990:24531234:+	u:21029	chr13:24562883:24569153:+	tag:alter
Cmah;CMAH:m4302:a:2	u:21022	chr13:24531235:24531542:+	u:21028	chr13:24561639:24562882:+	tag:alter
Cmah;CMAH:m4302:a:3	u:21022	chr13:24531235:24531542:+	u:21029	chr13:24562883:24569153:+	tag:alter
Cmah;CMAH:m4302:t:1	u:21028	chr13:24561639:24562882:+	u:21029	chr13:24562883:24569153:+	tag:tandem
Lrrc14:m4302:t:0	u:28112	chr15:76544566:76545267:+	u:28115	chr15:76545582:76548125:+	tag:tandem
Basp1:m4302:t:0	u:25871	chr15:25293434:25293983:-	u:25870	chr15:25293215:25293433:-	tag:tandem
Camsap1l1:m4302:t:0	u:1404	chr1:138165742:138167034:-	u:1403	chr1:138164832:138165741:-	tag:tandem
bMRP64;Mrpl51:m4302:t:0	u:66294	chr6:125143240:125143558:+	u:66296	chr6:125143679:125144419:+	tag:tandem
bMRP64;Mrpl51:m4302:t:1	u:66294	chr6:125143240:125143558:+	u:66297	chr6:125144420:125146121:+	tag:tandem
bMRP64;Mrpl51:m4302:t:2	u:66296	chr6:125143679:125144419:+	u:66297	chr6:125144420:125146121:+	tag:tandem
Glb1l2:m4302:t:0	u:77534	chr9:26571353:26572321:-	u:77533	chr9:26570629:26571352:-	tag:tandem
mKIAA4128;Osbpl6:m4302:t:0	u:45297	chr2:76433930:76434101:+	u:45299	chr2:76434636:76437538:+	tag:tandem
Zcchc12:m4302:t:0	u:83739	chrX:33738635:33738825:+	u:83740	chrX:33738826:33739152:+	tag:tandem
Zcchc17:m4302:t:0	u:53464	chr4:129993689:129993890:-	u:53463	chr4:129993320:129993688:-	tag:tandem
Zcchc14:m4302:t:0	u:74716	chr8:124124261:124126175:-	u:74715	chr8:124122599:124124260:-	tag:tandem
Krt20:m4302:t:0	u:11139	chr11:99290028:99290294:-	u:11138	chr11:99289717:99290027:-	tag:tandem
Dnaja2:m4302:t:0	u:74064	chr8:88062700:88063114:-	u:74060	chr8:88061533:88062161:-	tag:tandem
Dnaja3:m4302:a:0	u:30163	chr16:4693595:4694244:+	u:30166	chr16:4706959:4707622:+	tag:alter
Dnaja1:m4302:t:0	u:54481	chr4:40680401:40680599:+	u:54482	chr4:40680600:40680930:+	tag:tandem
Dnaja4:m4302:t:0	u:80390	chr9:54562483:54563214:+	u:80391	chr9:54563215:54564123:+	tag:tandem
Acer3:m4302:t:0	u:68964	chr7:105364929:105365400:-	u:68962	chr7:105362320:105364817:-	tag:tandem
Recql:m4302:t:0	u:64276	chr6:142310645:142311239:-	u:64275	chr6:142310418:142310644:-	tag:tandem
Agbl5:m4302:a:0	u:59851	chr5:31198138:31198471:+	u:59858	chr5:31208488:31209039:+	tag:alter
Ikbkb;IKKbeta:m4302:t:0	u:73197	chr8:23770128:23771861:-	u:73196	chr8:23769677:23770127:-	tag:tandem
Ikbkb;IKKbeta:m4302:a:0	u:73214	chr8:23791684:23792224:-	u:73196	chr8:23769677:23770127:-	tag:alter
Ikbkb;IKKbeta:m4302:a:1	u:73214	chr8:23791684:23792224:-	u:73197	chr8:23770128:23771861:-	tag:alter
Stard7:m4302:a:0	u:46351	chr2:127110362:127111440:+	u:46353	chr2:127124262:127124669:+	tag:alter
Stard4:m4302:t:0	u:35884	chr18:33361075:33362644:-	u:35883	chr18:33358947:33361074:-	tag:tandem
Stard4:m4302:t:1	u:35885	chr18:33362645:33363239:-	u:35883	chr18:33358947:33361074:-	tag:tandem
Stard4:m4302:t:2	u:35885	chr18:33362645:33363239:-	u:35884	chr18:33361075:33362644:-	tag:tandem
Stard5:m4302:t:0	u:71789	chr7:90789079:90789441:+	u:71793	chr7:90790063:90790594:+	tag:tandem
Stard5:m4302:t:1	u:71789	chr7:90789079:90789441:+	u:71794	chr7:90790595:90790837:+	tag:tandem
Stard5:m4302:t:2	u:71793	chr7:90790063:90790594:+	u:71794	chr7:90790595:90790837:+	tag:tandem
Dock8:m4302:a:0	u:40068	chr19:25139953:25141595:+	u:40072	chr19:25275792:25276424:+	tag:alter
Dock4:m4302:a:0	u:17657	chr12:41452494:41454031:+	u:17660	chr12:41571252:41573074:+	tag:alter
Dock4:m4302:a:1	u:17657	chr12:41452494:41454031:+	u:17661	chr12:41573075:41573458:+	tag:alter
Dock4:m4302:t:0	u:17660	chr12:41571252:41573074:+	u:17661	chr12:41573075:41573458:+	tag:tandem
Dock5:m4302:t:0	u:23361	chr14:68370140:68373675:-	u:23360	chr14:68369961:68370139:-	tag:tandem
Dock5:m4302:t:1	u:23362	chr14:68373676:68374029:-	u:23360	chr14:68369961:68370139:-	tag:tandem
Dock5:m4302:t:2	u:23363	chr14:68374030:68374474:-	u:23360	chr14:68369961:68370139:-	tag:tandem
Dock5:m4302:t:3	u:23362	chr14:68373676:68374029:-	u:23361	chr14:68370140:68373675:-	tag:tandem
Dock5:m4302:t:4	u:23363	chr14:68374030:68374474:-	u:23361	chr14:68370140:68373675:-	tag:tandem
Dock5:m4302:t:5	u:23363	chr14:68374030:68374474:-	u:23362	chr14:68373676:68374029:-	tag:tandem
Hsd17b13:m4302:a:0	u:58044	chr5:104392480:104392791:-	u:58043	chr5:104384461:104385202:-	tag:alter
Hsd17b11:m4302:t:0	u:58046	chr5:104419064:104419528:-	u:58045	chr5:104418784:104419063:-	tag:tandem
Hsd17b11:m4302:a:0	u:58047	chr5:104430751:104432186:-	u:58045	chr5:104418784:104419063:-	tag:alter
Hsd17b11:m4302:a:1	u:58047	chr5:104430751:104432186:-	u:58046	chr5:104419064:104419528:-	tag:alter
Slc23a1:m4302:t:0	u:35957	chr18:35774863:35775341:-	u:35955	chr18:35773551:35774257:-	tag:tandem
Trdmt1:m4302:t:0	u:41004	chr2:13432808:13433144:-	u:41002	chr2:13431788:13432369:-	tag:tandem
Bbx:m4302:t:0	u:29687	chr16:50195894:50197671:-	u:29685	chr16:50191957:50192989:-	tag:tandem
Dusp18:m4302:t:0	u:12091	chr11:3797581:3799895:+	u:12092	chr11:3799896:3800861:+	tag:tandem
Dusp15:m4302:a:0	u:43287	chr2:152770657:152770893:-	u:43285	chr2:152766731:152768599:-	tag:alter
Dusp10:m4302:t:0	u:4813	chr1:185898402:185898765:+	u:4814	chr1:185898766:185899514:+	tag:tandem
Slc20a1:m4302:a:0	u:46399	chr2:129025811:129026913:+	u:46400	chr2:129030049:129030839:+	tag:alter
Slc20a1:m4302:a:1	u:46399	chr2:129025811:129026913:+	u:46401	chr2:129036581:129037347:+	tag:alter
Slc20a1:m4302:a:2	u:46400	chr2:129030049:129030839:+	u:46401	chr2:129036581:129037347:+	tag:alter
Cadm2:m4302:t:0	u:29810	chr16:66660884:66661323:-	u:29809	chr16:66655666:66660883:-	tag:tandem
Cadm2:m4302:t:1	u:29811	chr16:66661324:66662589:-	u:29809	chr16:66655666:66660883:-	tag:tandem
Cadm2:m4302:t:2	u:29812	chr16:66662590:66663337:-	u:29809	chr16:66655666:66660883:-	tag:tandem
Cadm2:m4302:t:3	u:29811	chr16:66661324:66662589:-	u:29810	chr16:66660884:66661323:-	tag:tandem
Cadm2:m4302:t:4	u:29812	chr16:66662590:66663337:-	u:29810	chr16:66660884:66661323:-	tag:tandem
Cadm2:m4302:t:5	u:29812	chr16:66662590:66663337:-	u:29811	chr16:66661324:66662589:-	tag:tandem
Cadm3:m4302:t:0	u:2046	chr1:175264981:175266118:-	u:2045	chr1:175264385:175264980:-	tag:tandem
Cadm3:m4302:t:1	u:2047	chr1:175266119:175267151:-	u:2045	chr1:175264385:175264980:-	tag:tandem
Cadm3:m4302:t:2	u:2047	chr1:175266119:175267151:-	u:2046	chr1:175264981:175266118:-	tag:tandem
Srcin1:m4302:t:0	u:11038	chr11:97372798:97373250:-	u:11037	chr11:97370648:97372797:-	tag:tandem
Srcin1:m4302:t:1	u:11039	chr11:97373251:97373827:-	u:11037	chr11:97370648:97372797:-	tag:tandem
Srcin1:m4302:t:2	u:11039	chr11:97373251:97373827:-	u:11038	chr11:97372798:97373250:-	tag:tandem
Hsf2bp:m4302:t:0	u:32384	chr17:32083027:32083547:-	u:32383	chr17:32081714:32083026:-	tag:tandem
Ski:m4302:t:0	u:54125	chr4:154529651:154530103:-	u:54123	chr4:154528478:154529593:-	tag:tandem
Usp1:m4302:t:0	u:55200	chr4:98601496:98601827:+	u:55201	chr4:98601828:98602230:+	tag:tandem
Pdk1:m4302:a:0	u:45187	chr2:71721899:71723682:+	u:45192	chr2:71738040:71740082:+	tag:alter
Pdk1:m4302:a:1	u:45187	chr2:71721899:71723682:+	u:45193	chr2:71740083:71741914:+	tag:alter
Pdk1:m4302:t:0	u:45192	chr2:71738040:71740082:+	u:45193	chr2:71740083:71741914:+	tag:tandem
Grpel2:m4302:t:0	u:36259	chr18:61874664:61875133:-	u:36258	chr18:61872077:61874663:-	tag:tandem
Grpel2:m4302:t:1	u:36260	chr18:61875134:61875781:-	u:36258	chr18:61872077:61874663:-	tag:tandem
Grpel2:m4302:t:2	u:36260	chr18:61875134:61875781:-	u:36259	chr18:61874664:61875133:-	tag:tandem
4931429I11Rik:m4302:t:0	u:77698	chr9:40703379:40703621:-	u:77697	chr9:40702932:40703378:-	tag:tandem
Prkrir:m4302:t:0	u:71936	chr7:105865413:105865856:+	u:71937	chr7:105865857:105866575:+	tag:tandem
Ankrd33b:m4302:t:0	u:25882	chr15:31222936:31226903:-	u:25881	chr15:31221233:31222935:-	tag:tandem
Ankrd33b:m4302:a:0	u:25883	chr15:31253710:31254169:-	u:25881	chr15:31221233:31222935:-	tag:alter
Ankrd33b:m4302:a:1	u:25884	chr15:31254170:31254778:-	u:25881	chr15:31221233:31222935:-	tag:alter
Ankrd33b:m4302:a:2	u:25883	chr15:31253710:31254169:-	u:25882	chr15:31222936:31226903:-	tag:alter
Ankrd33b:m4302:a:3	u:25884	chr15:31254170:31254778:-	u:25882	chr15:31222936:31226903:-	tag:alter
Ankrd33b:m4302:t:1	u:25884	chr15:31254170:31254778:-	u:25883	chr15:31253710:31254169:-	tag:tandem
Hif3a:m4302:t:0	u:67098	chr7:17616643:17616854:-	u:67097	chr7:17616342:17616642:-	tag:tandem
Hif3a:m4302:t:1	u:67099	chr7:17616855:17620837:-	u:67097	chr7:17616342:17616642:-	tag:tandem
Hif3a:m4302:t:2	u:67099	chr7:17616855:17620837:-	u:67098	chr7:17616643:17616854:-	tag:tandem
Golga1:m4302:a:0	u:41591	chr2:38902543:38902878:-	u:41577	chr2:38872023:38873168:-	tag:alter
Gm6635;Rpl31:m4302:t:0	u:2733	chr1:39428339:39428507:+	u:2734	chr1:39428508:39428755:+	tag:tandem
Vps13a:m4302:t:0	u:38594	chr19:16690176:16690891:-	u:38592	chr19:16689855:16690078:-	tag:tandem
Abcc9:m4302:t:0	u:64285	chr6:142537653:142539023:-	u:64284	chr6:142536466:142537652:-	tag:tandem
Abcc5:m4302:t:0	u:29204	chr16:20331987:20332277:-	u:29203	chr16:20331376:20331986:-	tag:tandem
Abcc5:m4302:a:0	u:29230	chr16:20400833:20404614:-	u:29203	chr16:20331376:20331986:-	tag:alter
Abcc5:m4302:a:1	u:29230	chr16:20400833:20404614:-	u:29204	chr16:20331987:20332277:-	tag:alter
Abcc6:m4302:t:0	u:68092	chr7:53231837:53232205:-	u:68091	chr7:53231750:53231836:-	tag:tandem
Nudcd2:m4302:t:0	u:12521	chr11:40552744:40553131:+	u:12522	chr11:40553132:40553548:+	tag:tandem
Nudcd1:m4302:a:0	u:26015	chr15:44250404:44252039:-	u:26013	chr15:44206773:44207939:-	tag:alter
Preb:m4302:t:0	u:57197	chr5:31257416:31258056:-	u:57196	chr5:31254040:31257415:-	tag:tandem
Pex11a:m4302:t:0	u:68686	chr7:86882150:86882796:-	u:68685	chr7:86880843:86882149:-	tag:tandem
Sqrdl:m4302:a:0	u:46304	chr2:122625770:122626504:+	u:46305	chr2:122635074:122635288:+	tag:alter
Spna2:m4302:t:0	u:44620	chr2:29886616:29886827:+	u:44621	chr2:29886828:29886969:+	tag:tandem
Pbxip1:m4302:t:0	u:50502	chr3:89252688:89252976:+	u:50503	chr3:89252977:89254873:+	tag:tandem
Masp1:m4302:a:0	u:29334	chr16:23479382:23480160:-	u:29333	chr16:23468434:23469919:-	tag:alter
Masp2:m4302:t:0	u:56467	chr4:147988642:147989303:+	u:56468	chr4:147989304:147989590:+	tag:tandem
Zfp52:m4302:t:0	u:33980	chr17:21699030:21699178:+	u:33981	chr17:21699179:21699564:+	tag:tandem
Cask:m4302:t:0	u:82257	chrX:13098457:13098907:-	u:82254	chrX:13094204:13098118:-	tag:tandem
Cask:m4302:t:1	u:82259	chrX:13099048:13099296:-	u:82254	chrX:13094204:13098118:-	tag:tandem
Cask:m4302:t:2	u:82259	chrX:13099048:13099296:-	u:82257	chrX:13098457:13098907:-	tag:tandem
abParts:m4302:a:0	u:16520	chr12:114597777:114598198:-	u:16514	chr12:114567087:114567509:-	tag:alter
abParts:m4302:a:1	u:29182	chr16:19198489:19198947:-	u:29176	chr16:19061717:19062164:-	tag:alter
Krr1:m4302:t:0	u:8747	chr10:111421737:111422868:+	u:8748	chr10:111422869:111423176:+	tag:tandem
Krr1:m4302:t:1	u:8747	chr10:111421737:111422868:+	u:8749	chr10:111423177:111425489:+	tag:tandem
Krr1:m4302:t:2	u:8748	chr10:111422869:111423176:+	u:8749	chr10:111423177:111425489:+	tag:tandem
Zfp330:m4302:t:0	u:73926	chr8:85287862:85288127:-	u:73925	chr8:85287519:85287861:-	tag:tandem
Chmp4b:m4302:t:0	u:46973	chr2:154519744:154520000:+	u:46974	chr2:154520001:154520518:+	tag:tandem
Odf2:m4302:t:0	u:44613	chr2:29786181:29786805:+	u:44614	chr2:29786806:29787265:+	tag:tandem
2310044H10Rik:m4302:t:0	u:67866	chr7:51745730:51745938:-	u:67865	chr7:51745494:51745729:-	tag:tandem
Zranb2:m4302:t:0	u:51659	chr3:157209888:157210963:+	u:51660	chr3:157210964:157211354:+	tag:tandem
Crnkl1:m4302:t:0	u:43038	chr2:145743698:145743989:-	u:43037	chr2:145743210:145743697:-	tag:tandem
Med16;AK181029:m4302:t:0	u:5994	chr10:79357911:79358055:-	u:5993	chr10:79357614:79357910:-	tag:tandem
Mrpl3:m4302:t:0	u:81330	chr9:104979475:104979695:+	u:81331	chr9:104979696:104979805:+	tag:tandem
Mrpl3:m4302:t:1	u:81330	chr9:104979475:104979695:+	u:81332	chr9:104979806:104982227:+	tag:tandem
Mrpl3:m4302:t:2	u:81331	chr9:104979696:104979805:+	u:81332	chr9:104979806:104982227:+	tag:tandem
Mrpl1:m4302:a:0	u:60674	chr5:96668003:96668702:+	u:60677	chr5:96694946:96695734:+	tag:alter
Etf1:m4302:t:0	u:35940	chr18:35063771:35064127:-	u:35939	chr18:35062439:35063770:-	tag:tandem
Etf1:m4302:t:1	u:35941	chr18:35064128:35064641:-	u:35939	chr18:35062439:35063770:-	tag:tandem
Etf1:m4302:t:2	u:35941	chr18:35064128:35064641:-	u:35940	chr18:35063771:35064127:-	tag:tandem
2610507B11Rik:m4302:t:0	u:13581	chr11:78103485:78103714:+	u:13583	chr11:78103825:78104130:+	tag:tandem
Wwox:m4302:a:0	u:76914	chr8:116974424:116977723:+	u:76915	chr8:117875726:117876611:+	tag:alter
Gins3:m4302:t:0	u:76524	chr8:98167237:98168412:+	u:76525	chr8:98168413:98168907:+	tag:tandem
Adprh:m4302:t:0	u:29582	chr16:38445600:38445769:-	u:29578	chr16:38444253:38445015:-	tag:tandem
Kdm6a:m4302:a:0	u:83618	chrX:17835106:17836093:+	u:83620	chrX:17855781:17856483:+	tag:alter
mKIAA2030;Ubn2:m4302:t:0	u:64824	chr6:38452287:38452552:+	u:64825	chr6:38452553:38457533:+	tag:tandem
mKIAA2030;Ubn2:m4302:t:1	u:64824	chr6:38452287:38452552:+	u:64827	chr6:38457939:38462762:+	tag:tandem
mKIAA2030;Ubn2:m4302:t:2	u:64825	chr6:38452553:38457533:+	u:64827	chr6:38457939:38462762:+	tag:tandem
Kdm6b:m4302:a:0	u:10224	chr11:69216684:69217044:-	u:10222	chr11:69212353:69213327:-	tag:alter
Fem1c:m4302:t:0	u:36105	chr18:46663476:46664256:-	u:36103	chr18:46661400:46662234:-	tag:tandem
Fem1a:m4302:t:0	u:35156	chr17:56398296:56399216:+	u:35160	chr17:56400100:56400975:+	tag:tandem
Nus1:m4302:t:0	u:7487	chr10:52156572:52157812:+	u:7489	chr10:52157873:52159012:+	tag:tandem
Nus1:m4302:t:1	u:7487	chr10:52156572:52157812:+	u:7490	chr10:52159013:52159997:+	tag:tandem
Nus1:m4302:t:2	u:7489	chr10:52157873:52159012:+	u:7490	chr10:52159013:52159997:+	tag:tandem
Med8:m4302:t:0	u:55622	chr4:118087393:118087661:+	u:55624	chr4:118087714:118088386:+	tag:tandem
Pa2g4:m4302:t:0	u:6900	chr10:127995692:127995961:-	u:6899	chr10:127994821:127995691:-	tag:tandem
Prpf4:m4302:t:0	u:54901	chr4:62084445:62084933:+	u:54905	chr4:62085648:62088027:+	tag:tandem
Prpf6:m4302:a:0	u:47706	chr2:181375485:181376119:+	u:47707	chr2:181390279:181390365:+	tag:alter
mKIAA1673:m4302:t:0	u:12454	chr11:31832078:31834947:+	u:12456	chr11:31835059:31835633:+	tag:tandem
Mical2:m4302:t:0	u:72218	chr7:119495237:119497488:+	u:72219	chr7:119497489:119498707:+	tag:tandem
Acox1:m4302:t:0	u:11746	chr11:116033963:116034466:-	u:11744	chr11:116033202:116033864:-	tag:tandem
Sdhaf1:m4302:t:0	u:67542	chr7:31106633:31106991:-	u:67541	chr7:31106428:31106632:-	tag:tandem
Zscan22:m4302:t:0	u:70362	chr7:13492670:13493590:+	u:70363	chr7:13493591:13494292:+	tag:tandem
Tmco3:m4302:a:0	u:75109	chr8:13296171:13297616:+	u:75110	chr8:13320874:13321394:+	tag:alter
Tmco6:m4302:a:0	u:37258	chr18:36899069:36899498:+	u:37259	chr18:36901817:36902050:+	tag:alter
Zmat2:m4302:t:0	u:37268	chr18:36957676:36957948:+	u:37270	chr18:36958017:36958319:+	tag:tandem
Zmat2:m4302:t:1	u:37268	chr18:36957676:36957948:+	u:37272	chr18:36958518:36958913:+	tag:tandem
Zmat2:m4302:t:2	u:37268	chr18:36957676:36957948:+	u:37273	chr18:36958914:36959319:+	tag:tandem
Zmat2:m4302:t:3	u:37270	chr18:36958017:36958319:+	u:37272	chr18:36958518:36958913:+	tag:tandem
Zmat2:m4302:t:4	u:37270	chr18:36958017:36958319:+	u:37273	chr18:36958914:36959319:+	tag:tandem
Zmat2:m4302:t:5	u:37272	chr18:36958518:36958913:+	u:37273	chr18:36958914:36959319:+	tag:tandem
Pom121:m4302:t:0	u:58946	chr5:135852430:135852637:-	u:58945	chr5:135852010:135852429:-	tag:tandem
Rnf168:m4302:t:0	u:30806	chr16:32299412:32300738:+	u:30807	chr16:32300739:32301007:+	tag:tandem
Mlf1ip:m4302:t:0	u:75573	chr8:47663722:47663987:+	u:75575	chr8:47664073:47664937:+	tag:tandem
Zfp235:m4302:a:0	u:70558	chr7:24921004:24921930:+	u:70559	chr7:24927285:24928262:+	tag:alter
Zfp236:m4302:t:0	u:36716	chr18:82764853:82765173:-	u:36715	chr18:82762989:82764852:-	tag:tandem
Zfp236:m4302:t:1	u:36717	chr18:82765174:82765627:-	u:36715	chr18:82762989:82764852:-	tag:tandem
Zfp236:m4302:t:2	u:36717	chr18:82765174:82765627:-	u:36716	chr18:82764853:82765173:-	tag:tandem
Oraov1:m4302:t:0	u:72880	chr7:152105648:152107041:+	u:72881	chr7:152107042:152108149:+	tag:tandem
Hif1an:m4302:t:0	u:40455	chr19:44646160:44647152:+	u:40456	chr19:44647153:44647419:+	tag:tandem
Hif1an:m4302:t:1	u:40455	chr19:44646160:44647152:+	u:40458	chr19:44648512:44650763:+	tag:tandem
Hif1an:m4302:t:2	u:40456	chr19:44647153:44647419:+	u:40458	chr19:44648512:44650763:+	tag:tandem
Slc16a10:m4302:t:0	u:5343	chr10:39756268:39756775:-	u:5341	chr10:39753341:39756046:-	tag:tandem
Slc16a10:m4302:a:0	u:5346	chr10:39795565:39796339:-	u:5341	chr10:39753341:39756046:-	tag:alter
Slc16a10:m4302:a:1	u:5346	chr10:39795565:39796339:-	u:5343	chr10:39756268:39756775:-	tag:alter
Hipk1:m4302:t:0	u:48811	chr3:103547591:103547870:-	u:48808	chr3:103544079:103546903:-	tag:tandem
Pcnx:m4302:t:0	u:18140	chr12:83097475:83097744:+	u:18141	chr12:83097745:83098108:+	tag:tandem
Pcnx:m4302:t:1	u:18140	chr12:83097475:83097744:+	u:18142	chr12:83098109:83101910:+	tag:tandem
Pcnx:m4302:t:2	u:18141	chr12:83097745:83098108:+	u:18142	chr12:83098109:83101910:+	tag:tandem
Polk;Dinb1:m4302:a:0	u:20430	chr13:97253446:97254360:-	u:20428	chr13:97250644:97252209:-	tag:alter
AF217545:m4302:t:0	u:64698	chr6:30754783:30757551:+	u:64699	chr6:30757552:30758347:+	tag:tandem
AF217545:m4302:t:1	u:64698	chr6:30754783:30757551:+	u:64700	chr6:30758348:30758838:+	tag:tandem
AF217545:m4302:t:2	u:64699	chr6:30757552:30758347:+	u:64700	chr6:30758348:30758838:+	tag:tandem
Ankib1;mKIAA1386:m4302:t:0	u:56783	chr5:3690418:3691272:-	u:56780	chr5:3690000:3690143:-	tag:tandem
Ankib1;mKIAA1386:m4302:a:0	u:56801	chr5:3733680:3734184:-	u:56780	chr5:3690000:3690143:-	tag:alter
Ankib1;mKIAA1386:m4302:a:1	u:56801	chr5:3733680:3734184:-	u:56783	chr5:3690418:3691272:-	tag:alter
Dnajc28:m4302:t:0	u:29983	chr16:91615943:91616424:-	u:29982	chr16:91614498:91615942:-	tag:tandem
Mtmr4:m4302:t:0	u:13896	chr11:87427755:87428680:+	u:13897	chr11:87428681:87429803:+	tag:tandem
Mtmr1:m4302:t:0	u:83983	chrX:68669902:68671129:+	u:83984	chrX:68671130:68671848:+	tag:tandem
Abcb10:m4302:t:0	u:74865	chr8:126477010:126478207:-	u:74864	chr8:126476359:126477009:-	tag:tandem
Carf:m4302:t:0	u:3077	chr1:60207424:60207877:+	u:3078	chr1:60207878:60210792:+	tag:tandem
Car3:m4302:a:0	u:49638	chr3:14865047:14865549:+	u:49639	chr3:14871661:14871938:+	tag:alter
Car3:m4302:a:1	u:49638	chr3:14865047:14865549:+	u:49640	chr3:14871939:14872187:+	tag:alter
Car3:m4302:a:2	u:49638	chr3:14865047:14865549:+	u:49643	chr3:14872373:14872536:+	tag:alter
Car3:m4302:t:0	u:49639	chr3:14871661:14871938:+	u:49640	chr3:14871939:14872187:+	tag:tandem
Car3:m4302:t:1	u:49639	chr3:14871661:14871938:+	u:49643	chr3:14872373:14872536:+	tag:tandem
Car3:m4302:t:2	u:49640	chr3:14871939:14872187:+	u:49643	chr3:14872373:14872536:+	tag:tandem
Fgfr1op2:m4302:t:0	u:66744	chr6:146545954:146546278:+	u:66745	chr6:146546279:146547443:+	tag:tandem
Fgfr1op2:m4302:t:1	u:66744	chr6:146545954:146546278:+	u:66746	chr6:146547444:146547661:+	tag:tandem
Fgfr1op2:m4302:t:2	u:66745	chr6:146546279:146547443:+	u:66746	chr6:146547444:146547661:+	tag:tandem
Dpy19l3:m4302:t:0	u:67780	chr7:36474601:36475330:-	u:67779	chr7:36470519:36474600:-	tag:tandem
Dpy19l3:m4302:t:1	u:67781	chr7:36475331:36475799:-	u:67779	chr7:36470519:36474600:-	tag:tandem
Dpy19l3:m4302:t:2	u:67781	chr7:36475331:36475799:-	u:67780	chr7:36474601:36475330:-	tag:tandem
Ccdc47:m4302:t:0	u:11426	chr11:106060867:106061796:-	u:11425	chr11:106060670:106060866:-	tag:tandem
Ccdc47:m4302:t:1	u:11427	chr11:106061797:106061971:-	u:11425	chr11:106060670:106060866:-	tag:tandem
Ccdc47:m4302:t:2	u:11428	chr11:106061972:106062249:-	u:11425	chr11:106060670:106060866:-	tag:tandem
Ccdc47:m4302:t:3	u:11427	chr11:106061797:106061971:-	u:11426	chr11:106060867:106061796:-	tag:tandem
Ccdc47:m4302:t:4	u:11428	chr11:106061972:106062249:-	u:11426	chr11:106060867:106061796:-	tag:tandem
Ccdc47:m4302:t:5	u:11428	chr11:106061972:106062249:-	u:11427	chr11:106061797:106061971:-	tag:tandem
Mbp:m4302:t:0	u:37970	chr18:82724160:82724759:+	u:37971	chr18:82724760:82728094:+	tag:tandem
TCR-beta chain:m4302:a:0	u:64936	chr6:41497770:41497879:+	u:64937	chr6:41498159:41498357:+	tag:alter
mKIAA1306;Caskin1:m4302:a:0	u:34073	chr17:24636447:24637221:+	u:34085	chr17:24644753:24645614:+	tag:alter
Fam178a:m4302:a:0	u:40459	chr19:45005608:45006543:+	u:40480	chr19:45056868:45057516:+	tag:alter
Fam178a:m4302:a:1	u:40459	chr19:45005608:45006543:+	u:40481	chr19:45057517:45057770:+	tag:alter
Fam178a:m4302:t:0	u:40480	chr19:45056868:45057516:+	u:40481	chr19:45057517:45057770:+	tag:tandem
Arfip1:m4302:t:0	u:48337	chr3:84300341:84301657:-	u:48335	chr3:84299973:84300175:-	tag:tandem
Arfip2:m4302:t:0	u:69181	chr7:112784135:112784657:-	u:69180	chr7:112782715:112784134:-	tag:tandem
Os9:m4302:t:0	u:6823	chr10:126532842:126533302:-	u:6822	chr10:126532706:126532841:-	tag:tandem
Hyou1:m4302:a:0	u:80158	chr9:44193672:44194152:+	u:80159	chr9:44199133:44200451:+	tag:alter
D19Ertd386e:m4302:t:0	u:40416	chr19:42665162:42665859:+	u:40417	chr19:42665860:42666745:+	tag:tandem
Snap23:m4302:t:0	u:46152	chr2:120425077:120426026:+	u:46156	chr2:120426458:120427000:+	tag:tandem
Snap29:m4302:t:0	u:30425	chr16:17428504:17429422:+	u:30426	chr16:17429423:17430918:+	tag:tandem
AI848100:m4302:t:0	u:1782	chr1:163746976:163748496:-	u:1781	chr1:163746241:163746975:-	tag:tandem
Dpf2:m4302:t:0	u:38267	chr19:5897738:5898631:-	u:38266	chr19:5897385:5897737:-	tag:tandem
Dpf2:m4302:a:0	u:38268	chr19:5899324:5901298:-	u:38266	chr19:5897385:5897737:-	tag:alter
Dpf2:m4302:a:1	u:38268	chr19:5899324:5901298:-	u:38267	chr19:5897738:5898631:-	tag:alter
Dpf3:m4302:a:0	u:15896	chr12:84370185:84370411:-	u:15895	chr12:84314738:84316727:-	tag:alter
Dpf1:m4302:t:0	u:70767	chr7:30101570:30101946:+	u:70768	chr7:30101947:30102604:+	tag:tandem
Egln3:m4302:t:0	u:15520	chr12:55280626:55281249:-	u:15519	chr12:55279968:55280625:-	tag:tandem
Egln1:m4302:t:0	u:74887	chr8:127434110:127434607:-	u:74886	chr8:127432487:127434109:-	tag:tandem
Gcet2:m4302:t:0	u:31084	chr16:45620254:45621347:+	u:31085	chr16:45621348:45622979:+	tag:tandem
Helb;helB:m4302:t:0	u:6743	chr10:119520768:119521867:-	u:6742	chr10:119520664:119520767:-	tag:tandem
Dhx36:m4302:t:0	u:48168	chr3:62274001:62274483:-	u:48166	chr3:62271937:62272563:-	tag:tandem
Cops2:m4302:t:0	u:42712	chr2:125657457:125657928:-	u:42710	chr2:125656143:125657335:-	tag:tandem
Cops6:m4302:t:0	u:61822	chr5:138604736:138605214:+	u:61825	chr5:138605521:138605874:+	tag:tandem
Ep400:m4302:t:0	u:58172	chr5:111093792:111094820:-	u:58171	chr5:111093351:111093791:-	tag:tandem
Rps6kb1:m4302:t:0	u:10787	chr11:86313823:86315532:-	u:10786	chr11:86312513:86313822:-	tag:tandem
Rps6kb1:m4302:a:0	u:10790	chr11:86327485:86329693:-	u:10786	chr11:86312513:86313822:-	tag:alter
Rps6kb1:m4302:a:1	u:10790	chr11:86327485:86329693:-	u:10787	chr11:86313823:86315532:-	tag:alter
Cald1:m4302:t:0	u:64763	chr6:34723228:34723717:+	u:64764	chr6:34723718:34725468:+	tag:tandem
0610007P14Rik:m4302:t:0	u:16018	chr12:87156846:87157063:-	u:16017	chr12:87156398:87156845:-	tag:tandem
Solh:m4302:t:0	u:32108	chr17:26096501:26096674:-	u:32106	chr17:26095311:26096130:-	tag:tandem
Tnfsf10:m4302:t:0	u:49731	chr3:27234589:27234893:+	u:49733	chr3:27235019:27238586:+	tag:tandem
Psg19:m4302:t:0	u:67123	chr7:19375143:19375399:-	u:67122	chr7:19374474:19375142:-	tag:tandem
Csf1:m4302:t:0	u:48916	chr3:107544629:107546063:-	u:48915	chr3:107544237:107544628:-	tag:tandem
Csf1:m4302:a:0	u:48917	chr3:107548513:107548758:-	u:48915	chr3:107544237:107544628:-	tag:alter
Csf1:m4302:a:1	u:48917	chr3:107548513:107548758:-	u:48916	chr3:107544629:107546063:-	tag:alter
Dclre1b:m4302:a:0	u:48816	chr3:103608172:103611212:-	u:48813	chr3:103604524:103606519:-	tag:alter
Dclre1c:m4302:t:0	u:44066	chr2:3376226:3376890:+	u:44067	chr2:3376891:3378388:+	tag:tandem
Adap2:m4302:t:0	u:13659	chr11:79990814:79992328:+	u:13661	chr11:79992426:79993590:+	tag:tandem
Aak1:m4302:t:0	u:65655	chr6:86937292:86938040:+	u:65656	chr6:86938041:86941857:+	tag:tandem
Aak1:m4302:t:1	u:65655	chr6:86937292:86938040:+	u:65657	chr6:86941858:86953221:+	tag:tandem
Aak1:m4302:t:2	u:65656	chr6:86938041:86941857:+	u:65657	chr6:86941858:86953221:+	tag:tandem
Asap1:m4302:t:0	u:26260	chr15:63920101:63921008:-	u:26258	chr15:63918419:63919734:-	tag:tandem
Usf2:m4302:t:0	u:67659	chr7:31731015:31731598:-	u:67658	chr7:31730267:31731014:-	tag:tandem
Ado:m4302:t:0	u:5724	chr10:67007879:67008729:-	u:5723	chr10:67007259:67007878:-	tag:tandem
Kcnmb1:m4302:t:0	u:12501	chr11:33870364:33870758:+	u:12502	chr11:33870759:33871276:+	tag:tandem
Kcnmb1:m4302:t:1	u:12501	chr11:33870364:33870758:+	u:12503	chr11:33871277:33873637:+	tag:tandem
Kcnmb1:m4302:t:2	u:12502	chr11:33870759:33871276:+	u:12503	chr11:33871277:33873637:+	tag:tandem
Cacna2d1:m4302:a:0	u:59594	chr5:15531806:15535809:+	u:59596	chr5:15876492:15877956:+	tag:alter
Cacna2d1:m4302:a:1	u:59594	chr5:15531806:15535809:+	u:59597	chr5:15877957:15880328:+	tag:alter
Cacna2d1:m4302:t:0	u:59596	chr5:15876492:15877956:+	u:59597	chr5:15877957:15880328:+	tag:tandem
Aagab:m4302:t:0	u:80592	chr9:63488091:63489636:+	u:80594	chr9:63489701:63492393:+	tag:tandem
Oxct1:m4302:t:0	u:27341	chr15:4103769:4103986:+	u:27345	chr15:4104475:4105343:+	tag:tandem
Cdc27:m4302:t:0	u:11398	chr11:104365466:104365696:-	u:11397	chr11:104364060:104365465:-	tag:tandem
Cdc27:m4302:t:1	u:11399	chr11:104365697:104366911:-	u:11397	chr11:104364060:104365465:-	tag:tandem
Cdc27:m4302:a:0	u:11400	chr11:104381581:104382141:-	u:11397	chr11:104364060:104365465:-	tag:alter
Cdc27:m4302:t:2	u:11399	chr11:104365697:104366911:-	u:11398	chr11:104365466:104365696:-	tag:tandem
Cdc27:m4302:a:1	u:11400	chr11:104381581:104382141:-	u:11398	chr11:104365466:104365696:-	tag:alter
Cdc27:m4302:a:2	u:11400	chr11:104381581:104382141:-	u:11399	chr11:104365697:104366911:-	tag:alter
Cdc26:m4302:t:0	u:52477	chr4:62055567:62056055:-	u:52476	chr4:62054845:62055566:-	tag:tandem
Nol11:m4302:t:0	u:11477	chr11:107028470:107029490:-	u:11475	chr11:107027975:107028240:-	tag:tandem
Nol12:m4302:t:0	u:28212	chr15:78771058:78771294:+	u:28214	chr15:78771867:78772339:+	tag:tandem
Morn1:m4302:a:0	u:56656	chr4:154485757:154486289:+	u:56662	chr4:154519418:154519615:+	tag:alter
Otud5:m4302:a:0	u:83518	chrX:7451358:7452015:+	u:83522	chrX:7453140:7453746:+	tag:alter
Stk39:m4302:a:0	u:41825	chr2:68100848:68101211:-	u:41824	chr2:68048831:68049975:-	tag:alter
mKIAA1217;Etl4:m4302:t:0	u:44300	chr2:20731235:20731746:+	u:44301	chr2:20731747:20732161:+	tag:tandem
Gphn:m4302:t:0	u:18066	chr12:79784898:79785082:+	u:18067	chr12:79785083:79785760:+	tag:tandem
Fam76b:m4302:t:0	u:79748	chr9:13648705:13649734:+	u:79749	chr9:13649735:13650965:+	tag:tandem
Vps36:m4302:t:0	u:75230	chr8:23329147:23329769:+	u:75231	chr8:23329770:23331236:+	tag:tandem
Znf593;Zfp593:m4302:t:0	u:53565	chr4:133800565:133800875:-	u:53564	chr4:133799221:133800564:-	tag:tandem
AK086477;Sh3glb1:m4302:t:0	u:49389	chr3:144351808:144353306:-	u:49388	chr3:144349876:144351807:-	tag:tandem
Eif4e2:m4302:a:0	u:3463	chr1:89124448:89124636:+	u:3468	chr1:89135318:89136825:+	tag:alter
Akirin2:m4302:t:0	u:54459	chr4:34513474:34513819:+	u:54460	chr4:34513820:34514156:+	tag:tandem
Slc31a1:m4302:t:0	u:54899	chr4:62050041:62050560:+	u:54900	chr4:62050561:62052802:+	tag:tandem
Camk2n1:m4302:t:0	u:56267	chr4:138013171:138013543:+	u:56270	chr4:138014058:138016040:+	tag:tandem
Ctbs:m4302:t:0	u:51566	chr3:146127054:146127230:+	u:51569	chr3:146128039:146128734:+	tag:tandem
1190002N15Rik:m4302:t:0	u:78924	chr9:94419321:94420733:-	u:78923	chr9:94418283:94419320:-	tag:tandem
Gsdma:m4302:t:0	u:14232	chr11:98537730:98537962:+	u:14233	chr11:98537963:98539021:+	tag:tandem
Azi2:m4302:t:0	u:81694	chr9:117971860:117972135:+	u:81695	chr9:117972136:117972695:+	tag:tandem
0610007L01Rik:m4302:t:0	u:61556	chr5:130717344:130718251:+	u:61558	chr5:130718448:130719535:+	tag:tandem
1810011O10Rik:m4302:t:0	u:73241	chr8:25548087:25549047:-	u:73240	chr8:25547646:25548086:-	tag:tandem
Rhobtb2:m4302:t:0	u:23420	chr14:70186996:70187321:-	u:23415	chr14:70184797:70186074:-	tag:tandem
Rhobtb1:m4302:t:0	u:7774	chr10:68752267:68752764:+	u:7775	chr10:68752765:68754531:+	tag:tandem
Tbck:m4302:t:0	u:51316	chr3:132501035:132501469:+	u:51320	chr3:132503657:132504339:+	tag:tandem
Tbce:m4302:a:0	u:19189	chr13:14110505:14111662:-	u:19180	chr13:14095307:14095963:-	tag:alter
Tbcc:m4302:t:0	u:35042	chr17:47028794:47029021:+	u:35043	chr17:47029022:47029411:+	tag:tandem
Tmem44:m4302:t:0	u:29423	chr16:30511941:30513776:-	u:29421	chr16:30510193:30511472:-	tag:tandem
Tmem44:m4302:t:1	u:29425	chr16:30514052:30514488:-	u:29421	chr16:30510193:30511472:-	tag:tandem
Tmem44:m4302:t:2	u:29426	chr16:30514489:30514800:-	u:29421	chr16:30510193:30511472:-	tag:tandem
Tmem44:m4302:t:3	u:29425	chr16:30514052:30514488:-	u:29423	chr16:30511941:30513776:-	tag:tandem
Tmem44:m4302:t:4	u:29426	chr16:30514489:30514800:-	u:29423	chr16:30511941:30513776:-	tag:tandem
Tmem44:m4302:t:5	u:29426	chr16:30514489:30514800:-	u:29425	chr16:30514052:30514488:-	tag:tandem
Tmem47:m4302:t:0	u:84102	chrX:78339996:78341171:+	u:84104	chrX:78341229:78342933:+	tag:tandem
Tmem47:m4302:t:1	u:84102	chrX:78339996:78341171:+	u:84105	chrX:78342934:78343213:+	tag:tandem
Tmem47:m4302:t:2	u:84104	chrX:78341229:78342933:+	u:84105	chrX:78342934:78343213:+	tag:tandem
Ska1;2810433K01Rik:m4302:t:0	u:36594	chr18:74355803:74356428:-	u:36593	chr18:74354953:74355802:-	tag:tandem
Cntn1:m4302:t:0	u:28529	chr15:92170020:92170243:+	u:28530	chr15:92170244:92171380:+	tag:tandem
Cntn1:m4302:t:1	u:28529	chr15:92170020:92170243:+	u:28531	chr15:92171381:92172192:+	tag:tandem
Cntn1:m4302:t:2	u:28530	chr15:92170244:92171380:+	u:28531	chr15:92171381:92172192:+	tag:tandem
Cntn4:m4302:a:0	u:65852	chr6:106623969:106624263:+	u:65853	chr6:106647615:106649303:+	tag:alter
Tspan2:m4302:t:0	u:50887	chr3:102572865:102575153:+	u:50890	chr3:102575575:102576159:+	tag:tandem
Tspan1:m4302:t:0	u:53061	chr4:115835212:115835592:-	u:53060	chr4:115834486:115835211:-	tag:tandem
Tspan9:m4302:t:0	u:64011	chr6:127913925:127914445:-	u:64009	chr6:127911404:127913877:-	tag:tandem
AK020517;AK053982:m4302:t:0	u:74560	chr8:113652966:113653686:-	u:74558	chr8:113651345:113652785:-	tag:tandem
Fam160b1;mKIAA1600:m4302:t:0	u:40752	chr19:57460960:57463788:+	u:40754	chr19:57463891:57464083:+	tag:tandem
Ubac2:m4302:t:0	u:25700	chr14:122419279:122419457:+	u:25701	chr14:122419458:122420256:+	tag:tandem
Pitpna:m4302:t:0	u:13460	chr11:75439618:75439792:+	u:13465	chr11:75440630:75442133:+	tag:tandem
AK031819;Vcpip1:m4302:t:0	u:65	chr1:9713371:9713517:-	u:63	chr1:9710620:9713250:-	tag:tandem
AK031819;Vcpip1:m4302:t:1	u:66	chr1:9713518:9714450:-	u:63	chr1:9710620:9713250:-	tag:tandem
AK031819;Vcpip1:m4302:t:2	u:66	chr1:9713518:9714450:-	u:65	chr1:9713371:9713517:-	tag:tandem
Zfp622:m4302:a:0	u:27564	chr15:25916851:25920218:+	u:27565	chr15:25927049:25927181:+	tag:alter
Zfp622:m4302:a:1	u:27564	chr15:25916851:25920218:+	u:27566	chr15:25927182:25928236:+	tag:alter
Zfp622:m4302:t:0	u:27565	chr15:25927049:25927181:+	u:27566	chr15:25927182:25928236:+	tag:tandem
Rem1;AK078772:m4302:t:0	u:46886	chr2:152460453:152460936:+	u:46887	chr2:152460937:152462304:+	tag:tandem
Mbtps2:m4302:t:0	u:83336	chrX:153986142:153987871:-	u:83335	chrX:153985754:153986141:-	tag:tandem
Sall1:m4302:t:0	u:74110	chr8:91551872:91552276:-	u:74109	chr8:91551137:91551871:-	tag:tandem
Rap2b:m4302:t:0	u:50166	chr3:61169530:61170898:+	u:50168	chr3:61170964:61172352:+	tag:tandem
Rap2c:m4302:t:0	u:82554	chrX:48358341:48359927:-	u:82551	chrX:48357462:48358120:-	tag:tandem
Gabpa:m4302:t:0	u:31285	chr16:84860995:84861556:+	u:31288	chr16:84863254:84863882:+	tag:tandem
Htatsf1:m4302:a:0	u:83904	chrX:54310082:54310382:+	u:83905	chrX:54320031:54320358:+	tag:alter
Pdx1:m4302:t:0	u:62043	chr5:148086401:148086724:+	u:62044	chr5:148086725:148087423:+	tag:tandem
Cyfip2:m4302:a:0	u:9749	chr11:46050085:46050401:-	u:9747	chr11:46007447:46009569:-	tag:alter
Cyfip2:m4302:a:1	u:9750	chr11:46050402:46052044:-	u:9747	chr11:46007447:46009569:-	tag:alter
Cyfip2:m4302:t:0	u:9750	chr11:46050402:46052044:-	u:9749	chr11:46050085:46050401:-	tag:tandem
Kctd20:m4302:t:0	u:34421	chr17:29103889:29104881:+	u:34423	chr17:29105709:29106493:+	tag:tandem
Smcr8:m4302:a:0	u:12951	chr11:60593887:60594568:+	u:12953	chr11:60597790:60601788:+	tag:alter
Mmp14:m4302:t:0	u:25061	chr14:55059509:55060146:+	u:25062	chr14:55060147:55061106:+	tag:tandem
Mmp15:m4302:t:0	u:76520	chr8:97896420:97897775:+	u:76521	chr8:97897776:97898192:+	tag:tandem
Mmp15:m4302:t:1	u:76520	chr8:97896420:97897775:+	u:76522	chr8:97898193:97898979:+	tag:tandem
Mmp15:m4302:t:2	u:76521	chr8:97897776:97898192:+	u:76522	chr8:97898193:97898979:+	tag:tandem
Mmp19:m4302:t:0	u:9077	chr10:128235625:128236280:+	u:9079	chr10:128236534:128237879:+	tag:tandem
Klrb1b:m4302:t:0	u:64056	chr6:128764402:128765312:-	u:64055	chr6:128763724:128764401:-	tag:tandem
Vangl1:m4302:t:0	u:48787	chr3:101960619:101962409:-	u:48786	chr3:101959823:101960618:-	tag:tandem
Kalrn:m4302:t:0	u:29505	chr16:33974075:33975601:-	u:29504	chr16:33969152:33974074:-	tag:tandem
Kalrn:m4302:a:0	u:29509	chr16:34152110:34152667:-	u:29504	chr16:33969152:33974074:-	tag:alter
Kalrn:m4302:a:1	u:29509	chr16:34152110:34152667:-	u:29505	chr16:33974075:33975601:-	tag:alter
Strbp:m4302:a:0	u:41546	chr2:37425388:37438675:-	u:41544	chr2:37338748:37339365:-	tag:alter
Strbp:m4302:a:1	u:41547	chr2:37438676:37438991:-	u:41544	chr2:37338748:37339365:-	tag:alter
Strbp:m4302:a:2	u:41548	chr2:37438992:37439173:-	u:41544	chr2:37338748:37339365:-	tag:alter
Strbp:m4302:a:3	u:41549	chr2:37439174:37439549:-	u:41544	chr2:37338748:37339365:-	tag:alter
Strbp:m4302:t:0	u:41547	chr2:37438676:37438991:-	u:41546	chr2:37425388:37438675:-	tag:tandem
Strbp:m4302:t:1	u:41548	chr2:37438992:37439173:-	u:41546	chr2:37425388:37438675:-	tag:tandem
Strbp:m4302:t:2	u:41549	chr2:37439174:37439549:-	u:41546	chr2:37425388:37438675:-	tag:tandem
Strbp:m4302:t:3	u:41548	chr2:37438992:37439173:-	u:41547	chr2:37438676:37438991:-	tag:tandem
Strbp:m4302:t:4	u:41549	chr2:37439174:37439549:-	u:41547	chr2:37438676:37438991:-	tag:tandem
Strbp:m4302:t:5	u:41549	chr2:37439174:37439549:-	u:41548	chr2:37438992:37439173:-	tag:tandem
1700052N19Rik:m4302:t:0	u:4992	chr10:5892972:5895659:-	u:4991	chr10:5891401:5892971:-	tag:tandem
1700052N19Rik:m4302:a:0	u:4996	chr10:5906568:5907049:-	u:4991	chr10:5891401:5892971:-	tag:alter
1700052N19Rik:m4302:a:1	u:4996	chr10:5906568:5907049:-	u:4992	chr10:5892972:5895659:-	tag:alter
AI597468:m4302:a:0	u:8355	chr10:84577152:84580333:+	u:8358	chr10:84582965:84583362:+	tag:alter
Snrnp35:m4302:t:0	u:61422	chr5:124940869:124941133:+	u:61424	chr5:124941333:124943591:+	tag:tandem
Cd276:m4302:t:0	u:78296	chr9:58372443:58374145:-	u:78295	chr9:58372106:58372442:-	tag:tandem
Fignl1:m4302:a:0	u:9360	chr11:11700379:11701004:-	u:9358	chr11:11687432:11689100:-	tag:alter
AK171902;Deptor:m4302:t:0	u:27720	chr15:55083690:55085756:+	u:27721	chr15:55085757:55087483:+	tag:tandem
AK171902;Deptor:m4302:t:1	u:27720	chr15:55083690:55085756:+	u:27722	chr15:55087484:55090827:+	tag:tandem
AK171902;Deptor:m4302:t:2	u:27721	chr15:55085757:55087483:+	u:27722	chr15:55087484:55090827:+	tag:tandem
Ufm1:m4302:t:0	u:48101	chr3:53659134:53660036:-	u:48100	chr3:53657297:53659133:-	tag:tandem
Ufm1:m4302:t:1	u:48104	chr3:53660512:53661172:-	u:48100	chr3:53657297:53659133:-	tag:tandem
Ufm1:m4302:t:2	u:48107	chr3:53661427:53661782:-	u:48100	chr3:53657297:53659133:-	tag:tandem
Ufm1:m4302:t:3	u:48104	chr3:53660512:53661172:-	u:48101	chr3:53659134:53660036:-	tag:tandem
Ufm1:m4302:t:4	u:48107	chr3:53661427:53661782:-	u:48101	chr3:53659134:53660036:-	tag:tandem
Ufm1:m4302:t:5	u:48107	chr3:53661427:53661782:-	u:48104	chr3:53660512:53661172:-	tag:tandem
Fbn1:m4302:t:0	u:42675	chr2:125126677:125127321:-	u:42674	chr2:125126423:125126676:-	tag:tandem
Fbn1:m4302:a:0	u:42677	chr2:125290305:125292318:-	u:42674	chr2:125126423:125126676:-	tag:alter
Fbn1:m4302:a:1	u:42677	chr2:125290305:125292318:-	u:42675	chr2:125126677:125127321:-	tag:alter
Wnt5a:m4302:t:0	u:24395	chr14:29336126:29338619:+	u:24397	chr14:29338687:29340632:+	tag:tandem
Crat:m4302:t:0	u:41346	chr2:30257458:30258097:-	u:41344	chr2:30256050:30256622:-	tag:tandem
Pcdh7:m4302:a:0	u:60240	chr5:58119388:58120703:+	u:60242	chr5:58521035:58523478:+	tag:alter
Pcdh7:m4302:a:1	u:60240	chr5:58119388:58120703:+	u:60243	chr5:58523479:58524465:+	tag:alter
Pcdh7:m4302:t:0	u:60242	chr5:58521035:58523478:+	u:60243	chr5:58523479:58524465:+	tag:tandem
Maml1:m4302:t:0	u:9793	chr11:50069388:50072303:-	u:9792	chr11:50069132:50069387:-	tag:tandem
Qk:m4302:t:0	u:31682	chr17:10399745:10400248:-	u:31681	chr17:10399417:10399744:-	tag:tandem
Qk:m4302:t:1	u:31684	chr17:10401458:10402496:-	u:31681	chr17:10399417:10399744:-	tag:tandem
Qk:m4302:a:0	u:31685	chr17:10403044:10408295:-	u:31681	chr17:10399417:10399744:-	tag:alter
Qk:m4302:t:2	u:31684	chr17:10401458:10402496:-	u:31682	chr17:10399745:10400248:-	tag:tandem
Qk:m4302:a:1	u:31685	chr17:10403044:10408295:-	u:31682	chr17:10399745:10400248:-	tag:alter
Qk:m4302:a:2	u:31685	chr17:10403044:10408295:-	u:31684	chr17:10401458:10402496:-	tag:alter
Ppp2r5e:m4302:t:0	u:15762	chr12:76553477:76554533:-	u:15760	chr12:76551001:76551867:-	tag:tandem
Ppp2r5c:m4302:a:0	u:18843	chr12:111809291:111809899:+	u:18845	chr12:111818610:111820842:+	tag:alter
Ppp2r5c:m4302:a:1	u:18843	chr12:111809291:111809899:+	u:18846	chr12:111820843:111820976:+	tag:alter
Ppp2r5c:m4302:t:0	u:18845	chr12:111818610:111820842:+	u:18846	chr12:111820843:111820976:+	tag:tandem
Atpaf1:m4302:t:0	u:55556	chr4:115483801:115484438:+	u:55560	chr4:115484918:115486914:+	tag:tandem
9330159F19Rik:m4302:t:0	u:7249	chr10:28947701:28947786:+	u:7250	chr10:28947787:28950314:+	tag:tandem
Ghitm:m4302:t:0	u:22777	chr14:37935131:37935327:-	u:22775	chr14:37934344:37935001:-	tag:tandem
Tspyl1:m4302:t:0	u:7268	chr10:34003226:34003486:+	u:7269	chr10:34003487:34004637:+	tag:tandem
Saal1:m4302:a:0	u:68113	chr7:53947186:53947933:-	u:68108	chr7:53943263:53944136:-	tag:alter
Saal1:m4302:a:1	u:68114	chr7:53947934:53948345:-	u:68108	chr7:53943263:53944136:-	tag:alter
Saal1:m4302:t:0	u:68114	chr7:53947934:53948345:-	u:68113	chr7:53947186:53947933:-	tag:tandem
Papola:m4302:a:0	u:18677	chr12:107049246:107049621:+	u:18679	chr12:107051407:107052106:+	tag:alter
Papola:m4302:a:1	u:18677	chr12:107049246:107049621:+	u:18690	chr12:107073103:107074450:+	tag:alter
Papola:m4302:a:2	u:18679	chr12:107051407:107052106:+	u:18690	chr12:107073103:107074450:+	tag:alter
A630052C17Rik:m4302:t:0	u:9558	chr11:29071331:29072708:-	u:9557	chr11:29070913:29071330:-	tag:tandem
Wwp1:m4302:t:0	u:51849	chr4:19537850:19538514:-	u:51843	chr4:19535632:19536082:-	tag:tandem
Wwp1:m4302:t:1	u:51851	chr4:19538587:19538860:-	u:51843	chr4:19535632:19536082:-	tag:tandem
Wwp1:m4302:t:2	u:51851	chr4:19538587:19538860:-	u:51849	chr4:19537850:19538514:-	tag:tandem
Usp22:m4302:t:0	u:10062	chr11:60966394:60967972:-	u:10061	chr11:60965432:60966393:-	tag:tandem
Usp20:m4302:t:0	u:44675	chr2:30877245:30878174:+	u:44676	chr2:30878175:30879120:+	tag:tandem
Stom:m4302:t:0	u:41513	chr2:35170360:35171380:-	u:41512	chr2:35169506:35170359:-	tag:tandem
Parm1:m4302:t:0	u:60621	chr5:92052139:92053021:+	u:60622	chr5:92053022:92055767:+	tag:tandem
Ednra:m4302:a:0	u:73883	chr8:80193593:80195340:-	u:73882	chr8:80186927:80188874:-	tag:alter
Nfix:m4302:t:0	u:74012	chr8:87229860:87231299:-	u:74011	chr8:87228613:87229859:-	tag:tandem
Nfix:m4302:t:1	u:74014	chr8:87231484:87232085:-	u:74011	chr8:87228613:87229859:-	tag:tandem
Nfix:m4302:t:2	u:74015	chr8:87232086:87232576:-	u:74011	chr8:87228613:87229859:-	tag:tandem
Nfix:m4302:t:3	u:74014	chr8:87231484:87232085:-	u:74012	chr8:87229860:87231299:-	tag:tandem
Nfix:m4302:t:4	u:74015	chr8:87232086:87232576:-	u:74012	chr8:87229860:87231299:-	tag:tandem
Nfix:m4302:t:5	u:74015	chr8:87232086:87232576:-	u:74014	chr8:87231484:87232085:-	tag:tandem
Slc9a8;NHE8:m4302:t:0	u:47343	chr2:167299790:167300138:+	u:47345	chr2:167300346:167302498:+	tag:tandem
Bcap31:m4302:t:0	u:82746	chrX:70931719:70931895:-	u:82745	chrX:70931513:70931718:-	tag:tandem
Camk2d:m4302:t:0	u:51214	chr3:126546747:126547648:+	u:51215	chr3:126547649:126547829:+	tag:tandem
Camk2d:m4302:t:1	u:51214	chr3:126546747:126547648:+	u:51217	chr3:126547972:126549242:+	tag:tandem
Camk2d:m4302:t:2	u:51215	chr3:126547649:126547829:+	u:51217	chr3:126547972:126549242:+	tag:tandem
Camk2g:m4302:t:0	u:22519	chr14:21554961:21556074:-	u:22518	chr14:21554097:21554960:-	tag:tandem
Camk2a:m4302:t:0	u:37594	chr18:61144434:61145429:+	u:37595	chr18:61145430:61147651:+	tag:tandem
Ubxn4:m4302:t:0	u:3856	chr1:130173672:130174170:+	u:3857	chr1:130174171:130175953:+	tag:tandem
Ubxn7:m4302:t:0	u:30811	chr16:32385516:32386459:+	u:30812	chr16:32386460:32386848:+	tag:tandem
Ubxn7:m4302:t:1	u:30811	chr16:32385516:32386459:+	u:30814	chr16:32387982:32393832:+	tag:tandem
Ubxn7:m4302:t:2	u:30812	chr16:32386460:32386848:+	u:30814	chr16:32387982:32393832:+	tag:tandem
Xkr8:m4302:t:0	u:53515	chr4:132283213:132283769:-	u:53514	chr4:132280816:132283212:-	tag:tandem
Gusb:m4302:a:0	u:58856	chr5:130475469:130475900:-	u:58854	chr5:130464891:130465387:-	tag:alter
Rtn4rl1:m4302:t:0	u:13433	chr11:75079583:75080401:+	u:13434	chr11:75080402:75081268:+	tag:tandem
Fbxw2:m4302:a:0	u:41486	chr2:34666681:34667352:-	u:41484	chr2:34660912:34661501:-	tag:alter
Fbxw2:m4302:a:1	u:41487	chr2:34667353:34667957:-	u:41484	chr2:34660912:34661501:-	tag:alter
Fbxw2:m4302:a:2	u:41489	chr2:34680783:34681300:-	u:41484	chr2:34660912:34661501:-	tag:alter
Fbxw2:m4302:t:0	u:41487	chr2:34667353:34667957:-	u:41486	chr2:34666681:34667352:-	tag:tandem
Fbxw2:m4302:a:3	u:41489	chr2:34680783:34681300:-	u:41486	chr2:34666681:34667352:-	tag:alter
Fbxw2:m4302:a:4	u:41489	chr2:34680783:34681300:-	u:41487	chr2:34667353:34667957:-	tag:alter
Pard6g:m4302:t:0	u:37953	chr18:80314561:80314950:+	u:37954	chr18:80314951:80315848:+	tag:tandem
Col4a5:m4302:t:0	u:84486	chrX:138122667:138123130:+	u:84487	chrX:138123131:138123731:+	tag:tandem
Col4a4:m4302:t:0	u:815	chr1:82445304:82447297:-	u:814	chr1:82445165:82445303:-	tag:tandem
Col4a4:m4302:t:1	u:816	chr1:82447298:82448494:-	u:814	chr1:82445165:82445303:-	tag:tandem
Col4a4:m4302:t:2	u:817	chr1:82448495:82449335:-	u:814	chr1:82445165:82445303:-	tag:tandem
Col4a4:m4302:t:3	u:819	chr1:82449424:82449705:-	u:814	chr1:82445165:82445303:-	tag:tandem
Col4a4:m4302:t:4	u:816	chr1:82447298:82448494:-	u:815	chr1:82445304:82447297:-	tag:tandem
Col4a4:m4302:t:5	u:817	chr1:82448495:82449335:-	u:815	chr1:82445304:82447297:-	tag:tandem
Col4a4:m4302:t:6	u:819	chr1:82449424:82449705:-	u:815	chr1:82445304:82447297:-	tag:tandem
Col4a4:m4302:t:7	u:817	chr1:82448495:82449335:-	u:816	chr1:82447298:82448494:-	tag:tandem
Col4a4:m4302:t:8	u:819	chr1:82449424:82449705:-	u:816	chr1:82447298:82448494:-	tag:tandem
Col4a4:m4302:t:9	u:819	chr1:82449424:82449705:-	u:817	chr1:82448495:82449335:-	tag:tandem
Col4a1:m4302:t:0	u:72975	chr8:11199052:11199142:-	u:72974	chr8:11198597:11199051:-	tag:tandem
Col4a1:m4302:t:1	u:72978	chr8:11199631:11199882:-	u:72974	chr8:11198597:11199051:-	tag:tandem
Col4a1:m4302:t:2	u:72978	chr8:11199631:11199882:-	u:72975	chr8:11199052:11199142:-	tag:tandem
Arl4c:m4302:t:0	u:925	chr1:90596772:90598451:-	u:924	chr1:90594801:90596771:-	tag:tandem
Arl4a:m4302:a:0	u:15460	chr12:40759878:40761902:-	u:15454	chr12:40732034:40732298:-	tag:alter
Arl4a:m4302:a:1	u:15463	chr12:40762589:40763420:-	u:15454	chr12:40732034:40732298:-	tag:alter
Arl4a:m4302:t:0	u:15463	chr12:40762589:40763420:-	u:15460	chr12:40759878:40761902:-	tag:tandem
Chmp4c;BC020394:m4302:t:0	u:49615	chr3:10390416:10391004:+	u:49617	chr3:10391790:10393215:+	tag:tandem
Chmp4c;BC020394:m4302:t:1	u:49615	chr3:10390416:10391004:+	u:49618	chr3:10393216:10395343:+	tag:tandem
Chmp4c;BC020394:m4302:t:2	u:49617	chr3:10391790:10393215:+	u:49618	chr3:10393216:10395343:+	tag:tandem
Plxnb1:m4302:t:0	u:81542	chr9:109020865:109021162:+	u:81543	chr9:109021163:109021535:+	tag:tandem
Plxnb1:m4302:t:1	u:81542	chr9:109020865:109021162:+	u:81544	chr9:109021536:109022428:+	tag:tandem
Plxnb1:m4302:t:2	u:81543	chr9:109021163:109021535:+	u:81544	chr9:109021536:109022428:+	tag:tandem
Nars2:m4302:t:0	u:71899	chr7:104211223:104211736:+	u:71900	chr7:104211737:104211928:+	tag:tandem
Nars2:m4302:t:1	u:71899	chr7:104211223:104211736:+	u:71903	chr7:104212572:104213267:+	tag:tandem
Nars2:m4302:t:2	u:71900	chr7:104211737:104211928:+	u:71903	chr7:104212572:104213267:+	tag:tandem
Gfra1;GDNFR-alpha:m4302:t:0	u:39363	chr19:58312849:58313036:-	u:39362	chr19:58311182:58312848:-	tag:tandem
Ss18:m4302:t:0	u:35768	chr18:14785385:14785793:-	u:35767	chr18:14784138:14785384:-	tag:tandem
Zbtb49;Zfp509:m4302:t:0	u:57355	chr5:38591480:38592552:-	u:57353	chr5:38589023:38591282:-	tag:tandem
Zbtb49;Zfp509:m4302:a:0	u:57360	chr5:38603277:38605622:-	u:57353	chr5:38589023:38591282:-	tag:alter
Zbtb49;Zfp509:m4302:a:1	u:57360	chr5:38603277:38605622:-	u:57355	chr5:38591480:38592552:-	tag:alter
mFLJ00251;Fxc1;Tim9b:m4302:t:0	u:72117	chr7:112789541:112789863:+	u:72119	chr7:112790148:112790360:+	tag:tandem
Scaf8;Rbm16:m4302:a:0	u:33616	chr17:3197335:3198858:+	u:33618	chr17:3257737:3258896:+	tag:alter
Jmjd4:m4302:t:0	u:12887	chr11:59268808:59269387:+	u:12890	chr11:59269606:59271569:+	tag:tandem
Jmjd4:m4302:t:1	u:12887	chr11:59268808:59269387:+	u:12891	chr11:59271570:59271724:+	tag:tandem
Jmjd4:m4302:t:2	u:12890	chr11:59269606:59271569:+	u:12891	chr11:59271570:59271724:+	tag:tandem
Jmjd8:m4302:t:0	u:34181	chr17:25967535:25968711:+	u:34183	chr17:25968788:25971205:+	tag:tandem
Susd4:m4302:t:0	u:4808	chr1:184825358:184825784:+	u:4809	chr1:184825785:184826553:+	tag:tandem
Susd2:m4302:t:0	u:5805	chr10:75099668:75099857:-	u:5804	chr10:75099451:75099667:-	tag:tandem
Capza2:m4302:t:0	u:64549	chr6:17615454:17616119:+	u:64550	chr6:17616120:17616382:+	tag:tandem
Capza2:m4302:t:1	u:64549	chr6:17615454:17616119:+	u:64552	chr6:17616439:17616535:+	tag:tandem
Capza2:m4302:t:2	u:64549	chr6:17615454:17616119:+	u:64553	chr6:17616536:17616721:+	tag:tandem
Capza2:m4302:t:3	u:64550	chr6:17616120:17616382:+	u:64552	chr6:17616439:17616535:+	tag:tandem
Capza2:m4302:t:4	u:64550	chr6:17616120:17616382:+	u:64553	chr6:17616536:17616721:+	tag:tandem
Capza2:m4302:t:5	u:64552	chr6:17616439:17616535:+	u:64553	chr6:17616536:17616721:+	tag:tandem
Capza1:m4302:t:0	u:48838	chr3:104625911:104627901:-	u:48837	chr3:104625855:104625910:-	tag:tandem
Ctsc:m4302:a:0	u:71826	chr7:95437170:95439907:+	u:71827	chr7:95458412:95458821:+	tag:alter
Dlst:m4302:a:0	u:18229	chr12:86452182:86455026:+	u:18243	chr12:86474422:86475040:+	tag:alter
Dlst:m4302:a:1	u:18229	chr12:86452182:86455026:+	u:18244	chr12:86475041:86475802:+	tag:alter
Dlst:m4302:t:0	u:18243	chr12:86474422:86475040:+	u:18244	chr12:86475041:86475802:+	tag:tandem
Mrpl52:m4302:a:0	u:25056	chr14:55045808:55045942:+	u:25059	chr14:55048418:55048586:+	tag:alter
Nfyb:m4302:t:0	u:6193	chr10:82212924:82215055:-	u:6189	chr10:82211700:82212031:-	tag:tandem
4930427A07Rik:m4302:t:0	u:18944	chr12:114401593:114402757:+	u:18945	chr12:114402758:114403668:+	tag:tandem
Sfrs14;Sugp2:m4302:t:0	u:75811	chr8:72784367:72784943:+	u:75813	chr8:72785216:72786914:+	tag:tandem
Sfrs14;Sugp2:m4302:t:1	u:75811	chr8:72784367:72784943:+	u:75814	chr8:72786915:72787003:+	tag:tandem
Sfrs14;Sugp2:m4302:t:2	u:75813	chr8:72785216:72786914:+	u:75814	chr8:72786915:72787003:+	tag:tandem
Gca:m4302:t:0	u:45027	chr2:62529850:62531556:+	u:45028	chr2:62531557:62532039:+	tag:tandem
Gcg:m4302:t:0	u:41765	chr2:62312834:62313034:-	u:41764	chr2:62312587:62312833:-	tag:tandem
Thra:m4302:t:0	u:14238	chr11:98625842:98626424:+	u:14239	chr11:98626425:98629002:+	tag:tandem
Thra:m4302:a:0	u:14238	chr11:98625842:98626424:+	u:14241	chr11:98629717:98630165:+	tag:alter
Thra:m4302:a:1	u:14239	chr11:98626425:98629002:+	u:14241	chr11:98629717:98630165:+	tag:alter
Eri1:m4302:t:0	u:73399	chr8:36530477:36531556:-	u:73397	chr8:36529382:36530287:-	tag:tandem
Mafb:m4302:t:0	u:43494	chr2:160190772:160191440:-	u:43492	chr2:160189699:160190505:-	tag:tandem
1110057K04Rik:m4302:a:0	u:17349	chr12:8234195:8237309:+	u:17352	chr12:8291750:8292564:+	tag:alter
Ntpcr:m4302:a:0	u:77165	chr8:128262026:128262985:+	u:77167	chr8:128271666:128271884:+	tag:alter
Tmed10:m4302:t:0	u:16015	chr12:86683745:86684056:-	u:16012	chr12:86681564:86682135:-	tag:tandem
Tmed10:m4302:t:1	u:16016	chr12:86684057:86684377:-	u:16012	chr12:86681564:86682135:-	tag:tandem
Tmed10:m4302:t:2	u:16016	chr12:86684057:86684377:-	u:16015	chr12:86683745:86684056:-	tag:tandem
Sykb:m4302:t:0	u:21414	chr13:52741164:52742869:+	u:21415	chr13:52742870:52744160:+	tag:tandem
Acsm2:m4302:t:0	u:72309	chr7:126739523:126740114:+	u:72310	chr7:126740115:126741803:+	tag:tandem
Acsm2:m4302:t:1	u:72309	chr7:126739523:126740114:+	u:72311	chr7:126741804:126744207:+	tag:tandem
Acsm2:m4302:t:2	u:72310	chr7:126740115:126741803:+	u:72311	chr7:126741804:126744207:+	tag:tandem
Acsm5:m4302:t:0	u:72299	chr7:126686312:126686442:+	u:72301	chr7:126686573:126686773:+	tag:tandem
Mosc1:m4302:t:0	u:2222	chr1:186611159:186611398:-	u:2221	chr1:186610697:186611158:-	tag:tandem
Mosc1:m4302:t:1	u:2223	chr1:186611399:186611532:-	u:2221	chr1:186610697:186611158:-	tag:tandem
Mosc1:m4302:t:2	u:2223	chr1:186611399:186611532:-	u:2222	chr1:186611159:186611398:-	tag:tandem
Kif1b:m4302:t:0	u:53986	chr4:148552972:148554822:-	u:53984	chr4:148550429:148551660:-	tag:tandem
Kif1b:m4302:a:0	u:53988	chr4:148607843:148611116:-	u:53984	chr4:148550429:148551660:-	tag:alter
Kif1b:m4302:a:1	u:53988	chr4:148607843:148611116:-	u:53986	chr4:148552972:148554822:-	tag:alter
Kif1c:m4302:t:0	u:13266	chr11:70542999:70543925:+	u:13267	chr11:70543926:70545472:+	tag:tandem
Rgs4:m4302:t:0	u:1924	chr1:171672452:171673575:-	u:1923	chr1:171671805:171672451:-	tag:tandem
Rgs5:m4302:t:0	u:4453	chr1:171622471:171622746:+	u:4454	chr1:171622747:171623656:+	tag:tandem
Rgs5:m4302:t:1	u:4453	chr1:171622471:171622746:+	u:4455	chr1:171623657:171625833:+	tag:tandem
Rgs5:m4302:t:2	u:4454	chr1:171622747:171623656:+	u:4455	chr1:171623657:171625833:+	tag:tandem
Rgs2:m4302:t:0	u:1505	chr1:145847833:145848118:-	u:1503	chr1:145846468:145847122:-	tag:tandem
Rgs2:m4302:t:1	u:1506	chr1:145848119:145848809:-	u:1503	chr1:145846468:145847122:-	tag:tandem
Rgs2:m4302:t:2	u:1506	chr1:145848119:145848809:-	u:1505	chr1:145847833:145848118:-	tag:tandem
Rgs3:m4302:t:0	u:54908	chr4:62318244:62318763:+	u:54909	chr4:62318764:62320695:+	tag:tandem
Rgs3:m4302:a:0	u:54908	chr4:62318244:62318763:+	u:54913	chr4:62363279:62364052:+	tag:alter
Rgs3:m4302:a:1	u:54909	chr4:62318764:62320695:+	u:54913	chr4:62363279:62364052:+	tag:alter
Rgs8:m4302:t:0	u:4253	chr1:155542024:155544560:+	u:4254	chr1:155544561:155544794:+	tag:tandem
Rgs9:m4302:a:0	u:11516	chr11:109091718:109097156:-	u:11514	chr11:109086669:109086939:-	tag:alter
Rgs9:m4302:a:1	u:11517	chr11:109115617:109119968:-	u:11514	chr11:109086669:109086939:-	tag:alter
Rgs9:m4302:a:2	u:11517	chr11:109115617:109119968:-	u:11516	chr11:109091718:109097156:-	tag:alter
Aass:m4302:t:0	u:62246	chr6:23022793:23022971:-	u:62245	chr6:23022636:23022792:-	tag:tandem
Kif11:m4302:t:0	u:40265	chr19:37494880:37495665:+	u:40266	chr19:37495666:37496247:+	tag:tandem
Rnf144b:m4302:t:0	u:21317	chr13:47339870:47341781:+	u:21318	chr13:47341782:47343359:+	tag:tandem
Rbm12:m4302:t:0	u:43397	chr2:155920361:155920617:-	u:43396	chr2:155919062:155920360:-	tag:tandem
Rbm12:m4302:t:1	u:43398	chr2:155920618:155924108:-	u:43396	chr2:155919062:155920360:-	tag:tandem
Rbm12:m4302:t:2	u:43398	chr2:155920618:155924108:-	u:43397	chr2:155920361:155920617:-	tag:tandem
Rbm15:m4302:t:0	u:48885	chr3:107129028:107129199:-	u:48884	chr3:107128859:107129027:-	tag:tandem
Rbm14:m4302:a:0	u:38126	chr19:4800567:4800922:-	u:38117	chr19:4742913:4744867:-	tag:alter
Rbm14:m4302:a:1	u:38127	chr19:4800923:4802507:-	u:38117	chr19:4742913:4744867:-	tag:alter
Rbm14:m4302:t:0	u:38127	chr19:4800923:4802507:-	u:38126	chr19:4800567:4800922:-	tag:tandem
Rbm18:m4302:t:0	u:41528	chr2:35973106:35973494:-	u:41526	chr2:35971599:35972469:-	tag:tandem
Gfpt1:m4302:a:0	u:65660	chr6:87004621:87005417:+	u:65663	chr6:87038350:87042114:+	tag:alter
mKIAA1026;9030409G11Rik:m4302:t:0	u:53792	chr4:141697076:141697694:-	u:53790	chr4:141695152:141696711:-	tag:tandem
Tfam:m4302:t:0	u:5775	chr10:70690684:70691204:-	u:5774	chr10:70688212:70690683:-	tag:tandem
Esyt1:m4302:a:0	u:6894	chr10:127951934:127952732:-	u:6893	chr10:127947299:127947675:-	tag:alter
Hmg20a:m4302:a:0	u:80426	chr9:56336872:56338087:+	u:80429	chr9:56343481:56344690:+	tag:alter
Thoc4:m4302:t:0	u:11981	chr11:120455825:120456166:-	u:11980	chr11:120453435:120455824:-	tag:tandem
B3galt6:m4302:t:0	u:54161	chr4:155364636:155364832:-	u:54160	chr4:155363575:155364635:-	tag:tandem
B3galt6:m4302:t:1	u:54164	chr4:155365137:155365747:-	u:54160	chr4:155363575:155364635:-	tag:tandem
B3galt6:m4302:t:2	u:54164	chr4:155365137:155365747:-	u:54161	chr4:155364636:155364832:-	tag:tandem
B3galt2:m4302:t:0	u:4138	chr1:145494526:145495227:+	u:4139	chr1:145495228:145495852:+	tag:tandem
B3galt2:m4302:t:1	u:4138	chr1:145494526:145495227:+	u:4141	chr1:145496040:145497066:+	tag:tandem
B3galt2:m4302:t:2	u:4139	chr1:145495228:145495852:+	u:4141	chr1:145496040:145497066:+	tag:tandem
Rtp4:m4302:t:0	u:30692	chr16:23613555:23613821:+	u:30693	chr16:23613822:23614310:+	tag:tandem
Ddit4l:m4302:t:0	u:51374	chr3:137289482:137290109:+	u:51375	chr3:137290110:137290303:+	tag:tandem
Ddit4l:m4302:t:1	u:51374	chr3:137289482:137290109:+	u:51376	chr3:137290304:137291300:+	tag:tandem
Ddit4l:m4302:t:2	u:51375	chr3:137290110:137290303:+	u:51376	chr3:137290304:137291300:+	tag:tandem
Spop:m4302:t:0	u:14053	chr11:95353155:95353923:+	u:14055	chr11:95354133:95354332:+	tag:tandem
Plcxd1:m4302:t:0	u:60918	chr5:110532413:110532829:+	u:60919	chr5:110532830:110534973:+	tag:tandem
Abcc12:m4302:t:0	u:74075	chr8:89028740:89029116:-	u:74074	chr8:89028478:89028739:-	tag:tandem
Mertk:m4302:t:0	u:46378	chr2:128627403:128627923:+	u:46379	chr2:128627924:128628630:+	tag:tandem
Snx15:m4302:t:0	u:38309	chr19:6119707:6119862:-	u:38308	chr19:6119401:6119706:-	tag:tandem
Snx13:m4302:t:0	u:17617	chr12:35829008:35830054:+	u:17619	chr12:35830134:35832148:+	tag:tandem
Snx19:m4302:t:0	u:79963	chr9:30272780:30273326:+	u:79964	chr9:30273327:30274158:+	tag:tandem
Snx18:m4302:t:0	u:20723	chr13:114382994:114384586:-	u:20722	chr13:114382387:114382993:-	tag:tandem
Lhx9:m4302:t:0	u:1435	chr1:140724575:140725230:-	u:1434	chr1:140721763:140724574:-	tag:tandem
Lhx9:m4302:a:0	u:1436	chr1:140725735:140727520:-	u:1434	chr1:140721763:140724574:-	tag:alter
Lhx9:m4302:a:1	u:1436	chr1:140725735:140727520:-	u:1435	chr1:140724575:140725230:-	tag:alter
Trub1:m4302:t:0	u:40755	chr19:57559755:57561506:+	u:40757	chr19:57562895:57563397:+	tag:tandem
Hs2st1;Hs2st:m4302:t:0	u:49381	chr3:144094626:144096407:-	u:49379	chr3:144092665:144094070:-	tag:tandem
Hs2st1;Hs2st:m4302:t:1	u:49383	chr3:144096524:144096821:-	u:49379	chr3:144092665:144094070:-	tag:tandem
Hs2st1;Hs2st:m4302:t:2	u:49383	chr3:144096524:144096821:-	u:49381	chr3:144094626:144096407:-	tag:tandem
Zfp503:m4302:t:0	u:22538	chr14:22803623:22804109:-	u:22537	chr14:22803359:22803622:-	tag:tandem
Fam82a1:m4302:t:0	u:35459	chr17:80081026:80081351:+	u:35462	chr17:80082153:80084314:+	tag:tandem
Clec14a:m4302:t:0	u:15589	chr12:59368090:59368441:-	u:15585	chr12:59366781:59367516:-	tag:tandem
Pink1:m4302:t:0	u:53672	chr4:137869387:137869472:-	u:53669	chr4:137867944:137868876:-	tag:tandem
Pink1:m4302:t:1	u:53673	chr4:137869473:137869833:-	u:53669	chr4:137867944:137868876:-	tag:tandem
Pink1:m4302:t:2	u:53673	chr4:137869473:137869833:-	u:53672	chr4:137869387:137869472:-	tag:tandem
Sap130:m4302:t:0	u:37073	chr18:31881984:31882381:+	u:37074	chr18:31882382:31882720:+	tag:tandem
Lcp2:m4302:t:0	u:12505	chr11:33990687:33991051:+	u:12507	chr11:33991276:33992279:+	tag:tandem
Lcp1:m4302:t:0	u:25470	chr14:75629145:75629604:+	u:25471	chr14:75629605:75630647:+	tag:tandem
Csde1:m4302:t:0	u:50899	chr3:102860856:102860995:+	u:50901	chr3:102861054:102861731:+	tag:tandem
Mynn:m4302:t:0	u:49769	chr3:30515735:30516118:+	u:49770	chr3:30516119:30516301:+	tag:tandem
Mynn:m4302:t:1	u:49769	chr3:30515735:30516118:+	u:49774	chr3:30516829:30517418:+	tag:tandem
Mynn:m4302:t:2	u:49770	chr3:30516119:30516301:+	u:49774	chr3:30516829:30517418:+	tag:tandem
Tnip1:m4302:t:0	u:9926	chr11:54724587:54725038:-	u:9925	chr11:54724289:54724586:-	tag:tandem
Bcl2l1:m4302:t:0	u:43282	chr2:152606655:152607880:-	u:43281	chr2:152606404:152606654:-	tag:tandem
Bcl2l1:m4302:a:0	u:43283	chr2:152653863:152655096:-	u:43281	chr2:152606404:152606654:-	tag:alter
Bcl2l1:m4302:a:1	u:43283	chr2:152653863:152655096:-	u:43282	chr2:152606655:152607880:-	tag:alter
Bcl2l2:m4302:t:0	u:25071	chr14:55503755:55503884:+	u:25074	chr14:55505990:55506920:+	tag:tandem
Bcl2l2:m4302:t:1	u:25071	chr14:55503755:55503884:+	u:25076	chr14:55507077:55507930:+	tag:tandem
Bcl2l2:m4302:t:2	u:25074	chr14:55505990:55506920:+	u:25076	chr14:55507077:55507930:+	tag:tandem
Fgfr1:m4302:t:0	u:75338	chr8:26684393:26684886:+	u:75342	chr8:26685257:26686119:+	tag:tandem
Mxd3:m4302:t:0	u:19813	chr13:55426840:55427143:-	u:19812	chr13:55426529:55426839:-	tag:tandem
Clip3:m4302:t:0	u:70806	chr7:31091879:31092168:+	u:70807	chr7:31092169:31093385:+	tag:tandem
Clip1:m4302:t:0	u:58742	chr5:124028173:124028530:-	u:58740	chr5:124027873:124028095:-	tag:tandem
Clip4:m4302:a:0	u:35370	chr17:72152895:72153226:+	u:35380	chr17:72199231:72199503:+	tag:alter
Clip4:m4302:a:1	u:35370	chr17:72152895:72153226:+	u:35381	chr17:72205567:72207690:+	tag:alter
Clip4:m4302:a:2	u:35370	chr17:72152895:72153226:+	u:35382	chr17:72213098:72213428:+	tag:alter
Clip4:m4302:a:3	u:35380	chr17:72199231:72199503:+	u:35381	chr17:72205567:72207690:+	tag:alter
Clip4:m4302:a:4	u:35380	chr17:72199231:72199503:+	u:35382	chr17:72213098:72213428:+	tag:alter
Clip4:m4302:a:5	u:35381	chr17:72205567:72207690:+	u:35382	chr17:72213098:72213428:+	tag:alter
Lca5l:m4302:t:0	u:30086	chr16:96380293:96380674:-	u:30085	chr16:96380013:96380292:-	tag:tandem
Lca5l:m4302:a:0	u:30088	chr16:96403040:96404880:-	u:30085	chr16:96380013:96380292:-	tag:alter
Lca5l:m4302:a:1	u:30088	chr16:96403040:96404880:-	u:30086	chr16:96380293:96380674:-	tag:alter
Dhfr:m4302:t:0	u:21932	chr13:93155078:93155642:+	u:21935	chr13:93157849:93159007:+	tag:tandem
Shyc;Cyfip1:m4302:t:0	u:71294	chr7:63185532:63185871:+	u:71295	chr7:63185872:63186069:+	tag:tandem
2010305A19Rik:m4302:t:0	u:55424	chr4:108013323:108014148:+	u:55426	chr4:108014210:108014846:+	tag:tandem
Birc6:m4302:t:0	u:35413	chr17:75101723:75102238:+	u:35416	chr17:75102410:75102695:+	tag:tandem
Birc6:m4302:t:1	u:35413	chr17:75101723:75102238:+	u:35417	chr17:75102696:75103112:+	tag:tandem
Birc6:m4302:t:2	u:35416	chr17:75102410:75102695:+	u:35417	chr17:75102696:75103112:+	tag:tandem
Trim44:m4302:t:0	u:42228	chr2:102143929:102144633:-	u:42224	chr2:102140276:102141452:-	tag:tandem
Cdc37:m4302:t:0	u:77427	chr9:20943874:20944251:-	u:77426	chr9:20942979:20943873:-	tag:tandem
Inadl:m4302:a:0	u:55184	chr4:98163880:98164323:+	u:55185	chr4:98172372:98174884:+	tag:alter
Inadl:m4302:a:1	u:55184	chr4:98163880:98164323:+	u:55194	chr4:98384627:98385052:+	tag:alter
Inadl:m4302:a:2	u:55184	chr4:98163880:98164323:+	u:55195	chr4:98385053:98386293:+	tag:alter
Inadl:m4302:a:3	u:55185	chr4:98172372:98174884:+	u:55194	chr4:98384627:98385052:+	tag:alter
Inadl:m4302:a:4	u:55185	chr4:98172372:98174884:+	u:55195	chr4:98385053:98386293:+	tag:alter
Inadl:m4302:t:0	u:55194	chr4:98384627:98385052:+	u:55195	chr4:98385053:98386293:+	tag:tandem
Lias:m4302:t:0	u:60291	chr5:65800032:65800220:+	u:60292	chr5:65800221:65800446:+	tag:tandem
Gfm1:m4302:t:0	u:50207	chr3:67278772:67278989:+	u:50209	chr3:67279059:67280448:+	tag:tandem
Nono:m4302:a:0	u:84212	chrX:98637160:98637769:+	u:84213	chrX:98643067:98643931:+	tag:alter
Gatsl2:m4302:t:0	u:61566	chr5:134614164:134616127:+	u:61568	chr5:134616656:134617627:+	tag:tandem
Sox10:m4302:t:0	u:26622	chr15:78985508:78986367:-	u:26621	chr15:78985343:78985507:-	tag:tandem
Sox11:m4302:t:0	u:15297	chr12:28020080:28023213:-	u:15296	chr12:28019457:28020079:-	tag:tandem
Sox11:m4302:t:1	u:15300	chr12:28024665:28026085:-	u:15296	chr12:28019457:28020079:-	tag:tandem
Sox11:m4302:t:2	u:15300	chr12:28024665:28026085:-	u:15297	chr12:28020080:28023213:-	tag:tandem
Sox12:m4302:t:0	u:43270	chr2:152220638:152222489:-	u:43269	chr2:152219347:152220637:-	tag:tandem
Sox17:m4302:t:0	u:11	chr1:4481462:4481796:-	u:10	chr1:4481009:4481461:-	tag:tandem
Add3:m4302:t:0	u:40654	chr19:53319780:53320388:+	u:40656	chr19:53320902:53321376:+	tag:tandem
Acp1:m4302:t:0	u:15341	chr12:31579832:31580740:-	u:15339	chr12:31578963:31579774:-	tag:tandem
Add1:m4302:t:0	u:60021	chr5:34973119:34973403:+	u:60023	chr5:34973571:34974953:+	tag:tandem
Pdp1:m4302:t:0	u:51776	chr4:11886953:11887719:-	u:51775	chr4:11885481:11886952:-	tag:tandem
Pdp2:m4302:t:0	u:76574	chr8:107119560:107120748:+	u:76575	chr8:107120749:107122922:+	tag:tandem
Fmo2:m4302:t:0	u:1812	chr1:164805174:164806858:-	u:1809	chr1:164804453:164805056:-	tag:tandem
Fmo2:m4302:a:0	u:1813	chr1:164818209:164818748:-	u:1809	chr1:164804453:164805056:-	tag:alter
Fmo2:m4302:a:1	u:1813	chr1:164818209:164818748:-	u:1812	chr1:164805174:164806858:-	tag:alter
Fmo5:m4302:t:0	u:50803	chr3:97455750:97456519:+	u:50804	chr3:97456520:97459211:+	tag:tandem
Pdxdc1:m4302:t:0	u:29011	chr16:13833666:13834022:-	u:29010	chr16:13833255:13833665:-	tag:tandem
Pdxdc1:m4302:t:1	u:29013	chr16:13834247:13834638:-	u:29010	chr16:13833255:13833665:-	tag:tandem
Pdxdc1:m4302:t:2	u:29014	chr16:13834639:13834913:-	u:29010	chr16:13833255:13833665:-	tag:tandem
Pdxdc1:m4302:t:3	u:29013	chr16:13834247:13834638:-	u:29011	chr16:13833666:13834022:-	tag:tandem
Pdxdc1:m4302:t:4	u:29014	chr16:13834639:13834913:-	u:29011	chr16:13833666:13834022:-	tag:tandem
Pdxdc1:m4302:t:5	u:29014	chr16:13834639:13834913:-	u:29013	chr16:13834247:13834638:-	tag:tandem
Lck:m4302:a:0	u:53402	chr4:129234058:129234273:-	u:53401	chr4:129225588:129226041:-	tag:alter
Cd2bp2:m4302:t:0	u:69673	chr7:134337187:134337333:-	u:69671	chr7:134335540:134336820:-	tag:tandem
Uba7;Ube1l:m4302:a:0	u:81413	chr9:107885593:107885693:+	u:81414	chr9:107885698:107886388:+	tag:alter
Nmnat1:m4302:t:0	u:54000	chr4:148842896:148843740:-	u:53998	chr4:148841678:148842671:-	tag:tandem
Atg2b:m4302:t:0	u:16382	chr12:106854348:106855013:-	u:16381	chr12:106851749:106854347:-	tag:tandem
Atg2b:m4302:a:0	u:16384	chr12:106897474:106899205:-	u:16381	chr12:106851749:106854347:-	tag:alter
Atg2b:m4302:a:1	u:16384	chr12:106897474:106899205:-	u:16382	chr12:106854348:106855013:-	tag:alter
Ctnnbip1:m4302:t:0	u:56490	chr4:148938372:148938619:+	u:56492	chr4:148938922:148940545:+	tag:tandem
Hnf4a:m4302:t:0	u:47198	chr2:163395827:163398129:+	u:47199	chr2:163398130:163398642:+	tag:tandem
S1pr3:m4302:t:0	u:21390	chr13:51515290:51515647:+	u:21391	chr13:51515648:51517251:+	tag:tandem
S1pr3:m4302:t:1	u:21390	chr13:51515290:51515647:+	u:21392	chr13:51517252:51517497:+	tag:tandem
S1pr3:m4302:t:2	u:21391	chr13:51515648:51517251:+	u:21392	chr13:51517252:51517497:+	tag:tandem
Rhot1:m4302:t:0	u:13670	chr11:80079361:80080119:+	u:13673	chr11:80080720:80081408:+	tag:tandem
Ptpn2:m4302:t:0	u:36518	chr18:67825239:67831641:-	u:36517	chr18:67825151:67825238:-	tag:tandem
Ptpn2:m4302:t:1	u:36520	chr18:67831851:67832226:-	u:36517	chr18:67825151:67825238:-	tag:tandem
Ptpn2:m4302:t:2	u:36520	chr18:67831851:67832226:-	u:36518	chr18:67825239:67831641:-	tag:tandem
Ptpn1:m4302:t:0	u:47359	chr2:167801924:167802436:+	u:47360	chr2:167802437:167804741:+	tag:tandem
Rab12:m4302:t:0	u:33280	chr17:66844627:66845029:-	u:33279	chr17:66844303:66844626:-	tag:tandem
AI317395:m4302:t:0	u:5340	chr10:39722147:39722427:-	u:5339	chr10:39721378:39722146:-	tag:tandem
Kcnn1:m4302:t:0	u:73781	chr8:73367803:73367970:-	u:73779	chr8:73367062:73367702:-	tag:tandem
Kcnn1:m4302:t:1	u:73782	chr8:73367971:73368214:-	u:73779	chr8:73367062:73367702:-	tag:tandem
Kcnn1:m4302:t:2	u:73782	chr8:73367971:73368214:-	u:73781	chr8:73367803:73367970:-	tag:tandem
Mtus1:m4302:t:0	u:73468	chr8:42078405:42078773:-	u:73465	chr8:42076770:42077918:-	tag:tandem
Ero1lb:m4302:a:0	u:20872	chr13:12699154:12701794:+	u:20873	chr13:12701949:12703662:+	tag:alter
Fam154b:m4302:a:0	u:68800	chr7:89794678:89794970:-	u:68798	chr7:89781470:89782973:-	tag:alter
Atad5:m4302:a:0	u:13657	chr11:79915535:79916495:+	u:13658	chr11:79947873:79949295:+	tag:alter
Mapk1:m4302:t:0	u:30396	chr16:17038523:17038737:+	u:30397	chr16:17038738:17039165:+	tag:tandem
Mapk1:m4302:a:0	u:30396	chr16:17038523:17038737:+	u:30398	chr16:17043778:17044838:+	tag:alter
Mapk1:m4302:a:1	u:30396	chr16:17038523:17038737:+	u:30399	chr16:17044839:17044918:+	tag:alter
Mapk1:m4302:a:2	u:30396	chr16:17038523:17038737:+	u:30402	chr16:17045374:17047545:+	tag:alter
Mapk1:m4302:a:3	u:30397	chr16:17038738:17039165:+	u:30398	chr16:17043778:17044838:+	tag:alter
Mapk1:m4302:a:4	u:30397	chr16:17038738:17039165:+	u:30399	chr16:17044839:17044918:+	tag:alter
Mapk1:m4302:a:5	u:30397	chr16:17038738:17039165:+	u:30402	chr16:17045374:17047545:+	tag:alter
Mapk1:m4302:t:1	u:30398	chr16:17043778:17044838:+	u:30399	chr16:17044839:17044918:+	tag:tandem
Mapk1:m4302:t:2	u:30398	chr16:17043778:17044838:+	u:30402	chr16:17045374:17047545:+	tag:tandem
Mapk1:m4302:t:3	u:30399	chr16:17044839:17044918:+	u:30402	chr16:17045374:17047545:+	tag:tandem
Mapk6:m4302:a:0	u:78717	chr9:75241541:75243146:-	u:78715	chr9:75234708:75235666:-	tag:alter
Mapk9:m4302:t:0	u:12610	chr11:49696660:49697391:+	u:12611	chr11:49697392:49699613:+	tag:tandem
Ptges3:m4302:t:0	u:9016	chr10:127513142:127514054:+	u:9017	chr10:127514055:127514325:+	tag:tandem
Hoxc5:m4302:t:0	u:28793	chr15:102845873:102846717:+	u:28794	chr15:102846718:102847859:+	tag:tandem
Fbln1:m4302:t:0	u:28438	chr15:85115609:85116120:+	u:28439	chr15:85116121:85116723:+	tag:tandem
Fbln5:m4302:t:0	u:16283	chr12:102988150:102988951:-	u:16282	chr12:102984775:102988149:-	tag:tandem
Eif2d:m4302:a:0	u:3883	chr1:133067513:133068084:+	u:3889	chr1:133076649:133076978:+	tag:alter
Prrc2c;Bat2d:m4302:t:0	u:1800	chr1:164601916:164603737:-	u:1799	chr1:164600858:164601915:-	tag:tandem
Cdc42se1:m4302:t:0	u:50669	chr3:95038298:95038498:+	u:50670	chr3:95038499:95038817:+	tag:tandem
Cdc42se1:m4302:t:1	u:50669	chr3:95038298:95038498:+	u:50671	chr3:95038818:95040334:+	tag:tandem
Cdc42se1:m4302:t:2	u:50670	chr3:95038499:95038817:+	u:50671	chr3:95038818:95040334:+	tag:tandem
Heyl:m4302:t:0	u:55710	chr4:122925107:122925962:+	u:55711	chr4:122925963:122927118:+	tag:tandem
Klc1:m4302:a:0	u:18896	chr12:113032553:113033109:+	u:18897	chr12:113044528:113044924:+	tag:alter
Smek1:m4302:a:0	u:16268	chr12:102295181:102296479:-	u:16267	chr12:102278253:102278878:-	tag:alter
Smek2:m4302:t:0	u:12394	chr11:29118551:29120001:+	u:12395	chr11:29120002:29120796:+	tag:tandem
Ms4a6b:m4302:t:0	u:39882	chr19:11604073:11604557:+	u:39884	chr19:11604893:11605556:+	tag:tandem
Acad9:m4302:t:0	u:49890	chr3:35989853:35990059:+	u:49893	chr3:35990382:35991789:+	tag:tandem
Map4k5:m4302:t:0	u:15649	chr12:70906006:70906250:-	u:15648	chr12:70904740:70906005:-	tag:tandem
Map4k4:m4302:t:0	u:2739	chr1:40081557:40081812:+	u:2743	chr1:40082592:40083154:+	tag:tandem
Dtx4:m4302:t:0	u:38536	chr19:12542934:12543965:-	u:38535	chr19:12540824:12542933:-	tag:tandem
Dtx3:m4302:t:0	u:6830	chr10:126627698:126628171:-	u:6829	chr10:126627434:126627697:-	tag:tandem
Rapgef4:m4302:a:0	u:45197	chr2:71979421:71982510:+	u:45200	chr2:72094433:72095530:+	tag:alter
Rapgef5:m4302:t:0	u:19021	chr12:118994554:118995450:+	u:19023	chr12:118997811:118998210:+	tag:tandem
Rapgef3:m4302:t:0	u:27087	chr15:97575697:97575978:-	u:27086	chr15:97575384:97575696:-	tag:tandem
Cnih4:m4302:t:0	u:4758	chr1:183096339:183096544:+	u:4761	chr1:183097680:183099124:+	tag:tandem
Rnf219:m4302:a:0	u:23720	chr14:104901835:104902493:-	u:23718	chr14:104876751:104877983:-	tag:alter
Rnf215:m4302:t:0	u:12106	chr11:4040512:4040714:+	u:12107	chr11:4040715:4041194:+	tag:tandem
Rnf214:m4302:t:0	u:77874	chr9:45672453:45672811:-	u:77872	chr9:45671774:45672353:-	tag:tandem
Nov:m4302:t:0	u:27717	chr15:54584155:54585122:+	u:27718	chr15:54585123:54585329:+	tag:tandem
Gse1:m4302:t:0	u:76982	chr8:123102503:123103226:+	u:76984	chr8:123103269:123105282:+	tag:tandem
Gprc5b:m4302:t:0	u:69435	chr7:126117163:126117327:-	u:69434	chr7:126115554:126117162:-	tag:tandem
Gprc5b:m4302:t:1	u:69436	chr7:126117328:126117424:-	u:69434	chr7:126115554:126117162:-	tag:tandem
Gprc5b:m4302:t:2	u:69436	chr7:126117328:126117424:-	u:69435	chr7:126117163:126117327:-	tag:tandem
Mettl11a:m4302:a:0	u:44663	chr2:30671520:30673031:+	u:44664	chr2:30678138:30678547:+	tag:alter
Chst15:m4302:t:0	u:69818	chr7:139427938:139429956:-	u:69817	chr7:139427462:139427937:-	tag:tandem
Rfxank:m4302:t:0	u:73721	chr8:72656092:72657166:-	u:73720	chr8:72654693:72656091:-	tag:tandem
Bnc2:m4302:a:0	u:52638	chr4:84034587:84036609:-	u:52637	chr4:83918446:83921690:-	tag:alter
Pnn:m4302:t:0	u:17785	chr12:60172620:60173945:+	u:17788	chr12:60174235:60174843:+	tag:tandem
Fbxo3:m4302:t:0	u:45826	chr2:103900319:103900882:+	u:45829	chr2:103901170:103901563:+	tag:tandem
Fbxo3:m4302:t:1	u:45826	chr2:103900319:103900882:+	u:45832	chr2:103902146:103903128:+	tag:tandem
Fbxo3:m4302:t:2	u:45826	chr2:103900319:103900882:+	u:45833	chr2:103903129:103903396:+	tag:tandem
Fbxo3:m4302:t:3	u:45829	chr2:103901170:103901563:+	u:45832	chr2:103902146:103903128:+	tag:tandem
Fbxo3:m4302:t:4	u:45829	chr2:103901170:103901563:+	u:45833	chr2:103903129:103903396:+	tag:tandem
Fbxo3:m4302:t:5	u:45832	chr2:103902146:103903128:+	u:45833	chr2:103903129:103903396:+	tag:tandem
Fbxo9:m4302:a:0	u:78760	chr9:77946153:77946252:-	u:78757	chr9:77929306:77929519:-	tag:alter
Swap70:m4302:t:0	u:72198	chr7:117424851:117426016:+	u:72199	chr7:117426017:117426951:+	tag:tandem
Rbpms:m4302:t:0	u:73381	chr8:34894536:34894658:-	u:73380	chr8:34893116:34894535:-	tag:tandem
Hapln1:m4302:t:0	u:21890	chr13:89747754:89749259:+	u:21891	chr13:89749260:89751036:+	tag:tandem
Hapln1:m4302:t:1	u:21890	chr13:89747754:89749259:+	u:21892	chr13:89751037:89751436:+	tag:tandem
Hapln1:m4302:t:2	u:21891	chr13:89749260:89751036:+	u:21892	chr13:89751037:89751436:+	tag:tandem
Hapln2:m4302:t:0	u:48379	chr3:87825672:87826463:-	u:48378	chr3:87824485:87825671:-	tag:tandem
AK203717;6330416G13Rik:m4302:t:0	u:55001	chr4:63245852:63246051:+	u:55003	chr4:63246099:63246755:+	tag:tandem
AK203717;6330416G13Rik:m4302:t:1	u:55001	chr4:63245852:63246051:+	u:55004	chr4:63246756:63247390:+	tag:tandem
AK203717;6330416G13Rik:m4302:t:2	u:55003	chr4:63246099:63246755:+	u:55004	chr4:63246756:63247390:+	tag:tandem
Mrp63:m4302:t:0	u:25216	chr14:58445662:58445784:+	u:25218	chr14:58446710:58447581:+	tag:tandem
Dot1l:m4302:t:0	u:8196	chr10:80256563:80257093:+	u:8198	chr10:80257184:80258208:+	tag:tandem
Arhgef10:m4302:t:0	u:75161	chr8:14999830:15000439:+	u:75162	chr8:15000440:15001084:+	tag:tandem
Arhgef17:m4302:t:0	u:69069	chr7:108020649:108021496:-	u:69067	chr7:108018260:108020588:-	tag:tandem
Arhgef18:m4302:a:0	u:74931	chr8:3448825:3450639:+	u:74933	chr8:3454806:3456180:+	tag:alter
Arhgef18:m4302:a:1	u:74931	chr8:3448825:3450639:+	u:74934	chr8:3456181:3456600:+	tag:alter
Arhgef18:m4302:t:0	u:74933	chr8:3454806:3456180:+	u:74934	chr8:3456181:3456600:+	tag:tandem
Atp6v1a:m4302:t:0	u:29622	chr16:44087032:44087204:-	u:29621	chr16:44085757:44087031:-	tag:tandem
Atp6v1a:m4302:t:1	u:29623	chr16:44087205:44087536:-	u:29621	chr16:44085757:44087031:-	tag:tandem
Atp6v1a:m4302:t:2	u:29623	chr16:44087205:44087536:-	u:29622	chr16:44087032:44087204:-	tag:tandem
D5Ertd579e:m4302:t:0	u:57323	chr5:36943314:36944122:-	u:57322	chr5:36943138:36943313:-	tag:tandem
Rfng:m4302:t:0	u:12007	chr11:120642494:120643135:-	u:12006	chr11:120642059:120642493:-	tag:tandem
Stau1:m4302:t:0	u:43732	chr2:166773775:166774354:-	u:43730	chr2:166773174:166773630:-	tag:tandem
Stau1:m4302:t:1	u:43733	chr2:166774355:166774859:-	u:43730	chr2:166773174:166773630:-	tag:tandem
Stau1:m4302:t:2	u:43733	chr2:166774355:166774859:-	u:43732	chr2:166773775:166774354:-	tag:tandem
Kremen1:m4302:t:0	u:9250	chr11:5093893:5094955:-	u:9249	chr11:5091554:5093892:-	tag:tandem
Tbl1xr1:m4302:t:0	u:49714	chr3:22109349:22109792:+	u:49715	chr3:22109793:22110453:+	tag:tandem
Tbl1xr1:m4302:t:1	u:49714	chr3:22109349:22109792:+	u:49716	chr3:22110454:22114213:+	tag:tandem
Tbl1xr1:m4302:t:2	u:49714	chr3:22109349:22109792:+	u:49718	chr3:22114371:22115515:+	tag:tandem
Tbl1xr1:m4302:t:3	u:49715	chr3:22109793:22110453:+	u:49716	chr3:22110454:22114213:+	tag:tandem
Tbl1xr1:m4302:t:4	u:49715	chr3:22109793:22110453:+	u:49718	chr3:22114371:22115515:+	tag:tandem
Tbl1xr1:m4302:t:5	u:49716	chr3:22110454:22114213:+	u:49718	chr3:22114371:22115515:+	tag:tandem
Slc5a1:m4302:t:0	u:59954	chr5:33503651:33504000:+	u:59955	chr5:33504001:33505347:+	tag:tandem
Dusp8:m4302:t:0	u:70057	chr7:149267401:149267764:-	u:70056	chr7:149265399:149267400:-	tag:tandem
Dusp7:m4302:t:0	u:81363	chr9:106276277:106276928:+	u:81364	chr9:106276929:106278054:+	tag:tandem
Dusp1:m4302:t:0	u:32133	chr17:26642757:26643224:-	u:32132	chr17:26642536:26642756:-	tag:tandem
Dusp3:m4302:t:0	u:11290	chr11:101834777:101835466:-	u:11289	chr11:101832458:101834776:-	tag:tandem
Dusp3:m4302:t:1	u:11292	chr11:101835652:101836047:-	u:11289	chr11:101832458:101834776:-	tag:tandem
Dusp3:m4302:t:2	u:11292	chr11:101835652:101836047:-	u:11290	chr11:101834777:101835466:-	tag:tandem
Ubr3:m4302:t:0	u:45091	chr2:69859717:69860223:+	u:45093	chr2:69860602:69861805:+	tag:tandem
Ubr3:m4302:t:1	u:45091	chr2:69859717:69860223:+	u:45094	chr2:69861806:69862069:+	tag:tandem
Ubr3:m4302:t:2	u:45091	chr2:69859717:69860223:+	u:45095	chr2:69862070:69862633:+	tag:tandem
Ubr3:m4302:t:3	u:45093	chr2:69860602:69861805:+	u:45094	chr2:69861806:69862069:+	tag:tandem
Ubr3:m4302:t:4	u:45093	chr2:69860602:69861805:+	u:45095	chr2:69862070:69862633:+	tag:tandem
Ubr3:m4302:t:5	u:45094	chr2:69861806:69862069:+	u:45095	chr2:69862070:69862633:+	tag:tandem
Hspa12a:m4302:t:0	u:39378	chr19:58871562:58873850:-	u:39377	chr19:58870241:58871561:-	tag:tandem
Ddx26b:m4302:a:0	u:83895	chrX:53746358:53748905:+	u:83896	chrX:53760165:53761019:+	tag:alter
Angptl7:m4302:t:0	u:53957	chr4:147869717:147869915:-	u:53956	chr4:147869469:147869716:-	tag:tandem
Angptl4:m4302:t:0	u:32495	chr17:33911845:33912331:-	u:32494	chr17:33910694:33911844:-	tag:tandem
Angptl2:m4302:a:0	u:44775	chr2:33084734:33085643:+	u:44776	chr2:33097952:33100038:+	tag:alter
Angptl2:m4302:a:1	u:44775	chr2:33084734:33085643:+	u:44779	chr2:33102069:33103179:+	tag:alter
Angptl2:m4302:a:2	u:44776	chr2:33097952:33100038:+	u:44779	chr2:33102069:33103179:+	tag:alter
Fam100a:m4302:t:0	u:28871	chr16:4875112:4875518:-	u:28870	chr16:4874779:4875111:-	tag:tandem
Eid1:m4302:t:0	u:46321	chr2:125499407:125499798:+	u:46322	chr2:125499799:125500386:+	tag:tandem
Eid1:m4302:t:1	u:46321	chr2:125499407:125499798:+	u:46323	chr2:125500387:125500519:+	tag:tandem
Eid1:m4302:t:2	u:46322	chr2:125499799:125500386:+	u:46323	chr2:125500387:125500519:+	tag:tandem
Sdhd:m4302:t:0	u:77937	chr9:50404905:50405189:-	u:77936	chr9:50404445:50404904:-	tag:tandem
Atp9a:m4302:a:0	u:43792	chr2:168492579:168493070:-	u:43791	chr2:168459938:168460271:-	tag:alter
Atxn10:m4302:t:0	u:28441	chr15:85293493:85293639:+	u:28442	chr15:85293640:85294271:+	tag:tandem
Atxn1l:m4302:t:0	u:74508	chr8:112250549:112251457:-	u:74507	chr8:112250351:112250548:-	tag:tandem
Yaf2;YAF2:m4302:t:0	u:27001	chr15:93115275:93115611:-	u:27000	chr15:93114710:93115274:-	tag:tandem
Yaf2;YAF2:m4302:t:1	u:27002	chr15:93115612:93116053:-	u:27000	chr15:93114710:93115274:-	tag:tandem
Yaf2;YAF2:m4302:t:2	u:27002	chr15:93115612:93116053:-	u:27001	chr15:93115275:93115611:-	tag:tandem
Sys1:m4302:t:0	u:47232	chr2:164289857:164290465:+	u:47233	chr2:164290466:164290844:+	tag:tandem
Sys1:m4302:a:0	u:47232	chr2:164289857:164290465:+	u:47238	chr2:164299140:164299797:+	tag:alter
Sys1:m4302:a:1	u:47233	chr2:164290466:164290844:+	u:47238	chr2:164299140:164299797:+	tag:alter
Sec22c:m4302:t:0	u:79575	chr9:121592140:121593775:-	u:79574	chr9:121589163:121592139:-	tag:tandem
Sec22b:m4302:t:0	u:50812	chr3:97725193:97725813:+	u:50814	chr3:97726241:97727197:+	tag:tandem
Tasp1:m4302:a:0	u:42976	chr2:139802359:139803449:-	u:42969	chr2:139659293:139660183:-	tag:alter
Ppp2ca:m4302:t:0	u:12682	chr11:51935476:51935896:+	u:12683	chr11:51935897:51936113:+	tag:tandem
Ppp2ca:m4302:t:1	u:12682	chr11:51935476:51935896:+	u:12685	chr11:51936251:51936898:+	tag:tandem
Ppp2ca:m4302:t:2	u:12683	chr11:51935897:51936113:+	u:12685	chr11:51936251:51936898:+	tag:tandem
Llgl1:m4302:t:0	u:12948	chr11:60526771:60527398:+	u:12949	chr11:60527399:60527689:+	tag:tandem
Arhgap42:m4302:t:0	u:77298	chr9:8994574:8994786:-	u:77297	chr9:8994331:8994573:-	tag:tandem
Arhgap42:m4302:t:1	u:77299	chr9:8994787:8994952:-	u:77297	chr9:8994331:8994573:-	tag:tandem
Arhgap42:m4302:t:2	u:77299	chr9:8994787:8994952:-	u:77298	chr9:8994574:8994786:-	tag:tandem
Ppp3ca:m4302:t:0	u:51364	chr3:136598189:136598665:+	u:51366	chr3:136598743:136599812:+	tag:tandem
Ppp3ca:m4302:t:1	u:51364	chr3:136598189:136598665:+	u:51367	chr3:136599813:136600353:+	tag:tandem
Ppp3ca:m4302:t:2	u:51366	chr3:136598743:136599812:+	u:51367	chr3:136599813:136600353:+	tag:tandem
Ppp3cb:m4302:t:0	u:22499	chr14:21319252:21319641:-	u:22496	chr14:21318586:21318902:-	tag:tandem
Ppp3cb:m4302:t:1	u:22501	chr14:21319732:21320705:-	u:22496	chr14:21318586:21318902:-	tag:tandem
Ppp3cb:m4302:a:0	u:22502	chr14:21326894:21327113:-	u:22496	chr14:21318586:21318902:-	tag:alter
Ppp3cb:m4302:a:1	u:22503	chr14:21327114:21327720:-	u:22496	chr14:21318586:21318902:-	tag:alter
Ppp3cb:m4302:t:2	u:22501	chr14:21319732:21320705:-	u:22499	chr14:21319252:21319641:-	tag:tandem
Ppp3cb:m4302:a:2	u:22502	chr14:21326894:21327113:-	u:22499	chr14:21319252:21319641:-	tag:alter
Ppp3cb:m4302:a:3	u:22503	chr14:21327114:21327720:-	u:22499	chr14:21319252:21319641:-	tag:alter
Ppp3cb:m4302:a:4	u:22502	chr14:21326894:21327113:-	u:22501	chr14:21319732:21320705:-	tag:alter
Ppp3cb:m4302:a:5	u:22503	chr14:21327114:21327720:-	u:22501	chr14:21319732:21320705:-	tag:alter
Ppp3cb:m4302:t:3	u:22503	chr14:21327114:21327720:-	u:22502	chr14:21326894:21327113:-	tag:tandem
Chl1:m4302:t:0	u:65844	chr6:103679329:103679709:+	u:65846	chr6:103679822:103680603:+	tag:tandem
Chl1:m4302:t:1	u:65844	chr6:103679329:103679709:+	u:65847	chr6:103680604:103683028:+	tag:tandem
Chl1:m4302:a:0	u:65844	chr6:103679329:103679709:+	u:65848	chr6:103699671:103700204:+	tag:alter
Chl1:m4302:t:2	u:65846	chr6:103679822:103680603:+	u:65847	chr6:103680604:103683028:+	tag:tandem
Chl1:m4302:a:1	u:65846	chr6:103679822:103680603:+	u:65848	chr6:103699671:103700204:+	tag:alter
Chl1:m4302:a:2	u:65847	chr6:103680604:103683028:+	u:65848	chr6:103699671:103700204:+	tag:alter
Arfrp1:m4302:t:0	u:44030	chr2:181093678:181093976:-	u:44028	chr2:181093197:181093614:-	tag:tandem
Arfrp1:m4302:t:1	u:44031	chr2:181093977:181094266:-	u:44028	chr2:181093197:181093614:-	tag:tandem
Arfrp1:m4302:t:2	u:44031	chr2:181093977:181094266:-	u:44030	chr2:181093678:181093976:-	tag:tandem
A930038C07Rik:m4302:t:0	u:65262	chr6:65654439:65655078:+	u:65263	chr6:65655079:65656923:+	tag:tandem
Nup50:m4302:t:0	u:28416	chr15:84770278:84770438:+	u:28419	chr15:84771000:84772176:+	tag:tandem
Nup50:m4302:t:1	u:28416	chr15:84770278:84770438:+	u:28421	chr15:84772859:84773392:+	tag:tandem
Nup50:m4302:t:2	u:28419	chr15:84771000:84772176:+	u:28421	chr15:84772859:84773392:+	tag:tandem
Ldlrap1:m4302:t:0	u:53587	chr4:134301327:134303114:-	u:53586	chr4:134300660:134301326:-	tag:tandem
Strn4:m4302:t:0	u:70431	chr7:17425554:17426100:+	u:70432	chr7:17426101:17426279:+	tag:tandem
Atp13a3:m4302:t:0	u:29420	chr16:30315646:30315789:-	u:29418	chr16:30312717:30313245:-	tag:tandem
Pkd1:m4302:t:0	u:34119	chr17:24732016:24733012:+	u:34120	chr17:24733013:24733458:+	tag:tandem
Gpx3:m4302:t:0	u:12778	chr11:54723160:54723388:+	u:12779	chr11:54723389:54723634:+	tag:tandem
Gpx3:m4302:t:1	u:12778	chr11:54723160:54723388:+	u:12780	chr11:54723635:54723888:+	tag:tandem
Gpx3:m4302:t:2	u:12779	chr11:54723389:54723634:+	u:12780	chr11:54723635:54723888:+	tag:tandem
Ccar1:m4302:a:0	u:5666	chr10:62232728:62234646:-	u:5663	chr10:62207208:62207363:-	tag:alter
Yap1:m4302:t:0	u:77286	chr9:7933911:7934496:-	u:77284	chr9:7932131:7933613:-	tag:tandem
4933431E20Rik:m4302:t:0	u:48921	chr3:107694389:107695674:-	u:48920	chr3:107691768:107694388:-	tag:tandem
Pcm1;pcm-1:m4302:t:0	u:75527	chr8:42416274:42416491:+	u:75528	chr8:42416492:42417697:+	tag:tandem
Pcm1;pcm-1:m4302:t:1	u:75527	chr8:42416274:42416491:+	u:75530	chr8:42418113:42419440:+	tag:tandem
Pcm1;pcm-1:m4302:t:2	u:75528	chr8:42416492:42417697:+	u:75530	chr8:42418113:42419440:+	tag:tandem
Fam55d:m4302:t:0	u:80302	chr9:48204961:48207602:+	u:80303	chr9:48207603:48207982:+	tag:tandem
Fam55c:m4302:t:0	u:29719	chr16:55843275:55844288:-	u:29718	chr16:55840066:55843274:-	tag:tandem
Sike1:m4302:t:0	u:50892	chr3:102805732:102805993:+	u:50894	chr3:102806137:102806909:+	tag:tandem
Sike1:m4302:t:1	u:50892	chr3:102805732:102805993:+	u:50895	chr3:102806910:102807403:+	tag:tandem
Sike1:m4302:t:2	u:50894	chr3:102806137:102806909:+	u:50895	chr3:102806910:102807403:+	tag:tandem
P2rx3:m4302:t:0	u:42040	chr2:84838740:84839169:-	u:42039	chr2:84836709:84838739:-	tag:tandem
P2rx4:m4302:t:0	u:61357	chr5:123178322:123179053:+	u:61358	chr5:123179054:123179746:+	tag:tandem
P2rx7:m4302:t:0	u:61353	chr5:123131313:123133533:+	u:61354	chr5:123133534:123134292:+	tag:tandem
Klf17:m4302:t:0	u:53106	chr4:117430418:117431711:-	u:53105	chr4:117429264:117430417:-	tag:tandem
D10920:m4302:t:0	u:54917	chr4:62796041:62800120:+	u:54918	chr4:62800121:62800477:+	tag:tandem
D10920:m4302:t:1	u:54917	chr4:62796041:62800120:+	u:54919	chr4:62800478:62800741:+	tag:tandem
D10920:m4302:t:2	u:54918	chr4:62800121:62800477:+	u:54919	chr4:62800478:62800741:+	tag:tandem
Hps3:m4302:a:0	u:47830	chr3:19916364:19918913:-	u:47820	chr3:19896164:19896685:-	tag:alter
Ldlr:m4302:a:0	u:79889	chr9:21542469:21542975:+	u:79890	chr9:21544321:21545445:+	tag:alter
Ldlr:m4302:a:1	u:79889	chr9:21542469:21542975:+	u:79891	chr9:21552620:21554154:+	tag:alter
Ldlr:m4302:a:2	u:79890	chr9:21544321:21545445:+	u:79891	chr9:21552620:21554154:+	tag:alter
Prelid1:m4302:t:0	u:21482	chr13:55426190:55426385:+	u:21483	chr13:55426386:55426632:+	tag:tandem
Eps8l1;Eps8R1:m4302:t:0	u:70258	chr7:4430442:4430697:+	u:70259	chr7:4430698:4430845:+	tag:tandem
Gpd1l:m4302:t:0	u:79482	chr9:114809875:114811065:-	u:79481	chr9:114808890:114809874:-	tag:tandem
Slu7:m4302:t:0	u:12540	chr11:43259693:43259812:+	u:12541	chr11:43259813:43260533:+	tag:tandem
Slu7:m4302:t:1	u:12540	chr11:43259693:43259812:+	u:12544	chr11:43260798:43261482:+	tag:tandem
Slu7:m4302:t:2	u:12541	chr11:43259813:43260533:+	u:12544	chr11:43260798:43261482:+	tag:tandem
Dleu2:m4302:t:0	u:23247	chr14:62222201:62222643:-	u:23246	chr14:62221817:62222200:-	tag:tandem
Kcnab1:m4302:t:0	u:50191	chr3:65180490:65181475:+	u:50192	chr3:65181476:65182144:+	tag:tandem
Depdc5:m4302:a:0	u:59949	chr5:33298804:33298948:+	u:59950	chr5:33333731:33334208:+	tag:alter
Depdc5:m4302:a:1	u:59949	chr5:33298804:33298948:+	u:59952	chr5:33334319:33336884:+	tag:alter
Depdc5:m4302:t:0	u:59950	chr5:33333731:33334208:+	u:59952	chr5:33334319:33336884:+	tag:tandem
Mest:m4302:t:0	u:64696	chr6:30697169:30698464:+	u:64697	chr6:30698465:30701256:+	tag:tandem
Bphl:m4302:a:0	u:21162	chr13:34152484:34153754:+	u:21163	chr13:34165632:34165942:+	tag:alter
2410002O22Rik:m4302:t:0	u:20646	chr13:104933403:104933961:-	u:20645	chr13:104932233:104933402:-	tag:tandem
2410002O22Rik:m4302:a:0	u:20649	chr13:104963799:104964213:-	u:20645	chr13:104932233:104933402:-	tag:alter
2410002O22Rik:m4302:a:1	u:20649	chr13:104963799:104964213:-	u:20646	chr13:104933403:104933961:-	tag:alter
Mapk8ip3;Eme2:m4302:t:0	u:32000	chr17:25026406:25029096:-	u:31999	chr17:25025420:25026405:-	tag:tandem
Mapk8ip3;Eme2:m4302:t:1	u:32001	chr17:25029097:25029628:-	u:31999	chr17:25025420:25026405:-	tag:tandem
Mapk8ip3;Eme2:m4302:t:2	u:32001	chr17:25029097:25029628:-	u:32000	chr17:25026406:25029096:-	tag:tandem
Myl12b:m4302:t:0	u:33310	chr17:71323364:71323663:-	u:33307	chr17:71322453:71323260:-	tag:tandem
Fadd:m4302:t:0	u:70158	chr7:151765599:151766433:-	u:70157	chr7:151764221:151765598:-	tag:tandem
AK036974:m4302:t:0	u:59285	chr5:149802658:149802876:-	u:59284	chr5:149801632:149802657:-	tag:tandem
AK036974:m4302:t:1	u:59286	chr5:149802877:149805100:-	u:59284	chr5:149801632:149802657:-	tag:tandem
AK036974:m4302:t:2	u:59286	chr5:149802877:149805100:-	u:59285	chr5:149802658:149802876:-	tag:tandem
Fam107a:m4302:t:0	u:22396	chr14:9130067:9131203:-	u:22393	chr14:9128785:9129363:-	tag:tandem
Fam107b:m4302:t:0	u:44069	chr2:3696889:3697342:+	u:44071	chr2:3697416:3699412:+	tag:tandem
Senp7;mKIAA1707:m4302:t:0	u:31136	chr16:56188485:56189033:+	u:31137	chr16:56189034:56190124:+	tag:tandem
Mdga2:m4302:t:0	u:15613	chr12:67572169:67572501:-	u:15612	chr12:67567046:67572168:-	tag:tandem
4933403F05Rik:m4302:t:0	u:36530	chr18:68421460:68425430:-	u:36529	chr18:68419830:68421459:-	tag:tandem
4933403F05Rik:m4302:t:1	u:36531	chr18:68425431:68425966:-	u:36529	chr18:68419830:68421459:-	tag:tandem
4933403F05Rik:m4302:t:2	u:36533	chr18:68426089:68426331:-	u:36529	chr18:68419830:68421459:-	tag:tandem
4933403F05Rik:m4302:t:3	u:36534	chr18:68426332:68426839:-	u:36529	chr18:68419830:68421459:-	tag:tandem
4933403F05Rik:m4302:t:4	u:36537	chr18:68427256:68427772:-	u:36529	chr18:68419830:68421459:-	tag:tandem
4933403F05Rik:m4302:t:5	u:36531	chr18:68425431:68425966:-	u:36530	chr18:68421460:68425430:-	tag:tandem
4933403F05Rik:m4302:t:6	u:36533	chr18:68426089:68426331:-	u:36530	chr18:68421460:68425430:-	tag:tandem
4933403F05Rik:m4302:t:7	u:36534	chr18:68426332:68426839:-	u:36530	chr18:68421460:68425430:-	tag:tandem
4933403F05Rik:m4302:t:8	u:36537	chr18:68427256:68427772:-	u:36530	chr18:68421460:68425430:-	tag:tandem
4933403F05Rik:m4302:t:9	u:36533	chr18:68426089:68426331:-	u:36531	chr18:68425431:68425966:-	tag:tandem
4933403F05Rik:m4302:t:10	u:36534	chr18:68426332:68426839:-	u:36531	chr18:68425431:68425966:-	tag:tandem
4933403F05Rik:m4302:t:11	u:36537	chr18:68427256:68427772:-	u:36531	chr18:68425431:68425966:-	tag:tandem
4933403F05Rik:m4302:t:12	u:36534	chr18:68426332:68426839:-	u:36533	chr18:68426089:68426331:-	tag:tandem
4933403F05Rik:m4302:t:13	u:36537	chr18:68427256:68427772:-	u:36533	chr18:68426089:68426331:-	tag:tandem
4933403F05Rik:m4302:t:14	u:36537	chr18:68427256:68427772:-	u:36534	chr18:68426332:68426839:-	tag:tandem
Gorab:m4302:t:0	u:1823	chr1:165316105:165316828:-	u:1822	chr1:165315038:165316104:-	tag:tandem
Gramd3:m4302:t:0	u:37534	chr18:56662495:56662908:+	u:37535	chr18:56662909:56663217:+	tag:tandem
Pfkfb2:m4302:a:0	u:1210	chr1:132593248:132593593:-	u:1207	chr1:132585769:132586370:-	tag:alter
Pfkfb2:m4302:a:1	u:1213	chr1:132594274:132595066:-	u:1207	chr1:132585769:132586370:-	tag:alter
Pfkfb2:m4302:t:0	u:1213	chr1:132594274:132595066:-	u:1210	chr1:132593248:132593593:-	tag:tandem
Msr1:m4302:t:0	u:73440	chr8:40690935:40691325:-	u:73437	chr8:40688806:40690153:-	tag:tandem
Gemin8:m4302:t:0	u:84711	chrX:162627432:162627735:+	u:84712	chrX:162627736:162628443:+	tag:tandem
Gemin5:m4302:t:0	u:9960	chr11:57934788:57935118:-	u:9958	chr11:57933503:57934528:-	tag:tandem
Sppl3:m4302:t:0	u:61098	chr5:115547206:115547729:+	u:61100	chr5:115548264:115548798:+	tag:tandem
Fkbp5:m4302:t:0	u:32300	chr17:28537617:28537991:-	u:32299	chr17:28536040:28537616:-	tag:tandem
Ddx46:m4302:t:0	u:21523	chr13:55780714:55781485:+	u:21524	chr13:55781486:55782617:+	tag:tandem
Fam33a;1110001A07Rik:m4302:t:0	u:13883	chr11:86935752:86936799:+	u:13884	chr11:86936800:86937956:+	tag:tandem
Fam33a;1110001A07Rik:m4302:t:1	u:13883	chr11:86935752:86936799:+	u:13885	chr11:86937957:86938136:+	tag:tandem
Fam33a;1110001A07Rik:m4302:t:2	u:13884	chr11:86936800:86937956:+	u:13885	chr11:86937957:86938136:+	tag:tandem
Hao2:m4302:t:0	u:48748	chr3:98678844:98679231:-	u:48747	chr3:98678627:98678843:-	tag:tandem
Ap1s1:m4302:t:0	u:58993	chr5:137511224:137511425:-	u:58992	chr5:137510864:137511223:-	tag:tandem
Ap1s2:m4302:a:0	u:84691	chrX:160364891:160367486:+	u:84692	chrX:160370112:160371294:+	tag:alter
Evi2b:m4302:t:0	u:10652	chr11:79328518:79328914:-	u:10651	chr11:79326887:79328517:-	tag:tandem
Slc7a1:m4302:t:0	u:59269	chr5:149139889:149144015:-	u:59268	chr5:149138986:149139888:-	tag:tandem
Laptm5;AK171116:m4302:t:0	u:56050	chr4:130490375:130491071:+	u:56052	chr4:130491227:130492062:+	tag:tandem
Scn2b:m4302:t:0	u:80191	chr9:44934387:44936085:+	u:80192	chr9:44936086:44938152:+	tag:tandem
Afg3l1:m4302:t:0	u:77094	chr8:126025696:126026076:+	u:77095	chr8:126026077:126027762:+	tag:tandem
Afg3l2:m4302:t:0	u:36504	chr18:67564577:67564931:-	u:36503	chr18:67564418:67564576:-	tag:tandem
Afg3l2:m4302:a:0	u:36506	chr18:67593505:67593787:-	u:36503	chr18:67564418:67564576:-	tag:alter
Afg3l2:m4302:a:1	u:36506	chr18:67593505:67593787:-	u:36504	chr18:67564577:67564931:-	tag:alter
Nphs2:m4302:t:0	u:4293	chr1:158256269:158257400:+	u:4294	chr1:158257401:158258165:+	tag:tandem
AK139182;Rnf11:m4302:t:0	u:52972	chr4:109124154:109124976:-	u:52969	chr4:109123705:109123907:-	tag:tandem
AK139182;Rnf11:m4302:t:1	u:52973	chr4:109124977:109125155:-	u:52969	chr4:109123705:109123907:-	tag:tandem
AK139182;Rnf11:m4302:t:2	u:52978	chr4:109125568:109126476:-	u:52969	chr4:109123705:109123907:-	tag:tandem
AK139182;Rnf11:m4302:t:3	u:52980	chr4:109126607:109126855:-	u:52969	chr4:109123705:109123907:-	tag:tandem
AK139182;Rnf11:m4302:t:4	u:52973	chr4:109124977:109125155:-	u:52972	chr4:109124154:109124976:-	tag:tandem
AK139182;Rnf11:m4302:t:5	u:52978	chr4:109125568:109126476:-	u:52972	chr4:109124154:109124976:-	tag:tandem
AK139182;Rnf11:m4302:t:6	u:52980	chr4:109126607:109126855:-	u:52972	chr4:109124154:109124976:-	tag:tandem
AK139182;Rnf11:m4302:t:7	u:52978	chr4:109125568:109126476:-	u:52973	chr4:109124977:109125155:-	tag:tandem
AK139182;Rnf11:m4302:t:8	u:52980	chr4:109126607:109126855:-	u:52973	chr4:109124977:109125155:-	tag:tandem
AK139182;Rnf11:m4302:t:9	u:52980	chr4:109126607:109126855:-	u:52978	chr4:109125568:109126476:-	tag:tandem
Yipf3:m4302:t:0	u:35017	chr17:46388663:46388964:+	u:35018	chr17:46388965:46389487:+	tag:tandem
Yipf3:m4302:t:1	u:35017	chr17:46388663:46388964:+	u:35019	chr17:46389488:46389929:+	tag:tandem
Yipf3:m4302:t:2	u:35018	chr17:46388965:46389487:+	u:35019	chr17:46389488:46389929:+	tag:tandem
Yipf5:m4302:t:0	u:36045	chr18:40365084:40365891:-	u:36043	chr18:40363556:40364518:-	tag:tandem
Yipf4:m4302:t:0	u:35408	chr17:74898448:74899311:+	u:35410	chr17:74899617:74900176:+	tag:tandem
Yipf6:m4302:t:0	u:84172	chrX:96138285:96138934:+	u:84173	chrX:96138935:96139373:+	tag:tandem
Yipf6:m4302:t:1	u:84172	chrX:96138285:96138934:+	u:84178	chrX:96141022:96143288:+	tag:tandem
Yipf6:m4302:t:2	u:84173	chrX:96138935:96139373:+	u:84178	chrX:96141022:96143288:+	tag:tandem
2700007P21Rik:m4302:t:0	u:42335	chr2:106803177:106804972:-	u:42334	chr2:106802772:106803176:-	tag:tandem
2700007P21Rik:m4302:a:0	u:42336	chr2:106807864:106809171:-	u:42334	chr2:106802772:106803176:-	tag:alter
2700007P21Rik:m4302:a:1	u:42336	chr2:106807864:106809171:-	u:42335	chr2:106803177:106804972:-	tag:alter
Sgol1:m4302:t:0	u:33041	chr17:53815432:53816028:-	u:33039	chr17:53814111:53815388:-	tag:tandem
Ccr1:m4302:t:0	u:79660	chr9:123877805:123878256:-	u:79659	chr9:123876959:123877804:-	tag:tandem
Ccr2:m4302:a:0	u:81919	chr9:124021545:124023878:+	u:81920	chr9:124027520:124028295:+	tag:alter
Ccr9:m4302:t:0	u:81912	chr9:123689482:123691120:+	u:81913	chr9:123691121:123692574:+	tag:tandem
Rictor:m4302:a:0	u:27393	chr15:6709672:6713576:+	u:27397	chr15:6746236:6747409:+	tag:alter
Rictor:m4302:a:1	u:27393	chr15:6709672:6713576:+	u:27398	chr15:6747410:6750400:+	tag:alter
Rictor:m4302:t:0	u:27397	chr15:6746236:6747409:+	u:27398	chr15:6747410:6750400:+	tag:tandem
Zfp27:m4302:t:0	u:67482	chr7:30678356:30678733:-	u:67481	chr7:30676029:30678355:-	tag:tandem
Wdr37:m4302:t:0	u:19054	chr13:8803272:8804131:-	u:19053	chr13:8802214:8803271:-	tag:tandem
Wdr37:m4302:t:1	u:19055	chr13:8804132:8805060:-	u:19053	chr13:8802214:8803271:-	tag:tandem
Wdr37:m4302:a:0	u:19056	chr13:8849724:8850060:-	u:19053	chr13:8802214:8803271:-	tag:alter
Wdr37:m4302:a:1	u:19057	chr13:8850061:8851916:-	u:19053	chr13:8802214:8803271:-	tag:alter
Wdr37:m4302:a:2	u:19058	chr13:8851917:8852798:-	u:19053	chr13:8802214:8803271:-	tag:alter
Wdr37:m4302:t:2	u:19055	chr13:8804132:8805060:-	u:19054	chr13:8803272:8804131:-	tag:tandem
Wdr37:m4302:a:3	u:19056	chr13:8849724:8850060:-	u:19054	chr13:8803272:8804131:-	tag:alter
Wdr37:m4302:a:4	u:19057	chr13:8850061:8851916:-	u:19054	chr13:8803272:8804131:-	tag:alter
Wdr37:m4302:a:5	u:19058	chr13:8851917:8852798:-	u:19054	chr13:8803272:8804131:-	tag:alter
Wdr37:m4302:a:6	u:19056	chr13:8849724:8850060:-	u:19055	chr13:8804132:8805060:-	tag:alter
Wdr37:m4302:a:7	u:19057	chr13:8850061:8851916:-	u:19055	chr13:8804132:8805060:-	tag:alter
Wdr37:m4302:a:8	u:19058	chr13:8851917:8852798:-	u:19055	chr13:8804132:8805060:-	tag:alter
Wdr37:m4302:t:3	u:19057	chr13:8850061:8851916:-	u:19056	chr13:8849724:8850060:-	tag:tandem
Wdr37:m4302:t:4	u:19058	chr13:8851917:8852798:-	u:19056	chr13:8849724:8850060:-	tag:tandem
Wdr37:m4302:t:5	u:19058	chr13:8851917:8852798:-	u:19057	chr13:8850061:8851916:-	tag:tandem
Wdr33:m4302:a:0	u:37086	chr18:31987388:31988505:+	u:37088	chr18:31993774:31994175:+	tag:alter
Wdr33:m4302:a:1	u:37086	chr18:31987388:31988505:+	u:37089	chr18:31994176:31995088:+	tag:alter
Wdr33:m4302:a:2	u:37086	chr18:31987388:31988505:+	u:37095	chr18:32066596:32066950:+	tag:alter
Wdr33:m4302:a:3	u:37086	chr18:31987388:31988505:+	u:37101	chr18:32068641:32071136:+	tag:alter
Wdr33:m4302:t:0	u:37088	chr18:31993774:31994175:+	u:37089	chr18:31994176:31995088:+	tag:tandem
Wdr33:m4302:a:4	u:37088	chr18:31993774:31994175:+	u:37095	chr18:32066596:32066950:+	tag:alter
Wdr33:m4302:a:5	u:37088	chr18:31993774:31994175:+	u:37101	chr18:32068641:32071136:+	tag:alter
Wdr33:m4302:a:6	u:37089	chr18:31994176:31995088:+	u:37095	chr18:32066596:32066950:+	tag:alter
Wdr33:m4302:a:7	u:37089	chr18:31994176:31995088:+	u:37101	chr18:32068641:32071136:+	tag:alter
Wdr33:m4302:t:1	u:37095	chr18:32066596:32066950:+	u:37101	chr18:32068641:32071136:+	tag:tandem
Ptch1:m4302:a:0	u:20011	chr13:63612840:63613383:-	u:20009	chr13:63609637:63610052:-	tag:alter
Kcnf1:m4302:t:0	u:15209	chr12:17181221:17181506:-	u:15208	chr12:17178906:17181220:-	tag:tandem
Pnrc2:m4302:t:0	u:53624	chr4:135426960:135427173:-	u:53623	chr4:135426831:135426959:-	tag:tandem
Pnrc2:m4302:t:1	u:53626	chr4:135427292:135427400:-	u:53623	chr4:135426831:135426959:-	tag:tandem
Pnrc2:m4302:t:2	u:53626	chr4:135427292:135427400:-	u:53624	chr4:135426960:135427173:-	tag:tandem
Dip2a;mKIAA0184:m4302:t:0	u:5848	chr10:75725788:75727049:-	u:5846	chr10:75723407:75725477:-	tag:tandem
Trabd:m4302:t:0	u:28478	chr15:88916185:88916561:+	u:28481	chr15:88917036:88917504:+	tag:tandem
Cgrrf1:m4302:a:0	u:24713	chr14:47465865:47466262:+	u:24717	chr14:47473871:47474504:+	tag:alter
Rpl7l1:m4302:t:0	u:32931	chr17:46911449:46911748:-	u:32930	chr17:46910850:46911448:-	tag:tandem
Rpl7l1:m4302:t:1	u:32933	chr17:46912049:46912169:-	u:32930	chr17:46910850:46911448:-	tag:tandem
Rpl7l1:m4302:t:2	u:32937	chr17:46912445:46912685:-	u:32930	chr17:46910850:46911448:-	tag:tandem
Rpl7l1:m4302:t:3	u:32933	chr17:46912049:46912169:-	u:32931	chr17:46911449:46911748:-	tag:tandem
Rpl7l1:m4302:t:4	u:32937	chr17:46912445:46912685:-	u:32931	chr17:46911449:46911748:-	tag:tandem
Rpl7l1:m4302:t:5	u:32937	chr17:46912445:46912685:-	u:32933	chr17:46912049:46912169:-	tag:tandem
Pdzd8:m4302:t:0	u:39389	chr19:59370574:59371663:-	u:39388	chr19:59368594:59370573:-	tag:tandem
Pdzd8:m4302:t:1	u:39390	chr19:59371664:59372996:-	u:39388	chr19:59368594:59370573:-	tag:tandem
Pdzd8:m4302:t:2	u:39390	chr19:59371664:59372996:-	u:39389	chr19:59370574:59371663:-	tag:tandem
GODZ;Zdhhc3:m4302:t:0	u:79615	chr9:122983483:122985949:-	u:79614	chr9:122983267:122983482:-	tag:tandem
GODZ;Zdhhc3:m4302:t:1	u:79616	chr9:122985950:122986617:-	u:79614	chr9:122983267:122983482:-	tag:tandem
GODZ;Zdhhc3:m4302:t:2	u:79616	chr9:122985950:122986617:-	u:79615	chr9:122983483:122985949:-	tag:tandem
1300002K09Rik:m4302:t:0	u:54731	chr4:45898271:45899488:+	u:54732	chr4:45899489:45899885:+	tag:tandem
Chsy3:m4302:a:0	u:37567	chr18:59338918:59341674:+	u:37568	chr18:59568537:59570989:+	tag:alter
4933433P14Rik:m4302:t:0	u:18663	chr12:106939084:106939882:+	u:18665	chr12:106940154:106941267:+	tag:tandem
6720463M24Rik:m4302:t:0	u:25580	chr14:99473113:99473325:+	u:25581	chr14:99473326:99473758:+	tag:tandem
Paip2b:m4302:t:0	u:63193	chr6:83756053:83758829:-	u:63192	chr6:83755393:83756052:-	tag:tandem
Dab2:m4302:t:0	u:27378	chr15:6388781:6389463:+	u:27380	chr15:6389631:6390711:+	tag:tandem
Rrbp1:m4302:t:0	u:43019	chr2:143773479:143773626:-	u:43018	chr2:143773131:143773478:-	tag:tandem
Rrbp1:m4302:a:0	u:43020	chr2:143811600:143811701:-	u:43018	chr2:143773131:143773478:-	tag:alter
Rrbp1:m4302:a:1	u:43021	chr2:143811702:143811897:-	u:43018	chr2:143773131:143773478:-	tag:alter
Rrbp1:m4302:a:2	u:43020	chr2:143811600:143811701:-	u:43019	chr2:143773479:143773626:-	tag:alter
Rrbp1:m4302:a:3	u:43021	chr2:143811702:143811897:-	u:43019	chr2:143773479:143773626:-	tag:alter
Rrbp1:m4302:t:1	u:43021	chr2:143811702:143811897:-	u:43020	chr2:143811600:143811701:-	tag:tandem
Nsd1:m4302:t:0	u:21479	chr13:55415389:55417116:+	u:21480	chr13:55417117:55419685:+	tag:tandem
Plxdc2:m4302:t:0	u:44260	chr2:16672934:16673310:+	u:44261	chr2:16673311:16673742:+	tag:tandem
AW555464:m4302:t:0	u:18921	chr12:113983123:113984553:+	u:18922	chr12:113984554:113984801:+	tag:tandem
Peli1:m4302:a:0	u:12282	chr11:21042669:21043007:+	u:12284	chr11:21048526:21049144:+	tag:alter
Peli1:m4302:a:1	u:12282	chr11:21042669:21043007:+	u:12285	chr11:21049145:21049404:+	tag:alter
Peli1:m4302:a:2	u:12282	chr11:21042669:21043007:+	u:12286	chr11:21049405:21050329:+	tag:alter
Peli1:m4302:t:0	u:12284	chr11:21048526:21049144:+	u:12285	chr11:21049145:21049404:+	tag:tandem
Peli1:m4302:t:1	u:12284	chr11:21048526:21049144:+	u:12286	chr11:21049405:21050329:+	tag:tandem
Peli1:m4302:t:2	u:12285	chr11:21049145:21049404:+	u:12286	chr11:21049405:21050329:+	tag:tandem
Peli2:m4302:t:0	u:24739	chr14:48876257:48876495:+	u:24740	chr14:48876496:48880337:+	tag:tandem
Mtap1a:m4302:t:0	u:46225	chr2:121134200:121134674:+	u:46226	chr2:121134675:121135170:+	tag:tandem
Mtap1a:m4302:t:1	u:46225	chr2:121134200:121134674:+	u:46227	chr2:121135171:121136567:+	tag:tandem
Mtap1a:m4302:t:2	u:46226	chr2:121134675:121135170:+	u:46227	chr2:121135171:121136567:+	tag:tandem
Mtap1b:m4302:t:0	u:20531	chr13:100194743:100195739:-	u:20530	chr13:100191419:100194742:-	tag:tandem
Lair1:m4302:t:0	u:66836	chr7:3960698:3961326:-	u:66835	chr7:3958675:3960697:-	tag:tandem
Bub3:m4302:t:0	u:72647	chr7:138714402:138714703:+	u:72648	chr7:138714704:138715411:+	tag:tandem
Large:m4302:t:0	u:73865	chr8:75338498:75339722:-	u:73864	chr8:75336975:75338497:-	tag:tandem
Ablim1:m4302:t:0	u:39345	chr19:57109146:57110851:-	u:39343	chr19:57107754:57108350:-	tag:tandem
Tsc22d3;Tilz3b:m4302:t:0	u:83228	chrX:137074800:137076424:-	u:83227	chrX:137074068:137074799:-	tag:tandem
BC037369:m4302:a:0	u:80931	chr9:72887536:72890182:+	u:80932	chr9:72890238:72890530:+	tag:alter
Rnf38:m4302:t:0	u:52146	chr4:44142294:44142528:-	u:52144	chr4:44139084:44140902:-	tag:tandem
Ankrd17:m4302:t:0	u:57842	chr5:90657899:90658306:-	u:57840	chr5:90657011:90657762:-	tag:tandem
Ankrd12:m4302:t:0	u:33238	chr17:66316837:66319491:-	u:33237	chr17:66314436:66316836:-	tag:tandem
Ankrd12:m4302:a:0	u:33240	chr17:66386138:66386824:-	u:33237	chr17:66314436:66316836:-	tag:alter
Ankrd12:m4302:a:1	u:33240	chr17:66386138:66386824:-	u:33238	chr17:66316837:66319491:-	tag:alter
Ankrd10:m4302:a:0	u:73045	chr8:11614149:11614952:-	u:73044	chr8:11611583:11612483:-	tag:alter
Ankrd10:m4302:a:1	u:73047	chr8:11627669:11628434:-	u:73044	chr8:11611583:11612483:-	tag:alter
Ankrd10:m4302:a:2	u:73047	chr8:11627669:11628434:-	u:73045	chr8:11614149:11614952:-	tag:alter
Ywhaz:m4302:t:0	u:25943	chr15:36700486:36701448:-	u:25942	chr15:36700218:36700485:-	tag:tandem
Ywhaz:m4302:t:1	u:25944	chr15:36701449:36701775:-	u:25942	chr15:36700218:36700485:-	tag:tandem
Ywhaz:m4302:t:2	u:25945	chr15:36701776:36702472:-	u:25942	chr15:36700218:36700485:-	tag:tandem
Ywhaz:m4302:t:3	u:25944	chr15:36701449:36701775:-	u:25943	chr15:36700486:36701448:-	tag:tandem
Ywhaz:m4302:t:4	u:25945	chr15:36701776:36702472:-	u:25943	chr15:36700486:36701448:-	tag:tandem
Ywhaz:m4302:t:5	u:25945	chr15:36701776:36702472:-	u:25944	chr15:36701449:36701775:-	tag:tandem
Spcs3:m4302:t:0	u:73578	chr8:55606243:55607401:-	u:73577	chr8:55605787:55606242:-	tag:tandem
Ywhag:m4302:t:0	u:58963	chr5:136384743:136386191:-	u:58962	chr5:136384411:136384742:-	tag:tandem
Ywhag:m4302:t:1	u:58965	chr5:136386681:136387381:-	u:58962	chr5:136384411:136384742:-	tag:tandem
Ywhag:m4302:t:2	u:58965	chr5:136386681:136387381:-	u:58963	chr5:136384743:136386191:-	tag:tandem
Ywhae:m4302:t:0	u:13486	chr11:75578121:75578667:+	u:13487	chr11:75578668:75579080:+	tag:tandem
Ywhae:m4302:t:1	u:13486	chr11:75578121:75578667:+	u:13489	chr11:75579132:75579345:+	tag:tandem
Ywhae:m4302:t:2	u:13487	chr11:75578668:75579080:+	u:13489	chr11:75579132:75579345:+	tag:tandem
Tmem106b:m4302:t:0	u:64513	chr6:13034326:13035063:+	u:64515	chr6:13035413:13037282:+	tag:tandem
Tmem106b:m4302:t:1	u:64513	chr6:13034326:13035063:+	u:64518	chr6:13037593:13039268:+	tag:tandem
Tmem106b:m4302:t:2	u:64515	chr6:13035413:13037282:+	u:64518	chr6:13037593:13039268:+	tag:tandem
Tmem106a:m4302:t:0	u:14370	chr11:101451767:101452111:+	u:14374	chr11:101452497:101453098:+	tag:tandem
Cdyl:m4302:t:0	u:21208	chr13:35964685:35965492:+	u:21209	chr13:35965493:35965932:+	tag:tandem
Pi16:m4302:t:0	u:34442	chr17:29464895:29465846:+	u:34444	chr17:29466044:29466359:+	tag:tandem
Pi15:m4302:t:0	u:2544	chr1:17615051:17615527:+	u:2545	chr1:17615528:17621019:+	tag:tandem
Hmbox1:m4302:t:0	u:23298	chr14:65431429:65432256:-	u:23297	chr14:65430436:65431428:-	tag:tandem
Hmbox1:m4302:a:0	u:23303	chr14:65502588:65506217:-	u:23297	chr14:65430436:65431428:-	tag:alter
Hmbox1:m4302:a:1	u:23303	chr14:65502588:65506217:-	u:23298	chr14:65431429:65432256:-	tag:alter
Golph3:m4302:t:0	u:27533	chr15:12279122:12280825:+	u:27534	chr15:12280826:12281025:+	tag:tandem
Golph3:m4302:t:1	u:27533	chr15:12279122:12280825:+	u:27535	chr15:12281026:12281345:+	tag:tandem
Golph3:m4302:t:2	u:27534	chr15:12280826:12281025:+	u:27535	chr15:12281026:12281345:+	tag:tandem
BC048355:m4302:t:0	u:35029	chr17:46636022:46636183:+	u:35030	chr17:46636184:46636572:+	tag:tandem
Mff:m4302:t:0	u:3364	chr1:82748355:82748568:+	u:3365	chr1:82748569:82748966:+	tag:tandem
Bcat1:m4302:t:0	u:64323	chr6:144947676:144948782:-	u:64322	chr6:144942355:144947675:-	tag:tandem
Nelf:m4302:a:0	u:44403	chr2:24911703:24912394:+	u:44404	chr2:24917289:24918400:+	tag:alter
Khdrbs1:m4302:t:0	u:53434	chr4:129393110:129393430:-	u:53433	chr4:129392098:129393109:-	tag:tandem
Spats2l:m4302:t:0	u:3003	chr1:58003307:58003808:+	u:3004	chr1:58003809:58005240:+	tag:tandem
2210015D19Rik:m4302:a:0	u:12154	chr11:5680680:5681878:+	u:12156	chr11:5683894:5684719:+	tag:alter
Edem3:m4302:a:0	u:4207	chr1:153632084:153635222:+	u:4208	chr1:153665843:153669198:+	tag:alter
Edem1:m4302:t:0	u:65887	chr6:108805460:108805757:+	u:65890	chr6:108808510:108809349:+	tag:tandem
Edem1:m4302:t:1	u:65887	chr6:108805460:108805757:+	u:65891	chr6:108809350:108811988:+	tag:tandem
Edem1:m4302:t:2	u:65890	chr6:108808510:108809349:+	u:65891	chr6:108809350:108811988:+	tag:tandem
Atp2c1:m4302:t:0	u:79113	chr9:105314913:105315178:-	u:79111	chr9:105313692:105314717:-	tag:tandem
Slmo1:m4302:t:0	u:37768	chr18:67638721:67639072:+	u:37769	chr18:67639073:67639422:+	tag:tandem
Slmo1:m4302:t:1	u:37768	chr18:67638721:67639072:+	u:37771	chr18:67639489:67640236:+	tag:tandem
Slmo1:m4302:t:2	u:37769	chr18:67639073:67639422:+	u:37771	chr18:67639489:67640236:+	tag:tandem
Me2:m4302:a:0	u:36587	chr18:73956104:73957632:-	u:36574	chr18:73929694:73930222:-	tag:alter
Ppp4r1l-ps:m4302:t:0	u:43842	chr2:173405937:173406797:-	u:43841	chr2:173404821:173405936:-	tag:tandem
Ppp4r1l-ps:m4302:a:0	u:43855	chr2:173421599:173422688:-	u:43841	chr2:173404821:173405936:-	tag:alter
Ppp4r1l-ps:m4302:a:1	u:43855	chr2:173421599:173422688:-	u:43842	chr2:173405937:173406797:-	tag:alter
Brms1l:m4302:t:0	u:17765	chr12:56969148:56970215:+	u:17766	chr12:56970216:56970722:+	tag:tandem
Ccdc76:m4302:t:0	u:49072	chr3:116284254:116284528:-	u:49071	chr3:116284012:116284253:-	tag:tandem
Ccdc76:m4302:a:0	u:49074	chr3:116287042:116288188:-	u:49071	chr3:116284012:116284253:-	tag:alter
Ccdc76:m4302:a:1	u:49074	chr3:116287042:116288188:-	u:49072	chr3:116284254:116284528:-	tag:alter
Ccdc77:m4302:t:0	u:63785	chr6:120274716:120275511:-	u:63784	chr6:120274342:120274715:-	tag:tandem
Ccdc77:m4302:a:0	u:63789	chr6:120287791:120288178:-	u:63784	chr6:120274342:120274715:-	tag:alter
Ccdc77:m4302:a:1	u:63789	chr6:120287791:120288178:-	u:63785	chr6:120274716:120275511:-	tag:alter
0610009O20Rik:m4302:a:0	u:37317	chr18:38414453:38415205:+	u:37320	chr18:38421533:38422282:+	tag:alter
Trpc2:m4302:a:0	u:72049	chr7:109227617:109228808:+	u:72051	chr7:109231134:109232277:+	tag:alter
BC016495:m4302:t:0	u:39955	chr19:18725733:18726187:+	u:39956	chr19:18726188:18726417:+	tag:tandem
BC016495:m4302:t:1	u:39955	chr19:18725733:18726187:+	u:39958	chr19:18726674:18726956:+	tag:tandem
BC016495:m4302:t:2	u:39956	chr19:18726188:18726417:+	u:39958	chr19:18726674:18726956:+	tag:tandem
Clstn1:m4302:t:0	u:56493	chr4:149021673:149022007:+	u:56496	chr4:149022165:149023006:+	tag:tandem
Clstn3:m4302:t:0	u:63858	chr6:124381228:124381609:-	u:63857	chr6:124380774:124381227:-	tag:tandem
Tmem135:m4302:t:0	u:68854	chr7:96289032:96290347:-	u:68851	chr7:96288224:96288531:-	tag:tandem
Ndufaf4:m4302:t:0	u:54412	chr4:24829122:24829363:+	u:54415	chr4:24829607:24830645:+	tag:tandem
Arfgap2:m4302:t:0	u:45521	chr2:91115942:91117098:+	u:45522	chr2:91117099:91117527:+	tag:tandem
Arfgap1:m4302:t:0	u:47632	chr2:180716407:180717015:+	u:47633	chr2:180717016:180717162:+	tag:tandem
Sult1d1:m4302:t:0	u:57823	chr5:87984067:87984272:-	u:57822	chr5:87983670:87984066:-	tag:tandem
Sult1d1:m4302:t:1	u:57824	chr5:87984273:87984961:-	u:57822	chr5:87983670:87984066:-	tag:tandem
Sult1d1:m4302:t:2	u:57824	chr5:87984273:87984961:-	u:57823	chr5:87984067:87984272:-	tag:tandem
Med13l:m4302:a:0	u:61215	chr5:119168744:119170115:+	u:61216	chr5:119209338:119213910:+	tag:alter
Med13l:m4302:a:1	u:61215	chr5:119168744:119170115:+	u:61218	chr5:119214850:119215445:+	tag:alter
Med13l:m4302:t:0	u:61216	chr5:119209338:119213910:+	u:61218	chr5:119214850:119215445:+	tag:tandem
Abcc4:m4302:t:0	u:23768	chr14:118882339:118883554:-	u:23767	chr14:118881994:118882338:-	tag:tandem
Asah2:m4302:a:0	u:38874	chr19:32115962:32117945:-	u:38868	chr19:32059141:32059554:-	tag:alter
BC004004:m4302:t:0	u:34440	chr17:29438395:29438469:+	u:34441	chr17:29438470:29439831:+	tag:tandem
Hs6st2:m4302:a:0	u:82560	chrX:49029960:49033062:-	u:82559	chrX:48740389:48742646:-	tag:alter
Alcam:m4302:t:0	u:29706	chr16:52250829:52251562:-	u:29705	chr16:52249187:52250828:-	tag:tandem
Prpf40a:m4302:t:0	u:41693	chr2:52996142:52997179:-	u:41691	chr2:52994748:52995878:-	tag:tandem
Prpf40a:m4302:t:1	u:41696	chr2:52997509:52998048:-	u:41691	chr2:52994748:52995878:-	tag:tandem
Prpf40a:m4302:t:2	u:41696	chr2:52997509:52998048:-	u:41693	chr2:52996142:52997179:-	tag:tandem
Gfod1:m4302:t:0	u:19590	chr13:43290888:43295693:-	u:19589	chr13:43290615:43290887:-	tag:tandem
Gfod1:m4302:a:0	u:19591	chr13:43360794:43361073:-	u:19589	chr13:43290615:43290887:-	tag:alter
Gfod1:m4302:a:1	u:19591	chr13:43360794:43361073:-	u:19590	chr13:43290888:43295693:-	tag:alter
Daam1;mKIAA0666:m4302:t:0	u:17946	chr12:73090875:73090960:+	u:17949	chr12:73092076:73093151:+	tag:tandem
Mfap3l:m4302:t:0	u:75680	chr8:63150752:63151550:+	u:75682	chr8:63154907:63155480:+	tag:tandem
Esrp2:m4302:t:0	u:74409	chr8:108654533:108655081:-	u:74406	chr8:108652470:108654210:-	tag:tandem
Sesn2:m4302:t:0	u:53510	chr4:132048722:132049075:-	u:53509	chr4:132047938:132048721:-	tag:tandem
Sesn2:m4302:t:1	u:53511	chr4:132049076:132049630:-	u:53509	chr4:132047938:132048721:-	tag:tandem
Sesn2:m4302:t:2	u:53511	chr4:132049076:132049630:-	u:53510	chr4:132048722:132049075:-	tag:tandem
Tomm70a:m4302:t:0	u:31143	chr16:57152849:57153145:+	u:31145	chr16:57154065:57154382:+	tag:tandem
Tomm70a:m4302:t:1	u:31143	chr16:57152849:57153145:+	u:31146	chr16:57154383:57154644:+	tag:tandem
Tomm70a:m4302:t:2	u:31143	chr16:57152849:57153145:+	u:31147	chr16:57154645:57156818:+	tag:tandem
Tomm70a:m4302:t:3	u:31145	chr16:57154065:57154382:+	u:31146	chr16:57154383:57154644:+	tag:tandem
Tomm70a:m4302:t:4	u:31145	chr16:57154065:57154382:+	u:31147	chr16:57154645:57156818:+	tag:tandem
Tomm70a:m4302:t:5	u:31146	chr16:57154383:57154644:+	u:31147	chr16:57154645:57156818:+	tag:tandem
Osgin2:m4302:a:0	u:51820	chr4:15929691:15932470:-	u:51818	chr4:15924372:15925060:-	tag:alter
1600029D21Rik:m4302:t:0	u:80323	chr9:50312650:50313239:+	u:80324	chr9:50313240:50313743:+	tag:tandem
Zadh2:m4302:t:0	u:37988	chr18:84264726:84266606:+	u:37989	chr18:84266607:84266784:+	tag:tandem
Rc3h2:m4302:t:0	u:41537	chr2:37228661:37230919:-	u:41536	chr2:37225591:37228660:-	tag:tandem
3110057O12Rik:m4302:a:0	u:49934	chr3:40720989:40721333:+	u:49936	chr3:40739729:40740230:+	tag:alter
3110057O12Rik:m4302:a:1	u:49934	chr3:40720989:40721333:+	u:49937	chr3:40740231:40742059:+	tag:alter
3110057O12Rik:m4302:t:0	u:49936	chr3:40739729:40740230:+	u:49937	chr3:40740231:40742059:+	tag:tandem
Dido1:m4302:t:0	u:43987	chr2:180393057:180394043:-	u:43986	chr2:180392669:180393056:-	tag:tandem
Dido1:m4302:a:0	u:43988	chr2:180400640:180402992:-	u:43986	chr2:180392669:180393056:-	tag:alter
Dido1:m4302:a:1	u:43989	chr2:180402993:180404069:-	u:43986	chr2:180392669:180393056:-	tag:alter
Dido1:m4302:a:2	u:43992	chr2:180415764:180417835:-	u:43986	chr2:180392669:180393056:-	tag:alter
Dido1:m4302:a:3	u:43988	chr2:180400640:180402992:-	u:43987	chr2:180393057:180394043:-	tag:alter
Dido1:m4302:a:4	u:43989	chr2:180402993:180404069:-	u:43987	chr2:180393057:180394043:-	tag:alter
Dido1:m4302:a:5	u:43992	chr2:180415764:180417835:-	u:43987	chr2:180393057:180394043:-	tag:alter
Dido1:m4302:t:1	u:43989	chr2:180402993:180404069:-	u:43988	chr2:180400640:180402992:-	tag:tandem
Dido1:m4302:a:6	u:43992	chr2:180415764:180417835:-	u:43988	chr2:180400640:180402992:-	tag:alter
Dido1:m4302:a:7	u:43992	chr2:180415764:180417835:-	u:43989	chr2:180402993:180404069:-	tag:alter
0610007P08Rik:m4302:a:0	u:21631	chr13:63970492:63970962:+	u:21633	chr13:64001154:64001609:+	tag:alter
Ksr1:m4302:t:0	u:10639	chr11:78828303:78829686:-	u:10638	chr11:78827047:78828302:-	tag:tandem
Rasgrf1:m4302:a:0	u:81147	chr9:89810445:89810684:+	u:81149	chr9:89921601:89921816:+	tag:alter
Actr3b:m4302:t:0	u:59738	chr5:25355764:25356159:+	u:59740	chr5:25356223:25356506:+	tag:tandem
Qtrtd1:m4302:t:0	u:29610	chr16:43862049:43863414:-	u:29609	chr16:43861526:43862048:-	tag:tandem
Actr3:m4302:t:0	u:1161	chr1:127289817:127290571:-	u:1160	chr1:127289483:127289816:-	tag:tandem
Actr2:m4302:a:0	u:9416	chr11:19978689:19979767:-	u:9412	chr11:19962811:19963603:-	tag:alter
Galnt10:m4302:a:0	u:12822	chr11:57539167:57540074:+	u:12823	chr11:57598230:57599558:+	tag:alter
Galnt10:m4302:a:1	u:12822	chr11:57539167:57540074:+	u:12824	chr11:57599559:57601002:+	tag:alter
Galnt10:m4302:t:0	u:12823	chr11:57598230:57599558:+	u:12824	chr11:57599559:57601002:+	tag:tandem
AK209647:m4302:t:0	u:84635	chrX:155825208:155825607:+	u:84637	chrX:155825933:155827548:+	tag:tandem
Magi3:m4302:t:0	u:48821	chr3:103819177:103819991:-	u:48820	chr3:103817251:103819176:-	tag:tandem
Magi1:m4302:t:0	u:63431	chr6:93628029:93628939:-	u:63430	chr6:93626642:93628028:-	tag:tandem
Magi1:m4302:a:0	u:63432	chr6:93631470:93632945:-	u:63430	chr6:93626642:93628028:-	tag:alter
Magi1:m4302:a:1	u:63432	chr6:93631470:93632945:-	u:63431	chr6:93628029:93628939:-	tag:alter
Chek1:m4302:t:0	u:77635	chr9:36517025:36517190:-	u:77634	chr9:36516067:36517024:-	tag:tandem
Chek1:m4302:t:1	u:77636	chr9:36517191:36517509:-	u:77634	chr9:36516067:36517024:-	tag:tandem
Chek1:m4302:t:2	u:77637	chr9:36517510:36517919:-	u:77634	chr9:36516067:36517024:-	tag:tandem
Chek1:m4302:t:3	u:77636	chr9:36517191:36517509:-	u:77635	chr9:36517025:36517190:-	tag:tandem
Chek1:m4302:t:4	u:77637	chr9:36517510:36517919:-	u:77635	chr9:36517025:36517190:-	tag:tandem
Chek1:m4302:t:5	u:77637	chr9:36517510:36517919:-	u:77636	chr9:36517191:36517509:-	tag:tandem
Frmd4b:m4302:t:0	u:63496	chr6:97237074:97238353:-	u:63495	chr6:97236861:97237073:-	tag:tandem
Frmd4b:m4302:a:0	u:63497	chr6:97300927:97303171:-	u:63495	chr6:97236861:97237073:-	tag:alter
Frmd4b:m4302:a:1	u:63497	chr6:97300927:97303171:-	u:63496	chr6:97237074:97238353:-	tag:alter
Slco1a1:m4302:t:0	u:64252	chr6:141856810:141857287:-	u:64250	chr6:141855802:141856745:-	tag:tandem
Slco1a1:m4302:t:1	u:64253	chr6:141857288:141857651:-	u:64250	chr6:141855802:141856745:-	tag:tandem
Slco1a1:m4302:t:2	u:64253	chr6:141857288:141857651:-	u:64252	chr6:141856810:141857287:-	tag:tandem
Utp23:m4302:t:0	u:27706	chr15:51714061:51714241:+	u:27708	chr15:51715519:51715862:+	tag:tandem
Utp23:m4302:t:1	u:27706	chr15:51714061:51714241:+	u:27709	chr15:51715863:51716167:+	tag:tandem
Utp23:m4302:t:2	u:27708	chr15:51715519:51715862:+	u:27709	chr15:51715863:51716167:+	tag:tandem
Lrrc49:m4302:a:0	u:78335	chr9:60435044:60435698:-	u:78334	chr9:60416979:60418405:-	tag:alter
Zbtb7a:m4302:t:0	u:8228	chr10:80611252:80612121:+	u:8229	chr10:80612122:80612334:+	tag:tandem
Zbtb7c:m4302:t:0	u:37894	chr18:76305334:76306377:+	u:37895	chr18:76306378:76307795:+	tag:tandem
Zbtb7b:m4302:t:0	u:48476	chr3:89183316:89183447:-	u:48473	chr3:89181568:89183070:-	tag:tandem
Cbx8:m4302:t:0	u:11901	chr11:118899750:118899990:-	u:11900	chr11:118897618:118899749:-	tag:tandem
Cbx7:m4302:t:0	u:26681	chr15:79747712:79751546:-	u:26680	chr15:79746231:79747711:-	tag:tandem
Cbx6:m4302:t:0	u:26676	chr15:79656571:79657725:-	u:26675	chr15:79654328:79656570:-	tag:tandem
Cbx5:m4302:t:0	u:27309	chr15:103028610:103029297:-	u:27307	chr15:103021977:103028356:-	tag:tandem
Cbx5:m4302:t:1	u:27311	chr15:103029350:103029679:-	u:27307	chr15:103021977:103028356:-	tag:tandem
Cbx5:m4302:t:2	u:27311	chr15:103029350:103029679:-	u:27309	chr15:103028610:103029297:-	tag:tandem
Cbx4:m4302:t:0	u:11903	chr11:118941469:118941737:-	u:11902	chr11:118938885:118941468:-	tag:tandem
Cbx4:m4302:t:1	u:11904	chr11:118941738:118942205:-	u:11902	chr11:118938885:118941468:-	tag:tandem
Cbx4:m4302:t:2	u:11904	chr11:118941738:118942205:-	u:11903	chr11:118941469:118941737:-	tag:tandem
Slc43a2:m4302:t:0	u:13456	chr11:75386290:75387292:+	u:13457	chr11:75387293:75388542:+	tag:tandem
Slc43a2:m4302:t:1	u:13456	chr11:75386290:75387292:+	u:13458	chr11:75388543:75391079:+	tag:tandem
Slc43a2:m4302:t:2	u:13457	chr11:75387293:75388542:+	u:13458	chr11:75388543:75391079:+	tag:tandem
Trappc6a:m4302:a:0	u:70508	chr7:20094077:20094626:+	u:70513	chr7:20101194:20101493:+	tag:alter
Sprn:m4302:t:0	u:69963	chr7:147338554:147339112:-	u:69962	chr7:147336835:147338553:-	tag:tandem
Slc44a2:m4302:t:0	u:79866	chr9:21158125:21159075:+	u:79867	chr9:21159076:21159471:+	tag:tandem
Rorb:m4302:t:0	u:38689	chr19:19012148:19012369:-	u:38687	chr19:19011058:19012045:-	tag:tandem
Uevld:m4302:a:0	u:68170	chr7:54201371:54203418:-	u:68161	chr7:54178909:54181420:-	tag:alter
mKIAA0267;Slc9a6:m4302:t:0	u:83898	chrX:53914352:53914934:+	u:83899	chrX:53914935:53917013:+	tag:tandem
Copa:m4302:a:0	u:4517	chr1:174021375:174023690:+	u:4519	chr1:174051890:174052246:+	tag:alter
Spon2:m4302:t:0	u:57241	chr5:33556576:33557116:-	u:57240	chr5:33556167:33556575:-	tag:tandem
Crebzf;BC051589:m4302:t:0	u:71866	chr7:97592187:97593963:+	u:71867	chr7:97593964:97594613:+	tag:tandem
Crebzf;BC051589:m4302:t:1	u:71866	chr7:97592187:97593963:+	u:71868	chr7:97594614:97595253:+	tag:tandem
Crebzf;BC051589:m4302:t:2	u:71866	chr7:97592187:97593963:+	u:71869	chr7:97595254:97596231:+	tag:tandem
Crebzf;BC051589:m4302:t:3	u:71867	chr7:97593964:97594613:+	u:71868	chr7:97594614:97595253:+	tag:tandem
Crebzf;BC051589:m4302:t:4	u:71867	chr7:97593964:97594613:+	u:71869	chr7:97595254:97596231:+	tag:tandem
Crebzf;BC051589:m4302:t:5	u:71868	chr7:97594614:97595253:+	u:71869	chr7:97595254:97596231:+	tag:tandem
Kpnb1:m4302:t:0	u:11027	chr11:97022927:97023103:-	u:11025	chr11:97021024:97022845:-	tag:tandem
Kpnb1:m4302:t:1	u:11028	chr11:97023104:97023352:-	u:11025	chr11:97021024:97022845:-	tag:tandem
Kpnb1:m4302:t:2	u:11028	chr11:97023104:97023352:-	u:11027	chr11:97022927:97023103:-	tag:tandem
Cdk12:m4302:a:0	u:14193	chr11:98106530:98108017:+	u:14194	chr11:98111023:98112361:+	tag:alter
Cdk12:m4302:a:1	u:14193	chr11:98106530:98108017:+	u:14195	chr11:98112362:98114853:+	tag:alter
Cdk12:m4302:t:0	u:14194	chr11:98111023:98112361:+	u:14195	chr11:98112362:98114853:+	tag:tandem
Cdk17:m4302:t:0	u:8531	chr10:92703115:92703588:+	u:8532	chr10:92703589:92704022:+	tag:tandem
BC106167:m4302:t:0	u:50376	chr3:87973639:87973843:+	u:50378	chr3:87975545:87976011:+	tag:tandem
Prpf4b:m4302:t:0	u:21186	chr13:34993261:34994543:+	u:21187	chr13:34994544:34994746:+	tag:tandem
Prpf4b:m4302:a:0	u:21186	chr13:34993261:34994543:+	u:21190	chr13:34997751:34997932:+	tag:alter
Prpf4b:m4302:a:1	u:21187	chr13:34994544:34994746:+	u:21190	chr13:34997751:34997932:+	tag:alter
Nudt12:m4302:t:0	u:33182	chr17:59139721:59140823:-	u:33181	chr17:59139530:59139720:-	tag:tandem
Nudt13:m4302:t:0	u:24155	chr14:21135245:21135745:+	u:24156	chr14:21135746:21135983:+	tag:tandem
Nudt13:m4302:t:1	u:24155	chr14:21135245:21135745:+	u:24157	chr14:21135984:21136804:+	tag:tandem
Nudt13:m4302:t:2	u:24156	chr14:21135746:21135983:+	u:24157	chr14:21135984:21136804:+	tag:tandem
Slc14a1:m4302:t:0	u:36647	chr18:78298382:78299133:-	u:36646	chr18:78296830:78298381:-	tag:tandem
Ppp1r11:m4302:t:0	u:32793	chr17:37085640:37086235:-	u:32792	chr17:37085300:37085639:-	tag:tandem
Alkbh5:m4302:t:0	u:12945	chr11:60368274:60369406:+	u:12946	chr11:60369407:60372014:+	tag:tandem
Alkbh1:m4302:t:0	u:16040	chr12:88769006:88770220:-	u:16039	chr12:88767145:88769005:-	tag:tandem
Zkscan1:m4302:t:0	u:61813	chr5:138542710:138545143:+	u:61814	chr5:138545144:138545573:+	tag:tandem
Zkscan1:m4302:t:1	u:61813	chr5:138542710:138545143:+	u:61815	chr5:138545574:138545718:+	tag:tandem
Zkscan1:m4302:t:2	u:61813	chr5:138542710:138545143:+	u:61817	chr5:138545893:138549049:+	tag:tandem
Zkscan1:m4302:t:3	u:61814	chr5:138545144:138545573:+	u:61815	chr5:138545574:138545718:+	tag:tandem
Zkscan1:m4302:t:4	u:61814	chr5:138545144:138545573:+	u:61817	chr5:138545893:138549049:+	tag:tandem
Zkscan1:m4302:t:5	u:61815	chr5:138545574:138545718:+	u:61817	chr5:138545893:138549049:+	tag:tandem
Zkscan6:m4302:t:0	u:13051	chr11:65642328:65642524:+	u:13052	chr11:65642525:65642742:+	tag:tandem
Slc13a1:m4302:a:0	u:62270	chr6:24084842:24087044:-	u:62269	chr6:24038547:24038964:-	tag:alter
Taf7:m4302:t:0	u:36006	chr18:37801676:37802140:-	u:36005	chr18:37800145:37801675:-	tag:tandem
4933411K20Rik:m4302:t:0	u:75564	chr8:47278066:47280505:+	u:75565	chr8:47280506:47280855:+	tag:tandem
Taf9:m4302:t:0	u:22049	chr13:101425800:101425950:+	u:22050	chr13:101425951:101426014:+	tag:tandem
Taf9:m4302:a:0	u:22049	chr13:101425800:101425950:+	u:22051	chr13:101435974:101436313:+	tag:alter
Taf9:m4302:a:1	u:22050	chr13:101425951:101426014:+	u:22051	chr13:101435974:101436313:+	tag:alter
Map2k3:m4302:a:0	u:12967	chr11:60760612:60761092:+	u:12970	chr11:60765265:60766312:+	tag:alter
Map2k2:m4302:t:0	u:8225	chr10:80586627:80587083:+	u:8226	chr10:80587084:80587441:+	tag:tandem
Map2k1:m4302:t:0	u:78415	chr9:64033966:64034359:-	u:78414	chr9:64033564:64033965:-	tag:tandem
Map2k4:m4302:t:0	u:10151	chr11:65502052:65503532:-	u:10150	chr11:65501850:65502051:-	tag:tandem
Oaz2-ps;Oaz2:m4302:t:0	u:80694	chr9:65536901:65537264:+	u:80695	chr9:65537265:65538106:+	tag:tandem
Tbl2:m4302:t:0	u:61639	chr5:135635695:135638536:+	u:61640	chr5:135638537:135639743:+	tag:tandem
Elm1;Wisp1:m4302:t:0	u:27879	chr15:66750716:66751634:+	u:27880	chr15:66751635:66754760:+	tag:tandem
Med1:m4302:t:0	u:11084	chr11:98013918:98014118:-	u:11083	chr11:98013469:98013917:-	tag:tandem
Med1:m4302:a:0	u:11087	chr11:98015069:98016554:-	u:11083	chr11:98013469:98013917:-	tag:alter
Med1:m4302:a:1	u:11087	chr11:98015069:98016554:-	u:11084	chr11:98013918:98014118:-	tag:alter
Med9:m4302:t:0	u:12915	chr11:59774277:59774624:+	u:12916	chr11:59774625:59775705:+	tag:tandem
Fasn:m4302:t:0	u:12019	chr11:120668840:120669167:-	u:12018	chr11:120668390:120668839:-	tag:tandem
1200014J11Rik:m4302:a:0	u:13342	chr11:72867161:72870238:+	u:13344	chr11:72892989:72893589:+	tag:alter
AKAP95;Akap8:m4302:t:0	u:32406	chr17:32441929:32442651:-	u:32404	chr17:32440700:32441637:-	tag:tandem
4930471M23Rik:m4302:t:0	u:59821	chr5:30960559:30960992:+	u:59822	chr5:30960993:30962051:+	tag:tandem
Lss:m4302:t:0	u:7984	chr10:76015813:76016436:+	u:7985	chr10:76016437:76016680:+	tag:tandem
Tmtc1:m4302:t:0	u:64378	chr6:148185111:148185753:-	u:64377	chr6:148180952:148185110:-	tag:tandem
Scly:m4302:a:0	u:3586	chr1:93206484:93207906:+	u:3587	chr1:93216807:93217656:+	tag:alter
Timm22:m4302:t:0	u:13503	chr11:76227624:76227813:+	u:13508	chr11:76229225:76229813:+	tag:tandem
Ndst1:m4302:t:0	u:36194	chr18:60845630:60847920:-	u:36192	chr18:60844149:60845307:-	tag:tandem
Ndst2:m4302:t:0	u:22517	chr14:21543257:21543456:-	u:22516	chr14:21542952:21543256:-	tag:tandem
Chmp1b:m4302:t:0	u:37755	chr18:67366006:67366404:+	u:37756	chr18:67366405:67366654:+	tag:tandem
Chmp1b:m4302:t:1	u:37755	chr18:67366006:67366404:+	u:37757	chr18:67366655:67367465:+	tag:tandem
Chmp1b:m4302:t:2	u:37756	chr18:67366405:67366654:+	u:37757	chr18:67366655:67367465:+	tag:tandem
Ube2q1:m4302:t:0	u:50510	chr3:89586210:89586664:+	u:50511	chr3:89586665:89587921:+	tag:tandem
Ildr2:m4302:t:0	u:4436	chr1:168240921:168242429:+	u:4437	chr1:168242430:168246962:+	tag:tandem
Gart:m4302:t:0	u:29987	chr16:91633837:91634115:-	u:29986	chr16:91633650:91633836:-	tag:tandem
Pick1:m4302:t:0	u:28243	chr15:79079422:79079540:+	u:28244	chr15:79079541:79079895:+	tag:tandem
Jmy:m4302:t:0	u:20387	chr13:94204157:94205374:-	u:20386	chr13:94203843:94204156:-	tag:tandem
Sin3a:m4302:t:0	u:80441	chr9:56975185:56975708:+	u:80442	chr9:56975709:56975958:+	tag:tandem
Abi2:m4302:t:0	u:3114	chr1:60533759:60536550:+	u:3115	chr1:60536551:60538006:+	tag:tandem
Abi2:m4302:t:1	u:3114	chr1:60533759:60536550:+	u:3116	chr1:60538007:60538785:+	tag:tandem
Abi2:m4302:t:2	u:3115	chr1:60536551:60538006:+	u:3116	chr1:60538007:60538785:+	tag:tandem
Abi1:m4302:t:0	u:41087	chr2:22796052:22796752:-	u:41085	chr2:22795596:22795878:-	tag:tandem
Abi1:m4302:t:1	u:41088	chr2:22796753:22797391:-	u:41085	chr2:22795596:22795878:-	tag:tandem
Abi1:m4302:t:2	u:41088	chr2:22796753:22797391:-	u:41087	chr2:22796052:22796752:-	tag:tandem
Tor3a:m4302:t:0	u:1703	chr1:158584708:158584806:-	u:1702	chr1:158583748:158584707:-	tag:tandem
Tor3a:m4302:t:1	u:1704	chr1:158584807:158585150:-	u:1702	chr1:158583748:158584707:-	tag:tandem
Tor3a:m4302:t:2	u:1705	chr1:158585151:158585457:-	u:1702	chr1:158583748:158584707:-	tag:tandem
Tor3a:m4302:t:3	u:1706	chr1:158585458:158586074:-	u:1702	chr1:158583748:158584707:-	tag:tandem
Tor3a:m4302:t:4	u:1704	chr1:158584807:158585150:-	u:1703	chr1:158584708:158584806:-	tag:tandem
Tor3a:m4302:t:5	u:1705	chr1:158585151:158585457:-	u:1703	chr1:158584708:158584806:-	tag:tandem
Tor3a:m4302:t:6	u:1706	chr1:158585458:158586074:-	u:1703	chr1:158584708:158584806:-	tag:tandem
Tor3a:m4302:t:7	u:1705	chr1:158585151:158585457:-	u:1704	chr1:158584807:158585150:-	tag:tandem
Tor3a:m4302:t:8	u:1706	chr1:158585458:158586074:-	u:1704	chr1:158584807:158585150:-	tag:tandem
Tor3a:m4302:t:9	u:1706	chr1:158585458:158586074:-	u:1705	chr1:158585151:158585457:-	tag:tandem
Lrrtm4:m4302:a:0	u:65500	chr6:79973160:79974925:+	u:65501	chr6:80759183:80760136:+	tag:alter
Lrrtm1:m4302:t:0	u:65489	chr6:77193496:77195336:+	u:65490	chr6:77195337:77195510:+	tag:tandem
Lrrtm1:m4302:a:0	u:65489	chr6:77193496:77195336:+	u:65491	chr6:77207305:77207784:+	tag:alter
Lrrtm1:m4302:a:1	u:65490	chr6:77195337:77195510:+	u:65491	chr6:77207305:77207784:+	tag:alter
Lrrtm3:m4302:t:0	u:5680	chr10:63392007:63392615:-	u:5679	chr10:63391245:63392006:-	tag:tandem
Lrrtm3:m4302:a:0	u:5682	chr10:63550244:63550589:-	u:5679	chr10:63391245:63392006:-	tag:alter
Lrrtm3:m4302:a:1	u:5682	chr10:63550244:63550589:-	u:5680	chr10:63392007:63392615:-	tag:alter
Rprm:m4302:t:0	u:41701	chr2:53936818:53937385:-	u:41700	chr2:53936504:53936817:-	tag:tandem
Gpr26:m4302:t:0	u:72650	chr7:139175999:139176632:+	u:72651	chr7:139176633:139177315:+	tag:tandem
Rhou:m4302:t:0	u:77104	chr8:126185835:126186811:+	u:77105	chr8:126186812:126187781:+	tag:tandem
Rhoh:m4302:t:0	u:60304	chr5:66284203:66284546:+	u:60307	chr5:66284823:66287938:+	tag:tandem
Dlg5:m4302:t:0	u:22553	chr14:24954473:24954822:-	u:22552	chr14:24953175:24954472:-	tag:tandem
Ctnna1:m4302:t:0	u:37196	chr18:35413546:35414029:+	u:37197	chr18:35414030:35414429:+	tag:tandem
Ly86:m4302:t:0	u:21213	chr13:37510491:37510687:+	u:21214	chr13:37510688:37510904:+	tag:tandem
Dbndd2:m4302:t:0	u:47243	chr2:164315635:164316265:+	u:47244	chr2:164316266:164318822:+	tag:tandem
Kmo:m4302:t:0	u:4621	chr1:177590279:177590804:+	u:4622	chr1:177590805:177590983:+	tag:tandem
Tcf7l2:m4302:t:0	u:40706	chr19:56005923:56006882:+	u:40707	chr19:56006883:56007716:+	tag:tandem
Kcns2:m4302:t:0	u:27634	chr15:34769681:34772091:+	u:27635	chr15:34772092:34773019:+	tag:tandem
Ahsa2:m4302:t:0	u:9472	chr11:23390062:23390226:-	u:9471	chr11:23389732:23390061:-	tag:tandem
Thap2:m4302:t:0	u:6645	chr10:114808757:114809137:-	u:6643	chr10:114805456:114807021:-	tag:tandem
Thap2:m4302:t:1	u:6647	chr10:114809216:114810002:-	u:6643	chr10:114805456:114807021:-	tag:tandem
Thap2:m4302:t:2	u:6647	chr10:114809216:114810002:-	u:6645	chr10:114808757:114809137:-	tag:tandem
Thap4:m4302:a:0	u:1039	chr1:95621226:95621893:-	u:1036	chr1:95601968:95602232:-	tag:alter
Thap4:m4302:a:1	u:1040	chr1:95645796:95647562:-	u:1036	chr1:95601968:95602232:-	tag:alter
Thap4:m4302:a:2	u:1040	chr1:95645796:95647562:-	u:1039	chr1:95621226:95621893:-	tag:alter
Thap6:m4302:a:0	u:60627	chr5:92395477:92395623:+	u:60628	chr5:92398566:92401168:+	tag:alter
Sec23ip:m4302:t:0	u:72597	chr7:135926941:135927307:+	u:72598	chr7:135927308:135928349:+	tag:tandem
D930015E06Rik:m4302:a:0	u:48322	chr3:83834237:83835526:-	u:48320	chr3:83725287:83725802:-	tag:alter
6230409E13Rik:m4302:a:0	u:54393	chr4:21875838:21878035:+	u:54395	chr4:21920444:21923985:+	tag:alter
6230409E13Rik:m4302:a:1	u:54393	chr4:21875838:21878035:+	u:54396	chr4:21923986:21928607:+	tag:alter
6230409E13Rik:m4302:t:0	u:54395	chr4:21920444:21923985:+	u:54396	chr4:21923986:21928607:+	tag:tandem
Nt5c2:m4302:t:0	u:39195	chr19:46961321:46962153:-	u:39194	chr19:46959879:46961320:-	tag:tandem
Nt5c2:m4302:t:1	u:39198	chr19:46962316:46962841:-	u:39194	chr19:46959879:46961320:-	tag:tandem
Nt5c2:m4302:t:2	u:39198	chr19:46962316:46962841:-	u:39195	chr19:46961321:46962153:-	tag:tandem
Txndc9:m4302:t:0	u:322	chr1:38044380:38044506:-	u:317	chr1:38042034:38043756:-	tag:tandem
Nxph1:m4302:t:0	u:64506	chr6:9197846:9198577:+	u:64507	chr6:9198578:9199022:+	tag:tandem
Txndc5:m4302:t:0	u:19548	chr13:38592893:38593193:-	u:19547	chr13:38592142:38592892:-	tag:tandem
Txndc5:m4302:t:1	u:19549	chr13:38593194:38593454:-	u:19547	chr13:38592142:38592892:-	tag:tandem
Txndc5:m4302:t:2	u:19549	chr13:38593194:38593454:-	u:19548	chr13:38592893:38593193:-	tag:tandem
Pdcd1lg2:m4302:t:0	u:40135	chr19:29545005:29545370:+	u:40136	chr19:29545371:29545650:+	tag:tandem
Ent3;Slc29a3:m4302:t:0	u:5553	chr10:60177369:60179238:-	u:5552	chr10:60174820:60177368:-	tag:tandem
Mkrn2:m4302:t:0	u:65982	chr6:115567749:115568013:+	u:65984	chr6:115568066:115568507:+	tag:tandem
Mkrn2:m4302:t:1	u:65982	chr6:115567749:115568013:+	u:65986	chr6:115568701:115571339:+	tag:tandem
Mkrn2:m4302:t:2	u:65984	chr6:115568066:115568507:+	u:65986	chr6:115568701:115571339:+	tag:tandem
Sectm1b:m4302:t:0	u:12033	chr11:120915845:120916188:-	u:12032	chr11:120914737:120915844:-	tag:tandem
AB346227:m4302:t:0	u:53310	chr4:126013213:126015411:-	u:53308	chr4:126010838:126012016:-	tag:tandem
Nup133:m4302:a:0	u:74863	chr8:126443736:126444705:-	u:74861	chr8:126421420:126423183:-	tag:alter
Hfe:m4302:t:0	u:19327	chr13:23795679:23796254:-	u:19325	chr13:23793903:23795430:-	tag:tandem
Baz2a:m4302:t:0	u:9022	chr10:127563809:127564272:+	u:9025	chr10:127565638:127566359:+	tag:tandem
Sh3gl2:m4302:t:0	u:55069	chr4:85033657:85034952:+	u:55070	chr4:85034953:85035282:+	tag:tandem
Letm1:m4302:t:0	u:57251	chr5:34084001:34084967:-	u:57250	chr5:34082323:34084000:-	tag:tandem
Mmd:m4302:t:0	u:13982	chr11:90138722:90139318:+	u:13983	chr11:90139319:90139827:+	tag:tandem
Adcy1:m4302:t:0	u:12198	chr11:7072882:7074298:+	u:12200	chr11:7075533:7078507:+	tag:tandem
Adcy9:m4302:t:0	u:28851	chr16:4287545:4287897:-	u:28850	chr16:4284888:4287544:-	tag:tandem
Slc7a6:m4302:t:0	u:76696	chr8:108720651:108721815:+	u:76698	chr8:108721921:108722603:+	tag:tandem
Slc7a6:m4302:t:1	u:76696	chr8:108720651:108721815:+	u:76699	chr8:108722604:108724383:+	tag:tandem
Slc7a6:m4302:t:2	u:76698	chr8:108721921:108722603:+	u:76699	chr8:108722604:108724383:+	tag:tandem
Slc7a5:m4302:t:0	u:74719	chr8:124405334:124406939:-	u:74718	chr8:124405046:124405333:-	tag:tandem
Slc7a2:m4302:t:0	u:75517	chr8:42001888:42003234:+	u:75518	chr8:42003235:42003417:+	tag:tandem
Slc7a2:m4302:t:1	u:75517	chr8:42001888:42003234:+	u:75519	chr8:42003418:42007424:+	tag:tandem
Slc7a2:m4302:t:2	u:75518	chr8:42003235:42003417:+	u:75519	chr8:42003418:42007424:+	tag:tandem
Psmd5:m4302:t:0	u:41491	chr2:34706205:34707601:-	u:41490	chr2:34705838:34706204:-	tag:tandem
Psmd5:m4302:t:1	u:41493	chr2:34707808:34708312:-	u:41490	chr2:34705838:34706204:-	tag:tandem
Psmd5:m4302:t:2	u:41493	chr2:34707808:34708312:-	u:41491	chr2:34706205:34707601:-	tag:tandem
Psmd4:m4302:a:0	u:48603	chr3:94837555:94837819:-	u:48602	chr3:94836845:94837399:-	tag:alter
Tmem201:m4302:a:0	u:54009	chr4:149098973:149101316:-	u:54007	chr4:149089484:149090568:-	tag:alter
Tmem201:m4302:a:1	u:54010	chr4:149102899:149103638:-	u:54007	chr4:149089484:149090568:-	tag:alter
Tmem201:m4302:a:2	u:54010	chr4:149102899:149103638:-	u:54009	chr4:149098973:149101316:-	tag:alter
Tmem204:m4302:t:0	u:32051	chr17:25194987:25195173:-	u:32050	chr17:25194647:25194986:-	tag:tandem
Tmem206:m4302:t:0	u:4892	chr1:193174286:193174792:+	u:4895	chr1:193176368:193176803:+	tag:tandem
Tmem209:m4302:t:0	u:62369	chr6:30432415:30432985:-	u:62367	chr6:30431230:30432362:-	tag:tandem
Rfc1:m4302:t:0	u:57554	chr5:65653840:65654301:-	u:57553	chr5:65653091:65653839:-	tag:tandem
Smap1:m4302:t:0	u:180	chr1:23852683:23852827:-	u:179	chr1:23852466:23852682:-	tag:tandem
Smap1:m4302:t:1	u:181	chr1:23852828:23853084:-	u:179	chr1:23852466:23852682:-	tag:tandem
Smap1:m4302:t:2	u:182	chr1:23853085:23853402:-	u:179	chr1:23852466:23852682:-	tag:tandem
Smap1:m4302:a:0	u:184	chr1:23855634:23856307:-	u:179	chr1:23852466:23852682:-	tag:alter
Smap1:m4302:t:3	u:181	chr1:23852828:23853084:-	u:180	chr1:23852683:23852827:-	tag:tandem
Smap1:m4302:t:4	u:182	chr1:23853085:23853402:-	u:180	chr1:23852683:23852827:-	tag:tandem
Smap1:m4302:a:1	u:184	chr1:23855634:23856307:-	u:180	chr1:23852683:23852827:-	tag:alter
Smap1:m4302:t:5	u:182	chr1:23853085:23853402:-	u:181	chr1:23852828:23853084:-	tag:tandem
Smap1:m4302:a:2	u:184	chr1:23855634:23856307:-	u:181	chr1:23852828:23853084:-	tag:alter
Smap1:m4302:a:3	u:184	chr1:23855634:23856307:-	u:182	chr1:23853085:23853402:-	tag:alter
2310045N01Rik:m4302:a:0	u:75783	chr8:72668922:72669444:+	u:75789	chr8:72671159:72672530:+	tag:alter
Uhrf1bp1l:m4302:t:0	u:8502	chr10:89280927:89281304:+	u:8504	chr10:89281870:89282616:+	tag:tandem
Pdgfd:m4302:t:0	u:79705	chr9:6376908:6377518:+	u:79706	chr9:6377519:6378844:+	tag:tandem
Abhd2:m4302:t:0	u:71652	chr7:86505042:86505288:+	u:71654	chr7:86505569:86506336:+	tag:tandem
Abhd6:m4302:t:0	u:24053	chr14:8888158:8888423:+	u:24055	chr14:8888543:8889070:+	tag:tandem
Abhd6:m4302:t:1	u:24053	chr14:8888158:8888423:+	u:24056	chr14:8889071:8889178:+	tag:tandem
Abhd6:m4302:t:2	u:24055	chr14:8888543:8889070:+	u:24056	chr14:8889071:8889178:+	tag:tandem
Adcyap1r1:m4302:t:0	u:65187	chr6:55447165:55448082:+	u:65190	chr6:55448223:55448876:+	tag:tandem
Adcyap1r1:m4302:t:1	u:65187	chr6:55447165:55448082:+	u:65192	chr6:55450315:55451338:+	tag:tandem
Adcyap1r1:m4302:t:2	u:65190	chr6:55448223:55448876:+	u:65192	chr6:55450315:55451338:+	tag:tandem
2310003H01Rik:m4302:a:0	u:11957	chr11:120237484:120237993:-	u:11953	chr11:120230876:120231366:-	tag:alter
Fech:m4302:t:0	u:36314	chr18:64616919:64617307:-	u:36313	chr18:64616258:64616918:-	tag:tandem
Fech:m4302:t:1	u:36315	chr18:64617308:64617381:-	u:36313	chr18:64616258:64616918:-	tag:tandem
Fech:m4302:t:2	u:36316	chr18:64617382:64618254:-	u:36313	chr18:64616258:64616918:-	tag:tandem
Fech:m4302:t:3	u:36315	chr18:64617308:64617381:-	u:36314	chr18:64616919:64617307:-	tag:tandem
Fech:m4302:t:4	u:36316	chr18:64617382:64618254:-	u:36314	chr18:64616919:64617307:-	tag:tandem
Fech:m4302:t:5	u:36316	chr18:64617382:64618254:-	u:36315	chr18:64617308:64617381:-	tag:tandem
Bdkrb2:m4302:t:0	u:18657	chr12:106830890:106831280:+	u:18658	chr12:106831281:106833447:+	tag:tandem
Prpsap1:m4302:t:0	u:11768	chr11:116332266:116332869:-	u:11767	chr11:116332130:116332265:-	tag:tandem
BC017158:m4302:t:0	u:69743	chr7:135415021:135415839:-	u:69742	chr7:135414893:135415020:-	tag:tandem
Clvs1:m4302:a:0	u:54253	chr4:9209163:9209418:+	u:54255	chr4:9376624:9378837:+	tag:alter
Clvs2:m4302:a:0	u:5282	chr10:33314117:33315429:-	u:5281	chr10:33232688:33233064:-	tag:alter
Nckap1l:m4302:t:0	u:28818	chr15:103328187:103328370:+	u:28819	chr15:103328371:103329239:+	tag:tandem
Dach2:m4302:a:0	u:84323	chrX:110944701:110947669:+	u:84325	chrX:110949057:110949994:+	tag:alter
Prkab2:m4302:t:0	u:50806	chr3:97473650:97475999:+	u:50807	chr3:97476000:97476989:+	tag:tandem
Prkab2:m4302:t:1	u:50806	chr3:97473650:97475999:+	u:50808	chr3:97476990:97477734:+	tag:tandem
Prkab2:m4302:t:2	u:50807	chr3:97476000:97476989:+	u:50808	chr3:97476990:97477734:+	tag:tandem
Sdc1:m4302:t:0	u:17364	chr12:8798613:8799877:+	u:17365	chr12:8799878:8800520:+	tag:tandem
Sdc2:m4302:t:0	u:27605	chr15:32962367:32963095:+	u:27607	chr15:32963383:32964186:+	tag:tandem
Sdc2:m4302:t:1	u:27605	chr15:32962367:32963095:+	u:27608	chr15:32964187:32964484:+	tag:tandem
Sdc2:m4302:t:2	u:27607	chr15:32963383:32964186:+	u:27608	chr15:32964187:32964484:+	tag:tandem
Sdc4:m4302:t:0	u:43607	chr2:164250193:164250720:-	u:43606	chr2:164249747:164250192:-	tag:tandem
Sdc4:m4302:t:1	u:43610	chr2:164250889:164251193:-	u:43606	chr2:164249747:164250192:-	tag:tandem
Sdc4:m4302:t:2	u:43610	chr2:164250889:164251193:-	u:43607	chr2:164250193:164250720:-	tag:tandem
Mapk10:m4302:a:0	u:58030	chr5:103416893:103418609:-	u:58029	chr5:103341386:103342334:-	tag:alter
2510006D16Rik:m4302:a:0	u:55932	chr4:129279438:129279504:+	u:55934	chr4:129284699:129285122:+	tag:alter
2510006D16Rik:m4302:a:1	u:55932	chr4:129279438:129279504:+	u:55935	chr4:129285123:129285771:+	tag:alter
2510006D16Rik:m4302:t:0	u:55934	chr4:129284699:129285122:+	u:55935	chr4:129285123:129285771:+	tag:tandem
Naa38:m4302:t:0	u:64560	chr6:18803691:18803826:+	u:64563	chr6:18804056:18805764:+	tag:tandem
Naa30:m4302:t:0	u:24775	chr14:49807362:49807562:+	u:24776	chr14:49807563:49807926:+	tag:tandem
Naa30:m4302:t:1	u:24775	chr14:49807362:49807562:+	u:24778	chr14:49809048:49810541:+	tag:tandem
Naa30:m4302:t:2	u:24776	chr14:49807563:49807926:+	u:24778	chr14:49809048:49810541:+	tag:tandem
Nkd2:m4302:t:0	u:20244	chr13:73956776:73957539:-	u:20243	chr13:73955983:73956775:-	tag:tandem
Nkd2:m4302:t:1	u:20246	chr13:73958025:73958407:-	u:20243	chr13:73955983:73956775:-	tag:tandem
Nkd2:m4302:t:2	u:20246	chr13:73958025:73958407:-	u:20244	chr13:73956776:73957539:-	tag:tandem
Pde1c:m4302:a:0	u:62805	chr6:56029982:56032031:-	u:62803	chr6:56019792:56021035:-	tag:alter
Pde1c:m4302:a:1	u:62808	chr6:56050434:56053999:-	u:62803	chr6:56019792:56021035:-	tag:alter
Pde1c:m4302:a:2	u:62809	chr6:56054000:56056843:-	u:62803	chr6:56019792:56021035:-	tag:alter
Pde1c:m4302:a:3	u:62821	chr6:56128682:56129153:-	u:62803	chr6:56019792:56021035:-	tag:alter
Pde1c:m4302:a:4	u:62808	chr6:56050434:56053999:-	u:62805	chr6:56029982:56032031:-	tag:alter
Pde1c:m4302:a:5	u:62809	chr6:56054000:56056843:-	u:62805	chr6:56029982:56032031:-	tag:alter
Pde1c:m4302:a:6	u:62821	chr6:56128682:56129153:-	u:62805	chr6:56029982:56032031:-	tag:alter
Pde1c:m4302:t:0	u:62809	chr6:56054000:56056843:-	u:62808	chr6:56050434:56053999:-	tag:tandem
Pde1c:m4302:a:7	u:62821	chr6:56128682:56129153:-	u:62808	chr6:56050434:56053999:-	tag:alter
Pde1c:m4302:a:8	u:62821	chr6:56128682:56129153:-	u:62809	chr6:56054000:56056843:-	tag:alter
Kif3b:m4302:t:0	u:46924	chr2:153155891:153156641:+	u:46925	chr2:153156642:153159125:+	tag:tandem
Pde12:m4302:t:0	u:22601	chr14:27484505:27485420:-	u:22600	chr14:27483603:27484504:-	tag:tandem
Kif3c:m4302:t:0	u:17285	chr12:3402885:3404065:+	u:17286	chr12:3404066:3406493:+	tag:tandem
Kif24:m4302:a:0	u:51992	chr4:41401423:41402395:-	u:51991	chr4:41360581:41360854:-	tag:alter
AK154225:m4302:t:0	u:30200	chr16:4977590:4978148:+	u:30201	chr16:4978149:4979057:+	tag:tandem
Kif2c:m4302:a:0	u:53096	chr4:116847013:116847482:-	u:53094	chr4:116832241:116832741:-	tag:alter
Fam20b:m4302:t:0	u:1713	chr1:158611154:158611541:-	u:1712	chr1:158608676:158611153:-	tag:tandem
Fam20b:m4302:a:0	u:1714	chr1:158631773:158635794:-	u:1712	chr1:158608676:158611153:-	tag:alter
Fam20b:m4302:a:1	u:1714	chr1:158631773:158635794:-	u:1713	chr1:158611154:158611541:-	tag:alter
Spag1:m4302:t:0	u:27644	chr15:36164653:36164931:+	u:27645	chr15:36164932:36165375:+	tag:tandem
5930434B04Rik:m4302:t:0	u:44514	chr2:26871003:26871760:+	u:44515	chr2:26871761:26872266:+	tag:tandem
5930434B04Rik:m4302:t:1	u:44514	chr2:26871003:26871760:+	u:44517	chr2:26872371:26872539:+	tag:tandem
5930434B04Rik:m4302:t:2	u:44514	chr2:26871003:26871760:+	u:44518	chr2:26872540:26872959:+	tag:tandem
5930434B04Rik:m4302:a:0	u:44514	chr2:26871003:26871760:+	u:44521	chr2:26875540:26876207:+	tag:alter
5930434B04Rik:m4302:a:1	u:44514	chr2:26871003:26871760:+	u:44522	chr2:26876208:26876609:+	tag:alter
5930434B04Rik:m4302:t:3	u:44515	chr2:26871761:26872266:+	u:44517	chr2:26872371:26872539:+	tag:tandem
5930434B04Rik:m4302:t:4	u:44515	chr2:26871761:26872266:+	u:44518	chr2:26872540:26872959:+	tag:tandem
5930434B04Rik:m4302:a:2	u:44515	chr2:26871761:26872266:+	u:44521	chr2:26875540:26876207:+	tag:alter
5930434B04Rik:m4302:a:3	u:44515	chr2:26871761:26872266:+	u:44522	chr2:26876208:26876609:+	tag:alter
5930434B04Rik:m4302:t:5	u:44517	chr2:26872371:26872539:+	u:44518	chr2:26872540:26872959:+	tag:tandem
5930434B04Rik:m4302:a:4	u:44517	chr2:26872371:26872539:+	u:44521	chr2:26875540:26876207:+	tag:alter
5930434B04Rik:m4302:a:5	u:44517	chr2:26872371:26872539:+	u:44522	chr2:26876208:26876609:+	tag:alter
5930434B04Rik:m4302:a:6	u:44518	chr2:26872540:26872959:+	u:44521	chr2:26875540:26876207:+	tag:alter
5930434B04Rik:m4302:a:7	u:44518	chr2:26872540:26872959:+	u:44522	chr2:26876208:26876609:+	tag:alter
5930434B04Rik:m4302:t:6	u:44521	chr2:26875540:26876207:+	u:44522	chr2:26876208:26876609:+	tag:tandem
Gpc6:m4302:a:0	u:25660	chr14:118023810:118026419:+	u:25661	chr14:118374308:118374630:+	tag:alter
Gpc6:m4302:a:1	u:25660	chr14:118023810:118026419:+	u:25662	chr14:118374631:118378751:+	tag:alter
Gpc6:m4302:t:0	u:25661	chr14:118374308:118374630:+	u:25662	chr14:118374631:118378751:+	tag:tandem
Prkar2a:m4302:t:0	u:81483	chr9:108649571:108651842:+	u:81484	chr9:108651843:108652676:+	tag:tandem
Tarbp1:m4302:t:0	u:74892	chr8:128949215:128950551:-	u:74891	chr8:128947900:128949214:-	tag:tandem
Prkar2b:m4302:t:0	u:15360	chr12:32643682:32644647:-	u:15359	chr12:32643328:32643681:-	tag:tandem
Man1a2:m4302:t:0	u:48759	chr3:100369360:100370110:-	u:48757	chr3:100366127:100368026:-	tag:tandem
Man1a2:m4302:t:1	u:48760	chr3:100370111:100371532:-	u:48757	chr3:100366127:100368026:-	tag:tandem
Man1a2:m4302:t:2	u:48760	chr3:100370111:100371532:-	u:48759	chr3:100369360:100370110:-	tag:tandem
H6pd:m4302:t:0	u:54017	chr4:149353860:149355666:-	u:54016	chr4:149353550:149353859:-	tag:tandem
Acbd4:m4302:t:0	u:14431	chr11:102972975:102973365:+	u:14432	chr11:102973366:102973512:+	tag:tandem
Enox1:m4302:t:0	u:25517	chr14:78120619:78121213:+	u:25518	chr14:78121214:78121567:+	tag:tandem
Nr2f2:m4302:t:0	u:68492	chr7:77498395:77499321:-	u:68490	chr7:77496836:77498326:-	tag:tandem
AK039117:m4302:t:0	u:51863	chr4:22409927:22412965:-	u:51862	chr4:22409463:22409926:-	tag:tandem
Pcqap:m4302:a:0	u:29104	chr16:17682368:17685486:-	u:29103	chr16:17678060:17680513:-	tag:alter
Tsn:m4302:t:0	u:1108	chr1:120196487:120196916:-	u:1107	chr1:120195095:120196486:-	tag:tandem
wdr4;Wdr4:m4302:t:0	u:32370	chr17:31633059:31633873:-	u:32369	chr17:31631267:31633058:-	tag:tandem
Cinp:m4302:a:0	u:16439	chr12:112115804:112116129:-	u:16436	chr12:112111372:112111817:-	tag:alter
Get4:m4302:t:0	u:61862	chr5:139745023:139745282:+	u:61863	chr5:139745283:139746003:+	tag:tandem
Cd22:m4302:a:0	u:67636	chr7:31652481:31652599:-	u:67634	chr7:31650842:31651681:-	tag:alter
Ugt2a3:m4302:t:0	u:57818	chr5:87754342:87754476:-	u:57817	chr5:87753997:87754341:-	tag:tandem
Synpo2l:m4302:t:0	u:22509	chr14:21478640:21479522:-	u:22508	chr14:21478170:21478639:-	tag:tandem
Eif2s2:m4302:t:0	u:43336	chr2:154698173:154698460:-	u:43334	chr2:154697146:154698085:-	tag:tandem
Eif2s2:m4302:a:0	u:43337	chr2:154710079:154713418:-	u:43334	chr2:154697146:154698085:-	tag:alter
Eif2s2:m4302:a:1	u:43337	chr2:154710079:154713418:-	u:43336	chr2:154698173:154698460:-	tag:alter
2010321M09Rik:m4302:t:0	u:80639	chr9:64833908:64834456:+	u:80640	chr9:64834457:64834786:+	tag:tandem
Gnao1:m4302:a:0	u:76444	chr8:96480152:96484523:+	u:76447	chr8:96491567:96492855:+	tag:alter
AB341654:m4302:t:0	u:14067	chr11:95630629:95633171:+	u:14068	chr11:95633172:95633666:+	tag:tandem
Tank:m4302:a:0	u:45018	chr2:61488363:61489855:+	u:45019	chr2:61491435:61492167:+	tag:alter
Tmem33:m4302:t:0	u:60327	chr5:67677464:67677775:+	u:60328	chr5:67677776:67678602:+	tag:tandem
Tmem33:m4302:t:1	u:60327	chr5:67677464:67677775:+	u:60329	chr5:67678603:67678997:+	tag:tandem
Tmem33:m4302:t:2	u:60327	chr5:67677464:67677775:+	u:60331	chr5:67679280:67680033:+	tag:tandem
Tmem33:m4302:t:3	u:60327	chr5:67677464:67677775:+	u:60332	chr5:67680034:67682631:+	tag:tandem
Tmem33:m4302:t:4	u:60328	chr5:67677776:67678602:+	u:60329	chr5:67678603:67678997:+	tag:tandem
Tmem33:m4302:t:5	u:60328	chr5:67677776:67678602:+	u:60331	chr5:67679280:67680033:+	tag:tandem
Tmem33:m4302:t:6	u:60328	chr5:67677776:67678602:+	u:60332	chr5:67680034:67682631:+	tag:tandem
Tmem33:m4302:t:7	u:60329	chr5:67678603:67678997:+	u:60331	chr5:67679280:67680033:+	tag:tandem
Tmem33:m4302:t:8	u:60329	chr5:67678603:67678997:+	u:60332	chr5:67680034:67682631:+	tag:tandem
Tmem33:m4302:t:9	u:60331	chr5:67679280:67680033:+	u:60332	chr5:67680034:67682631:+	tag:tandem
Sf1:m4302:t:0	u:39670	chr19:6376038:6377202:+	u:39671	chr19:6377203:6378037:+	tag:tandem
Igbp1:m4302:a:0	u:84191	chrX:97690676:97694737:+	u:84192	chrX:97711044:97711339:+	tag:alter
Rangap1:m4302:t:0	u:26715	chr15:81535307:81535618:-	u:26714	chr15:81534678:81535306:-	tag:tandem
Cytip:m4302:t:0	u:41713	chr2:57985178:57985273:-	u:41712	chr2:57981549:57985177:-	tag:tandem
Cytip:m4302:t:1	u:41714	chr2:57985274:57986137:-	u:41712	chr2:57981549:57985177:-	tag:tandem
Cytip:m4302:t:2	u:41714	chr2:57985274:57986137:-	u:41713	chr2:57985178:57985273:-	tag:tandem
Ddhd1:m4302:t:0	u:22870	chr14:46214396:46215157:-	u:22868	chr14:46212846:46214209:-	tag:tandem
Ggps1:m4302:a:0	u:19198	chr13:14144714:14145249:-	u:19195	chr13:14143196:14143913:-	tag:alter
Ggps1:m4302:a:1	u:19200	chr13:14145940:14146722:-	u:19195	chr13:14143196:14143913:-	tag:alter
Ggps1:m4302:t:0	u:19200	chr13:14145940:14146722:-	u:19198	chr13:14144714:14145249:-	tag:tandem
Enah:m4302:t:0	u:2198	chr1:183833753:183834256:-	u:2196	chr1:183833090:183833681:-	tag:tandem
Enah:m4302:t:1	u:2203	chr1:183835639:183835990:-	u:2196	chr1:183833090:183833681:-	tag:tandem
Enah:m4302:t:2	u:2203	chr1:183835639:183835990:-	u:2198	chr1:183833753:183834256:-	tag:tandem
Clock:m4302:t:0	u:57726	chr5:76639958:76640870:-	u:57725	chr5:76638894:76639957:-	tag:tandem
Clock:m4302:t:1	u:57728	chr5:76641202:76645723:-	u:57725	chr5:76638894:76639957:-	tag:tandem
Clock:m4302:a:0	u:57730	chr5:76664142:76664730:-	u:57725	chr5:76638894:76639957:-	tag:alter
Clock:m4302:t:2	u:57728	chr5:76641202:76645723:-	u:57726	chr5:76639958:76640870:-	tag:tandem
Clock:m4302:a:1	u:57730	chr5:76664142:76664730:-	u:57726	chr5:76639958:76640870:-	tag:alter
Clock:m4302:a:2	u:57730	chr5:76664142:76664730:-	u:57728	chr5:76641202:76645723:-	tag:alter
Krt222:m4302:t:0	u:11123	chr11:99094412:99095196:-	u:11122	chr11:99094075:99094411:-	tag:tandem
Krt222:m4302:t:1	u:11124	chr11:99095197:99095585:-	u:11122	chr11:99094075:99094411:-	tag:tandem
Krt222:m4302:t:2	u:11125	chr11:99095586:99095981:-	u:11122	chr11:99094075:99094411:-	tag:tandem
Krt222:m4302:t:3	u:11124	chr11:99095197:99095585:-	u:11123	chr11:99094412:99095196:-	tag:tandem
Krt222:m4302:t:4	u:11125	chr11:99095586:99095981:-	u:11123	chr11:99094412:99095196:-	tag:tandem
Krt222:m4302:t:5	u:11125	chr11:99095586:99095981:-	u:11124	chr11:99095197:99095585:-	tag:tandem
Cd94;Klrd1:m4302:t:0	u:66554	chr6:129548366:129548474:+	u:66555	chr6:129548475:129548669:+	tag:tandem
Stk38l:m4302:t:0	u:66749	chr6:146724243:146725077:+	u:66750	chr6:146725078:146727087:+	tag:tandem
Scd2:m4302:t:0	u:40447	chr19:44377867:44378445:+	u:40449	chr19:44379342:44381351:+	tag:tandem
Hspa4l:m4302:t:0	u:49923	chr3:40593510:40594369:+	u:49925	chr3:40594898:40595556:+	tag:tandem
Ptp4a2:m4302:t:0	u:55936	chr4:129525066:129525243:+	u:55938	chr4:129525690:129526705:+	tag:tandem
Ptp4a2:m4302:t:1	u:55936	chr4:129525066:129525243:+	u:55939	chr4:129526706:129527032:+	tag:tandem
Ptp4a2:m4302:t:2	u:55938	chr4:129525690:129526705:+	u:55939	chr4:129526706:129527032:+	tag:tandem
2210012G02Rik:m4302:t:0	u:52917	chr4:106811419:106812215:-	u:52915	chr4:106806760:106807709:-	tag:tandem
Polr1d:m4302:a:0	u:62040	chr5:147890486:147890660:+	u:62041	chr5:147922503:147922936:+	tag:alter
dnam-1;Cd226:m4302:t:0	u:38021	chr18:89438359:89439718:+	u:38022	chr18:89439719:89441621:+	tag:tandem
Dck:m4302:t:0	u:60578	chr5:89210271:89211432:+	u:60579	chr5:89211433:89211984:+	tag:tandem
Dck:m4302:t:1	u:60578	chr5:89210271:89211432:+	u:60580	chr5:89211985:89212334:+	tag:tandem
Dck:m4302:t:2	u:60579	chr5:89211433:89211984:+	u:60580	chr5:89211985:89212334:+	tag:tandem
Onecut1:m4302:a:0	u:80944	chr9:74698567:74700678:+	u:80945	chr9:74737112:74737453:+	tag:alter
Onecut1:m4302:a:1	u:80944	chr9:74698567:74700678:+	u:80946	chr9:74737454:74738166:+	tag:alter
Onecut1:m4302:t:0	u:80945	chr9:74737112:74737453:+	u:80946	chr9:74737454:74738166:+	tag:tandem
Paics:m4302:t:0	u:60464	chr5:77395839:77396355:+	u:60466	chr5:77396444:77396530:+	tag:tandem
Celf5:m4302:t:0	u:6163	chr10:80922385:80923972:-	u:6162	chr10:80921973:80922384:-	tag:tandem
Celf2:m4302:t:0	u:40901	chr2:6462915:6463241:-	u:40900	chr2:6460895:6462914:-	tag:tandem
Celf2:m4302:t:1	u:40902	chr2:6463242:6467378:-	u:40900	chr2:6460895:6462914:-	tag:tandem
Celf2:m4302:t:2	u:40902	chr2:6463242:6467378:-	u:40901	chr2:6462915:6463241:-	tag:tandem
Ralgapa1:m4302:a:0	u:15561	chr12:56711781:56713059:-	u:15560	chr12:56703886:56705255:-	tag:alter
Fam131b:m4302:t:0	u:62581	chr6:42267839:42268157:-	u:62580	chr6:42265715:42267838:-	tag:tandem
Dtwd2:m4302:t:0	u:36125	chr18:49857126:49858154:-	u:36124	chr18:49855796:49857125:-	tag:tandem
Aen:m4302:t:0	u:71643	chr7:86052029:86052466:+	u:71644	chr7:86052467:86053263:+	tag:tandem
Aen:m4302:t:1	u:71643	chr7:86052029:86052466:+	u:71645	chr7:86053264:86053718:+	tag:tandem
Aen:m4302:t:2	u:71643	chr7:86052029:86052466:+	u:71646	chr7:86053719:86056094:+	tag:tandem
Aen:m4302:t:3	u:71644	chr7:86052467:86053263:+	u:71645	chr7:86053264:86053718:+	tag:tandem
Aen:m4302:t:4	u:71644	chr7:86052467:86053263:+	u:71646	chr7:86053719:86056094:+	tag:tandem
Aen:m4302:t:5	u:71645	chr7:86053264:86053718:+	u:71646	chr7:86053719:86056094:+	tag:tandem
Aqp4:m4302:t:0	u:35778	chr18:15548203:15550776:-	u:35777	chr18:15548002:15548202:-	tag:tandem
Aqp4:m4302:t:1	u:35779	chr18:15550777:15551669:-	u:35777	chr18:15548002:15548202:-	tag:tandem
Aqp4:m4302:t:2	u:35779	chr18:15550777:15551669:-	u:35778	chr18:15548203:15550776:-	tag:tandem
Cd47;AK018679:m4302:t:0	u:31103	chr16:49911196:49911795:+	u:31106	chr16:49912554:49915121:+	tag:tandem
Ahctf1:m4302:t:0	u:2155	chr1:181675468:181676220:-	u:2154	chr1:181675316:181675467:-	tag:tandem
Ahctf1:m4302:t:1	u:2156	chr1:181676221:181677306:-	u:2154	chr1:181675316:181675467:-	tag:tandem
Ahctf1:m4302:t:2	u:2156	chr1:181676221:181677306:-	u:2155	chr1:181675468:181676220:-	tag:tandem
8430419L09Rik:m4302:t:0	u:66584	chr6:135184002:135184259:+	u:66585	chr6:135184260:135186258:+	tag:tandem
Stk24:m4302:t:0	u:23828	chr14:121685563:121686018:-	u:23827	chr14:121683409:121685562:-	tag:tandem
Stk24:m4302:t:1	u:23829	chr14:121686019:121686549:-	u:23827	chr14:121683409:121685562:-	tag:tandem
Stk24:m4302:t:2	u:23829	chr14:121686019:121686549:-	u:23828	chr14:121685563:121686018:-	tag:tandem
Dda1:m4302:t:0	u:75899	chr8:73998608:73998681:+	u:75900	chr8:73998682:73998991:+	tag:tandem
Dda1:m4302:t:1	u:75899	chr8:73998608:73998681:+	u:75901	chr8:73998992:73999998:+	tag:tandem
Dda1:m4302:t:2	u:75900	chr8:73998682:73998991:+	u:75901	chr8:73998992:73999998:+	tag:tandem
Epdr1:m4302:t:0	u:19264	chr13:19684908:19685213:-	u:19262	chr13:19683699:19684516:-	tag:tandem
Ppp2r2d:m4302:t:0	u:72715	chr7:146074171:146074411:+	u:72716	chr7:146074412:146074738:+	tag:tandem
2210010C17Rik:m4302:t:0	u:67237	chr7:20523401:20523593:-	u:67236	chr7:20522654:20523400:-	tag:tandem
Usp36:m4302:a:0	u:11890	chr11:118145109:118146101:-	u:11887	chr11:118120967:118122127:-	tag:alter
Heatr6:m4302:t:0	u:13789	chr11:83595224:83595527:+	u:13790	chr11:83595528:83596117:+	tag:tandem
Heatr6:m4302:t:1	u:13789	chr11:83595224:83595527:+	u:13792	chr11:83596198:83597256:+	tag:tandem
Heatr6:m4302:t:2	u:13790	chr11:83595528:83596117:+	u:13792	chr11:83596198:83597256:+	tag:tandem
Heatr2:m4302:t:0	u:61856	chr5:139661600:139662176:+	u:61857	chr5:139662177:139662461:+	tag:tandem
Ighmbp2:m4302:t:0	u:38046	chr19:3260925:3261431:-	u:38045	chr19:3259076:3260924:-	tag:tandem
Nck2:m4302:a:0	u:2790	chr1:43517801:43519066:+	u:2791	chr1:43626187:43627362:+	tag:alter
Ppp1r15b:m4302:t:0	u:3969	chr1:135033239:135033572:+	u:3971	chr1:135035026:135036376:+	tag:tandem
Prps2:m4302:t:0	u:83398	chrX:163785235:163786217:-	u:83396	chrX:163784255:163785025:-	tag:tandem
Prps2:m4302:t:1	u:83401	chrX:163786453:163786837:-	u:83396	chrX:163784255:163785025:-	tag:tandem
Prps2:m4302:t:2	u:83401	chrX:163786453:163786837:-	u:83398	chrX:163785235:163786217:-	tag:tandem
Atg7:m4302:t:0	u:65971	chr6:114809242:114809953:+	u:65972	chr6:114809954:114810629:+	tag:tandem
Armcx3:m4302:t:0	u:84378	chrX:131294271:131294629:+	u:84379	chrX:131294630:131295994:+	tag:tandem
Klf5:m4302:a:0	u:25589	chr14:99702704:99704549:+	u:25591	chr14:99712628:99714253:+	tag:alter
Klf4:m4302:t:0	u:52309	chr4:55540795:55540996:-	u:52308	chr4:55540009:55540794:-	tag:tandem
Klf3:m4302:a:0	u:60263	chr5:65214347:65216044:+	u:60265	chr5:65218348:65218508:+	tag:alter
Klf3:m4302:a:1	u:60263	chr5:65214347:65216044:+	u:60268	chr5:65220790:65221367:+	tag:alter
Klf3:m4302:a:2	u:60263	chr5:65214347:65216044:+	u:60271	chr5:65222396:65224144:+	tag:alter
Klf3:m4302:t:0	u:60268	chr5:65220790:65221367:+	u:60271	chr5:65222396:65224144:+	tag:tandem
Klf9:m4302:t:0	u:40047	chr19:23239402:23239672:+	u:40048	chr19:23239673:23240273:+	tag:tandem
Klf9:m4302:t:1	u:40047	chr19:23239402:23239672:+	u:40050	chr19:23240429:23240771:+	tag:tandem
Klf9:m4302:t:2	u:40047	chr19:23239402:23239672:+	u:40051	chr19:23240772:23241425:+	tag:tandem
Klf9:m4302:t:3	u:40047	chr19:23239402:23239672:+	u:40052	chr19:23241426:23242615:+	tag:tandem
Klf9:m4302:t:4	u:40048	chr19:23239673:23240273:+	u:40050	chr19:23240429:23240771:+	tag:tandem
Klf9:m4302:t:5	u:40048	chr19:23239673:23240273:+	u:40051	chr19:23240772:23241425:+	tag:tandem
Klf9:m4302:t:6	u:40048	chr19:23239673:23240273:+	u:40052	chr19:23241426:23242615:+	tag:tandem
Klf9:m4302:t:7	u:40050	chr19:23240429:23240771:+	u:40051	chr19:23240772:23241425:+	tag:tandem
Klf9:m4302:t:8	u:40050	chr19:23240429:23240771:+	u:40052	chr19:23241426:23242615:+	tag:tandem
Klf9:m4302:t:9	u:40051	chr19:23240772:23241425:+	u:40052	chr19:23241426:23242615:+	tag:tandem
Rest:m4302:t:0	u:60475	chr5:77712009:77712721:+	u:60476	chr5:77712722:77715455:+	tag:tandem
Cltb:m4302:t:0	u:19779	chr13:54694914:54695231:-	u:19776	chr13:54693748:54694299:-	tag:tandem
Cltb:m4302:a:0	u:19780	chr13:54697401:54700078:-	u:19776	chr13:54693748:54694299:-	tag:alter
Cltb:m4302:a:1	u:19780	chr13:54697401:54700078:-	u:19779	chr13:54694914:54695231:-	tag:alter
D930016D06Rik:m4302:t:0	u:60766	chr5:104979904:104982178:+	u:60767	chr5:104982179:104983229:+	tag:tandem
Parp6:m4302:a:0	u:80530	chr9:59472470:59472824:+	u:80532	chr9:59473196:59475389:+	tag:alter
Parp1:m4302:t:0	u:4726	chr1:182530662:182531130:+	u:4727	chr1:182531131:182531384:+	tag:tandem
Stam2:m4302:t:0	u:41685	chr2:52548875:52549427:-	u:41683	chr2:52548129:52548535:-	tag:tandem
Stam2:m4302:a:0	u:41688	chr2:52558536:52559034:-	u:41683	chr2:52548129:52548535:-	tag:alter
Stam2:m4302:a:1	u:41688	chr2:52558536:52559034:-	u:41685	chr2:52548875:52549427:-	tag:alter
Tsc22d2:m4302:t:0	u:50112	chr3:58263929:58265641:+	u:50113	chr3:58265642:58270713:+	tag:tandem
Tsc22d4:m4302:a:0	u:61800	chr5:138200504:138200974:+	u:61801	chr5:138209259:138209620:+	tag:alter
Gm10094:m4302:t:0	u:25213	chr14:58421771:58422312:+	u:25215	chr14:58423228:58423816:+	tag:tandem
Xpr1:m4302:t:0	u:1664	chr1:157125906:157126111:-	u:1663	chr1:157122787:157125905:-	tag:tandem
Xpr1:m4302:t:1	u:1665	chr1:157126112:157126945:-	u:1663	chr1:157122787:157125905:-	tag:tandem
Xpr1:m4302:t:2	u:1666	chr1:157126946:157128139:-	u:1663	chr1:157122787:157125905:-	tag:tandem
Xpr1:m4302:a:0	u:1667	chr1:157129313:157130329:-	u:1663	chr1:157122787:157125905:-	tag:alter
Xpr1:m4302:t:3	u:1665	chr1:157126112:157126945:-	u:1664	chr1:157125906:157126111:-	tag:tandem
Xpr1:m4302:t:4	u:1666	chr1:157126946:157128139:-	u:1664	chr1:157125906:157126111:-	tag:tandem
Xpr1:m4302:a:1	u:1667	chr1:157129313:157130329:-	u:1664	chr1:157125906:157126111:-	tag:alter
Xpr1:m4302:t:5	u:1666	chr1:157126946:157128139:-	u:1665	chr1:157126112:157126945:-	tag:tandem
Xpr1:m4302:a:2	u:1667	chr1:157129313:157130329:-	u:1665	chr1:157126112:157126945:-	tag:alter
Xpr1:m4302:a:3	u:1667	chr1:157129313:157130329:-	u:1666	chr1:157126946:157128139:-	tag:alter
Mpp3:m4302:a:0	u:11298	chr11:101883071:101884445:-	u:11293	chr11:101860967:101861494:-	tag:alter
Mpp1:m4302:t:0	u:82832	chrX:72355774:72356005:-	u:82829	chrX:72355072:72355613:-	tag:tandem
Mpp5:m4302:t:0	u:18070	chr12:79938621:79940083:+	u:18071	chr12:79940084:79941561:+	tag:tandem
Frk:m4302:t:0	u:7274	chr10:34328377:34328647:+	u:7275	chr10:34328648:34329483:+	tag:tandem
Frk:m4302:t:1	u:7274	chr10:34328377:34328647:+	u:7277	chr10:34330135:34331063:+	tag:tandem
Frk:m4302:t:2	u:7275	chr10:34328648:34329483:+	u:7277	chr10:34330135:34331063:+	tag:tandem
Nr4a2:m4302:t:0	u:41703	chr2:56959637:56960823:-	u:41702	chr2:56959245:56959636:-	tag:tandem
Erg:m4302:t:0	u:30059	chr16:95581811:95582412:-	u:30058	chr16:95580776:95581810:-	tag:tandem
Mut:m4302:t:0	u:34921	chr17:41097936:41098170:+	u:34922	chr17:41098171:41098540:+	tag:tandem
Mut:m4302:t:1	u:34921	chr17:41097936:41098170:+	u:34925	chr17:41098938:41100930:+	tag:tandem
Mut:m4302:t:2	u:34922	chr17:41098171:41098540:+	u:34925	chr17:41098938:41100930:+	tag:tandem
Plekha4:m4302:a:0	u:71151	chr7:52804599:52804938:+	u:71155	chr7:52809134:52809598:+	tag:alter
Plekha1:m4302:a:0	u:72618	chr7:138051990:138053334:+	u:72620	chr7:138055000:138056820:+	tag:alter
Plekha2:m4302:t:0	u:73270	chr8:26151304:26152540:-	u:73269	chr8:26149617:26151303:-	tag:tandem
Plekha2:m4302:t:1	u:73271	chr8:26152541:26152804:-	u:73269	chr8:26149617:26151303:-	tag:tandem
Plekha2:m4302:t:2	u:73272	chr8:26152805:26153147:-	u:73269	chr8:26149617:26151303:-	tag:tandem
Plekha2:m4302:t:3	u:73271	chr8:26152541:26152804:-	u:73270	chr8:26151304:26152540:-	tag:tandem
Plekha2:m4302:t:4	u:73272	chr8:26152805:26153147:-	u:73270	chr8:26151304:26152540:-	tag:tandem
Plekha2:m4302:t:5	u:73272	chr8:26152805:26153147:-	u:73271	chr8:26152541:26152804:-	tag:tandem
Plekha3:m4302:t:0	u:45305	chr2:76533559:76533781:+	u:45306	chr2:76533782:76534633:+	tag:tandem
Usp6nl:m4302:t:0	u:44117	chr2:6364541:6364865:+	u:44118	chr2:6364866:6367439:+	tag:tandem
Pbx3;Pbx1:m4302:t:0	u:41468	chr2:34027429:34028493:-	u:41467	chr2:34026978:34027428:-	tag:tandem
Nell1:m4302:t:0	u:71254	chr7:58118319:58118658:+	u:71256	chr7:58118717:58120626:+	tag:tandem
Trps1:m4302:t:0	u:26036	chr15:50489970:50492220:-	u:26034	chr15:50486741:50489803:-	tag:tandem
AU041133:m4302:t:0	u:8288	chr10:81614756:81615809:+	u:8289	chr10:81615810:81616270:+	tag:tandem
Chrna4:m4302:t:0	u:44004	chr2:180757435:180759252:-	u:44003	chr2:180757016:180757434:-	tag:tandem
Aff1:m4302:t:0	u:60744	chr5:104279842:104280269:+	u:60746	chr5:104280321:104283866:+	tag:tandem
Aff1:m4302:t:1	u:60744	chr5:104279842:104280269:+	u:60747	chr5:104283867:104284340:+	tag:tandem
Aff1:m4302:t:2	u:60746	chr5:104280321:104283866:+	u:60747	chr5:104283867:104284340:+	tag:tandem
BC002221:m4302:t:0	u:45504	chr2:90857827:90859053:+	u:45505	chr2:90859054:90859460:+	tag:tandem
Dzip1:m4302:t:0	u:23770	chr14:119275475:119276176:-	u:23769	chr14:119274732:119275474:-	tag:tandem
Dzip1:m4302:a:0	u:23772	chr14:119278104:119278734:-	u:23769	chr14:119274732:119275474:-	tag:alter
Dzip1:m4302:a:1	u:23772	chr14:119278104:119278734:-	u:23770	chr14:119275475:119276176:-	tag:alter
Dennd5b:m4302:t:0	u:64404	chr6:148938925:148942227:-	u:64403	chr6:148936590:148938924:-	tag:tandem
Dennd5b:m4302:a:0	u:64415	chr6:149001596:149003609:-	u:64403	chr6:148936590:148938924:-	tag:alter
Dennd5b:m4302:a:1	u:64415	chr6:149001596:149003609:-	u:64404	chr6:148938925:148942227:-	tag:alter
Opcml:m4302:t:0	u:79953	chr9:28729473:28732632:+	u:79954	chr9:28732633:28732994:+	tag:tandem
Fnip1:m4302:t:0	u:12754	chr11:54329078:54330433:+	u:12755	chr11:54330434:54331742:+	tag:tandem
Slc21a7;Slco1a5:m4302:a:0	u:64262	chr6:142196101:142197360:-	u:64257	chr6:142182743:142183402:-	tag:alter
Galntl6:m4302:t:0	u:73602	chr8:60255020:60256146:-	u:73601	chr8:60252849:60255019:-	tag:tandem
Gorasp1:m4302:t:0	u:79559	chr9:119835670:119836891:-	u:79558	chr9:119834791:119835669:-	tag:tandem
Rgs20:m4302:t:0	u:22	chr1:4900137:4900554:-	u:21	chr1:4899656:4900136:-	tag:tandem
Kcnj16:m4302:t:0	u:14664	chr11:110887087:110888111:+	u:14665	chr11:110888112:110889281:+	tag:tandem
Kcnj15:m4302:t:0	u:31508	chr16:95518336:95520113:+	u:31510	chr16:95521230:95521820:+	tag:tandem
Kcnj14:m4302:t:0	u:68084	chr7:53072261:53072985:-	u:68083	chr7:53071837:53072260:-	tag:tandem
Sema5a:m4302:a:0	u:27591	chr15:32548563:32549003:+	u:27602	chr15:32619050:32620294:+	tag:alter
Sema5a:m4302:a:1	u:27591	chr15:32548563:32549003:+	u:27603	chr15:32620295:32626095:+	tag:alter
Sema5a:m4302:t:0	u:27602	chr15:32619050:32620294:+	u:27603	chr15:32620295:32626095:+	tag:tandem
Dlx4:m4302:a:0	u:10964	chr11:95004941:95005927:-	u:10963	chr11:95001761:95002537:-	tag:alter
Dlx3:m4302:t:0	u:14044	chr11:94985070:94985814:+	u:14045	chr11:94985815:94986604:+	tag:tandem
Gns:m4302:a:0	u:8893	chr10:120808364:120809305:+	u:8896	chr10:120833337:120834306:+	tag:alter
Gne:m4302:t:0	u:52143	chr4:44049699:44049989:-	u:52141	chr4:44047257:44048471:-	tag:tandem
Cyp2j6:m4302:t:0	u:52824	chr4:96184379:96184717:-	u:52822	chr4:96182829:96183924:-	tag:tandem
Cyp2j5:m4302:t:0	u:52829	chr4:96295201:96295463:-	u:52828	chr4:96294123:96295200:-	tag:tandem
Cyp2j5:m4302:t:1	u:52833	chr4:96295838:96296158:-	u:52828	chr4:96294123:96295200:-	tag:tandem
Cyp2j5:m4302:t:2	u:52833	chr4:96295838:96296158:-	u:52829	chr4:96295201:96295463:-	tag:tandem
Slc10a7;P7:m4302:t:0	u:76041	chr8:81256048:81257477:+	u:76042	chr8:81257478:81257903:+	tag:tandem
Smpd4:m4302:t:0	u:30451	chr16:17642896:17643591:+	u:30453	chr16:17643890:17644855:+	tag:tandem
Sdk1:m4302:t:0	u:61907	chr5:142688256:142689162:+	u:61908	chr5:142689163:142689744:+	tag:tandem
BC016423:m4302:a:0	u:19031	chr13:3592435:3593287:-	u:19028	chr13:3565281:3565672:-	tag:alter
3632451O06Rik;AK087604:m4302:t:0	u:22924	chr14:50301690:50301927:-	u:22923	chr14:50301422:50301689:-	tag:tandem
Mysm1:m4302:a:0	u:52807	chr4:94630682:94631815:-	u:52804	chr4:94608914:94610069:-	tag:alter
A930004D18Rik:m4302:a:0	u:41038	chr2:17958307:17958724:-	u:41037	chr2:17946814:17949616:-	tag:alter
Ap3s2:m4302:t:0	u:68691	chr7:87021189:87022384:-	u:68690	chr7:87020209:87021188:-	tag:tandem
Ap3s2:m4302:t:1	u:68693	chr7:87022608:87023142:-	u:68690	chr7:87020209:87021188:-	tag:tandem
Ap3s2:m4302:t:2	u:68696	chr7:87024096:87024644:-	u:68690	chr7:87020209:87021188:-	tag:tandem
Ap3s2:m4302:t:3	u:68698	chr7:87024783:87025369:-	u:68690	chr7:87020209:87021188:-	tag:tandem
Ap3s2:m4302:t:4	u:68693	chr7:87022608:87023142:-	u:68691	chr7:87021189:87022384:-	tag:tandem
Ap3s2:m4302:t:5	u:68696	chr7:87024096:87024644:-	u:68691	chr7:87021189:87022384:-	tag:tandem
Ap3s2:m4302:t:6	u:68698	chr7:87024783:87025369:-	u:68691	chr7:87021189:87022384:-	tag:tandem
Ap3s2:m4302:t:7	u:68696	chr7:87024096:87024644:-	u:68693	chr7:87022608:87023142:-	tag:tandem
Ap3s2:m4302:t:8	u:68698	chr7:87024783:87025369:-	u:68693	chr7:87022608:87023142:-	tag:tandem
Ap3s2:m4302:t:9	u:68698	chr7:87024783:87025369:-	u:68696	chr7:87024096:87024644:-	tag:tandem
Ms4a1:m4302:t:0	u:38499	chr19:11325093:11326154:-	u:38498	chr19:11324638:11325092:-	tag:tandem
Sypl:m4302:t:0	u:17601	chr12:33660697:33661496:+	u:17602	chr12:33661497:33661777:+	tag:tandem
Sypl:m4302:t:1	u:17601	chr12:33660697:33661496:+	u:17603	chr12:33661778:33664237:+	tag:tandem
Sypl:m4302:t:2	u:17602	chr12:33661497:33661777:+	u:17603	chr12:33661778:33664237:+	tag:tandem
Fxr1:m4302:t:0	u:49849	chr3:33967855:33968265:+	u:49850	chr3:33968266:33968469:+	tag:tandem
Fxr1:m4302:t:1	u:49849	chr3:33967855:33968265:+	u:49851	chr3:33968470:33968590:+	tag:tandem
Fxr1:m4302:t:2	u:49849	chr3:33967855:33968265:+	u:49854	chr3:33968909:33969354:+	tag:tandem
Fxr1:m4302:t:3	u:49850	chr3:33968266:33968469:+	u:49851	chr3:33968470:33968590:+	tag:tandem
Fxr1:m4302:t:4	u:49850	chr3:33968266:33968469:+	u:49854	chr3:33968909:33969354:+	tag:tandem
Fxr1:m4302:t:5	u:49851	chr3:33968470:33968590:+	u:49854	chr3:33968909:33969354:+	tag:tandem
Fxr2:m4302:t:0	u:13178	chr11:69466201:69466322:+	u:13179	chr11:69466323:69466798:+	tag:tandem
Edn3:m4302:t:0	u:47485	chr2:174607419:174608120:+	u:47487	chr2:174608328:174609542:+	tag:tandem
Dpp8:m4302:t:0	u:80646	chr9:64929791:64930396:+	u:80648	chr9:64930464:64932309:+	tag:tandem
Dpp9:m4302:t:0	u:33097	chr17:56326489:56326791:-	u:33096	chr17:56326196:56326488:-	tag:tandem
Dpp4:m4302:t:0	u:41760	chr2:62169689:62169793:-	u:41757	chr2:62168130:62168550:-	tag:tandem
Dpp4:m4302:t:1	u:41762	chr2:62169852:62170674:-	u:41757	chr2:62168130:62168550:-	tag:tandem
Dpp4:m4302:t:2	u:41762	chr2:62169852:62170674:-	u:41760	chr2:62169689:62169793:-	tag:tandem
2310046K01Rik:m4302:t:0	u:46840	chr2:151833752:151834725:+	u:46841	chr2:151834726:151834993:+	tag:tandem
Dpp6:m4302:t:0	u:59743	chr5:28052291:28052611:+	u:59744	chr5:28052612:28053022:+	tag:tandem
Dpp6:m4302:t:1	u:59743	chr5:28052291:28052611:+	u:59745	chr5:28053023:28054040:+	tag:tandem
Dpp6:m4302:t:2	u:59744	chr5:28052612:28053022:+	u:59745	chr5:28053023:28054040:+	tag:tandem
Slc39a9:m4302:a:0	u:18092	chr12:81778343:81779340:+	u:18094	chr12:81782293:81784222:+	tag:alter
Slc39a1:m4302:t:0	u:50532	chr3:90055607:90057164:+	u:50533	chr3:90057165:90057538:+	tag:tandem
Slc39a3:m4302:t:0	u:6112	chr10:80493538:80493701:-	u:6111	chr10:80491285:80493537:-	tag:tandem
Gpr146:m4302:t:0	u:61865	chr5:139869400:139869772:+	u:61866	chr5:139869773:139872367:+	tag:tandem
Gpr149:m4302:t:0	u:48170	chr3:62333885:62334457:-	u:48169	chr3:62333352:62333884:-	tag:tandem
Hnrnpa2b1:m4302:t:0	u:62709	chr6:51411939:51412649:-	u:62706	chr6:51411240:51411413:-	tag:tandem
Hnrnpa2b1:m4302:t:1	u:62711	chr6:51412762:51413253:-	u:62706	chr6:51411240:51411413:-	tag:tandem
Hnrnpa2b1:m4302:t:2	u:62711	chr6:51412762:51413253:-	u:62709	chr6:51411939:51412649:-	tag:tandem
Sipa1l1:m4302:t:0	u:18145	chr12:83550925:83551251:+	u:18146	chr12:83551252:83552770:+	tag:tandem
Morc3:m4302:t:0	u:31480	chr16:93875157:93876151:+	u:31481	chr16:93876152:93876317:+	tag:tandem
Rabl5:m4302:t:0	u:61730	chr5:137389114:137390379:+	u:61731	chr5:137390380:137391273:+	tag:tandem
Rfxap:m4302:t:0	u:48111	chr3:54608115:54608386:-	u:48110	chr3:54607037:54608114:-	tag:tandem
Ints10:m4302:a:0	u:75723	chr8:71320850:71322469:+	u:75728	chr8:71351680:71353308:+	tag:alter
Syap1:m4302:t:0	u:83361	chrX:159295157:159295815:-	u:83360	chrX:159294775:159295156:-	tag:tandem
Pias1:m4302:t:0	u:78388	chr9:62728130:62729501:-	u:78384	chr9:62726294:62726661:-	tag:tandem
Tsga14:m4302:a:0	u:62395	chr6:30629088:30630194:-	u:62384	chr6:30603457:30605662:-	tag:alter
Hipk2:m4302:t:0	u:62510	chr6:38647839:38648133:-	u:62509	chr6:38647389:38647838:-	tag:tandem
Tkt:m4302:t:0	u:24422	chr14:31386698:31386807:+	u:24423	chr14:31386808:31387907:+	tag:tandem
Ndel1:m4302:a:0	u:10193	chr11:68642818:68643412:-	u:10192	chr11:68634949:68636159:-	tag:alter
Eef1d:m4302:t:0	u:26392	chr15:75725919:75725982:-	u:26390	chr15:75725230:75725835:-	tag:tandem
Plxnc1:m4302:t:0	u:6528	chr10:94254968:94255930:-	u:6527	chr10:94253612:94254967:-	tag:tandem
Ddb2:m4302:t:0	u:42134	chr2:91051905:91052104:-	u:42133	chr2:91051703:91051904:-	tag:tandem
AK041465;Nbeal1:m4302:t:0	u:3109	chr1:60386874:60388305:+	u:3110	chr1:60388306:60391548:+	tag:tandem
Mfn2:m4302:t:0	u:53903	chr4:147247972:147249084:-	u:53901	chr4:147247704:147247912:-	tag:tandem
Bzw1:m4302:t:0	u:3013	chr1:58461910:58462333:+	u:3014	chr1:58462334:58463391:+	tag:tandem
Bzw1:m4302:t:1	u:3013	chr1:58461910:58462333:+	u:3015	chr1:58463392:58464196:+	tag:tandem
Bzw1:m4302:t:2	u:3014	chr1:58462334:58463391:+	u:3015	chr1:58463392:58464196:+	tag:tandem
mKIAA0878;Rhobtb3:m4302:t:0	u:20283	chr13:76009692:76009855:-	u:20282	chr13:76006985:76009691:-	tag:tandem
St8sia2:m4302:t:0	u:68606	chr7:81084835:81088064:-	u:68605	chr7:81084005:81084834:-	tag:tandem
Ephb2:m4302:t:0	u:53642	chr4:136210198:136211236:-	u:53641	chr4:136209521:136210197:-	tag:tandem
Ephb2:m4302:a:0	u:53643	chr4:136325307:136326793:-	u:53641	chr4:136209521:136210197:-	tag:alter
Ephb2:m4302:a:1	u:53643	chr4:136325307:136326793:-	u:53642	chr4:136210198:136211236:-	tag:alter
Ugcgl1;Uggt1:m4302:t:0	u:265	chr1:36199236:36200296:-	u:264	chr1:36198376:36199235:-	tag:tandem
Ugcgl1;Uggt1:m4302:t:1	u:266	chr1:36200297:36201070:-	u:264	chr1:36198376:36199235:-	tag:tandem
Ugcgl1;Uggt1:m4302:t:2	u:266	chr1:36200297:36201070:-	u:265	chr1:36199236:36200296:-	tag:tandem
Atp9b;MMR:m4302:t:0	u:36679	chr18:80931127:80931816:-	u:36677	chr18:80929242:80930879:-	tag:tandem
Atp9b;MMR:m4302:t:1	u:36680	chr18:80931817:80932888:-	u:36677	chr18:80929242:80930879:-	tag:tandem
Atp9b;MMR:m4302:t:2	u:36680	chr18:80931817:80932888:-	u:36679	chr18:80931127:80931816:-	tag:tandem
Elovl7:m4302:t:0	u:22161	chr13:109072901:109073674:+	u:22162	chr13:109073675:109075256:+	tag:tandem
Elovl7:m4302:t:1	u:22161	chr13:109072901:109073674:+	u:22163	chr13:109075257:109077078:+	tag:tandem
Elovl7:m4302:t:2	u:22162	chr13:109073675:109075256:+	u:22163	chr13:109075257:109077078:+	tag:tandem
Ube2i:m4302:a:0	u:32059	chr17:25403522:25405402:-	u:32057	chr17:25397456:25399175:-	tag:alter
Ube2k:m4302:t:0	u:60295	chr5:65986188:65986386:+	u:60298	chr5:65987269:65987640:+	tag:tandem
Ube2k:m4302:t:1	u:60295	chr5:65986188:65986386:+	u:60299	chr5:65987641:65987827:+	tag:tandem
Ube2k:m4302:t:2	u:60298	chr5:65987269:65987640:+	u:60299	chr5:65987641:65987827:+	tag:tandem
Ube2b:m4302:t:0	u:9839	chr11:51799378:51799544:-	u:9838	chr11:51799060:51799377:-	tag:tandem
Ube2f:m4302:t:0	u:3575	chr1:93181932:93182184:+	u:3577	chr1:93182240:93182358:+	tag:tandem
Ube2f:m4302:t:1	u:3575	chr1:93181932:93182184:+	u:3578	chr1:93182359:93182534:+	tag:tandem
Ube2f:m4302:t:2	u:3575	chr1:93181932:93182184:+	u:3581	chr1:93183098:93185453:+	tag:tandem
Ube2f:m4302:t:3	u:3577	chr1:93182240:93182358:+	u:3578	chr1:93182359:93182534:+	tag:tandem
Ube2f:m4302:t:4	u:3577	chr1:93182240:93182358:+	u:3581	chr1:93183098:93185453:+	tag:tandem
Ube2f:m4302:t:5	u:3578	chr1:93182359:93182534:+	u:3581	chr1:93183098:93185453:+	tag:tandem
Ube2z:m4302:t:0	u:10986	chr11:95909888:95910426:-	u:10983	chr11:95908744:95909378:-	tag:tandem
Ube2w:m4302:a:0	u:135	chr1:16559865:16560160:-	u:131	chr1:16530871:16531852:-	tag:alter
Ube2w:m4302:a:1	u:137	chr1:16560214:16560631:-	u:131	chr1:16530871:16531852:-	tag:alter
Ube2w:m4302:a:2	u:138	chr1:16560632:16561136:-	u:131	chr1:16530871:16531852:-	tag:alter
Ube2w:m4302:a:3	u:139	chr1:16561137:16561349:-	u:131	chr1:16530871:16531852:-	tag:alter
Ube2w:m4302:t:0	u:137	chr1:16560214:16560631:-	u:135	chr1:16559865:16560160:-	tag:tandem
Ube2w:m4302:t:1	u:138	chr1:16560632:16561136:-	u:135	chr1:16559865:16560160:-	tag:tandem
Ube2w:m4302:t:2	u:139	chr1:16561137:16561349:-	u:135	chr1:16559865:16560160:-	tag:tandem
Ube2w:m4302:t:3	u:138	chr1:16560632:16561136:-	u:137	chr1:16560214:16560631:-	tag:tandem
Ube2w:m4302:t:4	u:139	chr1:16561137:16561349:-	u:137	chr1:16560214:16560631:-	tag:tandem
Ube2w:m4302:t:5	u:139	chr1:16561137:16561349:-	u:138	chr1:16560632:16561136:-	tag:tandem
Treml2:m4302:a:0	u:35089	chr17:48445707:48445890:+	u:35090	chr17:48448829:48450487:+	tag:alter
Treml2:m4302:a:1	u:35089	chr17:48445707:48445890:+	u:35091	chr17:48450488:48451866:+	tag:alter
Treml2:m4302:t:0	u:35090	chr17:48448829:48450487:+	u:35091	chr17:48450488:48451866:+	tag:tandem
Sbf2:m4302:t:0	u:69281	chr7:117451920:117452911:-	u:69279	chr7:117451527:117451816:-	tag:tandem
[truncated: 6,079 more rows]
